# Supplementary material for: Unveiling genetic architecture of white matter microstructure through unsupervised deep representation learning of fractional anisotropy maps
Source: Research Square preprint supplement (doi:10.21203/rs.3.rs-7411165/v1), 2025-09-17
Supplement: Supplementary file 1 [file 5289918a3017d62f45ab1954.xlsx]

## Sheet: Table S1
Table S1 | The assocition between UDIP-Fas and traditional FA metric
Traditional FA metric	R2 Score	P values
Mean FA in anterior corona radiata on FA skeleton (left)	0.4713	<9.32E-105
Mean FA in anterior corona radiata on FA skeleton (right)	0.3614	<9.32E-105
Mean FA in anterior limb of internal capsule on FA skeleton (left)	0.6145	<9.32E-105
Mean FA in anterior limb of internal capsule on FA skeleton (right)	0.5983	<9.32E-105
Mean FA in body of corpus callosum on FA skeleton	0.3632	<9.32E-105
Mean FA in cerebral peduncle on FA skeleton (left)	0.7682	<9.32E-105
Mean FA in cerebral peduncle on FA skeleton (right)	0.3874	<9.32E-105
Mean FA in cingulum cingulate gyrus on FA skeleton (left)	0.3391	<9.32E-105
Mean FA in cingulum cingulate gyrus on FA skeleton (right)	0.3777	<9.32E-105
Mean FA in cingulum hippocampus on FA skeleton (left)	0.3708	<9.32E-105
Mean FA in cingulum hippocampus on FA skeleton (right)	0.4133	<9.32E-105
Mean FA in corticospinal tract on FA skeleton (left)	0.4148	<9.32E-105
Mean FA in corticospinal tract on FA skeleton (right)	0.3171	<9.32E-105
Mean FA in external capsule on FA skeleton (left)	0.3035	<9.32E-105
Mean FA in external capsule on FA skeleton (right)	0.3948	<9.32E-105
Mean FA in fornix cres+stria terminalis on FA skeleton (left)	0.3994	<9.32E-105
Mean FA in fornix cres+stria terminalis on FA skeleton (right)	0.4137	<9.32E-105
Mean FA in fornix on FA skeleton	0.4074	<9.32E-105
Mean FA in genu of corpus callosum on FA skeleton	0.4973	<9.32E-105
Mean FA in inferior cerebellar peduncle on FA skeleton (left)	0.492	<9.32E-105
Mean FA in inferior cerebellar peduncle on FA skeleton (right)	0.4711	<9.32E-105
Mean FA in medial lemniscus on FA skeleton (left)	0.4326	<9.32E-105
Mean FA in medial lemniscus on FA skeleton (right)	0.6821	<9.32E-105
Mean FA in middle cerebellar peduncle on FA skeleton	0.7087	<9.32E-105
Mean FA in pontine crossing tract on FA skeleton	0.5663	<9.32E-105
Mean FA in posterior corona radiata on FA skeleton (left)	0.5668	<9.32E-105
Mean FA in posterior corona radiata on FA skeleton (right)	0.587	<9.32E-105
Mean FA in posterior limb of internal capsule on FA skeleton (left)	0.5301	<9.32E-105
Mean FA in posterior limb of internal capsule on FA skeleton (right)	0.5709	<9.32E-105
Mean FA in posterior thalamic radiation on FA skeleton (left)	0.5774	<9.32E-105
Mean FA in posterior thalamic radiation on FA skeleton (right)	0.442	<9.32E-105
Mean FA in retrolenticular part of internal capsule on FA skeleton (left)	0.3943	<9.32E-105
Mean FA in retrolenticular part of internal capsule on FA skeleton (right)	0.5254	<9.32E-105
Mean FA in sagittal stratum on FA skeleton (left)	0.5163	<9.32E-105
Mean FA in sagittal stratum on FA skeleton (right)	0.417	<9.32E-105
Mean FA in splenium of corpus callosum on FA skeleton	0.4375	<9.32E-105
Mean FA in superior cerebellar peduncle on FA skeleton (left)	0.3176	<9.32E-105
Mean FA in superior cerebellar peduncle on FA skeleton (right)	0.3415	<9.32E-105
Mean FA in superior corona radiata on FA skeleton (left)	0.5672	<9.32E-105
Mean FA in superior corona radiata on FA skeleton (right)	0.6089	<9.32E-105
Mean FA in superior fronto-occipital fasciculus on FA skeleton (left)	0.5221	<9.32E-105
Mean FA in superior fronto-occipital fasciculus on FA skeleton (right)	0.4896	<9.32E-105
Mean FA in superior longitudinal fasciculus on FA skeleton (left)	0.4632	<9.32E-105
Mean FA in superior longitudinal fasciculus on FA skeleton (right)	0.5379	<9.32E-105
Mean FA in tapetum on FA skeleton (left)	0.2977	<9.32E-105
Mean FA in tapetum on FA skeleton (right)	0.314	<9.32E-105
Mean FA in uncinate fasciculus on FA skeleton (left)	0.5277	<9.32E-105
Mean FA in uncinate fasciculus on FA skeleton (right)	0.4554	<9.32E-105

## Sheet: Table S2
Table S2 | The heritability of UDIP-FAs
UDIP-FA	Heritability	P-value	FDR
Feature_UDIP0	0.568959	5.1393e-05	0.000119606
Feature_UDIP1	0.423173	0.00737657	0.00944201
Feature_UDIP2	0.693794	3.69599e-09	4.30079e-08
Feature_UDIP3	0.564688	3.32529e-05	8.34583e-05
Feature_UDIP4	0.667858	2.03624e-08	1.86171e-07
Feature_UDIP5	0.573674	0.000119282	0.00024626
Feature_UDIP6	0.520056	0.000301738	0.000551749
Feature_UDIP7	0.385824	0.0217694	0.0253317
Feature_UDIP8	0.291242	0.0809924	0.0871179
Feature_UDIP9	0.767183	1.13103e-09	1.60858e-08
Feature_UDIP10	0.539268	8.29537e-05	0.000175727
Feature_UDIP11	0.679684	4.23509e-08	3.01162e-07
Feature_UDIP12	0.488092	0.00427893	0.00601871
Feature_UDIP13	0.408517	0.00261333	0.00388961
Feature_UDIP14	0.803836	2.4354e-12	6.23462e-11
Feature_UDIP15	0.510894	0.000893585	0.00148544
Feature_UDIP16	0.218857	0.163651	0.171699
Feature_UDIP17	0.562361	2.329e-05	6.21067e-05
Feature_UDIP18	0.278634	0.0686817	0.075139
Feature_UDIP19	0.579755	3.86076e-05	9.50341e-05
Feature_UDIP20	0.671152	3.88498e-07	2.16208e-06
Feature_UDIP21	0.361792	0.0176763	0.0215483
Feature_UDIP22	0.379969	0.00893461	0.0112121
Feature_UDIP23	0.660132	3.29483e-08	2.48081e-07
Feature_UDIP24	0.362666	0.0207025	0.0243112
Feature_UDIP25	0.511938	0.00024253	0.000470361
Feature_UDIP26	0.0916445	0.582627	0.587215
Feature_UDIP27	0.658806	5.00522e-06	1.59456e-05
Feature_UDIP28	0.463906	0.00172885	0.00266618
Feature_UDIP29	0.57222	8.20142e-05	0.000175727
Feature_UDIP30	0.668396	5.65122e-08	3.80714e-07
Feature_UDIP31	0.498698	0.00081083	0.00138276
Feature_UDIP32	0.296019	0.0674781	0.0744586
Feature_UDIP33	0.809509	5.39581e-14	1.72666e-12
Feature_UDIP34	0.356943	0.0251382	0.0289882
Feature_UDIP35	0.59907	9.79784e-06	2.85028e-05
Feature_UDIP36	0.234403	0.141579	0.14977
Feature_UDIP37	0.674927	1.46799e-06	6.71081e-06
Feature_UDIP38	0.418163	0.00619965	0.00818098
Feature_UDIP39	0.82938	5.62448e-22	3.59967e-20
Feature_UDIP40	0.76892	1.32907e-09	1.70121e-08
Feature_UDIP41	0.663805	6.79937e-07	3.48128e-06
Feature_UDIP42	0.554322	0.00014618	0.000297001
Feature_UDIP43	0.588105	1.59157e-06	7.02486e-06
Feature_UDIP44	0.695946	9.57228e-09	1.02104e-07
Feature_UDIP45	0.553047	0.000188828	0.000371846
Feature_UDIP46	0.629795	1.99322e-06	8.50441e-06
Feature_UDIP47	0.613607	2.07086e-06	8.55065e-06
Feature_UDIP48	0.498062	0.00177733	0.00270831
Feature_UDIP49	0.650894	1.46645e-06	6.71081e-06
Feature_UDIP50	0.481544	0.000702806	0.00121566
Feature_UDIP51	0.518213	0.000986388	0.00161869
Feature_UDIP52	0.474511	0.00113736	0.00184281
Feature_UDIP53	0.464104	0.00120003	0.00192005
Feature_UDIP54	0.218858	0.191008	0.198773
Feature_UDIP55	0.477388	0.000821014	0.00138276
Feature_UDIP56	0.437547	0.00293458	0.00431754
Feature_UDIP57	0.0685337	0.684149	0.684149
Feature_UDIP58	0.190058	0.219252	0.226325
Feature_UDIP59	0.605931	9.99332e-07	4.91979e-06
Feature_UDIP60	0.162129	0.362142	0.36789
Feature_UDIP61	0.485695	0.00132493	0.00209372
Feature_UDIP62	0.459857	0.0030161	0.00438705
Feature_UDIP63	0.584473	1.30964e-05	3.7252e-05
Feature_UDIP64	0.330847	0.0332532	0.0373369
Feature_UDIP65	0.437942	0.0049405	0.00679983
Feature_UDIP66	0.659699	8.23408e-08	5.26981e-07
Feature_UDIP67	0.592507	2.36118e-06	9.35377e-06
Feature_UDIP68	0.33776	0.0367694	0.0409259
Feature_UDIP69	0.681154	2.3887e-07	1.38979e-06
Feature_UDIP70	0.767429	1.14617e-11	2.09585e-10
Feature_UDIP71	0.626375	2.89522e-06	1.05882e-05
Feature_UDIP72	0.309618	0.0777654	0.0843557
Feature_UDIP73	0.596946	4.03675e-06	1.32488e-05
Feature_UDIP74	0.533314	7.37012e-05	0.000162651
Feature_UDIP75	0.743718	4.32713e-10	6.92341e-09
Feature_UDIP76	0.39297	0.0191372	0.0231091
Feature_UDIP77	0.73952	1.08221e-08	1.06556e-07
Feature_UDIP78	0.536652	0.000297873	0.000551749
Feature_UDIP79	0.507059	0.00028232	0.000531426
Feature_UDIP80	0.601655	3.33307e-06	1.15306e-05
Feature_UDIP81	0.68111	1.74373e-07	1.06284e-06
Feature_UDIP82	0.415507	0.00467378	0.00650265
Feature_UDIP83	0.692398	2.62135e-08	2.23689e-07
Feature_UDIP84	0.438829	0.00707115	0.0091425
Feature_UDIP85	0.671477	4.88511e-07	2.60539e-06
Feature_UDIP86	0.836806	1.76399e-20	7.52636e-19
Feature_UDIP87	0.487093	0.00142328	0.00222171
Feature_UDIP88	0.647267	2.62212e-06	9.87151e-06
Feature_UDIP89	0.406002	0.00956736	0.0118895
Feature_UDIP90	0.56197	2.0668e-05	5.62873e-05
Feature_UDIP91	0.519213	0.000360857	0.000632736
Feature_UDIP92	0.518347	0.000354782	0.000630724
Feature_UDIP93	0.568905	2.53573e-05	6.62395e-05
Feature_UDIP94	0.444766	0.00610694	0.00814259
Feature_UDIP95	0.360548	0.031994	0.036241
Feature_UDIP96	0.311208	0.0206343	0.0243112
Feature_UDIP97	0.51592	0.000308884	0.000556861
Feature_UDIP98	0.596594	8.37451e-05	0.000175727
Feature_UDIP99	0.484546	0.00386396	0.00549541
Feature_UDIP100	0.619094	5.64065e-06	1.71906e-05
Feature_UDIP101	0.601587	5.10757e-06	1.59456e-05
Feature_UDIP102	0.543909	4.69555e-05	0.000113402
Feature_UDIP103	0.659812	2.90009e-08	2.32007e-07
Feature_UDIP104	0.600608	1.4513e-05	4.0384e-05
Feature_UDIP105	0.532783	0.000280779	0.000531426
Feature_UDIP106	0.593274	6.46277e-05	0.00014772
Feature_UDIP107	0.259182	0.102209	0.109023
Feature_UDIP108	0.603577	3.47714e-06	1.17125e-05
Feature_UDIP109	0.435458	0.00583445	0.00786115
Feature_UDIP110	0.471744	0.00337692	0.00485669
Feature_UDIP111	0.558681	9.3997e-06	2.79805e-05
Feature_UDIP112	0.391842	0.00825232	0.0104584
Feature_UDIP113	0.592097	3.28718e-06	1.15306e-05
Feature_UDIP114	0.549755	2.99583e-05	7.66932e-05
Feature_UDIP115	0.450013	0.00226517	0.00341108
Feature_UDIP116	0.188244	0.272603	0.279145
Feature_UDIP117	0.571258	7.09587e-05	0.000159346
Feature_UDIP118	0.610425	4.91829e-05	0.000116582
Feature_UDIP119	0.37956	0.0156024	0.019203
Feature_UDIP120	0.503073	0.000165949	0.000331898
Feature_UDIP121	0.852233	3.47697e-26	4.45052e-24
Feature_UDIP122	0.760773	6.4912e-12	1.38479e-10
Feature_UDIP123	0.353803	0.020671	0.0243112
Feature_UDIP124	0.598027	2.41152e-06	9.35377e-06
Feature_UDIP125	0.448453	0.00524688	0.00714469
Feature_UDIP126	0.379812	0.00691142	0.00902716
Feature_UDIP127	0.365377	0.0257101	0.029383

## Sheet: Table S3
Table S3 | The genetic correlation between discovery cohort and replication cohort
P1	P2	rg	SE	Z	P	h2_obs	h2_obs_se	h2_int	h2_int_se	gcov_int	gcov_int_se	FDR
UDIP-FA_0	UDIP-FA_0	1.1953	0.1715	6.969	3.193e-12	0.2608	0.0586	1.008	0.0069	0.0029	0.0052	1.48597e-11
UDIP-FA_10	UDIP-FA_10	0.8573	0.1636	5.2402	1.604e-07	0.267	0.053	0.9973	0.0067	0.008	0.0044	2.2055e-07
UDIP-FA_100	UDIP-FA_100	1.2154	0.1792	6.7807	1.1956e-11	0.2264	0.0597	0.9921	0.0067	0.0015	0.0053	4.01854e-11
UDIP-FA_101	UDIP-FA_101	1.0632	0.192	5.5387	3.0469e-08	0.2306	0.0558	1.0058	0.0065	0.011	0.0047	4.85099e-08
UDIP-FA_102	UDIP-FA_102	1.4089	0.3082	4.5712	4.8492e-06	0.1477	0.0607	1.0054	0.0068	0.0003	0.0051	5.64186e-06
UDIP-FA_103	UDIP-FA_103	1.0021	0.1274	7.865	3.6923e-15	0.3069	0.0597	1.006	0.0062	0.0048	0.0049	5.5846e-14
UDIP-FA_104	UDIP-FA_104	0.9772	0.2259	4.3255	1.5217e-05	0.2007	0.056	1.0035	0.0062	0.0101	0.005	1.67387e-05
UDIP-FA_105	UDIP-FA_105	1.042	0.1611	6.4663	1.0041e-10	0.2534	0.0554	1.0017	0.0069	0.008	0.0055	2.47951e-10
UDIP-FA_106	UDIP-FA_106	1.1277	0.1906	5.9167	3.2855e-09	0.2028	0.0571	1.0008	0.0067	-0.0019	0.0053	6.73806e-09
UDIP-FA_107	UDIP-FA_107	0.9784	0.1629	6.007	1.8899e-09	0.2445	0.0563	0.9929	0.0067	0.002	0.0046	4.01189e-09
UDIP-FA_108	UDIP-FA_108	0.8143	0.1617	5.0368	4.7328e-07	0.2224	0.053	0.9985	0.0066	0.0033	0.0046	6.15773e-07
UDIP-FA_109	UDIP-FA_109	1.0704	0.2052	5.2158	1.83e-07	0.2045	0.0556	1.004	0.0063	0.0055	0.0051	2.48798e-07
UDIP-FA_11	UDIP-FA_11	0.9018	0.1164	7.7477	9.3591e-15	0.3364	0.0613	0.9983	0.0068	0.0084	0.005	1.13245e-13
UDIP-FA_110	UDIP-FA_110	0.703	0.1231	5.7119	1.1174e-08	0.324	0.0612	0.9886	0.0066	0.0124	0.0044	2.01799e-08
UDIP-FA_111	UDIP-FA_111	0.9733	0.1981	4.9146	8.8941e-07	0.209	0.0568	1.0015	0.0072	0.0088	0.0048	1.10947e-06
UDIP-FA_112	UDIP-FA_112	0.9632	0.1881	4.7146	4.8941e-07	0.109	0.0368	1.0015	0.0072	0.0088	0.0048	3.10947e-06
UDIP-FA_113	UDIP-FA_113	1.2349	0.2203	5.6051	2.0816e-08	0.1889	0.0534	1.0065	0.006	0.0054	0.0045	3.4037e-08
UDIP-FA_114	UDIP-FA_114	0.9107	0.1576	5.7803	7.4569e-09	0.237	0.0576	0.998	0.0068	0.0071	0.005	1.40982e-08
UDIP-FA_115	UDIP-FA_115	0.9388	0.1186	7.919	2.395e-15	0.3505	0.0626	0.9878	0.0067	-0.0097	0.006	4.82992e-14
UDIP-FA_116	UDIP-FA_116	1.0318	0.1642	6.2849	3.2799e-10	0.2245	0.0557	1.0037	0.006	0.0052	0.0046	7.78172e-10
UDIP-FA_117	UDIP-FA_117	0.837	0.1449	5.7773	7.5921e-09	0.2633	0.0607	1.003	0.0066	0.0011	0.0048	1.4133e-08
UDIP-FA_118	UDIP-FA_118	0.7249	0.1437	5.046	4.5113e-07	0.2518	0.0568	1.001	0.0071	0.0113	0.0043	5.93334e-07
UDIP-FA_119	UDIP-FA_119	0.8698	0.1166	7.4619	8.5268e-14	0.382	0.0627	0.9946	0.0066	0.0092	0.0051	6.44839e-13
UDIP-FA_12	UDIP-FA_12	0.8663	0.1216	7.1235	1.0518e-12	0.3042	0.0545	1.0042	0.0066	0.0043	0.005	6.36339e-12
UDIP-FA_120	UDIP-FA_120	0.87	0.1254	6.9388	3.9555e-12	0.3129	0.0809	0.9976	0.0082	0.001	0.0057	1.70934e-11
UDIP-FA_121	UDIP-FA_121	1.0282	0.1472	6.9839	2.8716e-12	0.2452	0.0563	1.003	0.0062	0.0018	0.0045	1.38985e-11
UDIP-FA_122	UDIP-FA_122	0.774	0.1261	6.1391	8.2988e-10	0.2952	0.0608	0.9955	0.0063	0.0059	0.005	1.82574e-09
UDIP-FA_123	UDIP-FA_123	0.9519	0.2063	4.6153	3.9244e-06	0.2112	0.0574	0.9922	0.0062	0.0033	0.0045	4.61022e-06
UDIP-FA_125	UDIP-FA_125	0.8655	0.1497	5.781	7.4245e-09	0.2836	0.0629	0.9919	0.0061	-0.0017	0.0047	1.40982e-08
UDIP-FA_126	UDIP-FA_126	0.6269	0.1498	4.1861	2.8383e-05	0.2745	0.0546	0.9913	0.0063	0.0155	0.0049	3.03924e-05
UDIP-FA_127	UDIP-FA_127	1.1533	0.1677	6.8767	6.1235e-12	0.2699	0.0559	0.994	0.0069	-0.0123	0.0049	2.36646e-11
UDIP-FA_13	UDIP-FA_13	1.5859	0.4048	3.9172	8.9571e-05	0.1085	0.0544	1.0171	0.0057	-9.1171e-05	0.0045	9.34318e-05
UDIP-FA_14	UDIP-FA_14	0.6896	0.1239	5.5667	2.5965e-08	0.31	0.0538	0.9929	0.006	0.009	0.0044	4.18902e-08
UDIP-FA_15	UDIP-FA_15	1.1251	0.1498	7.5119	5.8288e-14	0.2536	0.056	1.0062	0.006	0.0022	0.0044	4.7019e-13
UDIP-FA_16	UDIP-FA_16	1.0123	0.1862	5.438	5.3878e-08	0.2581	0.0562	0.9956	0.0064	0.009	0.0045	8.14905e-08
UDIP-FA_17	UDIP-FA_17	1.0987	0.1606	6.8431	7.7475e-12	0.2501	0.0646	1.0004	0.0069	-0.0009	0.0052	2.84075e-11
UDIP-FA_18	UDIP-FA_18	1.383	0.3059	4.5211	6.151e-06	0.1414	0.0567	1.0099	0.0069	0.004	0.0047	7.0883e-06
UDIP-FA_19	UDIP-FA_19	0.94	0.1447	6.4964	8.2283e-11	0.2794	0.0609	0.997	0.0065	-0.0019	0.0048	2.2125e-10
UDIP-FA_2	UDIP-FA_2	1.2073	0.1856	6.5059	7.7242e-11	0.2549	0.0656	1.0053	0.0071	0.0043	0.0045	2.12415e-10
UDIP-FA_20	UDIP-FA_20	0.8951	0.1159	7.721	1.154e-14	0.3507	0.0548	0.9954	0.0068	0.0004	0.0048	1.2694e-13
UDIP-FA_21	UDIP-FA_21	1.066	0.1551	6.8736	6.2584e-12	0.2682	0.0539	1.0014	0.007	0.0048	0.0051	2.36646e-11
UDIP-FA_22	UDIP-FA_22	0.9423	0.1524	6.1839	6.2518e-10	0.2449	0.0544	0.9969	0.0061	0.0012	0.0049	1.40087e-09
UDIP-FA_23	UDIP-FA_23	1.2343	0.2029	6.0822	1.1852e-09	0.1986	0.0599	1.0013	0.0072	-0.0044	0.0043	2.56088e-09
UDIP-FA_24	UDIP-FA_24	1.162	0.1452	8.0029	1.2154e-15	0.2768	0.059	0.9923	0.007	0.0011	0.0047	2.94127e-14
UDIP-FA_25	UDIP-FA_25	1.0732	0.1684	6.3729	1.8548e-10	0.2404	0.0614	1.0096	0.0069	0.0123	0.005	4.48862e-10
UDIP-FA_26	UDIP-FA_26	1.1228	0.2243	5.0067	5.5376e-07	0.1854	0.0595	1.0049	0.0068	-0.0039	0.0051	7.12819e-07
UDIP-FA_27	UDIP-FA_27	0.8828	0.1336	6.6088	3.8739e-11	0.3348	0.0553	0.9982	0.0061	0.0069	0.005	1.2019e-10
UDIP-FA_28	UDIP-FA_28	0.8207	0.1609	5.1007	3.3846e-07	0.2479	0.0566	0.9978	0.0065	0.0038	0.0043	4.55041e-07
UDIP-FA_29	UDIP-FA_29	0.8423	0.143	5.8916	3.8244e-09	0.2604	0.0569	0.9975	0.0066	0.014	0.0044	7.5861e-09
UDIP-FA_3	UDIP-FA_3	1.1098	0.1578	7.0318	2.0391e-12	0.2464	0.0581	1.0079	0.007	0.0039	0.005	1.07274e-11
UDIP-FA_30	UDIP-FA_30	0.6221	0.1413	4.4014	1.0754e-05	0.3403	0.0648	0.9852	0.0071	0.0067	0.0049	1.20001e-05
UDIP-FA_31	UDIP-FA_31	0.8945	0.1888	4.7375	2.1634e-06	0.2167	0.0529	1.0024	0.0066	0.004	0.0042	2.61771e-06
UDIP-FA_32	UDIP-FA_32	0.773	0.1296	5.964	2.461e-09	0.2753	0.0582	1.0089	0.0069	0.0145	0.005	5.13416e-09
UDIP-FA_33	UDIP-FA_33	1.036	0.1836	5.6416	1.6845e-08	0.235	0.061	1.005	0.007	0.0039	0.0049	2.87077e-08
UDIP-FA_34	UDIP-FA_34	1.249	0.2136	5.8474	4.9917e-09	0.1853	0.0526	1.0011	0.0064	0.0017	0.0044	9.74187e-09
UDIP-FA_35	UDIP-FA_35	1.0262	0.151	6.7975	1.0644e-11	0.2242	0.0553	1.0018	0.0066	0.0108	0.0044	3.78801e-11
UDIP-FA_36	UDIP-FA_36	1.0048	0.3373	2.9787	0.0029	0.0998	0.0508	1.0079	0.0065	0.0052	0.0045	0.0029
UDIP-FA_37	UDIP-FA_37	1.2339	0.4056	3.0423	0.0023	0.1019	0.06	1.0126	0.007	0.0026	0.0046	0.00231917
UDIP-FA_38	UDIP-FA_38	1.3382	0.2048	6.5325	6.4696e-11	0.2078	0.0606	1.0112	0.0068	-0.0002	0.0052	1.90932e-10
UDIP-FA_39	UDIP-FA_39	1.0871	0.1517	7.165	7.7805e-13	0.2783	0.0569	0.9976	0.0065	0.0033	0.0051	4.95495e-12
UDIP-FA_4	UDIP-FA_4	0.7163	0.1257	5.6999	1.199e-08	0.2934	0.0584	0.9957	0.006	0.0107	0.0046	2.10259e-08
UDIP-FA_40	UDIP-FA_40	1.035	0.1328	7.7926	6.5653e-15	0.2808	0.0583	1.0011	0.0069	-0.0017	0.0055	8.82668e-14
UDIP-FA_41	UDIP-FA_41	0.7479	0.1898	3.9402	8.1414e-05	0.1767	0.0539	1.0036	0.0063	0.009	0.0047	8.56617e-05
UDIP-FA_42	UDIP-FA_42	0.9658	0.1477	6.5404	6.1366e-11	0.2755	0.0528	1.0001	0.0062	-0.0007	0.005	1.85632e-10
UDIP-FA_43	UDIP-FA_43	1.7438	0.5045	3.4561	0.0005	0.0882	0.0499	1.004	0.0067	0.0027	0.0048	0.000508403
UDIP-FA_44	UDIP-FA_44	1.0202	0.1577	6.467	9.9968e-11	0.2778	0.0588	1.0007	0.0067	0.0015	0.0049	2.47951e-10
UDIP-FA_45	UDIP-FA_45	1.0196	0.23	4.4339	9.2565e-06	0.1888	0.0618	1.005	0.0072	0.0014	0.0047	1.04712e-05
UDIP-FA_46	UDIP-FA_46	0.9228	0.1753	5.2636	1.4128e-07	0.2098	0.0583	1.0112	0.0069	0.0056	0.0056	1.98778e-07
UDIP-FA_47	UDIP-FA_47	0.8786	0.1673	5.2533	1.4943e-07	0.1911	0.0585	1.0134	0.0067	0.0086	0.0047	2.07828e-07
UDIP-FA_48	UDIP-FA_48	0.9041	0.1062	8.5144	1.6752e-17	0.3728	0.0628	0.9971	0.0065	0.0033	0.0048	6.75664e-16
UDIP-FA_49	UDIP-FA_49	0.9526	0.1404	6.7832	1.1751e-11	0.2618	0.0551	1.0115	0.0065	0.0033	0.0046	4.01854e-11
UDIP-FA_5	UDIP-FA_5	1.1541	0.25	4.6164	3.905e-06	0.1523	0.0594	1.0083	0.0069	0.005	0.0051	4.61022e-06
UDIP-FA_50	UDIP-FA_50	1.208	0.1856	6.5069	7.6705e-11	0.2197	0.0535	1.004	0.0067	0.0005	0.0047	2.12415e-10
UDIP-FA_51	UDIP-FA_51	0.7989	0.167	4.7847	1.7125e-06	0.2673	0.0558	1.0017	0.0061	0.0081	0.0049	2.09306e-06
UDIP-FA_52	UDIP-FA_52	0.9116	0.2138	4.2641	2.0067e-05	0.1454	0.054	1.0141	0.0061	0.0103	0.0046	2.18748e-05
UDIP-FA_53	UDIP-FA_53	0.889	0.1586	5.607	2.059e-08	0.2268	0.0623	1.0048	0.0067	0.0101	0.0046	3.4037e-08
UDIP-FA_54	UDIP-FA_54	0.7303	0.1482	4.9293	8.2507e-07	0.2406	0.0548	0.9888	0.0062	0.0083	0.0048	1.03993e-06
UDIP-FA_55	UDIP-FA_55	1.3761	0.3829	3.5935	0.0003	0.1121	0.0524	0.9999	0.0063	0.0021	0.0048	0.000307627
UDIP-FA_56	UDIP-FA_56	0.9769	0.174	5.6147	1.9685e-08	0.2275	0.0601	1.0004	0.0064	0.0068	0.0045	3.30817e-08
UDIP-FA_57	UDIP-FA_57	0.7883	0.1778	4.4338	9.2597e-06	0.2015	0.0539	0.9896	0.0062	0.0066	0.0045	1.04712e-05
UDIP-FA_58	UDIP-FA_58	1.0745	0.2542	4.2277	2.3606e-05	0.1468	0.0524	1.0109	0.0062	0.0116	0.0049	2.55029e-05
UDIP-FA_59	UDIP-FA_59	0.9406	0.1445	6.5118	7.4259e-11	0.279	0.0594	1.0028	0.0069	0.0019	0.0046	2.12415e-10
UDIP-FA_6	UDIP-FA_6	0.9033	0.1584	5.704	1.1702e-08	0.2253	0.0554	1.0003	0.0059	0.0051	0.005	2.08227e-08
UDIP-FA_60	UDIP-FA_60	1.2815	0.2336	5.4853	4.1277e-08	0.1808	0.0599	1.0106	0.0062	-0.0036	0.0045	6.47893e-08
UDIP-FA_61	UDIP-FA_61	0.8829	0.1251	7.0551	1.7248e-12	0.3075	0.0557	0.9885	0.0063	0.0033	0.0049	9.4864e-12
UDIP-FA_62	UDIP-FA_62	1.0655	0.125	8.5247	1.5315e-17	0.2945	0.0572	0.9989	0.0068	-0.0038	0.0046	6.75664e-16
UDIP-FA_63	UDIP-FA_63	0.9605	0.1319	7.2849	3.2186e-13	0.307	0.0539	0.9962	0.0064	0.0054	0.0045	2.16361e-12
UDIP-FA_64	UDIP-FA_64	1.0762	0.2014	5.3445	9.0659e-08	0.1752	0.0503	1.003	0.0061	0.0102	0.0048	1.32166e-07
UDIP-FA_65	UDIP-FA_65	1.0108	0.1559	6.4836	8.9573e-11	0.295	0.0643	1.0015	0.0068	0.0007	0.005	2.30603e-10
UDIP-FA_67	UDIP-FA_67	0.756	0.0919	8.2262	1.9323e-16	0.4165	0.0613	0.9876	0.0069	0.0113	0.0047	5.84521e-15
UDIP-FA_68	UDIP-FA_68	0.6382	0.145	4.4003	1.081e-05	0.2651	0.0544	0.9845	0.0064	0.0153	0.0045	1.20001e-05
UDIP-FA_69	UDIP-FA_69	0.9649	0.1401	6.8883	5.6471e-12	0.2346	0.0571	1.0078	0.0063	0.0045	0.0049	2.27766e-11
UDIP-FA_7	UDIP-FA_7	0.8473	0.1116	7.5907	3.1816e-14	0.3122	0.0612	1.0069	0.0065	0.0081	0.0051	2.74981e-13
UDIP-FA_70	UDIP-FA_70	1.0139	0.1893	5.3566	8.4803e-08	0.2626	0.0928	1.0024	0.0088	-0.0075	0.0051	1.25136e-07
UDIP-FA_71	UDIP-FA_71	0.9933	0.1419	6.9999	2.5621e-12	0.2419	0.0588	1.0093	0.0069	0.0016	0.0045	1.29173e-11
UDIP-FA_72	UDIP-FA_72	1.0534	0.2118	4.9738	6.5651e-07	0.2079	0.0578	0.9967	0.0065	0.0103	0.0045	8.36186e-07
UDIP-FA_73	UDIP-FA_73	0.8555	0.1569	5.4522	4.975e-08	0.1755	0.0527	1.012	0.0069	0.0067	0.0051	7.61994e-08
UDIP-FA_74	UDIP-FA_74	0.8789	0.1354	6.4898	8.5949e-11	0.248	0.0523	1.0013	0.0065	0.0147	0.0045	2.26083e-10
UDIP-FA_75	UDIP-FA_75	0.8361	0.1265	6.6094	3.8582e-11	0.2898	0.061	1.0006	0.0067	0.0022	0.0053	1.2019e-10
UDIP-FA_76	UDIP-FA_76	0.8867	0.132	6.7171	1.854e-11	0.2793	0.061	0.9988	0.0066	0.0052	0.005	6.06308e-11
UDIP-FA_78	UDIP-FA_78	1.1951	0.1731	6.9039	5.0583e-12	0.2092	0.0576	1.0118	0.0066	0.0062	0.0054	2.11053e-11
UDIP-FA_79	UDIP-FA_79	0.702	0.1774	3.9572	7.5824e-05	0.2097	0.0595	0.9972	0.0065	0.0049	0.005	8.04799e-05
UDIP-FA_8	UDIP-FA_8	0.7843	0.1551	5.0551	4.3025e-07	0.2684	0.0682	1	0.0075	0.0029	0.005	5.72091e-07
UDIP-FA_80	UDIP-FA_80	0.8125	0.1298	6.2602	3.8461e-10	0.2859	0.06	1.0023	0.0075	0.0102	0.0055	8.78072e-10
UDIP-FA_81	UDIP-FA_81	0.7873	0.1059	7.4311	1.0772e-13	0.3155	0.058	0.9941	0.0063	0.0091	0.005	7.66713e-13
UDIP-FA_82	UDIP-FA_82	1.0232	0.1898	5.3909	7.0096e-08	0.1925	0.0518	0.9998	0.0066	0.001	0.0044	1.04711e-07
UDIP-FA_83	UDIP-FA_83	0.9164	0.162	5.656	1.5494e-08	0.2038	0.0581	0.9955	0.0065	0.0054	0.0046	2.67825e-08
UDIP-FA_85	UDIP-FA_85	0.9792	0.1705	5.7434	9.2777e-09	0.2228	0.0561	1.006	0.0061	0.0055	0.0049	1.70091e-08
UDIP-FA_86	UDIP-FA_86	1.0106	0.1456	6.9405	3.9067e-12	0.2718	0.0641	1.0016	0.007	0.0042	0.0051	1.70934e-11
UDIP-FA_87	UDIP-FA_87	1.0414	0.1899	5.4832	4.1765e-08	0.2254	0.0681	1.0072	0.0068	0.0037	0.0052	6.47893e-08
UDIP-FA_88	UDIP-FA_88	1.1942	0.3203	3.7282	0.0002	0.127	0.0555	1.009	0.0064	0.0111	0.0052	0.000206838
UDIP-FA_89	UDIP-FA_89	0.947	0.109	8.6907	3.6033e-18	0.3676	0.0603	0.9972	0.0065	-0.0008	0.0049	4.35999e-16
UDIP-FA_9	UDIP-FA_9	1.1365	0.2144	5.3015	1.1485e-07	0.1682	0.0529	1.0054	0.0068	0.001	0.0048	1.63492e-07
UDIP-FA_90	UDIP-FA_90	0.8722	0.1109	7.8653	3.6836e-15	0.3142	0.0586	0.9903	0.0064	0.0096	0.0049	5.5846e-14
UDIP-FA_91	UDIP-FA_91	1.0423	0.1357	7.6808	1.5816e-14	0.2926	0.0576	1.0021	0.0067	-0.0049	0.005	1.59478e-13
UDIP-FA_92	UDIP-FA_92	1.0551	0.1386	7.6117	2.7047e-14	0.3752	0.0575	0.9899	0.0067	-0.0019	0.0045	2.51745e-13
UDIP-FA_93	UDIP-FA_93	1.1619	0.2176	5.3403	9.2817e-08	0.1648	0.0544	1.003	0.0065	-0.0028	0.0051	1.33701e-07
UDIP-FA_94	UDIP-FA_94	1.0881	0.1532	7.1006	1.2419e-12	0.2708	0.0621	0.9924	0.0068	5.8368e-05	0.0059	7.15571e-12
UDIP-FA_96	UDIP-FA_96	1.0619	0.2176	4.8805	1.0581e-06	0.1736	0.0562	1.0089	0.0066	0.0087	0.0045	1.30643e-06
UDIP-FA_97	UDIP-FA_97	1.2875	0.2769	4.6502	3.3164e-06	0.144	0.0566	1.0112	0.0063	0.0012	0.0045	3.97311e-06
UDIP-FA_98	UDIP-FA_98	0.8664	0.1384	6.262	3.7997e-10	0.2667	0.0538	1.0048	0.006	0.0095	0.0053	8.78072e-10
UDIP-FA_99	UDIP-FA_99	0.6601	0.1119	5.8973	3.6949e-09	0.3834	0.0562	0.9907	0.0061	0.0085	0.0052	7.45138e-09

## Sheet: Table S4
Table S4 | Lead SNPs identified in the multivariate GWAS of UDIP-FA in the discovery cohort
No	GenomicLocus	uniqID	rsID	chr	pos	p	nIndSigSNPs	IndSigSNPs
1	1	1:2798712:C:T	rs4373707	1	2798712	6.95014e-25	1	rs4373707
2	2	1:12546694:C:T	rs12125606	1	12546694	1.23685e-10	1	rs12125606
3	3	1:17319011:A:G	rs2076603	1	17319011	1.07905e-09	4	rs2076603;rs7550758;rs7513616;rs2311528
4	4	1:19968058:C:T	rs12408663	1	19968058	4.24418e-11	1	rs12408663
5	5	1:22444859:G:T	rs10753528	1	22444859	3.93976e-09	1	rs10753528
6	5	1:22447316:A:G	rs3765350	1	22447316	3.92373e-11	1	rs3765350
7	5	1:22711473:C:G	rs6426749	1	22711473	4.82838e-08	1	rs6426749
8	6	1:39629062:A:G	rs66531516	1	39629062	3.43222e-08	1	rs66531516
9	7	1:46595077:A:T	rs28482847	1	46595077	8.73043e-09	1	rs28482847
10	8	1:47902319:A:C	rs41290152	1	47902319	1.0971e-09	3	rs41290152;rs72688340;rs61784776
11	8	1:47980916:G:T	rs6658111	1	47980916	7.24946e-91	15	rs6658111;rs822886;rs72688340;rs12118339;rs114560258;rs2622925;rs61784776;rs6673882;rs12735320;rs497606;rs11211538;rs11211542;rs515146;rs10157710;rs12143164
12	8	1:47997658:C:G	rs512014	1	47997658	4.27863e-11	5	rs512014;rs515146;rs10157710;rs12143164;rs12118339
13	9	1:64230088:C:T	rs1495195	1	64230088	4.52513e-13	1	rs1495195
14	10	1:85915374:C:T	rs11801146	1	85915374	3.10798e-09	1	rs11801146
15	11	1:93570368:A:G	rs1474927	1	93570368	3.15352e-13	3	rs1474927;rs3754186;rs2624436
16	12	1:103214274:A:G	rs6577334	1	103214274	2.1472e-11	1	rs6577334
17	13	1:113196896:A:G	rs3790598	1	113196896	8.62486e-28	5	rs3790598;rs2999158;rs2279499;rs12138754;rs7519368
18	13	1:113244433:C:T	rs2279500	1	113244433	4.20721e-11	4	rs2279500;rs7519368;rs10745331;rs2999158
19	14	1:119446001:A:G	rs2282322	1	119446001	2.05584e-08	6	rs2282322;rs10923699;rs10923703;rs12408387;rs10923719;rs7555546
20	14	1:119458501:A:G	rs2645286	1	119458501	2.26885e-11	4	rs2645286;rs1779437;rs10923703;rs61806207
21	14	1:119641620:A:G	rs10923747	1	119641620	6.95783e-20	8	rs10923747;rs3936018;rs10923699;rs61806207;rs984222;rs12408387;rs1106529;rs10923719
22	15	1:149906413:C:T	rs11205303	1	149906413	3.64921e-14	2	rs11205303;rs1868992
23	15	1:150425941:C:T	rs17649760	1	150425941	2.41922e-09	2	rs17649760;rs6693567
24	16	1:155033308:A:G	rs11589479	1	155033308	2.86349e-15	10	rs11589479;rs4845706;rs79976845;rs6676150;rs4971079;rs75925257;rs28445596;rs61812092;rs79380792;rs6427128
25	17	1:171455322:C:T	rs34720381	1	171455322	8.17335e-10	1	rs34720381
26	18	1:180905694:C:T	rs3795503	1	180905694	3.82745e-14	1	rs3795503
27	19	1:197341901:A:G	rs76169311	1	197341901	1.94314e-09	1	rs76169311
28	20	1:205774897:C:T	rs823075	1	205774897	9.76415e-10	1	rs823075
29	21	1:215139887:A:T	rs1452628	1	215139887	9.52234e-36	3	rs1452628;rs76641944;rs562410
30	21	1:215160498:C:T	rs12123258	1	215160498	9.2372e-21	4	rs12123258;rs2601645;rs75277616;rs76641944
31	22	1:218968794:C:G	rs7547760	1	218968794	1.33164e-08	1	rs7547760
32	23	1:228133322:C:T	rs35799012	1	228133322	3.52867e-13	1	rs35799012
33	24	2:4563477:A:G	rs669952	2	4563477	1.18143e-10	1	rs669952
34	25	2:16430349:C:T	rs72772496	2	16430349	6.08762e-17	1	rs72772496
35	26	2:18702074:A:G	rs7579323	2	18702074	6.34312e-34	4	rs7579323;rs7577016;rs12465787;rs11096540
36	27	2:19363418:G:T	rs6723401	2	19363418	2.45335e-09	1	rs6723401
37	28	2:27291661:A:G	rs7575465	2	27291661	1.35908e-08	1	rs7575465
38	29	2:37079583:C:T	rs62132522	2	37079583	4.08737e-34	10	rs62132522;rs112844988;rs17497197;rs58370258;rs7558579;rs6544050;rs10206462;rs974967;rs13383778;rs4670629
39	30	2:42181679:A:T	rs6740960	2	42181679	1.43167e-08	1	rs6740960
40	30	2:42282829:A:C	rs11902166	2	42282829	5.17746e-11	2	rs11902166;rs11884781
41	31	2:45167570:G:T	rs83995	2	45167570	5.46049e-11	2	rs83995;rs544911
42	32	2:48322286:C:G	rs4953547	2	48322286	1.53438e-17	3	rs4953547;rs79939438;rs12473936
43	33	2:54615325:C:T	rs79272390	2	54615325	7.68519e-15	2	rs79272390;rs11898505
44	33	2:54797798:C:T	rs6734445	2	54797798	1.56919e-17	7	rs6734445;rs56320904;rs2941580;rs3850351;rs354222;rs6740110;rs17046344
45	34	2:56037076:C:T	rs1346781	2	56037076	2.32091e-09	1	rs1346781
46	35	2:58164435:C:T	rs2678890	2	58164435	1.0729e-12	3	rs2678890;rs72618694;rs78336587
47	36	2:60647456:A:T	rs149801367	2	60647456	1.81404e-08	1	rs149801367
48	37	2:65977031:C:G	rs6546176	2	65977031	2.32418e-79	6	rs6546176;rs6546180;rs11126056;rs12477112;rs10203155;rs1549022
49	37	2:66082334:A:G	rs2216970	2	66082334	6.68375e-09	1	rs2216970
50	38	2:71955772:C:T	rs2217222	2	71955772	2.03157e-27	5	rs2217222;rs1427687;rs13016025;rs2589513;rs57121650
51	39	2:105466005:A:G	rs1451533	2	105466005	9.25345e-09	3	rs1451533;rs62154962;rs1451534
52	40	2:119046519:C:T	rs11692600	2	119046519	8.73947e-10	1	rs11692600
53	40	2:119381569:A:G	rs498643	2	119381569	8.04966e-13	1	rs498643
54	41	2:134256134:A:G	rs7595258	2	134256134	2.70867e-08	1	rs7595258
55	42	2:145695907:A:G	rs1371044	2	145695907	1.22466e-13	2	rs1371044;rs1837294
56	43	2:162888055:C:T	rs2284871	2	162888055	5.4545e-11	1	rs2284871
57	44	2:188190475:A:G	rs13384908	2	188190475	2.85659e-22	6	rs13384908;rs3771081;rs16829016;rs3755248;rs144956220;rs16828714
58	45	2:200399053:C:T	rs6737075	2	200399053	1.05259e-12	3	rs6737075;rs6717968;rs62178735
59	45	2:200514753:A:C	rs4675752	2	200514753	5.38974e-10	1	rs4675752
60	46	2:204066671:A:G	rs112926099	2	204066671	1.34735e-08	1	rs112926099
61	47	2:210557542:A:G	rs741007	2	210557542	3.10485e-09	1	rs741007
62	48	2:217330901:C:T	rs7590302	2	217330901	1.54114e-09	5	rs7590302;rs284532;rs922987;rs4674093;rs284544
63	48	2:217431561:A:T	rs60603116	2	217431561	2.89917e-14	5	rs60603116;rs284544;rs284532;rs922987;rs4674093
64	49	2:218285112:C:G	rs1382434	2	218285112	1.35844e-10	1	rs1382434
65	50	2:218676890:C:T	rs1991161	2	218676890	4.63723e-09	1	rs1991161
66	51	2:223085955:G:T	rs2234675	2	223085955	5.35356e-09	1	rs2234675
67	52	2:239647672:A:G	rs74563367	2	239647672	2.24328e-09	1	rs74563367
68	53	3:25000664:A:G	rs12635833	3	25000664	2.19571e-10	1	rs12635833
69	54	3:37199453:A:G	rs2362824	3	37199453	9.26398e-09	1	rs2362824
70	55	3:48939080:A:G	rs4974084	3	48939080	3.07139e-11	3	rs4974084;rs9865051;rs7374375
71	56	3:52745087:C:T	rs11235	3	52745087	2.48858e-08	1	rs11235
72	57	3:55500408:A:T	rs10865994	3	55500408	1.83441e-09	1	rs10865994
73	58	3:57934652:C:T	rs268774	3	57934652	5.14176e-10	1	rs268774
74	59	3:66042247:C:T	rs28848789	3	66042247	8.0337e-29	4	rs28848789;rs28478459;rs28557048;rs111378052
75	60	3:66413918:A:G	rs2030569	3	66413918	7.39306e-11	2	rs2030569;rs17775391
76	61	3:71583177:A:G	rs35480566	3	71583177	2.14936e-19	5	rs35480566;rs830605;rs76929866;rs17108;rs17718831
77	62	3:77175484:A:G	rs7649370	3	77175484	3.70783e-08	1	rs7649370
78	63	3:88954981:A:G	rs9844567	3	88954981	4.42216e-08	1	rs9844567
79	63	3:89521693:C:T	rs35124509	3	89521693	3.3048e-45	14	rs35124509;rs78899834;rs7631244;rs6773817;rs73154904;rs112604674;rs4396913;rs138077070;rs9840763;rs62274614;rs11720651;rs1398534;rs6551410;rs2346836
80	64	3:94166264:A:T	rs34723757	3	94166264	3.40817e-08	1	rs34723757
81	65	3:104721473:A:G	rs74283894	3	104721473	2.5578e-20	5	rs74283894;rs1503080;rs2654247;rs12490814;rs6783013
82	66	3:113308412:A:G	rs12489267	3	113308412	4.99842e-08	1	rs12489267
83	67	3:124880511:C:G	rs628380	3	124880511	1.21866e-11	1	rs628380
84	68	3:132439403:A:C	rs11923081	3	132439403	7.45113e-10	3	rs11923081;rs80155922;rs546704947
85	69	3:138696439:C:T	rs9809852	3	138696439	4.22937e-23	2	rs9809852;rs360707
86	70	3:147040336:A:G	rs75404488	3	147040336	4.564e-10	3	rs75404488;rs80349887;rs12107172
87	70	3:147052282:C:T	rs62275345	3	147052282	6.82051e-25	7	rs62275345;rs62275346;rs80349887;rs1503738;rs4681358;rs1500866;rs9860691
88	70	3:147084749:A:T	rs35604858	3	147084749	6.60172e-09	4	rs35604858;rs4681358;rs2279830;rs9860691
89	70	3:147106319:C:T	rs2279829	3	147106319	4.13892e-50	13	rs2279829;rs12107172;rs2202285;rs56318686;rs17510517;rs1027695;rs924762;rs9839103;rs4417835;rs4376004;rs1503738;rs4681358;rs2279830
90	71	3:147804236:A:G	rs76036841	3	147804236	8.44025e-09	2	rs76036841;rs6770398
91	72	3:168969370:A:G	rs77683650	3	168969370	1.13359e-12	1	rs77683650
92	73	3:169295008:A:G	rs1965029	3	169295008	9.2671e-09	1	rs1965029
93	74	3:170984600:G:T	rs11927009	3	170984600	1.61775e-08	1	rs11927009
94	75	3:177310993:G:T	rs35614773	3	177310993	5.48626e-34	7	rs35614773;rs4857613;rs1466846;rs9880740;rs7613181;rs10470510;rs552757
95	76	3:190641682:A:G	rs147611663	3	190641682	3.54586e-16	2	rs147611663;rs12488471
96	76	3:190652830:C:T	rs34859790	3	190652830	2.00088e-49	3	rs34859790;rs9842514;rs12497975
97	77	3:194468413:C:T	rs6437412	3	194468413	2.3768e-09	1	rs6437412
98	78	4:1001742:C:T	rs10018140	4	1001742	3.41342e-09	1	rs10018140
99	79	4:4780454:C:T	rs75721280	4	4780454	3.65448e-09	1	rs75721280
100	80	4:7871623:A:G	rs7680747	4	7871623	6.27867e-09	1	rs7680747
101	81	4:38680015:A:G	rs13132853	4	38680015	3.32398e-08	1	rs13132853
102	82	4:48673683:G:T	rs6819193	4	48673683	2.3292e-11	1	rs6819193
103	83	4:53728355:C:T	rs116749252	4	53728355	1.97204e-13	3	rs116749252;rs11938159;rs881743
104	84	4:95135712:C:T	rs9307137	4	95135712	2.74555e-09	1	rs9307137
105	85	4:103188709:C:T	rs13107325	4	103188709	2.94827e-13	1	rs13107325
106	86	4:113404466:A:G	rs9684123	4	113404466	5.58784e-10	1	rs9684123
107	87	4:124111155:A:G	rs303120	4	124111155	3.26308e-08	2	rs303120;rs7689547
108	88	4:145395819:G:T	rs72731571	4	145395819	2.08789e-11	4	rs72731571;rs6845536;rs6835650;rs11724319
109	88	4:145659064:C:T	rs11727676	4	145659064	1.85229e-21	6	rs11727676;rs789351;rs75336464;rs116125427;rs11724319;rs1389029
110	88	4:145825151:A:G	rs951252	4	145825151	1.0391e-13	7	rs951252;rs789351;rs75336464;rs11733300;rs6845536;rs7692554;rs1389029
111	89	4:149460337:A:G	rs11937933	4	149460337	7.51911e-14	1	rs11937933
112	90	4:154765181:C:G	rs6846505	4	154765181	4.82605e-10	1	rs6846505
113	91	4:187390023:A:G	rs62348895	4	187390023	5.94434e-30	2	rs62348895;rs11730440
114	92	5:15712830:A:T	rs13173953	5	15712830	9.65324e-10	1	rs13173953
115	93	5:60196432:C:T	rs4647113	5	60196432	3.29387e-12	3	rs4647113;rs162244;rs12654306
116	94	5:67805272:C:T	rs10041403	5	67805272	5.30343e-09	1	rs10041403
117	95	5:72578158:C:G	rs10066689	5	72578158	1.03919e-08	1	rs10066689
118	96	5:81865645:A:T	rs2385882	5	81865645	7.26197e-11	1	rs2385882
119	97	5:82815170:A:G	rs61749613	5	82815170	2.90463e-10	1	rs61749613
120	98	5:91009752:A:G	rs331390	5	91009752	4.08238e-12	2	rs331390;rs331385
121	99	5:92187932:C:T	rs17669337	5	92187932	1.18623e-09	1	rs17669337
122	100	5:92797166:C:T	rs115877304	5	92797166	6.26762e-20	7	rs115877304;rs62369931;rs182780334;rs114072973;rs55923251;rs140597060;rs141532885
123	100	5:92947983:A:G	rs73135334	5	92947983	4.14254e-14	2	rs73135334;rs6867042
124	101	5:93908807:C:T	rs4869215	5	93908807	8.59952e-09	1	rs4869215
125	102	5:121821194:C:T	rs2407208	5	121821194	4.42486e-08	1	rs2407208
126	102	5:122260654:C:T	rs3897978	5	122260654	3.0195e-12	2	rs3897978;rs10041013
127	102	5:122467316:C:T	rs426500	5	122467316	2.52688e-10	1	rs426500
128	102	5:122489021:G:T	rs335141	5	122489021	6.30063e-09	1	rs335141
129	102	5:122493119:A:T	rs1685201	5	122493119	2.43764e-08	1	rs1685201
130	102	5:122750972:A:C	rs6595449	5	122750972	5.38607e-11	2	rs6595449;rs1428394
131	103	5:127874149:C:G	rs78821460	5	127874149	3.9109e-13	2	rs78821460;rs11241963
132	104	5:131585958:A:G	rs7701414	5	131585958	4.01823e-16	5	rs7701414;rs6860806;rs11739135;rs12523195;rs11242105
133	105	5:148663992:A:C	rs352358	5	148663992	8.00429e-12	1	rs352358
134	106	5:171096729:C:G	rs26341	5	171096729	1.49744e-11	2	rs26341;rs26409
135	106	5:171128464:C:T	rs6555969	5	171128464	1.46782e-32	5	rs6555969;rs171718;rs7734319;rs13184840;rs2879425
136	107	5:174158381:C:G	rs4647951	5	174158381	1.97028e-10	1	rs4647951
137	108	6:846436:C:G	rs9378508	6	846436	4.12042e-09	1	rs9378508
138	109	6:2423947:A:G	rs4959665	6	2423947	5.13358e-09	1	rs4959665
139	110	6:7146350:A:G	rs4960289	6	7146350	1.18785e-08	1	rs4960289
140	111	6:7906152:C:T	rs72829244	6	7906152	6.0187e-10	1	rs72829244
141	112	6:12466180:C:T	rs9381180	6	12466180	1.05709e-08	1	rs9381180
142	113	6:26463575:G:T	rs13195402	6	26463575	7.88143e-19	19	rs13195402;rs16891727;rs12209891;rs71557358;rs2770573;rs6940638;rs72842197;rs6456771;rs35454259;rs16897515;rs35789010;rs1184498;rs34027471;rs34661691;rs9467711;rs9467714;rs4711107;rs9379850;rs34565965
143	113	6:28306671:C:T	rs13217619	6	28306671	2.12195e-16	16	rs13217619;rs16894095;rs7766356;rs79124765;rs1233578;rs3132379;rs9257703;rs12179134;rs6928403;rs200991;rs200964;rs149855;rs34024998;rs9295768;rs1778482;rs853676
144	113	6:29549653:C:G	rs1233393	6	29549653	1.48791e-20	10	rs1233393;rs3095268;rs79124765;rs1233578;rs3132379;rs9257703;rs9257779;rs9257795;rs9257805;rs1233487
145	114	6:35012829:C:T	rs2820230	6	35012829	1.73543e-20	6	rs2820230;rs6457800;rs11758962;rs847852;rs2820232;rs2091074
146	115	6:39526895:C:T	rs6458117	6	39526895	2.02097e-36	12	rs6458117;rs9394613;rs9471130;rs725841;rs115029956;rs12206710;rs10456473;rs2026670;rs9471111;rs9296300;rs186390142;rs4714257
147	116	6:43826627:C:T	rs943080	6	43826627	1.62126e-22	5	rs943080;rs7742835;rs744103;rs9472134;rs4714704
148	117	6:44446919:A:C	rs7770012	6	44446919	3.56202e-15	1	rs7770012
149	117	6:44677332:A:G	rs227823	6	44677332	3.45587e-08	8	rs227823;rs227840;rs524492;rs7751298;rs112627708;rs113308638;rs56078331;rs1283923
150	117	6:44815483:C:T	rs13202672	6	44815483	1.66382e-26	16	rs13202672;rs544205695;rs7751298;rs36009150;rs1285033;rs73735344;rs112627708;rs113308638;rs9369561;rs2677105;rs56078331;rs1283923;rs227840;rs200182269;rs9395049;rs524492
151	117	6:45338703:C:T	rs17288320	6	45338703	3.36774e-11	5	rs17288320;rs9369561;rs12205657;rs9395049;rs524492
152	118	6:92002653:A:G	rs9345125	6	92002653	9.87126e-19	5	rs9345125;rs2144366;rs4707672;rs9351256;rs9345117
153	119	6:92796236:C:G	rs2452952	6	92796236	1.57478e-09	1	rs2452952
154	120	6:98549801:A:C	rs9401593	6	98549801	1.09291e-09	1	rs9401593
155	121	6:122581156:A:G	rs11756232	6	122581156	5.17686e-09	1	rs11756232
156	122	6:126069636:C:G	rs3757217	6	126069636	1.30238e-21	5	rs3757217;rs6922416;rs1832937;rs1268068;rs1268792
157	123	6:126781434:C:T	rs4895808	6	126781434	3.89298e-70	8	rs4895808;rs11759026;rs6569466;rs35848181;rs9388481;rs41285260;rs9401877;rs34539692
158	123	6:127105088:A:T	rs2021357	6	127105088	2.52771e-08	4	rs2021357;rs35848181;rs34539692;rs6569466
159	123	6:127182732:C:G	rs185867463	6	127182732	3.86264e-12	1	rs185867463
160	123	6:127451665:C:T	rs1936806	6	127451665	1.579e-09	1	rs1936806
161	123	6:127454893:A:G	rs72959041	6	127454893	1.30703e-09	1	rs72959041
162	124	6:131348045:C:T	rs17784896	6	131348045	3.17958e-14	3	rs17784896;rs6913822;rs7758804
163	125	6:133524284:A:G	rs6927143	6	133524284	3.45468e-19	9	rs6927143;rs3813346;rs6569874;rs9389064;rs954917;rs550153534;rs62430589;rs9389047;rs546329
164	125	6:133568151:C:T	rs511490	6	133568151	4.34412e-18	8	rs511490;rs6903443;rs6569874;rs954917;rs34366581;rs9389047;rs546329;rs3813346
165	126	6:136133659:C:T	rs947583	6	136133659	8.18274e-09	1	rs947583
166	126	6:136321545:A:G	rs11154841	6	136321545	1.15326e-10	2	rs11154841;rs12203398
167	127	6:138866268:C:T	rs9376354	6	138866268	6.26997e-18	5	rs9376354;rs6923270;rs9321661;rs11758715;rs6919935
168	128	6:149375716:C:G	rs13217006	6	149375716	4.13996e-08	1	rs13217006
169	129	6:150158194:G:T	rs4870049	6	150158194	2.0981e-08	1	rs4870049
170	130	6:157361601:G:T	rs62424285	6	157361601	3.93713e-09	1	rs62424285
171	131	7:2795957:A:G	rs798497	7	2795957	4.31269e-21	2	rs798497;rs798512
172	132	7:18819605:C:T	rs3901892	7	18819605	2.38603e-09	1	rs3901892
173	132	7:18904400:C:G	rs12700001	7	18904400	6.29316e-26	4	rs12700001;rs12530952;rs10261942;rs12699994
174	132	7:19021073:A:G	rs2717350	7	19021073	8.78668e-13	3	rs2717350;rs1859664;rs993083
175	132	7:19141259:A:G	rs17140672	7	19141259	3.20923e-09	1	rs17140672
176	132	7:19377631:C:T	rs2390085	7	19377631	1.77118e-08	1	rs2390085
177	132	7:19423005:A:G	rs16872232	7	19423005	2.01063e-09	1	rs16872232
178	132	7:19547949:A:G	rs6944632	7	19547949	2.70914e-17	6	rs6944632;rs4719563;rs61244356;rs2892936;rs73685918;rs6966911
179	132	7:19611307:G:T	rs10230207	7	19611307	5.01468e-82	8	rs10230207;rs2892936;rs4570042;rs6966911;rs4719563;rs61244356;rs6971655;rs2024353
180	132	7:19749440:A:C	rs6949635	7	19749440	7.27603e-10	1	rs6949635
181	133	7:28180556:C:T	rs864745	7	28180556	1.28432e-08	1	rs864745
182	134	7:29370180:A:G	rs35040169	7	29370180	2.49909e-09	1	rs35040169
183	135	7:33324104:G:T	rs6946608	7	33324104	4.00676e-30	9	rs6946608;rs2216031;rs17724206;rs1419912;rs2893469;rs3843532;rs1009355;rs73095390;rs2110765
184	136	7:38101935:C:T	rs1717730	7	38101935	5.60575e-18	3	rs1717730;rs4576334;rs1617794
185	137	7:43031154:A:C	rs986412	7	43031154	1.91102e-11	2	rs986412;rs10273260
186	138	7:81418596:G:T	rs10252734	7	81418596	8.06216e-14	2	rs10252734;rs6972704
187	139	7:83691792:C:G	rs2527042	7	83691792	2.21486e-08	1	rs2527042
188	140	7:84545818:C:G	rs7811476	7	84545818	2.32624e-12	4	rs7811476;rs10253019;rs6966472;rs34491764
189	141	7:96219460:A:G	rs7788173	7	96219460	1.166e-83	16	rs7788173;rs10464592;rs10240328;rs62470368;rs75928395;rs6957134;rs34619035;rs1524926;rs2724051;rs10429035;rs62470042;rs6965122;rs62470046;rs11765423;rs4360228;rs4615503
190	142	7:96652216:A:G	rs111564934	7	96652216	8.06909e-09	1	rs111564934
191	143	7:101044030:A:G	rs11772848	7	101044030	5.91651e-20	8	rs11772848;rs13245971;rs12112627;rs4729691;rs4729703;rs7807021;rs11772022;rs34487048
192	144	7:114147217:A:C	rs10279936	7	114147217	4.53865e-12	1	rs10279936
193	145	7:120795371:A:G	rs66871562	7	120795371	3.22283e-46	18	rs66871562;rs6971407;rs17356657;rs17284876;rs6967129;rs798914;rs2536149;rs798907;rs798903;rs2952559;rs1547960;rs2707520;rs6466766;rs12176609;rs12534510;rs11982438;rs12668590;rs35682088
194	145	7:120819114:C:T	rs28476487	7	120819114	1.69136e-12	6	rs28476487;rs798909;rs76042375;rs2110279;rs79162867;rs35682088
195	145	7:120963965:A:G	rs3757552	7	120963965	8.90592e-09	5	rs3757552;rs2536189;rs2536149;rs2952559;rs10254825
196	145	7:120966790:A:G	rs3779381	7	120966790	2.20475e-75	10	rs3779381;rs2536189;rs17284876;rs798907;rs1541509;rs17509082;rs1547960;rs2707520;rs76042375;rs10254825
197	145	7:120967213:A:T	rs2536192	7	120967213	2.13475e-17	8	rs2536192;rs2536189;rs35682088;rs13229558;rs1541509;rs11768439;rs2707520;rs10254825
198	145	7:121004989:A:G	rs73219303	7	121004989	1.19503e-10	5	rs73219303;rs798914;rs2707520;rs10254825;rs2536189
199	145	7:121017812:C:T	rs2952565	7	121017812	1.46717e-08	4	rs2952565;rs2707520;rs10254825;rs2536189
200	146	7:129685597:A:G	rs56179563	7	129685597	6.55459e-09	1	rs56179563
201	147	7:134392953:C:T	rs12707170	7	134392953	4.14686e-09	1	rs12707170
202	148	7:137116689:A:T	rs28493510	7	137116689	4.44904e-10	1	rs28493510
203	149	7:151498679:C:T	rs4128399	7	151498679	2.2103e-32	3	rs4128399;rs13224758;rs12703159
204	150	8:6387364:A:G	rs75313041	8	6387364	4.01095e-10	3	rs75313041;rs10503371;rs3020219
205	151	8:9090902:A:G	rs330060	8	9090902	2.86892e-21	46	rs330060;rs7843880;rs330037;rs4841124;rs10503387;rs330081;rs427731;rs35614264;rs11774915;rs4841139;rs11994201;rs9693857;rs34350025;rs10100760;rs13268319;rs35169606;rs2090061;rs17734690;rs615632;rs7816333;rs1484640;rs12678938;rs7004130;rs7017349;rs2980439;rs6601689;rs2979154;rs2976945;rs2980757;rs2921064;rs66818590;rs2409088;rs12682352;rs1821008;rs13274028;rs427370;rs7837026;rs11785268;rs13272451;…
206	151	8:10240202:G:T	rs9329221	8	10240202	2.71981e-17	39	rs9329221;rs6997515;rs1986972;rs11775625;rs7818307;rs11781592;rs10093774;rs2409665;rs10086521;rs7843470;rs11250098;rs10101292;rs28722721;rs11778398;rs2409714;rs2409721;rs6601575;rs3808502;rs10109537;rs4841139;rs11994201;rs9693857;rs34350025;rs10100760;rs13268319;rs35169606;rs2090061;rs17734690;rs615632;rs7816333;rs1484640;rs12678938;rs7004130;rs7017349;rs723609;rs4841317;rs11774474;rs147818026;rs…
207	151	8:11338146:A:G	rs1531576	8	11338146	1.33377e-15	34	rs1531576;rs2618451;rs10098664;rs34876360;rs35373084;rs13278965;rs34421088;rs17149412;rs10903343;rs55926829;rs1908814;rs7823808;rs11250186;rs4841669;rs11781592;rs10093774;rs2409665;rs10086521;rs7843470;rs11250098;rs10101292;rs28722721;rs11778398;rs2409714;rs2409721;rs6601575;rs3808502;rs10109537;rs9969423;rs4841527;rs7836059;rs13280447;rs34801597;rs936546
208	152	8:26453468:G:T	rs11990271	8	26453468	5.00006e-12	4	rs11990271;rs13249543;rs1899498;rs364508
209	153	8:49997998:A:G	rs78276527	8	49997998	4.58189e-08	1	rs78276527
210	154	8:60731440:A:T	rs10087957	8	60731440	5.01746e-09	1	rs10087957
211	155	8:71905587:G:T	rs1493202	8	71905587	3.70476e-10	1	rs1493202
212	156	8:72498067:C:T	rs150449323	8	72498067	1.73973e-11	3	rs150449323;rs10093418;rs13263939
213	157	8:74348353:C:T	rs2383893	8	74348353	4.54038e-10	2	rs2383893;rs4738367
214	158	8:88735337:C:T	rs6468996	8	88735337	2.90671e-10	1	rs6468996
215	159	8:108258263:A:G	rs201377623	8	108258263	4.7597e-09	1	rs201377623
216	159	8:108414618:C:T	rs1283690	8	108414618	3.24999e-22	6	rs1283690;rs1283673;rs1283672;rs4114169;rs2514866;rs1283703
217	160	8:108972055:C:T	rs629702	8	108972055	7.14288e-29	3	rs629702;rs684786;rs664170
218	161	8:119806645:C:T	rs34266810	8	119806645	5.20286e-11	4	rs34266810;rs10955912;rs9942821;rs17683860
219	161	8:119954484:C:T	rs10611942	8	119954484	9.61211e-34	9	rs10611942;rs1485303;rs7839059;rs4424296;rs3134036;rs3134076;rs2035977;rs10112995;rs10955912
220	162	8:120462633:A:G	rs146703659	8	120462633	1.12508e-09	1	rs146703659
221	162	8:120596023:A:G	rs10283100	8	120596023	1.03153e-15	1	rs10283100
222	162	8:120636850:A:G	rs6469835	8	120636850	4.52955e-19	7	rs6469835;rs1002850;rs1347278;rs2099395;rs714607;rs12544233;rs2875906
223	163	8:129951769:C:T	rs7815993	8	129951769	4.34445e-15	4	rs7815993;rs17242358;rs13272617;rs13266086
224	164	8:145002283:A:G	rs11993233	8	145002283	3.6129e-14	1	rs11993233
225	165	9:972163:C:G	rs399000	9	972163	1.85161e-08	2	rs399000;rs75785779
226	166	9:13949666:C:T	rs13283645	9	13949666	2.74586e-09	1	rs13283645
227	167	9:15764196:A:G	rs10733302	9	15764196	2.13247e-10	1	rs10733302
228	168	9:16681762:C:G	rs3850444	9	16681762	1.66324e-24	5	rs3850444;rs12335424;rs7044816;rs13285301;rs12685518
229	168	9:16833127:A:T	rs55763764	9	16833127	6.59732e-09	2	rs55763764;rs13285301
230	169	9:22381409:G:T	rs34254072	9	22381409	3.5861e-12	2	rs34254072;rs655497
231	170	9:35728494:A:G	rs4142495	9	35728494	1.58187e-08	1	rs4142495
232	171	9:83533159:C:T	rs113481766	9	83533159	2.06889e-08	2	rs113481766;rs12237461
233	172	9:92213967:A:G	rs1007966	9	92213967	1.57611e-08	1	rs1007966
234	173	9:95055429:A:T	rs10820966	9	95055429	1.4614e-09	1	rs10820966
235	174	9:96341324:G:T	rs10821162	9	96341324	4.71923e-08	1	rs10821162
236	175	9:98278413:C:T	rs113154802	9	98278413	2.22771e-17	4	rs113154802;rs28591501;rs75655735;rs80321314
237	175	9:98510231:A:G	rs817153	9	98510231	1.05705e-08	2	rs817153;rs10981996
238	176	9:101639827:G:T	rs7023465	9	101639827	1.85116e-11	2	rs7023465;rs911932
239	177	9:113633523:C:T	rs522422	9	113633523	5.5824e-11	2	rs522422;rs12555590
240	177	9:113677241:A:G	rs72748148	9	113677241	2.18836e-11	2	rs72748148;rs10980625
241	178	9:118930313:C:T	rs10759832	9	118930313	3.14053e-13	2	rs10759832;rs373915
242	178	9:119065043:C:T	rs35565319	9	119065043	2.04928e-31	2	rs35565319;rs148004436
243	178	9:119245183:A:G	rs7030607	9	119245183	2.41616e-18	6	rs7030607;rs35109285;rs11792948;rs10983203;rs4836757;rs1040851
244	179	9:129459314:C:T	rs34200683	9	129459314	6.31455e-14	3	rs34200683;rs7023938;rs7035405
245	180	9:136149229:C:T	rs505922	9	136149229	1.12952e-11	2	rs505922;rs635634
246	181	10:9207928:A:G	rs1149947	10	9207928	3.14042e-13	3	rs1149947;rs1342774;rs391733
247	182	10:21821918:A:T	rs12251016	10	21821918	8.83706e-20	5	rs12251016;rs12268489;rs2050905;rs10764328;rs12766229
248	183	10:31118096:C:T	rs2000099	10	31118096	3.06075e-13	1	rs2000099
249	184	10:33584131:C:T	rs6481844	10	33584131	4.88753e-08	1	rs6481844
250	184	10:33653931:A:G	rs74571939	10	33653931	9.93657e-11	2	rs74571939;rs76064346
251	185	10:48442894:A:G	rs17537178	10	48442894	3.864e-08	1	rs17537178
252	186	10:50313621:A:G	rs4509682	10	50313621	3.72209e-17	4	rs4509682;rs45563932;rs2943253;rs4445564
253	187	10:94941927:C:T	rs7916761	10	94941927	3.0937e-27	12	rs7916761;rs12778014;rs35708466;rs7070947;rs6583871;rs12775400;rs2797576;rs10882153;rs4918429;rs7915548;rs7905764;rs6583865
254	187	10:94945263:C:T	rs374000043	10	94945263	1.29708e-13	9	rs374000043;rs12778014;rs35708466;rs7070947;rs116896146;rs6583871;rs1927465;rs7915548;rs10882156
255	187	10:95032274:C:T	rs10882203	10	95032274	6.00065e-10	4	rs10882203;rs2797576;rs7070947;rs12775400
256	188	10:96014622:C:G	rs10786156	10	96014622	2.18671e-12	2	rs10786156;rs11187830
257	189	10:99903145:A:G	rs10736122	10	99903145	4.92876e-09	2	rs10736122;rs11189513
258	190	10:104230012:C:T	rs3808937	10	104230012	1.424e-09	2	rs3808937;rs12572775
259	190	10:104434209:A:G	rs1043450	10	104434209	6.69505e-14	4	rs1043450;rs2253950;rs12572775;rs10786679
260	191	10:105128134:G:T	rs10883859	10	105128134	4.1004e-09	2	rs10883859;rs12261058
261	191	10:105599770:G:T	rs11191822	10	105599770	1.41832e-08	1	rs11191822
262	192	10:118668477:A:T	rs2627194	10	118668477	9.64545e-22	6	rs2627194;rs10787751;rs1023549;rs9421249;rs2531688;rs11197843
263	193	10:119261119:G:T	rs10749242	10	119261119	1.92517e-10	4	rs10749242;rs740739;rs4642994;rs34306087
264	194	10:126431281:C:G	rs10901814	10	126431281	3.56225e-40	10	rs10901814;rs4962700;rs11245387;rs11245390;rs7907868;rs2247727;rs12251328;rs3802701;rs2061071;rs11245345
265	195	10:131440429:C:T	rs4751108	10	131440429	8.0574e-11	1	rs4751108
266	196	11:2169110:A:G	rs3741211	11	2169110	2.17584e-08	1	rs3741211
267	197	11:10674044:C:G	rs4910165	11	10674044	2.93348e-08	1	rs4910165
268	198	11:12071547:A:G	rs11022130	11	12071547	4.06986e-11	2	rs11022130;rs11022132
269	199	11:20129311:A:G	rs35891966	11	20129311	5.83157e-11	1	rs35891966
270	200	11:27328804:A:T	rs11029933	11	27328804	1.13757e-08	1	rs11029933
271	200	11:27367200:C:T	rs11029962	11	27367200	1.08929e-09	1	rs11029962
272	200	11:27468464:C:G	rs11030011	11	27468464	8.91956e-09	1	rs11030011
273	201	11:44171456:C:T	rs4551754	11	44171456	2.45058e-09	1	rs4551754
274	201	11:44330610:C:T	rs66716358	11	44330610	2.82818e-17	5	rs66716358;rs3845266;rs11037927;rs879238;rs2863058
275	201	11:44439181:C:T	rs1037737	11	44439181	2.56778e-09	2	rs1037737;rs1010381
276	202	11:46798631:A:G	rs6485690	11	46798631	8.38382e-10	1	rs6485690
277	203	11:74360635:C:G	rs7122810	11	74360635	4.24426e-08	1	rs7122810
278	204	11:92499681:A:G	rs3847526	11	92499681	2.02353e-08	1	rs3847526
279	205	11:95308854:A:T	rs11021221	11	95308854	6.87294e-12	1	rs11021221
280	205	11:95594301:A:G	rs1271744	11	95594301	2.99314e-08	1	rs1271744
281	206	11:100888602:A:T	rs581136	11	100888602	3.55571e-08	1	rs581136
282	207	11:110890363:C:T	rs317518	11	110890363	6.3806e-09	1	rs317518
283	207	11:110951985:A:G	rs1878536	11	110951985	2.13436e-27	5	rs1878536;rs10891224;rs1517581;rs10891230;rs4635115
284	207	11:111055661:A:G	rs12794347	11	111055661	3.97934e-23	5	rs12794347;rs61900578;rs949279;rs139327264;rs34077344
285	207	11:111068461:G:T	rs1607232	11	111068461	1.76904e-12	4	rs1607232;rs949279;rs10891230;rs61900578
286	208	11:130279168:C:T	rs7936928	11	130279168	5.66594e-24	3	rs7936928;rs11606448;rs4937514
287	208	11:130457883:A:G	rs6590483	11	130457883	2.57264e-12	3	rs6590483;rs1689229;rs34745291
288	208	11:130702454:C:T	rs4936118	11	130702454	6.76845e-09	1	rs4936118
289	209	12:1249250:A:G	rs721859	12	1249250	2.75398e-08	2	rs721859;rs11061730
290	210	12:28221974:A:G	rs6487659	12	28221974	6.79244e-10	7	rs6487659;rs10843084;rs10843088;rs10843091;rs805129;rs7978356;rs7303740
291	210	12:28290778:C:T	rs12229872	12	28290778	2.80912e-20	10	rs12229872;rs12813778;rs28378747;rs10771423;rs17434556;rs1533142;rs10843091;rs10492358;rs41525752;rs899504
292	210	12:28470084:C:T	rs9645730	12	28470084	2.62204e-42	15	rs9645730;rs10771423;rs17434556;rs1533142;rs11049719;rs10843209;rs7978356;rs10843084;rs11049327;rs722885;rs10843090;rs10843091;rs926150;rs899504;rs12813778
293	210	12:28662142:A:C	rs75351141	12	28662142	2.77833e-08	5	rs75351141;rs11049719;rs10843088;rs926150;rs10771423
294	211	12:32470788:G:T	rs9668328	12	32470788	7.92789e-11	2	rs9668328;rs10771942
295	212	12:49519185:A:G	rs7976890	12	49519185	1.79811e-09	2	rs7976890;rs6580699
296	213	12:53672634:G:T	rs2045473	12	53672634	2.5527e-10	1	rs2045473
297	214	12:54683639:A:T	rs55947153	12	54683639	3.69183e-08	1	rs55947153
298	215	12:65762058:C:G	rs12229918	12	65762058	5.48224e-14	6	rs12229918;rs10784455;rs61921502;rs11175789;rs2218069;rs10878265
299	215	12:65905126:C:T	rs79487293	12	65905126	4.61048e-43	4	rs79487293;rs17178006;rs61921502;rs11175789
300	216	12:78288811:C:T	rs2619062	12	78288811	1.29108e-21	7	rs2619062;rs78522504;rs11107247;rs17817928;rs1123680;rs770159;rs11107171
301	217	12:80048478:C:T	rs8176822	12	80048478	6.96002e-27	4	rs8176822;rs2430865;rs1312844;rs7980644
302	218	12:93993266:A:C	rs9634212	12	93993266	1.90165e-10	2	rs9634212;rs11107114
303	219	12:102328806:A:C	rs11111094	12	102328806	4.86427e-17	1	rs11111094
304	219	12:102924964:A:G	rs80076418	12	102924964	2.72381e-12	4	rs80076418;rs66521551;rs10860851;rs1996656
305	220	12:106381216:C:T	rs2436607	12	106381216	6.77882e-13	2	rs2436607;rs11112850
306	220	12:106454978:A:G	rs75436288	12	106454978	3.70836e-08	1	rs75436288
307	220	12:106476805:C:T	rs12146713	12	106476805	9.68786e-90	6	rs12146713;rs4964439;rs11112850;rs12369969;rs1427793;rs3741884
308	221	12:107052620:A:G	rs7958469	12	107052620	3.74099e-08	1	rs7958469
309	222	12:109167803:C:T	rs11114051	12	109167803	4.99517e-08	1	rs11114051
310	223	12:112007756:C:T	rs653178	12	112007756	6.19464e-15	2	rs653178;rs11065961
311	224	12:133688707:C:T	rs11147235	12	133688707	1.40763e-08	1	rs11147235
312	225	13:22991579:C:T	rs55736210	13	22991579	4.33208e-12	1	rs55736210
313	226	13:47224681:A:G	rs1747223	13	47224681	2.21219e-18	5	rs1747223;rs9534458;rs4942570;rs7319949;rs1570621
314	227	13:51164719:A:C	rs1239684	13	51164719	2.11796e-13	2	rs1239684;rs3118904
315	228	13:80191817:C:G	rs9545154	13	80191817	1.82789e-10	1	rs9545154
316	229	13:99635611:A:G	rs17785077	13	99635611	2.04296e-11	1	rs17785077
317	230	13:100393168:A:T	rs12584833	13	100393168	2.30638e-08	1	rs12584833
318	231	13:100999235:C:T	rs12867207	13	100999235	3.46519e-12	3	rs12867207;rs9518064;rs2254579
319	232	14:31375322:A:T	rs766146	14	31375322	4.24181e-13	1	rs766146
320	233	14:53964998:A:T	rs4901427	14	53964998	2.48916e-15	1	rs4901427
321	234	14:54417522:A:G	rs17563	14	54417522	3.04811e-16	4	rs17563;rs2738265;rs762642;rs7159662
322	234	14:54689764:A:C	rs7159652	14	54689764	6.63426e-14	5	rs7159652;rs7154152;rs7147119;rs1957638;rs1187426
323	234	14:54837930:A:G	rs35910668	14	54837930	2.86177e-12	1	rs35910668
324	235	14:59069053:G:T	rs221326	14	59069053	4.49841e-26	4	rs221326;rs10145711;rs160468;rs1103596
325	236	14:59603294:C:T	rs8004283	14	59603294	2.13933e-08	6	rs8004283;rs2053300;rs1252914;rs1252992;rs2757117;rs17095965
326	236	14:59628609:C:T	rs74826997	14	59628609	2.21117e-57	16	rs74826997;rs2053300;rs1252914;rs55760851;rs1252992;rs76558755;rs2757117;rs61984497;rs61984499;rs113284747;rs78091436;rs78601235;rs10151194;rs55643369;rs17255297;rs11158250
327	236	14:59778261:A:G	rs4898984	14	59778261	1.54627e-08	11	rs4898984;rs61984499;rs12590921;rs17255731;rs60675976;rs2053300;rs1252914;rs1252992;rs76558755;rs2757117;rs17095965
328	236	14:59880613:A:G	rs55863633	14	59880613	4.64992e-15	9	rs55863633;rs17255731;rs60675976;rs1252992;rs17095965;rs1253036;rs1253194;rs12590921;rs1253158
329	237	14:75429593:A:G	rs10162358	14	75429593	5.66003e-14	4	rs10162358;rs61979167;rs2111705;rs4899539
330	238	14:85716966:C:G	rs6574807	14	85716966	9.86327e-10	2	rs6574807;rs12896555
331	239	14:91964683:A:G	rs7153849	14	91964683	4.0282e-08	1	rs7153849
332	240	14:92427222:A:C	rs7153027	14	92427222	1.09186e-12	2	rs7153027;rs2295165
333	241	14:93094298:A:G	rs7141996	14	93094298	1.36047e-08	1	rs7141996
334	242	14:99750520:C:T	rs2664303	14	99750520	3.47216e-08	1	rs2664303
335	243	14:100283856:C:T	rs35522344	14	100283856	1.27182e-08	2	rs35522344;rs10151665
336	244	15:39377736:C:T	rs8026370	15	39377736	3.26782e-09	1	rs8026370
337	244	15:39576560:A:C	rs746265	15	39576560	1.62132e-09	5	rs746265;rs3973350;rs17621729;rs72722978;rs77470370
338	244	15:39625618:C:T	rs11070185	15	39625618	5.21363e-13	5	rs11070185;rs72722978;rs16968876;rs3973350;rs17621729
339	244	15:39633904:A:G	rs2033939	15	39633904	4.90594e-97	8	rs2033939;rs16968876;rs978740;rs4566132;rs77470370;rs3973350;rs17621729;rs72722978
340	245	15:48733097:A:G	rs12594618	15	48733097	1.76776e-08	1	rs12594618
341	246	15:58308254:A:C	rs2642632	15	58308254	1.00122e-51	11	rs2642632;rs12914590;rs17820966;rs4646571;rs2453280;rs8035107;rs12906402;rs12148525;rs7498008;rs79060358;rs4646616
342	247	15:63329601:G:T	rs62013179	15	63329601	1.26823e-09	1	rs62013179
343	248	15:68628163:C:T	rs2306022	15	68628163	2.16071e-20	3	rs2306022;rs17252387;rs7168069
344	249	15:84571836:A:T	rs8036748	15	84571836	1.29309e-13	7	rs8036748;rs2135877;rs2732162;rs2585058;rs7178271;rs11853949;rs143253231
345	250	15:88019374:C:T	rs2606160	15	88019374	1.21566e-10	2	rs2606160;rs1036810
346	251	15:91426560:A:G	rs4702	15	91426560	5.11921e-15	2	rs4702;rs6226
347	252	16:4339684:A:T	rs2387280	16	4339684	1.08015e-09	1	rs2387280
348	253	16:10778994:A:G	rs35911766	16	10778994	4.88066e-08	1	rs35911766
349	254	16:30141985:C:T	rs55732507	16	30141985	6.17562e-09	1	rs55732507
350	255	16:51181735:C:T	rs6416794	16	51181735	2.28505e-09	1	rs6416794
351	255	16:51442679:C:T	rs1948948	16	51442679	5.42353e-12	1	rs1948948
352	256	16:77326177:C:T	rs12929297	16	77326177	2.14653e-08	1	rs12929297
353	257	16:78209663:G:T	rs7501067	16	78209663	4.30771e-09	2	rs7501067;rs12930275
354	258	16:79158698:A:G	rs8045079	16	79158698	4.66089e-08	1	rs8045079
355	259	16:86609658:C:G	rs12445412	16	86609658	5.75116e-12	1	rs12445412
356	259	16:86714715:C:G	rs71390846	16	86714715	2.23109e-09	1	rs71390846
357	260	16:87184095:A:G	rs12051384	16	87184095	2.94913e-16	2	rs12051384;rs8057820
358	260	16:87207605:C:T	rs11647669	16	87207605	2.37628e-14	6	rs11647669;rs9783786;rs11864791;rs62056163;rs4843578;rs28695873
359	260	16:87225101:A:G	rs9937293	16	87225101	1.49425e-81	15	rs9937293;rs4240791;rs7500241;rs62056161;rs62056163;rs62056167;rs4843578;rs75675526;rs8061521;rs28758462;rs8050099;rs61284811;rs56744766;rs9783786;rs11864791
360	260	16:87357985:C:T	rs72804073	16	87357985	1.12328e-08	1	rs72804073
361	260	16:87360627:A:G	rs3748395	16	87360627	3.54742e-08	11	rs3748395;rs62056161;rs62056163;rs62056167;rs4843578;rs75675526;rs8061521;rs28758462;rs8050099;rs61284811;rs56744766
362	261	16:88292353:C:G	rs7499083	16	88292353	3.54947e-12	3	rs7499083;rs12447690;rs7204132
363	262	16:89939929:C:T	rs9939914	16	89939929	3.43949e-13	7	rs9939914;rs62052214;rs2241034;rs149082870;rs4313809;rs55911767;rs62056100
364	262	16:89991895:C:T	rs61356367	16	89991895	1.97599e-10	4	rs61356367;rs62052214;rs149082870;rs62056100
365	262	16:89992613:G:T	rs111398992	16	89992613	1.44999e-21	20	rs111398992;rs6500462;rs79029793;rs74837667;rs7192165;rs4785757;rs145943576;rs117306165;rs112579477;rs8063877;rs116918202;rs112067897;rs116885385;rs9673945;rs62068366;rs116853582;rs17226232;rs72807596;rs138044899;rs78498439
366	262	16:90043506:C:G	rs6500463	16	90043506	4.38555e-08	11	rs6500463;rs4785757;rs145943576;rs117306165;rs112579477;rs8063877;rs138044899;rs78498439;rs6500462;rs79029793;rs74837667
367	263	17:925304:A:G	rs2663349	17	925304	5.05205e-09	1	rs2663349
368	264	17:1966457:C:T	rs1048483	17	1966457	7.08654e-12	6	rs1048483;rs4790874;rs12449843;rs10852923;rs1466389;rs903158
369	264	17:2036162:A:G	rs2641443	17	2036162	6.44741e-17	7	rs2641443;rs12449843;rs10852923;rs1466389;rs9914266;rs9303272;rs8081273
370	264	17:2128865:A:G	rs75980353	17	2128865	4.0514e-18	6	rs75980353;rs8081273;rs1131600;rs12449843;rs10852923;rs1466389
371	265	17:9143864:A:G	rs1107361	17	9143864	1.42006e-11	1	rs1107361
372	266	17:19890237:A:G	rs9907752	17	19890237	3.58826e-11	1	rs9907752
373	267	17:27948844:C:T	rs3760456	17	27948844	1.08005e-38	5	rs3760456;rs3794730;rs370500262;rs62070270;rs62068576
374	268	17:35258114:C:T	rs8074144	17	35258114	1.44503e-11	1	rs8074144
375	269	17:40706273:A:C	rs676387	17	40706273	1.86968e-09	1	rs676387
376	270	17:42325073:A:G	rs12937114	17	42325073	1.61372e-09	1	rs12937114
377	271	17:43219666:A:G	rs137989694	17	43219666	2.16506e-11	4	rs137989694;rs7405472;rs12948326;rs3744760
378	271	17:43283523:C:T	rs117225566	17	43283523	2.2065e-08	3	rs117225566;rs2664008;rs12948326
379	271	17:43723929:A:G	rs364308	17	43723929	7.41707e-45	32	rs364308;rs1623865;rs1526123;rs113100008;rs9303521;rs7225384;rs11079711;rs12938031;rs34186148;rs4792880;rs4458044;rs242944;rs7220421;rs183086;rs9899833;rs8076152;rs1560313;rs242557;rs10514889;rs754593;rs6503453;rs2435211;rs713522;rs7225002;rs9908639;rs2458203;rs2696531;rs2696531;rs117642368;rs62064595;rs61572747;rs62065454
380	271	17:43798360:A:G	rs55938136	17	43798360	1.92018e-43	1	rs55938136
381	271	17:44121579:C:T	rs72836318	17	44121579	3.91434e-12	14	rs72836318;rs11870844;rs7225002;rs9908639;rs2458203;rs199470;rs147382204;rs183086;rs1560313;rs10514889;rs754593;rs6503453;rs2435211;rs713522
382	271	17:44787312:C:T	rs1378358	17	44787312	7.21428e-37	28	rs1378358;rs1563304;rs113100008;rs9303521;rs7225384;rs12938031;rs34186148;rs4792880;rs4458044;rs242944;rs7220421;rs183086;rs9899833;rs8076152;rs1560313;rs242557;rs10514889;rs754593;rs6503453;rs2435211;rs713522;rs7225002;rs9908639;rs2458203;rs2696531;rs2696531;rs199470;rs147382204
383	271	17:44794558:C:G	rs12951057	17	44794558	4.12688e-45	19	rs12951057;rs3933653;rs78033733;rs79553110;rs11079711;rs4458044;rs2664008;rs7220421;rs11079727;rs8076152;rs242557;rs35838379;rs754593;rs6503453;rs2435211;rs11870844;rs7225002;rs9908639;rs147382204
384	272	17:60982969:A:G	rs1019166	17	60982969	2.34678e-08	1	rs1019166
385	273	17:63914750:A:G	rs1420791	17	63914750	4.32633e-10	1	rs1420791
386	273	17:63926115:A:G	rs7224895	17	63926115	1.52191e-10	1	rs7224895
387	274	17:65968003:A:G	rs62086043	17	65968003	5.55584e-22	6	rs62086043;rs6504571;rs28580652;rs182991502;rs11650220;rs3936134
388	275	17:67629324:C:T	rs4556831	17	67629324	1.39956e-13	5	rs4556831;rs2189754;rs997284;rs12453895;rs9897105
389	275	17:68059706:C:G	rs78074080	17	68059706	5.60309e-29	3	rs78074080;rs180163;rs4411538
390	276	17:69985627:A:T	rs34050123	17	69985627	7.98096e-09	1	rs34050123
391	277	18:19376789:C:G	rs3017027	18	19376789	2.12096e-14	5	rs3017027;rs4426446;rs16961918;rs2850576;rs11662591
392	277	18:19665939:A:G	rs10153351	18	19665939	6.8264e-09	3	rs10153351;rs4426446;rs16961918
393	278	18:34045251:A:G	rs1790643	18	34045251	3.05978e-12	1	rs1790643
394	279	18:40244291:A:G	rs75741494	18	40244291	1.51704e-11	1	rs75741494
395	280	18:42444241:A:G	rs654269	18	42444241	9.5179e-12	1	rs654269
396	281	18:57386391:A:G	rs870472	18	57386391	4.85572e-16	2	rs870472;rs11661368
397	282	19:13109955:C:T	rs73006822	19	13109955	8.49337e-19	2	rs73006822;rs10403210
398	283	19:13934296:A:G	rs76549352	19	13934296	4.76449e-09	1	rs76549352
399	284	20:6475234:G:T	rs6038521	20	6475234	1.84032e-10	8	rs6038521;rs2876035;rs6054317;rs1321443;rs1884900;rs2145271;rs6038514;rs6117282
400	284	20:6604972:C:T	rs13038490	20	6604972	3.43156e-11	6	rs13038490;rs2145271;rs2876035;rs6054317;rs1321443;rs1884900
401	284	20:6613051:A:G	rs2024962	20	6613051	4.08905e-30	8	rs2024962;rs2145271;rs6038514;rs6117282;rs2876035;rs6054317;rs1321443;rs1884900
402	285	20:7118592:C:T	rs6054764	20	7118592	9.56313e-27	4	rs6054764;rs6117667;rs2013619;rs232657
403	286	20:10640042:C:T	rs17457340	20	10640042	1.23668e-08	1	rs17457340
404	286	20:10647679:A:G	rs1883801	20	10647679	2.2394e-11	2	rs1883801;rs6040095
405	286	20:10742071:C:T	rs41280286	20	10742071	1.72969e-09	1	rs41280286
406	287	20:11102180:A:G	rs59777125	20	11102180	1.35482e-08	1	rs59777125
407	287	20:11285932:A:G	rs6108906	20	11285932	3.37125e-18	3	rs6108906;rs2423565;rs6033091
408	288	20:15768237:A:G	rs10460644	20	15768237	4.29986e-08	1	rs10460644
409	289	20:21951847:A:G	rs2207878	20	21951847	2.47652e-11	4	rs2207878;rs201549;rs6113551;rs12479719
410	290	20:31175258:A:T	rs1555445	20	31175258	7.084e-09	1	rs1555445
411	291	20:34019579:C:T	rs224329	20	34019579	5.4003e-21	3	rs224329;rs34298551;rs6058247
412	292	20:36841756:C:T	rs1534967	20	36841756	1.29956e-14	1	rs1534967
413	293	20:38550395:C:G	rs6028721	20	38550395	1.60958e-10	2	rs6028721;rs17803745
414	294	20:46368566:A:C	rs62201715	20	46368566	3.94816e-08	1	rs62201715
415	295	20:52448936:C:G	rs6097618	20	52448936	1.16442e-13	3	rs6097618;rs6022757;rs6022781
416	296	20:61154871:C:T	rs6062264	20	61154871	1.0117e-10	1	rs6062264
417	297	21:39881848:C:T	rs9305650	21	39881848	5.18929e-09	1	rs9305650
418	298	22:30360915:A:G	rs4820824	22	30360915	2.31239e-08	1	rs4820824
419	299	22:30953295:C:T	rs2267161	22	30953295	3.85452e-10	1	rs2267161
420	300	22:40679199:C:T	rs6001861	22	40679199	7.7e-10	1	rs6001861

## Sheet: Table S5
Table S5 | Lead SNPs identified in the multivariate GWAS of UDIP-FA in the replication cohort
No	GenomicLocus	uniqID	rsID	chr	pos	p	nIndSigSNPs	IndSigSNPs
1	1	1:46324191:C:T	rs12751443	1	46324191	6.82611e-09	1	rs12751443
2	2	1:47980916:G:T	rs6658111	1	47980916	1.01382e-31	5	rs6658111;rs12118339;rs11211538;rs56034078;rs12143164
3	3	1:51314782:A:C	rs10888709	1	51314782	3.61338e-08	1	rs10888709
4	4	1:155095601:A:G	rs9330263	1	155095601	3.84394e-09	1	rs9330263
5	5	1:215141570:C:T	rs10494988	1	215141570	1.42777e-09	1	rs10494988
6	6	1:219849573:A:C	rs10779374	1	219849573	9.79636e-09	1	rs10779374
7	7	2:16430349:C:T	rs72772496	2	16430349	1.11501e-10	1	rs72772496
8	8	2:18702074:A:G	rs7579323	2	18702074	1.77911e-12	1	rs7579323
9	9	2:27168411:A:G	rs3769135	2	27168411	4.30301e-10	1	rs3769135
10	10	2:37152899:C:G	rs2372785	2	37152899	2.7048e-10	1	rs2372785
11	11	2:65975095:C:T	rs12713548	2	65975095	1.06635e-27	4	rs12713548;rs4671683;rs10203155;rs1549022
12	12	2:71954468:A:G	rs6760396	2	71954468	3.87363e-11	1	rs6760396
13	13	2:162866338:A:G	rs2909449	2	162866338	1.49835e-08	1	rs2909449
14	14	2:188190475:A:G	rs13384908	2	188190475	1.97463e-08	1	rs13384908
15	15	2:217431561:A:T	rs60603116	2	217431561	4.12198e-08	1	rs60603116
16	16	3:66047200:C:T	rs28550072	3	66047200	1.69149e-12	1	rs28550072
17	17	3:71503479:G:T	rs11707890	3	71503479	1.44067e-12	1	rs11707890
18	18	3:89530057:A:C	rs7650184	3	89530057	6.81649e-16	4	rs7650184;rs6793538;rs1840943;rs73139133
19	19	3:93537923:A:G	rs62266110	3	93537923	1.39504e-08	1	rs62266110
20	20	3:104674040:A:G	rs6788676	3	104674040	2.93663e-11	4	rs6788676;rs7618202;rs2062774;rs1503080
21	21	3:138696439:C:T	rs9809852	3	138696439	2.0651e-14	3	rs9809852;rs360711;rs360707
22	22	3:147106319:C:T	rs2279829	3	147106319	4.36939e-19	4	rs2279829;rs924762;rs1503738;rs9289747
23	23	3:177335249:C:T	rs9825151	3	177335249	5.04239e-15	5	rs9825151;rs552757;rs4857714;rs4857613;rs1466846
24	24	3:190657737:A:G	rs34306572	3	190657737	1.43388e-11	1	rs34306572
25	25	4:145597759:A:G	rs2055059	4	145597759	9.21075e-09	2	rs2055059;rs6845536
26	26	4:187390023:A:G	rs62348895	4	187390023	1.03777e-10	1	rs62348895
27	27	5:60141245:A:G	rs11740632	5	60141245	4.6439e-09	1	rs11740632
28	28	5:171128464:C:T	rs6555969	5	171128464	1.81423e-09	1	rs6555969
29	29	6:39531474:A:T	rs9369127	6	39531474	2.5788e-13	4	rs9369127;rs12525874;rs2446652;rs9394612
30	30	6:44680555:C:G	rs227830	6	44680555	6.61073e-14	5	rs227830;rs9369513;rs2139863;rs1402599;rs1321075
31	31	6:92002947:G:T	rs9359935	6	92002947	1.09757e-10	2	rs9359935;rs2144366
32	32	6:97947755:C:G	rs10499014	6	97947755	4.90009e-08	1	rs10499014
33	33	6:126732511:C:T	rs75343521	6	126732511	2.78102e-09	3	rs75343521;rs1337736;rs76470478
34	33	6:126803137:A:C	rs9375442	6	126803137	1.48632e-21	3	rs9375442;rs1337736;rs11759026
35	34	6:138872074:A:G	rs4131177	6	138872074	7.13462e-11	2	rs4131177;rs9399244
36	35	6:143395032:A:C	rs9403435	6	143395032	4.86951e-08	1	rs9403435
37	36	7:18911957:A:G	rs6951745	7	18911957	2.21384e-10	1	rs6951745
38	37	7:19619618:A:G	rs7786609	7	19619618	4.6368e-38	6	rs7786609;rs2390149;rs4719563;rs66587292;rs6461447;rs4570042
39	38	7:38114774:C:G	rs1717766	7	38114774	4.70399e-09	1	rs1717766
40	39	7:96215152:C:T	rs4278101	7	96215152	6.27955e-28	9	rs4278101;rs10464592;rs62470368;rs4729277;rs1524926;rs10250692;rs4490763;rs76173762;rs4360228
41	40	7:114096846:A:T	rs10231382	7	114096846	1.57121e-10	1	rs10231382
42	41	7:120873438:A:G	rs6965195	7	120873438	2.56549e-15	11	rs6965195;rs798914;rs2536150;rs798907;rs798903;rs17509082;rs1547959;rs2707520;rs10254825;rs1861000;rs35789132
43	41	7:120998277:G:T	rs3801382	7	120998277	1.4332e-32	7	rs3801382;rs798907;rs17509082;rs1547959;rs2707520;rs10254825;rs2536189
44	42	7:151498679:C:T	rs4128399	7	151498679	1.93949e-11	1	rs4128399
45	43	8:9083854:A:C	rs2929454	8	9083854	4.40266e-09	4	rs2929454;rs2945232;rs2030279;rs393155
46	44	8:11179458:G:T	rs3808502	8	11179458	9.72542e-10	1	rs3808502
47	45	8:26397896:C:T	rs11135939	8	26397896	4.96411e-10	2	rs11135939;rs429591
48	46	8:108393959:A:G	rs1654723	8	108393959	3.23589e-12	1	rs1654723
49	47	8:108972055:C:T	rs629702	8	108972055	9.39973e-15	2	rs629702;rs664170
50	48	8:120013090:C:T	rs13264791	8	120013090	1.95413e-08	1	rs13264791
51	49	9:118980297:A:G	rs418382	9	118980297	3.59794e-08	1	rs418382
52	49	9:119093757:A:G	rs72754266	9	119093757	6.08034e-09	1	rs72754266
53	50	10:50313621:A:G	rs4509682	10	50313621	1.80266e-08	1	rs4509682
54	51	10:126424823:A:G	rs4962692	10	126424823	4.32144e-08	1	rs4962692
55	52	11:95308854:A:T	rs11021221	11	95308854	2.47716e-08	1	rs11021221
56	53	11:110947521:A:T	rs73015136	11	110947521	4.22007e-17	2	rs73015136;rs1517578
57	53	11:111055661:A:G	rs12794347	11	111055661	4.7527e-10	2	rs12794347;rs34077344
58	54	12:28193582:A:G	rs10843074	12	28193582	1.20214e-08	5	rs10843074;rs11049308;rs10843077;rs11049329;rs10843091
59	54	12:28322218:A:G	rs11049390	12	28322218	1.04712e-18	9	rs11049390;rs61920563;rs11049587;rs4931083;rs1511549;rs11049308;rs10843077;rs11049329;rs10843091
60	54	12:28353782:A:G	rs201349622	12	28353782	7.5757e-09	3	rs201349622;rs11049587;rs4931083
61	55	12:53682326:A:G	rs1110720	12	53682326	2.71269e-08	1	rs1110720
62	56	12:65905126:C:T	rs79487293	12	65905126	1.28023e-17	1	rs79487293
63	57	12:79925802:A:G	rs11614730	12	79925802	1.49941e-08	1	rs11614730
64	58	12:102336310:C:T	rs4301837	12	102336310	3.30776e-10	1	rs4301837
65	58	12:102846020:A:G	rs11111278	12	102846020	7.39338e-09	1	rs11111278
66	59	12:106476805:C:T	rs12146713	12	106476805	5.70052e-44	4	rs12146713;rs73193841;rs12369969;rs1427793
67	60	14:53948461:A:G	rs1959826	14	53948461	2.12497e-08	1	rs1959826
68	61	14:54425052:A:C	rs2761887	14	54425052	2.88655e-09	1	rs2761887
69	62	14:59074878:C:T	rs160458	14	59074878	4.68371e-11	1	rs160458
70	63	14:59628679:A:G	rs76341705	14	59628679	3.98202e-29	6	rs76341705;rs893516;rs74874233;rs79999583;rs4898978;rs11158250
71	64	15:39377736:C:T	rs8026370	15	39377736	6.15793e-09	1	rs8026370
72	64	15:39634222:A:G	rs1080066	15	39634222	5.4754e-28	4	rs1080066;rs978740;rs34680120;rs8033007
73	65	15:58252277:C:T	rs4646635	15	58252277	7.05659e-18	5	rs4646635;rs4144005;rs2464469;rs7173078;rs12907038
74	66	15:68628163:C:T	rs2306022	15	68628163	3.98126e-08	1	rs2306022
75	67	16:2155297:A:G	rs9934488	16	2155297	1.26737e-08	1	rs9934488
76	68	16:87229344:A:C	rs56023709	16	87229344	2.83638e-35	8	rs56023709;rs4240791;rs1108048;rs62056161;rs12919133;rs4843576;rs62056167;rs12934042
77	69	17:2114063:A:T	rs59428454	17	2114063	5.77403e-15	6	rs59428454;rs28601570;rs12945198;rs2641431;rs11869619;rs10852923
78	70	17:27955540:C:T	rs3809790	17	27955540	6.37251e-09	1	rs3809790
79	71	17:43572419:C:T	rs56328224	17	43572419	1.05375e-16	8	rs56328224;rs7225384;rs9915721;rs713522;rs7225002;17:44222424_G_C;rs2696531;rs2696531
80	71	17:43798360:A:G	rs55938136	17	43798360	7.36912e-16	1	rs55938136
81	71	17:44310965:A:T	rs12452789	17	44310965	1.4177e-15	7	rs12452789;rs35937770;rs17698176;rs713522;rs2471738;rs7225002;17:44222424_G_C
82	71	17:44755729:A:C	rs141783865	17	44755729	1.90349e-13	10	rs141783865;rs35937770;rs7225384;rs9915721;rs713522;rs7225002;17:44222424_G_C;rs2696531;rs2696531;rs199470
83	72	17:68059706:C:G	rs78074080	17	68059706	7.59212e-11	1	rs78074080
84	73	18:19483942:A:G	rs12964162	18	19483942	1.34932e-09	1	rs12964162
85	74	20:6587524:C:T	rs6054385	20	6587524	3.88044e-12	1	rs6054385
86	75	20:36840156:C:T	rs6123471	20	36840156	3.64273e-15	1	rs6123471

## Sheet: Table S6
Table S6 | Lead SNPs identified in the meta‐multivariate GWAS of UDIP-FA
No	GenomicLocus	uniqID	rsID	chr	pos	p	nIndSigSNPs	IndSigSNPs
1	1	1:1689762:C:T	rs2235537	1	1689762	3.53665e-12	2	rs2235537;rs2803292
2	2	1:2146165:A:C	rs78265569	1	2146165	3.15441e-08	1	rs78265569
3	3	1:2798712:C:T	rs4373707	1	2798712	5.72535e-43	2	rs4373707;rs10910019
4	4	1:6807482:G:T	rs182166	1	6807482	8.66395e-10	2	rs182166;rs11122148
5	5	1:8503379:A:C	rs301817	1	8503379	5.83861e-11	2	rs301817;rs12075458
6	6	1:12546694:C:T	rs12125606	1	12546694	9.30653e-16	1	rs12125606
7	7	1:16607969:G:T	rs11260715	1	16607969	3.28417e-10	1	rs11260715
8	8	1:17303589:C:T	rs2235932	1	17303589	4.23522e-15	6	rs2235932;rs761422;rs2311528;rs6682671;rs3738814;rs9435672
9	9	1:19973920:A:G	rs2854108	1	19973920	4.36725e-20	3	rs2854108;rs4912109;rs2314331
10	10	1:22248466:C:T	rs6661141	1	22248466	4.82524e-11	1	rs6661141
11	10	1:22444859:G:T	rs10753528	1	22444859	4.86597e-15	1	rs10753528
12	10	1:22447316:A:G	rs3765350	1	22447316	5.89698e-18	4	rs3765350;rs55938609;rs3971300;rs12094994
13	10	1:22531542:A:G	rs79364962	1	22531542	4.29556e-08	4	rs79364962;rs55938609;rs3971300;rs12094994
14	10	1:22710877:C:G	rs34963268	1	22710877	5.91944e-16	3	rs34963268;rs11800051;rs1934481
15	11	1:23404671:A:G	rs4655145	1	23404671	6.45176e-14	3	rs4655145;rs61781469;rs1980991
16	11	1:23506969:A:G	rs11578642	1	23506969	6.19698e-09	1	rs11578642
17	12	1:38461821:C:T	rs67631072	1	38461821	8.09066e-10	1	rs67631072
18	13	1:39647620:C:T	rs112824904	1	39647620	9.12859e-12	2	rs112824904;rs72637908
19	14	1:43927877:A:G	rs2842197	1	43927877	1.12264e-10	1	rs2842197
20	15	1:46595077:A:T	rs28482847	1	46595077	2.34874e-17	4	rs28482847;rs2993263;rs12027345;rs1768809
21	16	1:47938405:G:T	rs61784813	1	47938405	6.15946e-11	3	rs61784813;rs61784776;rs72688340
22	16	1:47980916:G:T	rs6658111	1	47980916	2.40077e-150	17	rs6658111;rs2622925;rs61784776;rs10399673;rs12735320;rs580977;rs11211538;rs11211542;rs515146;rs55668525;rs1337526;rs12143164;rs72688340;rs12118339;rs529412;rs34762764;rs114560258
23	16	1:47997658:C:G	rs512014	1	47997658	8.45792e-19	6	rs512014;rs515146;rs1337526;rs12143164;rs6588406;rs12118339
24	17	1:51058495:A:T	rs9969991	1	51058495	9.38571e-17	6	rs9969991;rs2484683;rs12121630;rs144432213;rs35311109;rs12043819
25	17	1:51736056:C:G	rs7340084	1	51736056	2.36762e-09	3	rs7340084;rs144432213;rs17106409
26	18	1:53713549:A:G	rs11206127	1	53713549	2.34329e-08	1	rs11206127
27	19	1:63156043:A:G	rs1168114	1	63156043	6.88732e-09	1	rs1168114
28	20	1:64221345:A:C	rs2787681	1	64221345	6.29591e-21	4	rs2787681;rs2819159;rs11208285;rs672723
29	21	1:64636912:A:G	rs58161194	1	64636912	9.01362e-13	3	rs58161194;rs9970705;rs4477322
30	22	1:66092017:A:T	rs6588153	1	66092017	1.11689e-09	2	rs6588153;rs4655794
31	23	1:85915373:C:T	rs12726532	1	85915373	2.58099e-11	2	rs12726532;rs1146382
32	24	1:93952702:A:T	rs2624436	1	93952702	4.57249e-19	5	rs2624436;rs546445;rs1474927;rs3754186;rs1081522
33	25	1:103214274:A:G	rs6577334	1	103214274	8.83809e-14	3	rs6577334;rs2061705;rs9970114
34	25	1:103630080:A:T	rs12568878	1	103630080	8.29407e-09	4	rs12568878;rs2061705;rs9970114;rs1406127
35	26	1:110604747:A:G	rs2360635	1	110604747	1.56888e-08	2	rs2360635;rs2274568
36	27	1:113098534:C:T	rs6658555	1	113098534	9.32234e-18	3	rs6658555;rs2999158;rs35221527
37	27	1:113196896:A:G	rs3790598	1	113196896	2.54778e-29	3	rs3790598;rs12138754;rs2999158
38	28	1:118593983:C:T	rs10923481	1	118593983	1.44529e-08	1	rs10923481
39	28	1:118852975:C:T	rs12731372	1	118852975	2.32825e-09	1	rs12731372
40	28	1:119328610:C:T	rs10923680	1	119328610	9.67199e-13	7	rs10923680;rs12059868;rs2282322;rs10923703;rs12408387;rs878006;rs1341583
41	28	1:119450102:C:T	rs61806199	1	119450102	1.24874e-14	9	rs61806199;rs112724877;rs1779418;rs1779430;rs10923703;rs1155948;rs61806207;rs12034347;rs61807015
42	28	1:119523570:C:T	rs12088206	1	119523570	2.63436e-33	18	rs12088206;rs112724877;rs2282322;rs12026324;rs1779418;rs10923699;rs1155948;rs61806207;rs1409157;rs12408387;rs1106529;rs61806238;rs10923719;rs878006;rs6428792;rs1341583;rs3936018;rs61807015
43	29	1:149881173:A:C	rs55909843	1	149881173	4.95348e-11	6	rs55909843;rs1868992;rs6682495;rs112595055;rs142094124;rs41271951
44	29	1:149906413:C:T	rs11205303	1	149906413	1.21459e-18	2	rs11205303;rs1868992
45	29	1:150510660:C:T	rs6693567	1	150510660	1.40904e-12	4	rs6693567;rs834233;rs4971010;rs35427932
46	30	1:153775017:A:T	rs4077168	1	153775017	1.09745e-09	1	rs4077168
47	30	1:154026087:A:G	rs12726480	1	154026087	2.59392e-10	2	rs12726480;rs4446955
48	31	1:155033572:A:G	rs11264305	1	155033572	2.00587e-11	8	rs11264305;rs74677851;rs11589479;rs1870939;rs10908456;rs4745;rs4971093;rs140751929
49	31	1:155123837:C:G	rs6676150	1	155123837	4.00838e-25	13	rs6676150;rs74677851;rs11589479;rs1870939;rs10908456;rs79976845;rs4745;rs75925257;rs4971093;rs2990245;rs11264344;rs11264362;rs61812092
50	31	1:155175089:C:T	rs72704117	1	155175089	3.94024e-15	6	rs72704117;rs141942982;rs1611774;rs11580040;rs72706118;rs72708217
51	31	1:155931368:A:G	rs4661175	1	155931368	1.28814e-08	5	rs4661175;rs1611774;rs2990245;rs11264344;rs11264362
52	32	1:156907081:C:T	rs945508	1	156907081	3.15947e-09	2	rs945508;rs12137505
53	33	1:159903634:C:T	rs1320566	1	159903634	4.63681e-08	1	rs1320566
54	34	1:171455322:C:T	rs34720381	1	171455322	3.50111e-15	1	rs34720381
55	35	1:172283851:C:T	rs6684830	1	172283851	1.95512e-08	1	rs6684830
56	36	1:173780119:A:G	rs2144708	1	173780119	8.04091e-09	1	rs2144708
57	37	1:180905694:C:T	rs3795503	1	180905694	1.15501e-23	3	rs3795503;rs7515553;rs3795505
58	38	1:197321451:A:G	rs10922201	1	197321451	1.76461e-13	1	rs10922201
59	39	1:200707533:A:C	rs58397787	1	200707533	3.35851e-08	1	rs58397787
60	40	1:205012198:G:T	rs2071533	1	205012198	1.08554e-10	1	rs2071533
61	41	1:205736285:A:G	rs823152	1	205736285	3.70265e-12	1	rs823152
62	42	1:208024062:C:G	rs1204708	1	208024062	3.91971e-08	1	rs1204708
63	43	1:208424176:C:T	rs1781032	1	208424176	1.0574e-11	3	rs1781032;rs12135577;rs10779475
64	44	1:215139887:A:T	rs1452628	1	215139887	3.2091e-57	5	rs1452628;rs476557;rs78300504;rs12403837;rs2601634
65	44	1:215185552:C:T	rs2601645	1	215185552	7.31956e-26	7	rs2601645;rs78300504;rs12403837;rs544535;rs76164928;rs58723789;rs116044621
66	45	1:218833890:A:G	rs17048367	1	218833890	4.39251e-11	1	rs17048367
67	45	1:218973587:G:T	rs9431119	1	218973587	4.45042e-13	1	rs9431119
68	46	1:219846013:G:T	rs1856327	1	219846013	1.91022e-10	1	rs1856327
69	46	1:220290057:A:C	rs72747391	1	220290057	9.20538e-09	1	rs72747391
70	47	1:228133322:C:T	rs35799012	1	228133322	9.38559e-18	5	rs35799012;rs59657202;rs3121308;rs4653915;rs11800309
71	47	1:228179099:C:G	rs2527617	1	228179099	5.3706e-10	5	rs2527617;rs12086213;rs3121308;rs4653915;rs10916278
72	48	1:243852079:C:T	rs10927059	1	243852079	3.76701e-09	1	rs10927059
73	49	2:4563477:A:G	rs669952	2	4563477	1.63087e-13	1	rs669952
74	50	2:11529510:A:G	rs11683268	2	11529510	2.23614e-10	1	rs11683268
75	51	2:16430982:G:T	rs73215860	2	16430982	1.17802e-10	1	rs73215860
76	51	2:16508960:G:T	rs72774337	2	16508960	2.38232e-13	1	rs72774337
77	52	2:18702074:A:G	rs7579323	2	18702074	6.70542e-52	9	rs7579323;rs4119152;rs11096540;rs9677265;rs13403095;rs12993116;rs7577016;rs13031613;rs13431204
78	52	2:18709836:A:C	rs12612429	2	18709836	5.70834e-11	2	rs12612429;rs7577016
79	53	2:19181851:A:G	rs12616177	2	19181851	1.3617e-12	1	rs12616177
80	53	2:19383019:A:G	rs10171927	2	19383019	1.30181e-13	3	rs10171927;rs1866123;rs6723401
81	54	2:27177545:A:G	rs11902826	2	27177545	3.88669e-20	7	rs11902826;rs1371614;rs1124649;rs1866560;rs12470752;rs2384573;rs11121
82	55	2:32764922:C:T	rs6729952	2	32764922	1.18678e-09	2	rs6729952;rs1153122
83	56	2:37079583:C:T	rs62132522	2	37079583	8.66749e-54	15	rs62132522;rs7592382;rs28692629;rs11693564;rs10206462;rs12478822;rs13383778;rs4670629;rs112844988;rs17497197;rs58370258;rs3770770;rs11124556;rs7558579;rs13423928
84	57	2:37895784:A:C	rs12477217	2	37895784	2.56389e-10	1	rs12477217
85	58	2:42181679:A:T	rs6740960	2	42181679	3.65267e-18	5	rs6740960;rs4952535;rs13023914;rs1550429;rs4952588
86	58	2:42285575:A:T	rs2424	2	42285575	2.60381e-17	3	rs2424;rs35411295;rs7439
87	58	2:42510018:A:G	rs6736913	2	42510018	1.02995e-08	1	rs6736913
88	59	2:43620826:A:G	rs7566967	2	43620826	5.30053e-11	3	rs7566967;rs113542380;rs6729902
89	60	2:45167570:G:T	rs83995	2	45167570	4.00047e-17	5	rs83995;rs4953143;rs528483;rs539447;rs7568987
90	60	2:45397981:A:T	rs4952748	2	45397981	6.15564e-11	2	rs4952748;rs10181926
91	60	2:45461727:A:C	rs13022686	2	45461727	4.82108e-08	1	rs13022686
92	61	2:48288816:G:T	rs11891807	2	48288816	5.96085e-34	12	rs11891807;rs3136233;rs72811519;rs6750246;rs12473936;rs10495949;rs9677729;rs7574125;rs13003076;rs72820499;rs72872724;rs61283909
93	61	2:48725032:A:C	rs141998677	2	48725032	1.77189e-08	3	rs141998677;rs72872724;rs61283909
94	62	2:54615325:C:T	rs79272390	2	54615325	4.02655e-25	3	rs79272390;rs76179188;rs4417755
95	62	2:54683711:C:T	rs4305309	2	54683711	3.2941e-19	5	rs4305309;rs4417755;rs10194551;rs7565034;rs11896029
96	62	2:54862352:C:G	rs58419243	2	54862352	1.55134e-26	14	rs58419243;rs13033704;rs7600596;rs10205182;rs77456006;rs2971882;rs2007020;rs4671969;rs354222;rs56100737;rs35006042;rs2971888;rs17046344;rs72808623
97	62	2:54925874:C:G	rs112588445	2	54925874	6.01093e-15	7	rs112588445;rs2971882;rs2007020;rs4671969;rs354222;rs56100737;rs2971888
98	63	2:56110552:C:T	rs3791676	2	56110552	1.0859e-10	4	rs3791676;rs11887339;rs6761663;rs1430196
99	63	2:56135497:C:T	rs4233964	2	56135497	4.5123e-14	3	rs4233964;rs6761663;rs1430196
100	64	2:58130327:C:T	rs2678908	2	58130327	1.17698e-27	12	rs2678908;rs11688767;rs13016665;rs2716998;rs13392894;rs72808429;rs28583109;rs13018289;rs7596038;rs6706369;rs17398913;rs2215939
101	65	2:60647456:A:T	rs149801367	2	60647456	7.99896e-19	7	rs149801367;rs7593210;rs17028192;rs13019832;rs13024177;rs7599488;rs6709302
102	66	2:65977031:C:G	rs6546176	2	65977031	1.49168e-130	6	rs6546176;rs4671683;rs12614005;rs1549022;rs6546180;rs17528766
103	66	2:66090928:C:T	rs6708976	2	66090928	3.5751e-16	7	rs6708976;rs17528766;rs6744162;rs12995236;rs11894075;rs58378948;rs2553055
104	67	2:66536557:G:T	rs10166869	2	66536557	5.65351e-09	2	rs10166869;rs6752427
105	67	2:66651276:C:T	rs13007128	2	66651276	1.10683e-08	2	rs13007128;rs6752427
106	68	2:71779853:C:T	rs7599496	2	71779853	5.33369e-12	1	rs7599496
107	68	2:71804796:A:G	rs2419413	2	71804796	1.55387e-09	1	rs2419413
108	68	2:71956471:A:G	rs13018971	2	71956471	1.15048e-48	4	rs13018971;rs2589513;rs1365976;rs13022473
109	69	2:72741734:A:T	rs71337705	2	72741734	1.2221e-12	2	rs71337705;rs10460572
110	70	2:85490112:A:T	rs11126989	2	85490112	1.08894e-09	1	rs11126989
111	71	2:98428809:C:T	rs79170240	2	98428809	2.75963e-08	1	rs79170240
112	72	2:102334446:C:T	rs10177289	2	102334446	7.44504e-10	1	rs10177289
113	73	2:104155913:C:T	rs10191724	2	104155913	1.67358e-12	2	rs10191724;rs6707445
114	74	2:105406549:C:T	rs435454	2	105406549	6.05844e-13	3	rs435454;rs6714493;rs4851045
115	74	2:105496803:C:T	rs6714123	2	105496803	1.26379e-11	3	rs6714123;rs6714493;rs4851045
116	75	2:109951931:C:G	rs720978	2	109951931	1.17591e-11	1	rs720978
117	76	2:119038119:A:G	rs75862663	2	119038119	1.04095e-13	6	rs75862663;rs7573503;rs1400736;rs6542443;rs59028737;rs79147465
118	76	2:119045109:C:T	rs6728237	2	119045109	3.20083e-17	5	rs6728237;rs2422239;rs1400736;rs6542443;rs59028737
119	76	2:119426757:C:T	rs162755	2	119426757	1.93664e-20	3	rs162755;rs79396228;rs332108
120	76	2:119446085:A:G	rs10181336	2	119446085	7.72935e-10	2	rs10181336;rs332108
121	77	2:134256134:A:G	rs7595258	2	134256134	3.53904e-13	2	rs7595258;rs4954058
122	78	2:136884461:C:T	rs11679328	2	136884461	7.53128e-09	1	rs11679328
123	79	2:145678114:A:T	rs10928235	2	145678114	2.31998e-22	5	rs10928235;rs17407658;rs17408036;rs1371048;rs10201197
124	80	2:150009621:A:G	rs10490382	2	150009621	6.62157e-09	1	rs10490382
125	81	2:153303041:A:G	rs4664585	2	153303041	2.95245e-08	1	rs4664585
126	82	2:162888055:C:T	rs2284871	2	162888055	8.10817e-21	2	rs2284871;rs2909457
127	83	2:188190475:A:G	rs13384908	2	188190475	8.99698e-34	7	rs13384908;rs62173500;rs3771081;rs17464221;rs8176479;rs2192823;rs78925680
128	84	2:189899079:A:G	rs56339059	2	189899079	1.80794e-11	2	rs56339059;rs73980174
129	85	2:198187903:C:T	rs1560277	2	198187903	2.05424e-14	5	rs1560277;rs56116936;rs6728904;rs59007763;rs62277902
130	86	2:200450386:A:G	rs971324	2	200450386	1.3116e-14	8	rs971324;rs13033985;rs7559104;rs17265387;rs35731967;rs72933469;rs10184573;rs12693892
131	86	2:200492346:A:G	rs4673382	2	200492346	6.53598e-20	7	rs4673382;rs7559104;rs62178735;rs6435017;rs11684919;rs10184573;rs12693892
132	86	2:200514753:A:C	rs4675752	2	200514753	5.07663e-16	4	rs4675752;rs10184573;rs6741826;rs35586462
133	87	2:203543874:A:G	rs13023941	2	203543874	3.22001e-09	2	rs13023941;rs10207567
134	87	2:204158375:A:G	rs114863726	2	204158375	2.09986e-12	2	rs114863726;rs10207567
135	87	2:204298763:A:C	rs200542761	2	204298763	1.92429e-15	1	rs200542761
136	88	2:208334341:C:T	rs17810085	2	208334341	3.4528e-08	1	rs17810085
137	89	2:208691292:C:T	rs11679380	2	208691292	5.74194e-11	1	rs11679380
138	90	2:210557542:A:G	rs741007	2	210557542	4.49831e-13	2	rs741007;rs10174634
139	91	2:216245694:A:C	rs34923683	2	216245694	1.888e-12	1	rs34923683
140	92	2:217289515:A:G	rs2666290	2	217289515	1.30603e-10	8	rs2666290;rs7567366;rs480842;rs35404558;rs12624027;rs4550645;rs922987;rs4674093
141	92	2:217431561:A:T	rs60603116	2	217431561	3.16018e-26	9	rs60603116;rs7567366;rs480842;rs35404558;rs12624027;rs4550645;rs922987;rs874312;rs4674093
142	93	2:217881943:C:T	rs12614773	2	217881943	2.67241e-10	1	rs12614773
143	94	2:218288831:A:T	rs13428040	2	218288831	4.25649e-10	4	rs13428040;rs7602658;rs12990503;rs2568173
144	94	2:218588948:C:T	rs6436006	2	218588948	8.38973e-10	4	rs6436006;rs7602658;rs7589778;rs1430128
145	94	2:218676890:C:T	rs1991161	2	218676890	1.49283e-13	3	rs1991161;rs2161969;rs10188605
146	95	2:219994245:A:G	rs12694447	2	219994245	5.104e-09	1	rs12694447
147	96	2:221133176:C:T	rs1542356	2	221133176	1.73873e-09	1	rs1542356
148	96	2:221493188:A:G	rs1517447	2	221493188	1.59374e-08	1	rs1517447
149	97	2:223070676:C:T	rs77177529	2	223070676	6.38092e-09	1	rs77177529
150	97	2:223085955:G:T	rs2234675	2	223085955	7.23591e-13	1	rs2234675
151	98	2:226692507:C:T	rs112028523	2	226692507	1.42892e-11	1	rs112028523
152	99	2:239647672:A:G	rs74563367	2	239647672	4.99941e-16	1	rs74563367
153	100	3:25000664:A:G	rs12635833	3	25000664	1.07504e-16	4	rs12635833;rs6774983;rs73820369;rs4858675
154	100	3:25320960:C:T	rs17016141	3	25320960	8.6332e-10	1	rs17016141
155	101	3:37199453:A:G	rs2362824	3	37199453	1.15975e-12	1	rs2362824
156	101	3:37540192:A:T	rs267516	3	37540192	2.17485e-09	1	rs267516
157	102	3:39501312:A:G	rs1768234	3	39501312	9.83401e-10	2	rs1768234;rs694611
158	103	3:45765132:G:T	rs73058498	3	45765132	5.69563e-10	1	rs73058498
159	104	3:47029661:A:G	rs12152493	3	47029661	2.80753e-08	1	rs12152493
160	105	3:49334768:A:G	rs3774800	3	49334768	5.94125e-17	8	rs3774800;rs4858819;rs1264191;rs6799186;rs13084037;rs73073004;rs73074811;rs11710277
161	105	3:50210289:C:G	rs1005678	3	50210289	4.54776e-15	8	rs1005678;rs9827708;rs695238;rs2014830;rs13100903;rs7642934;rs73080980;rs2236947
162	106	3:52637486:C:G	rs2276824	3	52637486	3.31724e-13	7	rs2276824;rs353547;rs7614727;rs34736619;rs13303;rs4687546;rs7637082
163	107	3:55435943:A:G	rs1960758	3	55435943	9.14996e-11	2	rs1960758;rs10865994
164	107	3:55545914:C:T	rs73075478	3	55545914	9.1214e-12	2	rs73075478;rs10865994
165	108	3:57743246:A:G	rs1053711	3	57743246	1.06093e-11	4	rs1053711;rs13080460;rs268767;rs268771
166	109	3:64557634:C:T	rs9833903	3	64557634	4.55326e-10	1	rs9833903
167	110	3:66047196:A:G	rs28728070	3	66047196	2.3372e-48	5	rs28728070;rs73125793;rs28478459;rs28557048;rs80029872
168	110	3:66434643:C:T	rs2306272	3	66434643	9.18332e-20	3	rs2306272;rs782745;rs9827734
169	111	3:71150983:C:T	rs831435	3	71150983	2.23977e-15	2	rs831435;rs1288983
170	112	3:71578737:A:T	rs7624274	3	71578737	1.9861e-35	5	rs7624274;rs11720980;rs55863231;rs17718831;rs830605
171	113	3:73179767:G:T	rs73101602	3	73179767	2.15371e-10	2	rs73101602;rs13090213
172	113	3:73318499:C:T	rs71625926	3	73318499	8.02298e-09	1	rs71625926
173	114	3:77178156:A:G	rs12497306	3	77178156	7.97327e-14	3	rs12497306;rs7648530;rs7614752
174	115	3:88788675:C:T	rs1483476	3	88788675	2.52342e-08	3	rs1483476;rs11128058;rs12492486
175	115	3:88905003:A:G	rs1601111	3	88905003	1.15364e-11	7	rs1601111;rs6803220;rs11128058;rs1905346;rs12492486;rs2201640;rs10779990
176	115	3:89020740:C:G	rs113094392	3	89020740	2.8771e-08	3	rs113094392;rs12638746;rs35401223
177	115	3:89271917:A:C	rs9873281	3	89271917	1.90774e-13	11	rs9873281;rs4555526;rs2201640;rs9840763;rs62274614;rs7428438;rs9843199;rs6551407;rs9867299;rs12638746;rs6551410
178	115	3:89521693:C:T	rs35124509	3	89521693	2.33379e-76	20	rs35124509;rs62274614;rs6551407;rs9867299;rs12638746;rs1512908;rs6551410;rs1512183;rs58803696;rs9811816;rs35401223;rs78887877;rs6773817;rs73154904;rs113165984;rs55787722;rs73153376;rs9821024;rs9810980;rs138171634
179	116	3:93537923:A:G	rs62266110	3	93537923	8.88584e-16	4	rs62266110;rs73156375;rs73158005;rs62267030
180	117	3:98462525:A:G	rs7634817	3	98462525	3.3073e-08	1	rs7634817
181	117	3:98704236:A:G	rs2470854	3	98704236	2.39755e-10	1	rs2470854
182	118	3:104721473:A:G	rs74283894	3	104721473	7.84981e-37	9	rs74283894;rs6783013;rs13077489;rs11915534;rs9827968;rs77908862;rs4894897;rs1503080;rs9883267
183	118	3:104807520:A:T	rs2654422	3	104807520	1.44592e-08	8	rs2654422;rs6783013;rs11915534;rs9827968;rs77908862;rs4894897;rs1503080;rs9883267
184	119	3:113284162:G:T	rs12629879	3	113284162	3.61339e-13	1	rs12629879
185	120	3:114843510:A:G	rs6782656	3	114843510	6.37942e-11	3	rs6782656;rs7613560;rs13074263
186	121	3:124496529:C:T	rs62265637	3	124496529	3.77752e-08	1	rs62265637
187	121	3:124515876:A:G	rs3772832	3	124515876	2.68732e-12	1	rs3772832
188	122	3:124880511:C:G	rs628380	3	124880511	2.74041e-21	2	rs628380;rs11925247
189	123	3:132445904:A:C	rs77761150	3	132445904	2.07146e-10	4	rs77761150;rs79328618;rs546704947;rs572076167
190	123	3:132750851:A:T	rs6439383	3	132750851	2.4157e-08	1	rs6439383
191	123	3:132792253:A:G	rs13088897	3	132792253	2.34684e-10	1	rs13088897
192	124	3:135878634:C:T	rs35837273	3	135878634	2.0968e-09	1	rs35837273
193	125	3:138696439:C:T	rs9809852	3	138696439	1.54508e-46	4	rs9809852;rs360711;rs360707;rs1039944
194	126	3:141106954:A:T	rs13077048	3	141106954	2.46313e-09	1	rs13077048
195	127	3:147052282:C:T	rs62275345	3	147052282	1.89442e-38	11	rs62275345;rs75542880;rs1500866;rs75404488;rs2651311;rs12638416;rs11720889;rs13085449;rs1910466;rs1503738;rs4681358
196	127	3:147085092:A:C	rs12488094	3	147085092	5.27469e-12	10	rs12488094;rs1500866;rs2651311;rs11720889;rs13085449;rs1910466;rs1503738;rs4681358;rs2279830;rs10804720
197	127	3:147094222:A:G	rs7635829	3	147094222	1.02872e-14	9	rs7635829;rs2651311;rs11720889;rs13085449;rs1910466;rs1503738;rs4681358;rs2279830;rs3852000
198	127	3:147106319:C:T	rs2279829	3	147106319	2.4739e-82	16	rs2279829;rs75404488;rs12638416;rs1503738;rs4681358;rs2279830;rs3852000;rs12107172;rs55917553;rs12639260;rs74723862;rs17510517;rs78155705;rs4417835;rs4376004;rs10804720
199	128	3:147891874:C:T	rs77640487	3	147891874	3.49082e-11	2	rs77640487;rs6770398
200	129	3:148620128:G:T	rs6772643	3	148620128	8.48179e-10	2	rs6772643;rs9813166
201	130	3:153885503:C:T	rs357486	3	153885503	1.54511e-09	2	rs357486;rs1713827
202	131	3:156786544:A:G	rs11719102	3	156786544	1.07654e-09	1	rs11719102
203	132	3:168756827:A:G	rs9835833	3	168756827	9.98048e-12	4	rs9835833;rs17462202;rs62275495;rs17468398
204	132	3:168931496:A:G	rs12493816	3	168931496	2.84844e-08	1	rs12493816
205	132	3:168969370:A:G	rs77683650	3	168969370	7.81744e-16	2	rs77683650;rs76041641
206	132	3:168974061:A:G	rs1001078	3	168974061	2.85502e-09	1	rs1001078
207	133	3:169295755:A:C	rs16854109	3	169295755	1.99206e-14	3	rs16854109;rs57253035;rs16854211
208	133	3:169330871:C:T	rs7619166	3	169330871	1.00295e-11	1	rs7619166
209	134	3:170986411:A:G	rs6444974	3	170986411	1.06734e-17	3	rs6444974;rs4894700;rs6444975
210	135	3:177335305:A:G	rs9880740	3	177335305	9.23296e-61	9	rs9880740;rs4857611;rs112558670;rs11707809;rs552757;rs35614773;rs1466846;rs1965353;rs7613181
211	135	3:177396338:A:G	rs62283322	3	177396338	3.94015e-08	2	rs62283322;rs7613181
212	136	3:184233083:C:T	rs73179231	3	184233083	2.9722e-08	1	rs73179231
213	137	3:190641551:A:G	rs78362860	3	190641551	1.37096e-28	3	rs78362860;rs61634624;rs12488471
214	137	3:190652830:C:T	rs34859790	3	190652830	3.1049e-74	4	rs34859790;rs61634624;rs1393048;rs12497975
215	138	3:193515781:C:G	rs687610	3	193515781	2.64055e-09	1	rs687610
216	139	3:194472606:C:T	rs6777925	3	194472606	1.93087e-10	1	rs6777925
217	140	4:994154:C:T	rs3755957	4	994154	6.26726e-10	2	rs3755957;rs10010999
218	140	4:1002125:C:T	rs6855233	4	1002125	8.82169e-16	2	rs6855233;rs10010999
219	141	4:1757559:A:G	rs2896518	4	1757559	9.01153e-14	1	rs2896518
220	141	4:1797484:C:G	rs3135846	4	1797484	1.77811e-11	4	rs3135846;rs3135835;rs3135872;rs3135878
221	142	4:3241845:C:T	rs362307	4	3241845	2.22021e-08	1	rs362307
222	143	4:4780454:C:T	rs75721280	4	4780454	1.79937e-12	2	rs75721280;rs2172442
223	143	4:4867322:G:T	rs4464513	4	4867322	2.05987e-08	1	rs4464513
224	144	4:7871623:A:G	rs7680747	4	7871623	6.48214e-15	4	rs7680747;rs28394500;rs7689238;rs6846757
225	145	4:12863501:C:T	rs61177266	4	12863501	1.31055e-12	1	rs61177266
226	146	4:19095652:A:T	rs13115025	4	19095652	4.22408e-09	1	rs13115025
227	147	4:20119929:C:T	rs13118125	4	20119929	7.04918e-10	1	rs13118125
228	147	4:20286220:A:G	rs12233652	4	20286220	4.08036e-11	1	rs12233652
229	148	4:24373046:C:T	rs6848313	4	24373046	1.91361e-08	1	rs6848313
230	149	4:38680015:A:G	rs13132853	4	38680015	1.14305e-08	1	rs13132853
231	150	4:48600773:C:G	rs11933919	4	48600773	1.0786e-15	5	rs11933919;rs2354937;rs34730980;rs2247481;rs2605254
232	151	4:53728338:C:G	rs4864685	4	53728338	2.01734e-20	4	rs4864685;rs6554052;rs6838718;rs116749252
233	152	4:57773330:C:T	rs3806746	4	57773330	4.25698e-09	1	rs3806746
234	153	4:81952637:A:T	rs74764079	4	81952637	6.72707e-10	1	rs74764079
235	154	4:87498116:C:T	rs28653505	4	87498116	4.36684e-08	1	rs28653505
236	155	4:89050026:A:C	rs74904971	4	89050026	3.27664e-11	1	rs74904971
237	156	4:95135712:C:T	rs9307137	4	95135712	2.86761e-14	5	rs9307137;rs28678108;rs7658031;rs113575911;rs35744894
238	156	4:95439154:A:C	rs2639795	4	95439154	2.01017e-09	2	rs2639795;rs113575911
239	157	4:97950728:G:T	rs17247838	4	97950728	4.09276e-09	1	rs17247838
240	158	4:103188709:C:T	rs13107325	4	103188709	5.9093e-23	2	rs13107325;rs13126505
241	159	4:113404466:A:G	rs9684123	4	113404466	1.26319e-12	2	rs9684123;rs701760
242	160	4:124111155:A:G	rs303120	4	124111155	6.4353e-13	2	rs303120;rs7689547
243	161	4:127923157:A:C	rs17210317	4	127923157	1.40895e-09	1	rs17210317
244	162	4:145314014:G:T	rs11941227	4	145314014	3.33237e-17	7	rs11941227;rs55694701;rs12504628;rs6845536;rs11724319;rs2353397;rs11933087
245	162	4:145659064:C:T	rs11727676	4	145659064	1.29814e-28	8	rs11727676;rs11724319;rs6826476;rs2131354;rs11733546;rs11933087;rs813139;rs13148067
246	162	4:145662842:C:T	rs7666450	4	145662842	9.89392e-22	16	rs7666450;rs55694701;rs12504628;rs6845536;rs11724319;rs2353397;rs10011200;rs72733520;rs7340949;rs6826476;rs2131354;rs11933087;rs813139;rs62343137;rs13148067;rs11733300
247	163	4:146933473:A:C	rs6537391	4	146933473	1.52031e-09	1	rs6537391
248	164	4:149404854:C:T	rs11938874	4	149404854	3.78046e-24	3	rs11938874;rs902409;rs12644406
249	165	4:151520216:A:G	rs35879351	4	151520216	5.14633e-09	1	rs35879351
250	166	4:154767425:C:G	rs13131656	4	154767425	2.64395e-09	2	rs13131656;rs921884
251	167	4:159651881:A:G	rs13151920	4	159651881	3.72151e-09	2	rs13151920;rs6817602
252	168	4:167014954:A:G	rs56044927	4	167014954	1.27772e-08	1	rs56044927
253	169	4:187382294:A:C	rs12506228	4	187382294	8.60354e-13	4	rs12506228;rs72714110;rs6818710;rs11730440
254	169	4:187390023:A:G	rs62348895	4	187390023	8.60665e-55	6	rs62348895;rs76006284;rs72714110;rs6818710;rs11132396;rs11730440
255	170	5:2104336:A:T	rs11741353	5	2104336	4.03914e-08	1	rs11741353
256	171	5:15739051:C:T	rs4590179	5	15739051	4.12561e-20	4	rs4590179;rs4374757;rs4484432;rs11133824
257	172	5:31913006:A:G	rs58808503	5	31913006	9.91352e-11	1	rs58808503
258	173	5:44441703:A:G	rs1351637	5	44441703	5.69261e-15	1	rs1351637
259	174	5:53494465:G:T	rs368151677	5	53494465	3.36314e-09	1	rs368151677
260	175	5:56096029:C:T	rs13188599	5	56096029	7.93864e-11	1	rs13188599
261	176	5:59983635:C:G	rs140950438	5	59983635	6.85843e-12	6	rs140950438;rs1445893;rs79407584;rs4647113;rs71611678;rs4490539
262	176	5:60154424:C:T	rs7705121	5	60154424	5.13587e-20	13	rs7705121;rs26949;rs27565;rs248911;rs7381195;rs13158665;rs79407584;rs4647113;rs71611678;rs62366190;rs7446842;rs6868457;rs12188627
263	177	5:67805272:C:T	rs10041403	5	67805272	2.17994e-09	1	rs10041403
264	178	5:72206862:G:T	rs155625	5	72206862	5.79292e-10	1	rs155625
265	178	5:72578158:C:G	rs10066689	5	72578158	1.38132e-20	2	rs10066689;rs4533870
266	179	5:77782447:C:G	rs13157936	5	77782447	2.53289e-08	1	rs13157936
267	180	5:81865645:A:T	rs2385882	5	81865645	1.74182e-18	6	rs2385882;rs35326447;rs6872917;rs35314484;rs13182993;rs13176223
268	180	5:81966957:A:G	rs745648	5	81966957	1.08225e-18	2	rs745648;rs7449153
269	181	5:82810884:C:T	rs34580448	5	82810884	7.1571e-16	3	rs34580448;rs7737603;rs309592
270	181	5:82856519:C:T	rs309587	5	82856519	4.61053e-09	3	rs309587;rs7737603;rs309592
271	182	5:88107337:A:C	rs62380364	5	88107337	2.42112e-10	2	rs62380364;rs700592
272	182	5:88354675:C:T	rs10037512	5	88354675	8.86898e-09	1	rs10037512
273	183	5:89967158:A:G	rs11955565	5	89967158	2.64431e-08	1	rs11955565
274	184	5:91029327:A:G	rs1692435	5	91029327	1.71698e-17	3	rs1692435;rs7735764;rs2939244
275	185	5:91902326:C:T	rs10039860	5	91902326	1.46204e-17	2	rs10039860;rs10055226
276	185	5:92008479:C:T	rs62368475	5	92008479	1.05417e-13	2	rs62368475;rs1501916
277	185	5:92048984:C:T	rs1532695	5	92048984	6.06076e-10	2	rs1532695;rs1501916
278	185	5:92186429:G:T	rs888814	5	92186429	3.45561e-18	6	rs888814;rs27540;rs4869325;rs1117022;rs1363291;rs6895635
279	185	5:92482226:A:G	rs4242239	5	92482226	4.26016e-08	2	rs4242239;rs4869325
280	185	5:92797166:C:T	rs115877304	5	92797166	7.82816e-36	5	rs115877304;rs151134227;rs62369931;rs116509069;rs55923251
281	185	5:92943487:C:T	rs74489452	5	92943487	3.75443e-23	4	rs74489452;rs12188905;rs10064431;rs3940842
282	185	5:93189083:C:T	rs140550035	5	93189083	2.72542e-11	4	rs140550035;rs56111638;rs10064431;rs7735435
283	186	5:93908807:C:T	rs4869215	5	93908807	1.75504e-12	1	rs4869215
284	187	5:106917475:A:G	rs12153493	5	106917475	4.26599e-08	2	rs12153493;rs2005103
285	188	5:112054547:A:T	rs9326862	5	112054547	2.7914e-13	3	rs9326862;rs2229992;rs153560
286	188	5:112383796:C:T	rs6894937	5	112383796	2.74662e-09	3	rs6894937;rs153560;rs9326869
287	189	5:115922151:A:G	rs6898172	5	115922151	5.38455e-15	1	rs6898172
288	190	5:116722172:C:T	rs2263587	5	116722172	1.57734e-09	1	rs2263587
289	191	5:121636440:C:T	rs1421881	5	121636440	2.65032e-08	3	rs1421881;rs56142133;rs2117358
290	191	5:121813744:C:T	rs304373	5	121813744	6.68681e-11	2	rs304373;rs304391
291	191	5:121821194:C:T	rs2407208	5	121821194	3.08399e-18	4	rs2407208;rs56142133;rs304391;rs2117358
292	191	5:121969737:A:G	rs35495400	5	121969737	1.44903e-08	1	rs35495400
293	191	5:122248172:C:G	rs28878174	5	122248172	1.24964e-19	15	rs28878174;rs35949793;rs898390;rs12659402;rs12516444;rs75354146;rs4836191;rs9327273;rs79712793;rs10066638;rs193542;rs6595428;rs4262105;rs189190;rs66501867
294	191	5:122446619:A:C	rs151283	5	122446619	1.1008e-17	10	rs151283;rs35949793;rs75354146;rs4836191;rs6595428;rs186749;rs335170;rs335211;rs335178;rs10061587
295	191	5:122493119:A:T	rs1685201	5	122493119	6.41588e-17	8	rs1685201;rs79712793;rs189190;rs335170;rs189189;rs335211;rs7702622;rs12658966
296	191	5:122501419:C:T	rs72787559	5	122501419	5.33486e-09	4	rs72787559;rs4262105;rs66501867;rs335211
297	191	5:122609853:C:G	rs77097530	5	122609853	4.54156e-18	2	rs77097530;rs115968765
298	191	5:122731568:C:G	rs6860168	5	122731568	1.2257e-15	5	rs6860168;rs115968765;rs12658966;rs6881176;rs4466161
299	191	5:123101053:G:T	rs13182013	5	123101053	3.15513e-09	3	rs13182013;rs4466161;rs257014
300	192	5:127859713:C:G	rs79036560	5	127859713	6.39224e-24	7	rs79036560;rs115852348;rs10057405;rs75138601;rs17839642;rs6595843;rs112125261
301	193	5:128922574:G:T	rs76244727	5	128922574	1.58092e-09	1	rs76244727
302	193	5:129218128:C:T	rs33911	5	129218128	4.2113e-08	1	rs33911
303	194	5:129926042:C:T	rs72797733	5	129926042	7.50558e-10	1	rs72797733
304	194	5:131559199:A:T	rs4705849	5	131559199	4.10337e-25	14	rs4705849;rs13157685;rs12523195;rs4705915;rs247217;rs40401;rs168681;rs11741341;rs404771;rs274555;rs2073644;rs13190001;rs6894249;rs10900809
305	195	5:132433618:A:T	rs4705880	5	132433618	1.24872e-09	1	rs4705880
306	196	5:139037130:A:G	rs28421137	5	139037130	3.25075e-13	2	rs28421137;rs356484
307	197	5:139517197:C:T	rs185123	5	139517197	5.54064e-09	2	rs185123;rs60601725
308	198	5:148663992:A:C	rs352358	5	148663992	2.37456e-14	2	rs352358;rs352360
309	199	5:151198750:A:G	rs2964612	5	151198750	4.25748e-11	1	rs2964612
310	200	5:158271680:C:T	rs17056301	5	158271680	8.87621e-10	2	rs17056301;rs55816233
311	201	5:171096729:C:G	rs26341	5	171096729	3.38395e-22	4	rs26341;rs254926;rs26410;rs33378
312	201	5:171128464:C:T	rs6555969	5	171128464	1.29208e-50	7	rs6555969;rs2879425;rs34467172;rs171718;rs7734319;rs13184840;rs3822730
313	202	5:174157096:A:G	rs2381939	5	174157096	8.37772e-17	1	rs2381939
314	203	5:179034260:A:G	rs4701140	5	179034260	8.55882e-10	2	rs4701140;rs56370020
315	204	5:179557156:A:C	rs11249671	5	179557156	3.40464e-09	4	rs11249671;rs2386701;rs11738004;rs11738961
316	205	6:846436:C:G	rs9378508	6	846436	4.06438e-08	2	rs9378508;rs36078286
317	206	6:2423947:A:G	rs4959665	6	2423947	1.45377e-13	2	rs4959665;rs4959652
318	207	6:7157040:C:T	rs17603736	6	7157040	1.4954e-10	1	rs17603736
319	207	6:7232389:C:T	rs75757892	6	7232389	8.05902e-11	1	rs75757892
320	208	6:7706545:A:G	rs6909130	6	7706545	7.55378e-09	3	rs6909130;rs7756651;rs12212270
321	208	6:7736417:C:G	rs199205	6	7736417	4.44299e-10	2	rs199205;rs12212270
322	208	6:7898147:A:G	rs73719371	6	7898147	1.14415e-11	2	rs73719371;rs72829248
323	209	6:12466180:C:T	rs9381180	6	12466180	1.37707e-11	2	rs9381180;rs9369375
324	210	6:15483335:G:T	rs9383062	6	15483335	2.15024e-08	1	rs9383062
325	211	6:18020433:A:G	rs76091407	6	18020433	3.78918e-09	1	rs76091407
326	212	6:25874423:A:G	rs13198474	6	25874423	2.49909e-16	10	rs13198474;rs6900762;rs7749823;rs11966360;rs9379850;rs9379862;rs2237235;rs9368450;rs2451729;rs71557353
327	212	6:26200677:A:G	rs806794	6	26200677	1.97987e-15	5	rs806794;rs9379827;rs72834698;rs806790;rs7773004
328	212	6:26915439:G:T	rs374577630	6	26915439	3.92276e-27	19	rs374577630;rs7749823;rs7773004;rs11966360;rs9379850;rs9379862;rs2237235;rs9368450;rs2451729;rs71557353;rs12203454;rs72842197;rs3800316;rs16897515;rs726830;rs9366698;rs12179134;rs200991;rs200964
329	212	6:27886051:A:G	rs6908688	6	27886051	3.38935e-09	8	rs6908688;rs12203454;rs9366698;rs200964;rs536704;rs72844224;rs4711173;rs79124765
330	212	6:28115367:A:T	rs4713147	6	28115367	7.6176e-10	3	rs4713147;rs3800328;rs13217047
331	212	6:28368508:C:G	rs35883476	6	28368508	1.65716e-29	15	rs35883476;rs726830;rs9366698;rs12179134;rs200991;rs200964;rs536704;rs9295768;rs3800328;rs13217047;rs79124765;rs1233578;rs3117426;rs9257779;rs9257795
332	212	6:29549653:C:G	rs1233393	6	29549653	1.33445e-34	10	rs1233393;rs13217047;rs79124765;rs1233578;rs3117426;rs9257779;rs9257795;rs1233487;rs1233478;rs29218
333	213	6:33599979:C:T	rs13192436	6	33599979	4.43595e-08	1	rs13192436
334	214	6:35009803:A:G	rs72896273	6	35009803	4.44639e-08	2	rs72896273;rs13213103
335	214	6:35012829:C:T	rs2820230	6	35012829	2.6133e-29	6	rs2820230;rs11758962;rs2820232;rs2091074;rs707967;rs13213103
336	214	6:35406903:A:G	rs4713860	6	35406903	1.26995e-08	3	rs4713860;rs2091074;rs13213103
337	215	6:39526867:A:G	rs1520	6	39526867	6.99213e-59	13	rs1520;rs2026670;rs9369119;rs9462553;rs4714257;rs9394613;rs9471130;rs725841;rs115029956;rs115227912;rs12206710;rs10456473;rs2954711
338	216	6:43826627:C:T	rs943080	6	43826627	9.4358e-31	5	rs943080;rs744103;rs6926462;rs9472136;rs4714704
339	216	6:43868986:A:G	rs1539508	6	43868986	8.9646e-10	1	rs1539508
340	217	6:44446919:A:C	rs7770012	6	44446919	1.08121e-25	2	rs7770012;rs12154055
341	217	6:44800015:C:T	rs542444	6	44800015	1.23885e-51	16	rs542444;rs56078331;rs1767799;rs630958;rs227818;rs12529132;rs227823;rs35497646;rs35265671;rs9472376;rs544205695;rs10948186;rs12529990;rs7760008;rs1321076;rs113308638
342	217	6:44884749:A:G	rs2249560	6	44884749	1.17548e-08	4	rs2249560;rs1767799;rs227823;rs7760008
343	217	6:45236707:G:T	rs10948221	6	45236707	3.82541e-20	11	rs10948221;rs835941;rs1482883;rs630958;rs12529132;rs9472376;rs10948186;rs10948196;rs9395082;rs17288390;rs2677102
344	217	6:45350890:A:G	rs112627708	6	45350890	2.42532e-15	7	rs112627708;rs6911254;rs56078331;rs227823;rs7751298;rs1321076;rs113308638
345	218	6:45887313:A:G	rs1361214	6	45887313	2.64886e-08	1	rs1361214
346	219	6:51574933:A:G	rs9367447	6	51574933	5.64204e-15	1	rs9367447
347	220	6:80978943:A:G	rs667097	6	80978943	2.20463e-08	1	rs667097
348	220	6:81308727:C:T	rs9449091	6	81308727	3.66504e-08	1	rs9449091
349	221	6:85065108:C:G	rs9449871	6	85065108	8.95741e-13	3	rs9449871;rs7775532;rs9359589
350	222	6:85513783:A:G	rs215918	6	85513783	4.0885e-08	1	rs215918
351	223	6:92002653:A:G	rs9345125	6	92002653	1.03149e-41	9	rs9345125;rs4543334;rs9345107;rs17551155;rs34543228;rs9345117;rs10944534;rs9353820;rs76966106
352	224	6:92773778:A:C	rs2452961	6	92773778	9.965e-15	5	rs2452961;rs10944560;rs10447342;rs2452975;rs12189893
353	225	6:98553894:A:G	rs1487441	6	98553894	3.6409e-17	6	rs1487441;rs1933720;rs9320747;rs4839716;rs1906251;rs17814604
354	226	6:113206750:G:T	rs17074552	6	113206750	1.13769e-08	1	rs17074552
355	227	6:122581156:A:G	rs11756232	6	122581156	7.36139e-12	3	rs11756232;rs1350229;rs75583944
356	228	6:126069636:C:G	rs3757217	6	126069636	4.6305e-35	7	rs3757217;rs1935774;rs13197100;rs1268069;rs1268792;rs9398785;rs9321057
357	228	6:126362154:C:T	rs6900796	6	126362154	7.21958e-10	1	rs6900796
358	228	6:126733094:C:T	rs59698523	6	126733094	3.26988e-105	11	rs59698523;rs10457477;rs4897175;rs41285260;rs12202204;rs11759026;rs7753563;rs6569466;rs1262478;rs12525327;rs9401921
359	228	6:127078181:C:T	rs79636188	6	127078181	8.9586e-28	5	rs79636188;rs6569466;rs79127564;rs139849708;rs77495054
360	228	6:127107582:A:G	rs2143679	6	127107582	3.82429e-11	9	rs2143679;rs12202204;rs7753563;rs6569466;rs12525327;rs9388539;rs9401921;rs9401923;rs719726
361	228	6:127212478:A:G	rs17054192	6	127212478	1.3797e-12	3	rs17054192;rs41285260;rs11759026
362	228	6:127440047:C:T	rs577721086	6	127440047	3.50815e-15	1	rs577721086
363	228	6:127443092:C:T	rs9482770	6	127443092	6.02063e-15	5	rs9482770;rs12202204;rs9401923;rs719726;rs35323862
364	229	6:130341235:C:T	rs113898003	6	130341235	9.26452e-12	1	rs113898003
365	230	6:131307854:C:T	rs4897478	6	131307854	5.12341e-21	7	rs4897478;rs72998212;rs2281487;rs7771543;rs9321266;rs9398970;rs6928334
366	231	6:133265267:A:G	rs9321385	6	133265267	1.12505e-11	9	rs9321385;rs62425135;rs7739978;rs7740291;rs1749225;rs9385629;rs4640903;rs34115816;rs799227
367	231	6:133388232:A:G	rs10457002	6	133388232	6.23458e-18	12	rs10457002;rs4640903;rs4895954;rs799227;rs6927143;rs9493568;rs6569874;rs78457404;rs211435;rs62428663;rs9375957;rs159408
368	231	6:133568151:C:T	rs511490	6	133568151	1.70454e-30	14	rs511490;rs4640903;rs34115816;rs4895954;rs799227;rs546329;rs6927143;rs9493568;rs492771;rs6569874;rs211435;rs72991942;rs4895961;rs159408
369	231	6:133803011:C:G	rs212772	6	133803011	2.92763e-13	1	rs212772
370	232	6:136090153:C:G	rs10872446	6	136090153	7.87582e-13	2	rs10872446;rs11154825
371	232	6:136261860:A:G	rs9373157	6	136261860	3.43368e-13	2	rs9373157;rs12203398
372	233	6:138866268:C:T	rs9376354	6	138866268	7.64537e-37	8	rs9376354;rs12193890;rs9321661;rs6922771;rs6570242;rs4314513;rs28396128;rs4243456
373	234	6:140091162:G:T	rs9376461	6	140091162	2.36196e-09	3	rs9376461;rs4520026;rs4301318
374	235	6:149378922:A:G	rs9498199	6	149378922	1.85438e-10	2	rs9498199;rs7746208
375	235	6:149735097:A:T	rs366905	6	149735097	5.46337e-09	4	rs366905;rs9498348;rs2744432;rs73006854
376	235	6:149973764:A:G	rs12523793	6	149973764	4.79236e-17	6	rs12523793;rs9498348;rs2744432;rs73006854;rs9322225;rs1999632
377	236	6:151022220:C:T	rs6916149	6	151022220	1.9767e-11	2	rs6916149;rs6913518
378	237	6:157321814:C:G	rs12203289	6	157321814	9.97619e-16	2	rs12203289;rs2078047
379	238	6:159690238:C:T	rs11756152	6	159690238	2.30886e-09	1	rs11756152
380	239	6:168247699:A:C	rs34049558	6	168247699	2.66638e-09	1	rs34049558
381	240	6:169301357:C:T	rs10945320	6	169301357	2.26619e-09	1	rs10945320
382	240	6:169482877:C:T	rs17788472	6	169482877	1.83038e-16	3	rs17788472;rs73034020;rs2224645
383	240	6:169588360:A:G	rs10945391	6	169588360	1.38505e-12	2	rs10945391;rs11760041
384	240	6:170123196:A:G	rs6459655	6	170123196	1.86201e-09	3	rs6459655;rs9383498;rs6459663
385	241	6:170545279:A:G	rs3012434	6	170545279	3.97518e-11	1	rs3012434
386	242	7:2760935:C:T	rs798548	7	2760935	1.69514e-33	9	rs798548;rs10807805;rs10950842;rs798561;rs10480003;rs709282;rs208346;rs7790322;rs1183079
387	243	7:7277215:C:G	rs11771259	7	7277215	9.99562e-09	1	rs11771259
388	244	7:15608109:A:T	rs2389534	7	15608109	1.98991e-12	1	rs2389534
389	245	7:16115413:A:G	rs10277151	7	16115413	3.98256e-09	1	rs10277151
390	246	7:17925975:A:G	rs2714875	7	17925975	4.97225e-08	1	rs2714875
391	247	7:18751998:C:T	rs1178118	7	18751998	9.44599e-10	2	rs1178118;rs1178099
392	247	7:18819605:C:T	rs3901892	7	18819605	2.41635e-16	4	rs3901892;rs1178099;rs11764116;rs62446605
393	247	7:18904400:C:G	rs12700001	7	18904400	1.19771e-48	4	rs12700001;rs957958;rs7811991;rs17350431
394	247	7:18970503:A:G	rs73083857	7	18970503	7.32738e-09	3	rs73083857;rs6969316;rs2853552
395	247	7:19021073:A:G	rs2717350	7	19021073	4.85829e-20	5	rs2717350;rs2853552;rs1859664;rs6976460;rs993083
396	247	7:19141259:A:G	rs17140672	7	19141259	6.22689e-12	1	rs17140672
397	247	7:19353389:A:G	rs11762830	7	19353389	1.38065e-11	9	rs11762830;rs2109844;rs10950714;rs9654950;rs6963269;rs28536190;rs960046;rs1024768;rs7794294
398	247	7:19435501:A:G	rs73079218	7	19435501	3.26176e-18	8	rs73079218;rs2109844;rs9654950;rs6963269;rs28536190;rs960046;rs1024768;rs7794294
399	247	7:19520977:A:G	rs73685918	7	19520977	7.23041e-16	4	rs73685918;rs111380736;rs4570042;rs17141731
400	247	7:19612305:C:T	rs2192476	7	19612305	2.13592e-140	10	rs2192476;rs1024768;rs67832021;rs6966911;rs4719563;rs56322714;rs6971655;rs2892936;rs4570042;rs67763469
401	247	7:19749440:A:C	rs6949635	7	19749440	1.15959e-14	1	rs6949635
402	248	7:28196222:A:G	rs849134	7	28196222	2.88598e-10	2	rs849134;rs1109484
403	249	7:29360962:C:T	rs12532376	7	29360962	6.51426e-14	2	rs12532376;rs39120
404	250	7:33324104:G:T	rs6946608	7	33324104	2.45224e-49	11	rs6946608;rs3843532;rs2392165;rs7793759;rs73095390;rs2110765;rs2216031;rs6462477;rs17725673;rs4607502;rs4723291
405	250	7:33484507:G:T	rs1860601	7	33484507	9.03748e-09	7	rs1860601;rs7793759;rs73095390;rs58365873;rs6462477;rs4607502;rs4723291
406	250	7:33525304:A:G	rs6966995	7	33525304	1.33281e-13	6	rs6966995;rs2392165;rs73095390;rs58365873;rs4607502;rs7798984
407	251	7:37946547:A:G	rs1052969	7	37946547	3.02561e-14	2	rs1052969;rs35681117
408	251	7:38118400:C:G	rs10273104	7	38118400	5.29162e-29	7	rs10273104;rs1450851;rs1717764;rs6462803;rs1618737;rs6978070;rs1403980
409	252	7:43031154:A:C	rs986412	7	43031154	1.25306e-14	1	rs986412
410	253	7:54941328:C:T	rs76928645	7	54941328	6.1675e-12	1	rs76928645
411	254	7:69401395:A:G	rs12698818	7	69401395	3.0144e-10	1	rs12698818
412	255	7:81418596:G:T	rs10252734	7	81418596	1.81039e-20	4	rs10252734;rs3735520;rs13234493;rs10248271
413	256	7:82977124:A:T	rs3109167	7	82977124	4.629e-09	1	rs3109167
414	257	7:83579807:C:T	rs797832	7	83579807	1.41611e-08	4	rs797832;rs1639599;rs13232278;rs62473925
415	257	7:83692153:A:G	rs9690948	7	83692153	3.62006e-15	9	rs9690948;rs1639599;rs3779437;rs13232278;rs62473925;rs148983840;rs12707607;rs2301892;rs757682
416	257	7:84253690:C:T	rs12669000	7	84253690	7.62035e-09	6	rs12669000;rs10246488;rs6972054;rs73177700;rs7780132;rs12707697
417	257	7:84666851:A:G	rs10260131	7	84666851	9.90819e-22	7	rs10260131;rs10246488;rs35924685;rs1367365;rs7780132;rs12707697;rs6966472
418	258	7:96115099:A:G	rs10281460	7	96115099	9.51725e-12	5	rs10281460;rs2524970;rs6965122;rs7793261;rs10464592
419	258	7:96219460:A:G	rs7788173	7	96219460	8.35683e-130	23	rs7788173;rs2524970;rs2724051;rs10250692;rs62470042;rs6965122;rs62470048;rs7793261;rs11765423;rs4360228;rs68189065;rs10464592;rs10240328;rs62470368;rs4410848;rs10273072;rs113666159;rs79738533;rs34619035;rs1524926;rs6964827;rs13226445;rs7456227
420	258	7:96366342:C:T	rs12704876	7	96366342	3.02095e-09	10	rs12704876;rs6965122;rs11765423;rs68189065;rs10464592;rs10240328;rs34619035;rs6964827;rs13226445;rs7456227
421	258	7:96652216:A:G	rs111564934	7	96652216	8.60024e-11	1	rs111564934
422	259	7:99171449:C:T	rs952319	7	99171449	1.1847e-10	3	rs952319;rs10215765;rs34670419
423	260	7:100089860:C:T	rs6979335	7	100089860	7.46516e-10	1	rs6979335
424	260	7:100197866:A:G	rs62482222	7	100197866	9.26779e-09	2	rs62482222;rs2272572
425	260	7:100271521:C:T	rs221789	7	100271521	1.06459e-11	1	rs221789
426	261	7:101035557:C:T	rs10278838	7	101035557	1.69664e-08	6	rs10278838;rs7803516;rs13238944;rs6947185;rs34487048;rs4045
427	261	7:101044030:A:G	rs11772848	7	101044030	1.69908e-33	8	rs11772848;rs7803516;rs13247684;rs13238944;rs6947185;rs11772022;rs34487048;rs4045
428	262	7:102579193:C:G	rs6968713	7	102579193	2.94404e-08	1	rs6968713
429	263	7:103356275:C:T	rs12705150	7	103356275	2.05392e-08	1	rs12705150
430	264	7:114171145:A:G	rs9332390	7	114171145	3.47162e-25	6	rs9332390;rs1668331;rs10229691;rs8180817;rs13222712;rs656172
431	265	7:115852160:C:G	rs12672804	7	115852160	2.38763e-08	1	rs12672804
432	266	7:117609096:A:G	rs10264112	7	117609096	2.24431e-14	2	rs10264112;rs35895632
433	267	7:120672252:C:T	rs17535702	7	120672252	2.92216e-09	2	rs17535702;rs2110279
434	267	7:120788346:C:G	rs1917110	7	120788346	3.87394e-70	20	rs1917110;rs6466766;rs12176609;rs1861001;rs10249736;rs12668590;rs61128227;rs28562415;rs6971407;rs17356657;rs17284876;rs12706334;rs10953934;rs798914;rs2536149;rs798903;rs2952559;rs12534075;rs17509082;rs10254825
435	267	7:120819114:C:T	rs28476487	7	120819114	1.35534e-22	7	rs28476487;rs2110279;rs6961416;rs28562415;rs798905;rs78562306;rs76042375
436	267	7:120871644:A:G	rs71569059	7	120871644	1.66606e-10	6	rs71569059;rs12668590;rs12706334;rs798905;rs2952559;rs13247600
437	267	7:120941547:C:G	rs73217386	7	120941547	2.77602e-11	1	rs73217386
438	267	7:120963965:A:G	rs3757552	7	120963965	3.09813e-13	6	rs3757552;rs2536149;rs798905;rs2952559;rs78562306;rs10254825
439	267	7:120966790:A:G	rs3779381	7	120966790	4.80448e-124	12	rs3779381;rs17356657;rs17284876;rs10953934;rs1541508;rs12534075;rs17509082;rs2707520;rs76042375;rs10254825;rs17143281;rs2536189
440	267	7:120967213:A:T	rs2536192	7	120967213	2.74774e-30	9	rs2536192;rs2721375;rs28562415;rs13229558;rs17508510;rs11768439;rs2707520;rs10254825;rs2536189
441	267	7:121004989:A:G	rs73219303	7	121004989	2.7639e-17	6	rs73219303;rs798914;rs798903;rs2707520;rs10254825;rs2536189
442	267	7:121017812:C:T	rs2952565	7	121017812	8.72121e-15	4	rs2952565;rs2707520;rs10254825;rs2536189
443	267	7:121093671:A:C	rs1609291	7	121093671	2.42049e-11	1	rs1609291
444	267	7:121178639:G:T	rs11761042	7	121178639	2.64684e-11	2	rs11761042;rs11768475
445	268	7:127591737:G:T	rs55660321	7	127591737	4.21669e-14	2	rs55660321;rs56209514
446	269	7:129663496:C:T	rs11556924	7	129663496	9.11797e-13	1	rs11556924
447	270	7:134403741:C:T	rs2347709	7	134403741	1.05278e-12	2	rs2347709;rs4728335
448	270	7:134509768:C:T	rs974401	7	134509768	5.1331e-09	1	rs974401
449	271	7:137116476:A:G	rs6943070	7	137116476	2.05308e-11	1	rs6943070
450	272	7:151498679:C:T	rs4128399	7	151498679	4.32812e-55	2	rs4128399;rs34802637
451	273	7:155772027:C:T	rs77324770	7	155772027	1.17987e-11	1	rs77324770
452	274	8:6322520:A:G	rs546754206	8	6322520	1.38969e-08	2	rs546754206;rs2922886
453	274	8:6344916:C:G	rs2442487	8	6344916	1.31609e-08	1	rs2442487
454	274	8:6372975:C:T	rs3020219	8	6372975	3.43192e-15	2	rs3020219;rs2922886
455	274	8:6458081:C:G	rs2959788	8	6458081	7.40195e-11	1	rs2959788
456	275	8:8116419:C:T	rs2945268	8	8116419	1.5122e-10	7	rs2945268;rs2945232;rs2945897;rs2945903;rs7833103;rs17150353;rs332040
457	275	8:8137083:G:T	rs2955578	8	8137083	1.19621e-22	1	rs2955578
458	275	8:9090902:A:G	rs330060	8	9090902	1.29773e-37	136	rs330060;rs2945232;rs4840913;rs867657;rs62496020;rs6601689;rs2945897;rs2176631;rs7833103;rs17150353;rs11786306;rs2976956;rs11787150;rs2945870;rs2945865;rs1971412;rs2976940;rs2976843;rs2979162;rs2980773;rs2979188;rs2921099;rs35144760;rs4375003;rs12546760;rs4840982;rs13251924;rs66818590;rs28472946;rs2177255;rs4841006;rs71514507;rs73508132;rs4841009;rs7012395;rs13260303;rs574595;rs559534;rs474892;rs…
459	275	8:10019467:A:G	rs36126674	8	10019467	1.36618e-09	13	rs36126674;rs12543235;rs10095135;rs56243511;rs587328;rs609283;rs525018;rs12545826;rs35437983;rs4841286;rs7824675;rs35406700;rs6992818
460	275	8:10103179:C:G	rs2952225	8	10103179	3.24553e-10	82	rs2952225;rs10102807;rs2126266;rs7387873;rs330088;rs747749;rs11781008;rs330081;rs330071;rs62493792;rs35614264;rs11774915;rs898797;rs9693857;rs17730481;rs13262031;rs13263409;rs4841207;rs35169606;rs12543235;rs35241117;rs4841254;rs10095135;rs10092464;rs56243511;rs587328;rs609283;rs570903;rs34469600;rs35044612;rs525018;rs670044;rs12545826;rs1484639;rs35437983;rs4841286;rs28630503;rs13275453;rs7017349…
461	275	8:11109269:C:T	rs10481445	8	11109269	9.05651e-31	97	rs10481445;rs6983870;rs13276526;rs11249981;rs34028848;rs13269741;rs4841317;rs11774474;rs7837979;rs12114255;rs6601449;rs7824675;rs35406700;rs11774221;rs11250005;rs7818307;rs7837520;rs4439176;rs4452832;rs6992818;rs7816990;rs35602868;rs4455790;rs7002088;rs9969657;rs4292651;rs10093774;rs2292369;rs77753174;rs2409665;rs12542037;rs79315643;rs11990550;rs7000276;rs10109025;rs35792458;rs11786713;rs28712221…
462	276	8:23110503:C:T	rs11135712	8	23110503	5.04781e-12	1	rs11135712
463	277	8:25881623:C:T	rs17239945	8	25881623	1.14501e-08	3	rs17239945;rs17818797;rs62501779
464	277	8:25894943:C:T	rs17818981	8	25894943	1.14306e-12	3	rs17818981;rs17818797;rs62501779
465	277	8:26130329:G:T	rs4872421	8	26130329	1.41254e-08	1	rs4872421
466	277	8:26339139:A:G	rs328092	8	26339139	1.92634e-10	13	rs328092;rs328077;rs10098679;rs11785449;rs35995623;rs12678637;rs36041454;rs442103;rs6990931;rs5029306;rs35491396;rs11775862;rs17322640
467	277	8:26453468:G:T	rs11990271	8	26453468	5.81359e-26	18	rs11990271;rs12674518;rs328077;rs10098679;rs11785449;rs35995623;rs10107066;rs12548421;rs36041454;rs442103;rs388047;rs6990931;rs5029306;rs35491396;rs2585459;rs11775862;rs17322640;rs10088957
468	278	8:27888626:A:C	rs2305456	8	27888626	5.93022e-10	1	rs2305456
469	279	8:28427057:C:T	rs55771603	8	28427057	9.00434e-09	1	rs55771603
470	280	8:37652369:G:T	rs4976894	8	37652369	7.46658e-10	1	rs4976894
471	281	8:38291836:C:T	rs16887377	8	38291836	5.34279e-09	1	rs16887377
472	282	8:41167562:C:G	rs147918758	8	41167562	2.94075e-10	2	rs147918758;rs61252057
473	283	8:48885436:A:T	rs762679	8	48885436	1.15714e-08	1	rs762679
474	284	8:49332315:A:G	rs72639011	8	49332315	5.16771e-09	1	rs72639011
475	285	8:57185107:A:G	rs13207748	8	57185107	1.74665e-08	1	rs13207748
476	286	8:60731440:A:T	rs10087957	8	60731440	8.45538e-17	4	rs10087957;rs6982265;rs7821280;rs510005
477	287	8:66462476:C:T	rs11779601	8	66462476	3.67069e-08	1	rs11779601
478	288	8:71905587:G:T	rs1493202	8	71905587	3.82907e-15	5	rs1493202;rs17758721;rs727377;rs2380687;rs10504497
479	289	8:72392687:A:G	rs10093418	8	72392687	1.07439e-15	3	rs10093418;rs7823971;rs150449323
480	290	8:74281152:C:T	rs10112386	8	74281152	2.47496e-13	2	rs10112386;rs28534016
481	290	8:74348353:C:T	rs2383893	8	74348353	3.65908e-15	5	rs2383893;rs12544186;rs7832194;rs10102311;rs10097236
482	291	8:78141371:A:G	rs1452826	8	78141371	1.88694e-12	3	rs1452826;rs10957844;rs10088744
483	292	8:88723758:A:G	rs13259657	8	88723758	6.04848e-17	4	rs13259657;rs28367240;rs7465163;rs11780762
484	293	8:97176396:C:T	rs2514533	8	97176396	2.78057e-09	1	rs2514533
485	294	8:108379772:G:T	rs2445367	8	108379772	6.52511e-12	4	rs2445367;rs1892765;rs4463391;rs2436558
486	294	8:108414618:C:T	rs1283690	8	108414618	5.2709e-40	11	rs1283690;rs2514866;rs1433192;rs1283674;rs1283672;rs4114169;rs1654681;rs10098499;rs1433165;rs1283727;rs6993722
487	294	8:108473294:A:T	rs4734972	8	108473294	3.28707e-10	9	rs4734972;rs2514866;rs1283674;rs1283672;rs4114169;rs1654681;rs10098499;rs1433165;rs1283727
488	294	8:108972055:C:T	rs629702	8	108972055	4.37904e-63	9	rs629702;rs2881824;rs7008705;rs1389976;rs201770555;rs555008;rs664170;rs16877095;rs2514841
489	294	8:109063823:C:G	rs4734169	8	109063823	4.25078e-08	3	rs4734169;rs16877095;rs2514841
490	295	8:110648272:C:T	rs16879844	8	110648272	2.15696e-13	3	rs16879844;rs6469274;rs3133935
491	296	8:116986439:A:G	rs72681827	8	116986439	5.70475e-09	1	rs72681827
492	297	8:118867693:C:G	rs72673939	8	118867693	1.72323e-10	1	rs72673939
493	298	8:119806645:C:T	rs34266810	8	119806645	2.6812e-16	6	rs34266810;rs80294347;rs3103979;rs13340616;rs10955912;rs1564859
494	298	8:119954484:C:T	rs10611942	8	119954484	6.42595e-51	16	rs10611942;rs1845389;rs3134036;rs1493935;rs3103971;rs1353171;rs10112995;rs10955912;rs1385503;rs1564859;rs7839059;rs1485305;rs1586274;rs1485314;rs1485300;rs6469814
495	298	8:120206661:A:G	rs4871362	8	120206661	5.7836e-09	3	rs4871362;rs1485300;rs6469814
496	298	8:120433370:C:T	rs58486051	8	120433370	4.49998e-17	4	rs58486051;rs55642283;rs140402473;rs75700758
497	298	8:120596023:A:G	rs10283100	8	120596023	4.95221e-25	2	rs10283100;rs71571620
498	298	8:120636850:A:G	rs6469835	8	120636850	4.12771e-26	11	rs6469835;rs9297594;rs2326212;rs200044772;rs4870783;rs714607;rs12544233;rs6469833;rs13267849;rs7013090;rs2326308
499	298	8:120687669:A:T	rs6984417	8	120687669	8.70785e-09	4	rs6984417;rs71571620;rs13267849;rs2326308
500	299	8:122145902:G:T	rs12681217	8	122145902	6.99053e-14	1	rs12681217
501	300	8:129474882:A:T	rs1516960	8	129474882	4.09814e-11	3	rs1516960;rs4476974;rs73380319
502	300	8:129951769:C:T	rs7815993	8	129951769	1.66543e-19	6	rs7815993;rs202145548;rs1530300;rs1866981;rs17242358;rs13272617
503	300	8:129965593:C:T	rs72728744	8	129965593	3.23736e-09	4	rs72728744;rs1530300;rs17242358;rs13272617
504	301	8:130645692:A:G	rs55705857	8	130645692	5.41517e-13	1	rs55705857
505	302	8:141711951:C:T	rs11986785	8	141711951	4.3118e-09	1	rs11986785
506	302	8:142233573:A:G	rs10112337	8	142233573	3.20109e-10	2	rs10112337;rs7001864
507	303	8:145002283:A:G	rs11993233	8	145002283	1.55722e-22	6	rs11993233;rs10100277;rs9314420;rs6558408;rs11544989;rs11136343
508	304	9:978374:C:T	rs279889	9	978374	9.50725e-13	5	rs279889;rs56313240;rs279910;rs16926977;rs75785779
509	304	9:1114919:A:G	rs10809314	9	1114919	7.98059e-10	2	rs10809314;rs7867731
510	305	9:1448182:A:G	rs7848169	9	1448182	8.16888e-09	1	rs7848169
511	306	9:3937351:A:G	rs570820	9	3937351	1.4273e-08	1	rs570820
512	307	9:13949666:C:T	rs13283645	9	13949666	3.9459e-15	3	rs13283645;rs10119201;rs55776100
513	308	9:15756094:A:G	rs10962142	9	15756094	3.32229e-12	1	rs10962142
514	309	9:16681762:C:G	rs3850444	9	16681762	1.95787e-40	12	rs3850444;rs1411428;rs7046154;rs10810588;rs12335424;rs7044816;rs1538101;rs11787694;rs7031229;rs10962595;rs10962596;rs55763764
515	310	9:17323254:C:T	rs10963034	9	17323254	1.03459e-08	1	rs10963034
516	311	9:22381409:G:T	rs34254072	9	22381409	3.05611e-16	2	rs34254072;rs558612
517	312	9:35728494:A:G	rs4142495	9	35728494	4.49016e-10	1	rs4142495
518	313	9:83521637:A:G	rs72733953	9	83521637	6.45533e-10	4	rs72733953;rs10119247;rs10867645;rs10780480
519	313	9:83588772:G:T	rs72736057	9	83588772	3.95878e-14	6	rs72736057;rs12551463;rs76514437;rs10119247;rs10867645;rs10780480
520	314	9:89537928:A:C	rs1022994	9	89537928	1.19403e-10	1	rs1022994
521	315	9:92213967:A:G	rs1007966	9	92213967	8.97603e-12	2	rs1007966;rs913807
522	316	9:94253336:C:T	rs10991953	9	94253336	1.07163e-08	1	rs10991953
523	317	9:94939615:C:T	rs4744122	9	94939615	1.30106e-09	2	rs4744122;rs7045451
524	318	9:95951477:C:T	rs10821083	9	95951477	1.49248e-11	4	rs10821083;rs34085543;rs13293217;rs10739947
525	318	9:96341324:G:T	rs10821162	9	96341324	6.3575e-11	4	rs10821162;rs13293217;rs10739947;rs10992729
526	319	9:98198202:C:T	rs568513587	9	98198202	1.8022e-08	4	rs568513587;rs357544;rs16909865;rs145965565
527	319	9:98278644:A:C	rs28591501	9	98278644	5.17069e-29	6	rs28591501;rs16909865;rs28468571;rs145965565;rs28778940;rs75655735
528	319	9:98526672:A:G	rs10117423	9	98526672	4.01376e-14	5	rs10117423;rs700978;rs100845;rs4743288;rs10982065
529	319	9:98557460:C:T	rs2897061	9	98557460	3.43898e-11	2	rs2897061;rs689860
530	320	9:101639827:G:T	rs7023465	9	101639827	1.50674e-19	5	rs7023465;rs10819392;rs1007890;rs4743294;rs2065598
531	321	9:110049476:A:G	rs7031904	9	110049476	2.12577e-08	1	rs7031904
532	322	9:110404076:C:T	rs12335820	9	110404076	1.36897e-14	3	rs12335820;rs10978948;rs4979218
533	323	9:111255387:C:T	rs7873923	9	111255387	1.45722e-08	1	rs7873923
534	324	9:113611328:C:T	rs521881	9	113611328	9.82066e-15	7	rs521881;rs13290899;rs533488;rs10980607;rs10817101;rs10980625;rs7854681
535	324	9:113651161:A:T	rs4556147	9	113651161	1.5865e-22	9	rs4556147;rs10817101;rs10980625;rs7854681;rs1854055;rs2254841;rs10817115;rs10980675;rs7864606
536	324	9:114057475:A:C	rs72607186	9	114057475	1.08198e-08	1	rs72607186
537	325	9:118957985:G:T	rs446783	9	118957985	5.62745e-25	3	rs446783;rs1411821;rs373915
538	325	9:119065043:C:T	rs35565319	9	119065043	1.42176e-48	2	rs35565319;rs148004436
539	325	9:119129257:C:T	rs7033487	9	119129257	9.04312e-11	1	rs7033487
540	325	9:119245183:A:G	rs7030607	9	119245183	3.22263e-26	7	rs7030607;rs1040851;rs35109285;rs11792948;rs10983204;rs4836757;rs10983314
541	325	9:119312256:G:T	rs1861881	9	119312256	8.15545e-12	8	rs1861881;rs1040851;rs35109285;rs11792948;rs10983204;rs4836757;rs73655468;rs10983314
542	326	9:126334485:C:T	rs73578186	9	126334485	4.17907e-11	4	rs73578186;rs10119667;rs10117940;rs3739827
543	327	9:129459314:C:T	rs34200683	9	129459314	3.53163e-13	3	rs34200683;rs12684746;rs62580161
544	327	9:129714988:C:G	rs490577	9	129714988	3.00998e-11	1	rs490577
545	328	9:136142355:A:G	rs643434	9	136142355	8.57016e-15	4	rs643434;rs7857390;rs532436;rs41302673
546	329	9:139097773:A:C	rs11103381	9	139097773	1.20714e-09	1	rs11103381
547	330	10:3274002:A:G	rs11251790	10	3274002	2.84511e-09	1	rs11251790
548	331	10:7622009:A:G	rs41298373	10	7622009	1.60049e-11	1	rs41298373
549	332	10:8098719:C:T	rs1399180	10	8098719	2.29914e-08	1	rs1399180
550	332	10:8127139:A:G	rs12412241	10	8127139	3.81689e-09	2	rs12412241;rs1778058
551	333	10:9063530:A:G	rs1444787	10	9063530	2.16003e-10	3	rs1444787;rs1342767;rs372712
552	333	10:9194006:C:T	rs1149935	10	9194006	5.74661e-23	5	rs1149935;rs1342767;rs391733;rs372712;rs7101254
553	334	10:14680621:C:T	rs1410071	10	14680621	1.28202e-08	1	rs1410071
554	335	10:21821918:A:T	rs12251016	10	21821918	3.16368e-29	6	rs12251016;rs11596452;rs12766229;rs12268489;rs2050905;rs7075508
555	336	10:27894442:G:T	rs7088929	10	27894442	1.35438e-11	2	rs7088929;rs10764720
556	336	10:27992342:A:G	rs56113471	10	27992342	1.79208e-08	1	rs56113471
557	337	10:28476516:A:G	rs4568902	10	28476516	1.28376e-09	1	rs4568902
558	338	10:28966494:G:T	rs1888085	10	28966494	1.40686e-13	2	rs1888085;rs11007183
559	339	10:31117358:A:G	rs11008282	10	31117358	5.10264e-23	2	rs11008282;rs793099
560	340	10:32267495:C:G	rs78862806	10	32267495	1.11874e-10	3	rs78862806;rs34754365;rs11008750
561	341	10:33586399:A:C	rs10827231	10	33586399	2.49427e-15	2	rs10827231;rs2183714
562	341	10:33653931:A:G	rs74571939	10	33653931	2.82212e-10	2	rs74571939;rs2183714
563	342	10:34465205:C:T	rs614299	10	34465205	8.91544e-09	1	rs614299
564	342	10:34858591:C:T	rs56777924	10	34858591	1.34171e-08	1	rs56777924
565	343	10:48442894:A:G	rs17537178	10	48442894	2.18752e-15	2	rs17537178;rs12769499
566	344	10:50315893:A:G	rs13088	10	50315893	4.69278e-34	8	rs13088;rs2943252;rs2250602;rs2943253;rs4445564;rs4421674;rs72789086;rs2377991
567	345	10:52734495:A:G	rs10822020	10	52734495	9.8191e-12	1	rs10822020
568	346	10:62082737:A:G	rs10821723	10	62082737	1.2161e-10	1	rs10821723
569	347	10:70634634:A:G	rs7906601	10	70634634	3.14534e-08	1	rs7906601
570	348	10:77767412:C:T	rs4745804	10	77767412	3.87111e-08	1	rs4745804
571	349	10:78360222:C:T	rs4562750	10	78360222	4.32117e-08	1	rs4562750
572	350	10:90257225:C:T	rs2576171	10	90257225	2.56801e-11	1	rs2576171
573	351	10:94823343:C:T	rs12263369	10	94823343	1.50064e-15	5	rs12263369;rs6583847;rs4933754;rs1536330;rs4418728
574	351	10:94843866:C:G	rs10748591	10	94843866	2.87999e-09	4	rs10748591;rs1536330;rs4418728;rs10882150
575	351	10:94917819:G:T	rs2149109	10	94917819	1.92855e-23	2	rs2149109;rs1927465
576	351	10:94923949:A:G	rs61861102	10	94923949	1.32483e-20	10	rs61861102;rs7915548;rs932850;rs1927473;rs1983938;rs12769915;rs116896146;rs6583871;rs1927465;rs11187344
577	351	10:94941927:C:T	rs7916761	10	94941927	1.67306e-34	11	rs7916761;rs10882150;rs7915548;rs932850;rs10786074;rs1983938;rs12769915;rs6583871;rs12767937;rs1222925;rs2761311
578	351	10:95032274:C:T	rs10882203	10	95032274	2.26433e-12	4	rs10882203;rs12769915;rs1222925;rs2761311
579	352	10:96038686:A:G	rs11187838	10	96038686	3.6398e-21	3	rs11187838;rs7083628;rs7910752
580	352	10:96071561:A:G	rs2077218	10	96071561	1.05137e-10	3	rs2077218;rs7083628;rs7910752
581	353	10:99948489:A:G	rs9651448	10	99948489	1.01461e-12	2	rs9651448;rs1983865
582	354	10:102245664:C:T	rs149658356	10	102245664	3.75241e-10	1	rs149658356
583	354	10:102269206:A:G	rs3763695	10	102269206	2.26491e-09	1	rs3763695
584	355	10:104313365:C:T	rs10786677	10	104313365	2.77145e-19	11	rs10786677;rs11591780;rs3808937;rs61869602;rs12767683;rs10883756;rs72845815;rs2244524;rs2253950;rs7909591;rs7092200
585	355	10:104520277:A:G	rs12571643	10	104520277	8.14348e-10	4	rs12571643;rs72841270;rs7909591;rs11191582
586	355	10:105378840:A:G	rs11191749	10	105378840	1.69591e-14	10	rs11191749;rs72845815;rs72843998;rs7093667;rs17736358;rs72848984;rs9521;rs2902634;rs3758575;rs4630220
587	355	10:105599770:G:T	rs11191822	10	105599770	1.28036e-14	1	rs11191822
588	356	10:111768533:A:T	rs34326903	10	111768533	1.19889e-11	1	rs34326903
589	357	10:114750157:C:T	rs11196182	10	114750157	9.34833e-11	1	rs11196182
590	358	10:118668311:A:G	rs10886016	10	118668311	3.79972e-31	4	rs10886016;rs1681752;rs2531688;rs1947798
591	359	10:119262900:A:G	rs10787774	10	119262900	9.33347e-14	4	rs10787774;rs740739;rs7909884;rs75896540
592	360	10:126431281:C:G	rs10901814	10	126431281	3.95697e-60	16	rs10901814;rs11595762;rs2061068;rs11245315;rs34501420;rs3740536;rs2061071;rs17623606;rs6597851;rs869303;rs7894089;rs11245345;rs10901821;rs2559517;rs2247727;rs6421962
593	361	10:127687978:A:C	rs11244758	10	127687978	2.48263e-10	1	rs11244758
594	362	10:131440429:C:T	rs4751108	10	131440429	3.28388e-18	6	rs4751108;rs12250054;rs3858300;rs540992;rs77900915;rs508360
595	363	11:200343:C:T	rs55966801	11	200343	3.21028e-08	1	rs55966801
596	364	11:1602568:A:G	rs34995599	11	1602568	1.89627e-08	1	rs34995599
597	365	11:2165576:A:G	rs35506085	11	2165576	7.50908e-09	1	rs35506085
598	365	11:2170143:A:G	rs1004446	11	2170143	4.75233e-17	3	rs1004446;rs17885652;rs10840452
599	366	11:8826559:A:C	rs12794444	11	8826559	4.07158e-10	1	rs12794444
600	367	11:10674044:C:G	rs4910165	11	10674044	1.67801e-10	1	rs4910165
601	368	11:12071547:A:G	rs11022130	11	12071547	3.71547e-18	1	rs11022130
602	369	11:14353957:C:G	rs34171876	11	14353957	1.09913e-10	1	rs34171876
603	370	11:20129311:A:G	rs35891966	11	20129311	2.56172e-15	1	rs35891966
604	371	11:27317383:A:C	rs6484289	11	27317383	5.8144e-18	5	rs6484289;rs4078183;rs10835165;rs3741407;rs7938352
605	371	11:27367200:C:T	rs11029962	11	27367200	1.37282e-19	6	rs11029962;rs4078183;rs7943352;rs10835165;rs3741407;rs12803615
606	371	11:27526645:C:T	rs12362567	11	27526645	5.1003e-17	7	rs12362567;rs10835165;rs11030003;rs4074516;rs7938352;rs10734393;rs112828922
607	372	11:31414151:A:G	rs796341	11	31414151	6.08585e-09	1	rs796341
608	373	11:32846693:C:G	rs78865122	11	32846693	1.22224e-08	1	rs78865122
609	374	11:44171456:C:T	rs4551754	11	44171456	9.39144e-11	1	rs4551754
610	374	11:44330610:C:T	rs66716358	11	44330610	1.93299e-26	7	rs66716358;rs11037927;rs2002991;rs879238;rs2054029;rs3845266;rs10501304
611	374	11:44410862:C:G	rs11037975	11	44410862	3.11982e-13	3	rs11037975;rs78576721;rs1010381
612	374	11:44493472:A:G	rs10838293	11	44493472	3.81253e-10	1	rs10838293
613	375	11:44850925:C:G	rs12795080	11	44850925	5.83154e-11	1	rs12795080
614	376	11:46051166:A:G	rs7130281	11	46051166	2.37207e-09	2	rs7130281;rs4073513
615	376	11:47174296:C:T	rs11039112	11	47174296	1.83255e-13	3	rs11039112;rs61884295;rs3136512
616	376	11:48091976:C:G	rs10769310	11	48091976	2.09284e-10	4	rs10769310;rs1317149;rs747782;rs2270993
617	377	11:57388551:A:G	rs7117896	11	57388551	1.09904e-08	1	rs7117896
618	377	11:57628345:A:G	rs675154	11	57628345	3.05121e-13	2	rs675154;rs1704774
619	378	11:58395627:A:G	rs61889537	11	58395627	3.21548e-08	1	rs61889537
620	379	11:61551356:C:T	rs174535	11	61551356	1.91773e-09	1	rs174535
621	380	11:65326154:A:G	rs12789028	11	65326154	1.02519e-10	3	rs12789028;rs1787663;rs111669836
622	380	11:65521126:G:T	rs11227289	11	65521126	1.39617e-09	3	rs11227289;rs111669836;rs9666878
623	381	11:68231705:A:G	rs10047483	11	68231705	1.49348e-09	1	rs10047483
624	382	11:69012244:A:T	rs12270641	11	69012244	8.65909e-10	2	rs12270641;rs3884627
625	383	11:74357437:A:G	rs1893362	11	74357437	2.62043e-14	1	rs1893362
626	384	11:80338069:A:G	rs1880692	11	80338069	9.38731e-12	1	rs1880692
627	385	11:91972287:G:T	rs1202384	11	91972287	4.47041e-09	1	rs1202384
628	386	11:92527522:C:T	rs10830948	11	92527522	9.87789e-17	3	rs10830948;rs484431;rs10765561
629	387	11:95308854:A:T	rs11021221	11	95308854	3.01507e-23	6	rs11021221;rs11021211;rs17633056;rs11021219;rs10831382;rs2254643
630	387	11:95472391:C:T	rs1255182	11	95472391	3.66023e-08	2	rs1255182;rs487609
631	388	11:100888602:A:T	rs581136	11	100888602	2.64892e-16	5	rs581136;rs1672663;rs10895041;rs495997;rs61892348
632	389	11:110547246:A:T	rs68062202	11	110547246	9.25475e-09	1	rs68062202
633	389	11:110890363:C:T	rs317518	11	110890363	9.34479e-13	1	rs317518
634	389	11:110953355:A:G	rs7924641	11	110953355	9.12152e-56	8	rs7924641;rs728059;rs12275707;rs10891224;rs73021578;rs949279;rs11213784;rs79058754
635	389	11:111056158:A:G	rs58066679	11	111056158	7.06905e-37	6	rs58066679;rs139327264;rs34077344;rs35519464;rs1607232;rs949279
636	389	11:111078415:G:T	rs7940533	11	111078415	6.20461e-11	4	rs7940533;rs1607232;rs949279;rs79058754
637	390	11:114081271:A:G	rs405388	11	114081271	1.58297e-10	4	rs405388;rs636406;rs1184748;rs3825045
638	391	11:117009789:C:T	rs2735181	11	117009789	6.36934e-11	1	rs2735181
639	392	11:128691976:C:T	rs571856	11	128691976	1.41863e-08	1	rs571856
640	393	11:130279168:C:T	rs7936928	11	130279168	1.04209e-38	5	rs7936928;rs4937514;rs1021205;rs7120276;rs1552330
641	393	11:130457883:A:G	rs6590483	11	130457883	1.87226e-12	2	rs6590483;rs1627019
642	393	11:130702192:G:T	rs4937576	11	130702192	1.05938e-16	1	rs4937576
643	394	12:1487421:G:T	rs10773940	12	1487421	1.57103e-10	3	rs10773940;rs16928276;rs61913098
644	395	12:21432829:C:T	rs11045930	12	21432829	7.70108e-09	1	rs11045930
645	396	12:24234001:A:G	rs7296101	12	24234001	4.15351e-10	2	rs7296101;rs11831634
646	397	12:27997918:C:T	rs7958415	12	27997918	4.16e-11	2	rs7958415;rs2347227
647	397	12:28045848:C:T	rs258443	12	28045848	3.56857e-10	6	rs258443;rs149299821;rs11049248;rs61915983;rs10843088;rs117568988
648	397	12:28082167:C:T	rs3963361	12	28082167	4.07768e-08	1	rs3963361
649	397	12:28145898:A:T	rs11049260	12	28145898	3.02155e-12	8	rs11049260;rs11049248;rs10843072;rs7964407;rs10843074;rs11049308;rs10843084;rs10843109
650	397	12:28221970:A:T	rs6487658	12	28221970	1.74731e-21	13	rs6487658;rs10843072;rs7964407;rs10843074;rs11049308;rs1543297;rs533762;rs10843084;rs10843088;rs17492715;rs722885;rs10843091;rs805129
651	397	12:28254212:G:T	rs2054474	12	28254212	3.04141e-31	14	rs2054474;rs58620740;rs533762;rs17492715;rs3864898;rs10843091;rs405394;rs41525752;rs10843096;rs4035202;rs36097532;rs189064624;rs10843148;rs6487691
652	397	12:28470084:C:T	rs9645730	12	28470084	3.56236e-74	19	rs9645730;rs10843074;rs11049308;rs10843084;rs11049327;rs722885;rs10843090;rs10843091;rs805129;rs405394;rs10843096;rs4035202;rs10843109;rs12813778;rs36097532;rs10771423;rs17434556;rs74863965;rs7970221
653	397	12:28578617:A:G	rs61920570	12	28578617	7.5649e-10	4	rs61920570;rs10843088;rs405394;rs10771423
654	397	12:28608894:A:G	rs7307682	12	28608894	1.32681e-11	7	rs7307682;rs4035202;rs12813778;rs117568988;rs10771423;rs17434556;rs7970221
655	397	12:28825855:C:T	rs73081643	12	28825855	4.34525e-10	1	rs73081643
656	397	12:29110669:A:G	rs17544148	12	29110669	3.21551e-08	1	rs17544148
657	398	12:31632449:C:T	rs3741878	12	31632449	8.43647e-12	1	rs3741878
658	399	12:32470788:G:T	rs9668328	12	32470788	4.1231e-13	3	rs9668328;rs10771943;rs325425
659	400	12:44039647:C:T	rs1373422	12	44039647	4.66633e-08	1	rs1373422
660	401	12:46382256:A:C	rs11183272	12	46382256	2.42415e-09	1	rs11183272
661	402	12:49519185:A:G	rs7976890	12	49519185	1.2405e-13	2	rs7976890;rs2117029
662	403	12:50934931:A:G	rs11169484	12	50934931	2.48447e-11	6	rs11169484;rs61928280;rs7975894;rs10876044;rs12815839;rs12305097
663	404	12:53676814:C:T	rs1609474	12	53676814	4.09605e-23	6	rs1609474;rs7398676;rs74977917;rs17751196;rs144680237;rs7300943
664	405	12:54674235:A:G	rs3809162	12	54674235	2.06994e-10	1	rs3809162
665	406	12:56435929:C:G	rs1131017	12	56435929	1.67526e-10	1	rs1131017
666	407	12:57519694:C:G	rs10467124	12	57519694	5.88927e-12	2	rs10467124;rs4367982
667	408	12:65824846:A:G	rs1389799	12	65824846	6.89929e-24	8	rs1389799;rs11175731;rs73119451;rs61921502;rs1494508;rs11830223;rs11175789;rs11175794
668	408	12:65905126:C:T	rs79487293	12	65905126	9.30287e-75	9	rs79487293;rs73117792;rs17178006;rs61921502;rs11175789;rs11175790;rs118187332;rs2256036;rs4762110
669	409	12:66376091:C:T	rs7306710	12	66376091	1.38464e-11	2	rs7306710;rs867633
670	410	12:68216239:A:T	rs35227403	12	68216239	7.85158e-13	1	rs35227403
671	411	12:77989204:A:G	rs772375	12	77989204	5.78547e-11	2	rs772375;rs696449
672	411	12:78197063:C:T	rs79036556	12	78197063	1.33052e-11	3	rs79036556;rs10859443;rs1123680
673	411	12:78288811:C:T	rs2619062	12	78288811	7.25583e-33	10	rs2619062;rs1123680;rs11107171;rs78522504;rs1731744;rs12311041;rs11835731;rs2928004;rs2731415;rs1007729
674	412	12:80048478:C:T	rs8176822	12	80048478	4.63432e-38	8	rs8176822;rs1268918;rs11114027;rs1245768;rs11525613;rs7297808;rs111520896;rs1553526
675	413	12:84003866:A:G	rs324780	12	84003866	1.22056e-12	3	rs324780;rs324805;rs4882465
676	414	12:85576492:A:G	rs11609649	12	85576492	1.39453e-12	3	rs11609649;rs7133817;rs7967247
677	414	12:85592285:C:G	rs74455916	12	85592285	4.51509e-09	3	rs74455916;rs7133817;rs7967247
678	414	12:85922318:G:T	rs9783420	12	85922318	3.85145e-08	1	rs9783420
679	415	12:93989735:A:T	rs6538437	12	93989735	1.06675e-12	2	rs6538437;rs11107114
680	416	12:95500635:A:G	rs61938198	12	95500635	7.20507e-11	3	rs61938198;rs7299457;rs7296348
681	416	12:95564940:A:G	rs7136350	12	95564940	1.56117e-10	1	rs7136350
682	417	12:95984678:C:T	rs7973435	12	95984678	8.54501e-09	1	rs7973435
683	418	12:101289022:C:T	rs117151964	12	101289022	1.49976e-08	1	rs117151964
684	419	12:102326461:A:C	rs11111090	12	102326461	1.74112e-35	10	rs11111090;rs4764822;rs12368928;rs10778159;rs4622329;rs4764850;rs7978834;rs4764683;rs10860823;rs11833310
685	419	12:102846020:A:G	rs11111278	12	102846020	1.21386e-25	10	rs11111278;rs10860838;rs10745936;rs117465339;rs12308006;rs10860851;rs11111247;rs2288378;rs80076418;rs78177771
686	420	12:106364743:G:T	rs1862026	12	106364743	9.07546e-09	2	rs1862026;rs2193761
687	420	12:106443134:C:T	rs880298	12	106443134	5.40099e-11	6	rs880298;rs12369969;rs3782690;rs1896364;rs2059769;rs3782695
688	420	12:106476805:C:T	rs12146713	12	106476805	5.17698e-155	10	rs12146713;rs2193761;rs73192197;rs12369969;rs75436288;rs1427793;rs3782690;rs74682327;rs1896364;rs2059769
689	420	12:106842558:C:T	rs11112997	12	106842558	1.70347e-09	1	rs11112997
690	420	12:107052620:A:G	rs7958469	12	107052620	1.82217e-11	5	rs7958469;rs12372133;rs10778511;rs10861679;rs4964502
691	421	12:109039869:C:T	rs2111211	12	109039869	4.01363e-12	2	rs2111211;rs11114051
692	422	12:109989228:G:T	rs12321904	12	109989228	2.46771e-08	1	rs12321904
693	423	12:112007756:C:T	rs653178	12	112007756	8.42912e-20	3	rs653178;rs7296313;rs7978851
694	424	12:120705828:A:C	rs3956833	12	120705828	1.36418e-09	2	rs3956833;rs147698620
695	425	12:123657338:C:T	rs2049114	12	123657338	4.87914e-09	1	rs2049114
696	426	12:130565998:C:T	rs861162	12	130565998	1.31541e-08	1	rs861162
697	427	12:133688707:C:T	rs11147235	12	133688707	3.57341e-12	1	rs11147235
698	428	13:22190518:A:T	rs2798259	13	22190518	2.58716e-09	1	rs2798259
699	429	13:22991579:C:T	rs55736210	13	22991579	2.68102e-15	2	rs55736210;rs2202729
700	430	13:36544904:C:T	rs1022946	13	36544904	9.84699e-09	2	rs1022946;rs1936004
701	431	13:40744051:A:G	rs17591848	13	40744051	8.83943e-09	1	rs17591848
702	432	13:43153869:A:T	rs117543324	13	43153869	5.17864e-11	1	rs117543324
703	433	13:44844873:A:T	rs7996699	13	44844873	2.2993e-08	1	rs7996699
704	434	13:47166195:C:T	rs1123028	13	47166195	2.263e-25	9	rs1123028;rs7319949;rs754106;rs1570621;rs9534450;rs7993645;rs41284185;rs842384;rs7331562
705	435	13:49869737:C:G	rs17478715	13	49869737	3.1943e-08	1	rs17478715
706	436	13:50941345:A:G	rs2532964	13	50941345	2.58815e-08	1	rs2532964
707	436	13:51164719:A:C	rs1239684	13	51164719	9.87343e-17	3	rs1239684;rs3118904;rs1239685
708	437	13:80191873:C:T	rs9545155	13	80191873	1.38649e-16	4	rs9545155;rs6563113;rs2146593;rs9318650
709	438	13:81298245:C:G	rs9545540	13	81298245	1.92334e-11	4	rs9545540;rs17072977;rs1176297;rs12866773
710	439	13:99639173:A:G	rs72651859	13	99639173	3.80457e-13	1	rs72651859
711	440	13:100393168:A:T	rs12584833	13	100393168	1.01304e-09	1	rs12584833
712	440	13:100612878:A:G	rs35486709	13	100612878	3.1941e-09	1	rs35486709
713	440	13:100967869:G:T	rs12860027	13	100967869	2.77351e-18	9	rs12860027;rs9518015;rs1283357;rs681561;rs55781196;rs36006722;rs2254579;rs2783212;rs9518075
714	441	13:103940450:A:G	rs2699315	13	103940450	2.85441e-09	1	rs2699315
715	442	13:107371135:G:T	rs79977118	13	107371135	3.46985e-11	1	rs79977118
716	442	13:107436448:C:T	rs9558862	13	107436448	3.51815e-08	1	rs9558862
717	443	14:21567489:A:G	rs1952512	14	21567489	4.95324e-08	1	rs1952512
718	444	14:24887101:C:T	rs72694396	14	24887101	8.66667e-11	2	rs72694396;rs7143804
719	445	14:29702590:G:T	rs12887636	14	29702590	1.51719e-09	1	rs12887636
720	446	14:31375322:A:T	rs766146	14	31375322	1.58427e-22	3	rs766146;rs8022032;rs72670321
721	447	14:50655307:C:T	rs61755579	14	50655307	9.99925e-10	2	rs61755579;rs72681869
722	447	14:51154362:A:G	rs12323717	14	51154362	3.13147e-09	1	rs12323717
723	448	14:53964998:A:T	rs4901427	14	53964998	2.9658e-27	5	rs4901427;rs17253263;rs4898805;rs74052962;rs61987600
724	449	14:54417522:A:G	rs17563	14	54417522	1.64701e-23	4	rs17563;rs12587398;rs762643;rs762642
725	449	14:54777745:A:G	rs7147119	14	54777745	9.33989e-19	9	rs7147119;rs1957638;rs2065999;rs6572941;rs1187426;rs7159652;rs7154152;rs10143482;rs61983959
726	449	14:54838137:C:T	rs67627942	14	54838137	7.25357e-18	2	rs67627942;rs4901515
727	450	14:58846731:A:G	rs8004077	14	58846731	3.17845e-08	3	rs8004077;rs6573206;rs10145711
728	450	14:59074136:A:C	rs160459	14	59074136	2.84536e-48	8	rs160459;rs6573206;rs10145711;rs3850301;rs187321;rs1742882;rs160468;rs221327
729	451	14:59628609:C:T	rs74826997	14	59628609	8.44117e-105	25	rs74826997;rs10135369;rs8021598;rs55633651;rs17095711;rs4898978;rs9323338;rs4258526;rs8006768;rs76119478;rs11158250;rs2053300;rs1252914;rs4533186;rs55760851;rs8016570;rs76558755;rs61986057;rs941882;rs61984497;rs61984498;rs10083442;rs61985465;rs113008896;rs10142337
730	451	14:59665286:A:G	rs1252992	14	59665286	1.06954e-23	14	rs1252992;rs55633651;rs8004283;rs11158249;rs11158250;rs2053300;rs1252914;rs34684201;rs17095965;rs4898984;rs941882;rs61984497;rs55863633;rs10142337
731	451	14:59802834:A:T	rs10137266	14	59802834	4.32092e-09	17	rs10137266;rs11158249;rs4258526;rs8006768;rs34684201;rs4533186;rs8016570;rs76558755;rs17095965;rs61986057;rs61984497;rs61984498;rs1253194;rs61985465;rs113008896;rs1262133;rs10147008
732	451	14:59830931:A:G	rs1253036	14	59830931	2.23456e-22	13	rs1253036;rs12880248;rs10083442;rs1253194;rs12590921;rs1269950;rs12587163;rs55863633;rs1262133;rs3736994;rs10147008;rs11158263;rs8008450
733	452	14:61081961:G:T	rs10143831	14	61081961	2.53369e-10	1	rs10143831
734	452	14:61241836:A:G	rs4151183	14	61241836	1.05742e-09	1	rs4151183
735	453	14:68545648:A:C	rs10140420	14	68545648	1.19585e-08	2	rs10140420;rs28585636
736	453	14:68922455:A:T	rs2253636	14	68922455	8.47194e-13	3	rs2253636;rs28585636;rs17105586
737	453	14:68994140:C:G	rs12889251	14	68994140	2.22064e-14	2	rs12889251;rs61986943
738	454	14:75429593:A:G	rs10162358	14	75429593	1.20786e-18	9	rs10162358;rs7154563;rs12435583;rs7146395;rs3213716;rs722685;rs4899539;rs175085;rs175505
739	455	14:85720403:C:T	rs8013627	14	85720403	4.82426e-09	2	rs8013627;rs67159282
740	455	14:85984904:A:G	rs1884008	14	85984904	2.11556e-08	1	rs1884008
741	456	14:91964683:A:G	rs7153849	14	91964683	2.82546e-12	4	rs7153849;rs61988439;rs1285848;rs10139287
742	457	14:92427222:A:C	rs7153027	14	92427222	1.65151e-16	4	rs7153027;rs10146335;rs2277526;rs6575228
743	458	14:93118229:C:T	rs117068593	14	93118229	1.19353e-14	4	rs117068593;rs10146346;rs78242330;rs7151531
744	459	14:94844947:C:T	rs28929474	14	94844947	2.06093e-09	1	rs28929474
745	460	14:98400416:A:C	rs2607053	14	98400416	2.45424e-10	4	rs2607053;rs2859997;rs61978014;rs4551970
746	460	14:98641215:A:G	rs7152530	14	98641215	1.11278e-10	3	rs7152530;rs2859997;rs28740872
747	460	14:98881995:C:T	rs1903123	14	98881995	1.72761e-08	1	rs1903123
748	461	14:99712032:A:G	rs35604463	14	99712032	4.02649e-12	3	rs35604463;rs3850422;rs2614471
749	461	14:99750164:C:T	rs2496482	14	99750164	8.09488e-13	2	rs2496482;rs7157001
750	462	14:100263611:G:T	rs10151665	14	100263611	3.67883e-12	2	rs10151665;rs12896749
751	462	14:100378941:A:G	rs12436192	14	100378941	1.73917e-14	2	rs12436192;rs10150279
752	463	14:104186876:A:G	rs10143623	14	104186876	1.97619e-11	3	rs10143623;rs11622835;rs62006272
753	464	15:37296427:A:C	rs9920759	15	37296427	2.62414e-08	1	rs9920759
754	465	15:39056550:A:T	rs10459670	15	39056550	4.43292e-14	3	rs10459670;rs7496143;rs8037776
755	465	15:39248441:C:T	rs4924314	15	39248441	1.04279e-08	1	rs4924314
756	465	15:39377736:C:T	rs8026370	15	39377736	1.09451e-24	4	rs8026370;rs56905145;rs7162018;rs2673100
757	465	15:39585032:A:G	rs12909502	15	39585032	2.54022e-09	5	rs12909502;rs12595668;rs59203590;rs10851383;rs16968876
758	465	15:39633904:A:G	rs2033939	15	39633904	1.82153e-145	11	rs2033939;rs77470370;rs12595668;rs62002280;rs59203590;rs10851383;rs17621729;rs72722978;rs1822105;rs16968876;rs34680120
759	466	15:45460602:A:C	rs74011382	15	45460602	9.16967e-11	1	rs74011382
760	467	15:48810499:G:T	rs7184016	15	48810499	7.09673e-12	3	rs7184016;rs4374113;rs893160
761	468	15:55965521:C:T	rs28556884	15	55965521	3.30547e-18	7	rs28556884;rs12909497;rs680556;rs654844;rs934886;rs12438177;rs12900119
762	468	15:56112714:A:C	rs1104848	15	56112714	3.52984e-13	2	rs1104848;rs1104846
763	469	15:58250246:G:T	rs3784264	15	58250246	2.14443e-82	11	rs3784264;rs12148525;rs28647249;rs1966755;rs79060358;rs12901462;rs17820966;rs4646572;rs11635486;rs8035539;rs12906402
764	470	15:63327605:C:T	rs4775606	15	63327605	8.86748e-12	2	rs4775606;rs8026047
765	471	15:68518304:A:G	rs12438246	15	68518304	9.99632e-11	1	rs12438246
766	471	15:68628163:C:T	rs2306022	15	68628163	2.51445e-33	2	rs2306022;rs7168069
767	471	15:68636397:A:G	rs1380883	15	68636397	2.5836e-08	2	rs1380883;rs7168069
768	472	15:70718561:A:G	rs11638607	15	70718561	1.57576e-08	1	rs11638607
769	473	15:71628256:G:T	rs1473608	15	71628256	3.79303e-11	1	rs1473608
770	474	15:73431600:G:T	rs2415142	15	73431600	2.60605e-08	1	rs2415142
771	475	15:75079474:A:G	rs34933034	15	75079474	1.99337e-11	3	rs34933034;rs11852760;rs12442901
772	476	15:84573248:A:G	rs7178962	15	84573248	1.23145e-19	12	rs7178962;rs2732162;rs1365198;rs1863449;rs35946026;rs8035886;rs5015595;rs11853949;rs58994367;rs143253231;rs62025857;rs2135877
773	477	15:85693016:A:G	rs2342118	15	85693016	1.19577e-10	1	rs2342118
774	478	15:87987517:C:T	rs1036809	15	87987517	4.38356e-14	2	rs1036809;rs12440158
775	479	15:89942331:C:G	rs208827	15	89942331	1.23345e-08	1	rs208827
776	480	15:91426560:A:G	rs4702	15	91426560	1.46505e-22	4	rs4702;rs74869799;rs6226;rs6227
777	481	15:95290678:A:G	rs755359	15	95290678	1.9245e-10	1	rs755359
778	482	15:99248018:C:T	rs4966014	15	99248018	2.02741e-08	1	rs4966014
779	483	15:101778710:A:C	rs8033360	15	101778710	7.45402e-13	2	rs8033360;rs11630832
780	484	16:381589:C:T	rs9929544	16	381589	5.16761e-10	1	rs9929544
781	485	16:1591112:G:T	rs2076442	16	1591112	1.6852e-08	2	rs2076442;rs6600160
782	485	16:1823444:C:G	rs761065	16	1823444	1.92207e-10	1	rs761065
783	485	16:2155297:A:G	rs9934488	16	2155297	4.04911e-14	4	rs9934488;rs2369090;rs1800718;rs2549677
784	486	16:4334962:A:C	rs72766530	16	4334962	5.50214e-20	5	rs72766530;rs8052185;rs2386887;rs9921192;rs3848370
785	486	16:4596041:C:G	rs12925448	16	4596041	2.31284e-08	1	rs12925448
786	487	16:24842818:C:G	rs71391580	16	24842818	2.68228e-11	2	rs71391580;rs9927676
787	488	16:28826307:A:G	rs62036616	16	28826307	1.03328e-09	1	rs62036616
788	489	16:30141985:C:T	rs55732507	16	30141985	1.58221e-09	3	rs55732507;rs3935873;rs3574
789	490	16:30835963:A:G	rs6565207	16	30835963	3.17663e-08	1	rs6565207
790	491	16:49590832:C:T	rs76634758	16	49590832	7.64516e-10	3	rs76634758;rs117861157;rs11864769
791	492	16:51181735:C:T	rs6416794	16	51181735	2.81281e-14	3	rs6416794;rs62039688;rs4306507
792	492	16:51451683:C:T	rs17616633	16	51451683	7.17476e-18	5	rs17616633;rs10521240;rs41318749;rs12445948;rs1345467
793	493	16:52583143:C:T	rs4784226	16	52583143	2.30212e-11	1	rs4784226
794	494	16:54291727:C:T	rs75837247	16	54291727	1.95255e-08	2	rs75837247;rs59021949
795	495	16:55071983:A:G	rs8050357	16	55071983	8.56666e-09	1	rs8050357
796	496	16:65065307:A:G	rs62042237	16	65065307	2.26526e-13	2	rs62042237;rs2088285
797	497	16:69843357:A:G	rs12919094	16	69843357	4.7811e-16	8	rs12919094;rs77503552;rs56096139;rs3169315;rs12933210;rs11075745;rs2362644;rs57613728
798	498	16:70660243:A:G	rs13330163	16	70660243	3.24092e-08	1	rs13330163
799	499	16:77320605:A:G	rs12921392	16	77320605	8.69198e-14	2	rs12921392;rs62044018
800	500	16:78205464:C:T	rs7206730	16	78205464	1.13136e-09	1	rs7206730
801	501	16:79158825:A:G	rs8047289	16	79158825	4.44615e-10	1	rs8047289
802	502	16:82126724:G:T	rs6564964	16	82126724	4.12743e-08	1	rs6564964
803	503	16:86609658:C:G	rs12445412	16	86609658	3.02653e-16	3	rs12445412;rs4843165;rs28589625
804	503	16:86714715:C:G	rs71390846	16	86714715	5.92976e-19	4	rs71390846;rs7188801;rs12919935;rs11864330
805	504	16:87086729:C:G	rs4491510	16	87086729	2.35272e-12	2	rs4491510;rs11117244
806	504	16:87141335:C:T	rs8044416	16	87141335	8.97767e-11	3	rs8044416;rs11117238;rs11117244
807	504	16:87180681:C:T	rs4843539	16	87180681	1.59227e-12	3	rs4843539;rs4843536;rs62043160
808	504	16:87184095:A:G	rs12051384	16	87184095	1.96477e-32	2	rs12051384;rs12051158
809	504	16:87184478:C:G	rs13337257	16	87184478	3.14434e-16	4	rs13337257;rs4843536;rs12051158;rs12444606
810	504	16:87206462:C:T	rs12445088	16	87206462	7.67402e-12	4	rs12445088;rs55679521;rs9783773;rs11864791
811	504	16:87225101:A:G	rs9937293	16	87225101	1.33495e-139	15	rs9937293;rs55679521;rs9783773;rs11864791;rs4843549;rs7500241;rs62056161;rs9940970;rs75675526;rs8061521;rs1966575;rs28758462;rs8050099;rs61284811;rs56744766
812	504	16:87230095:C:G	rs80008974	16	87230095	3.19153e-08	2	rs80008974;rs1966575
813	504	16:87357985:C:T	rs72804073	16	87357985	5.29725e-12	2	rs72804073;rs9940109
814	504	16:87360627:A:G	rs3748395	16	87360627	3.42807e-11	10	rs3748395;rs62056161;rs75675526;rs8061521;rs1966575;rs28758462;rs8050099;rs61284811;rs56744766;rs7206322
815	505	16:88292550:C:G	rs11646882	16	88292550	2.70497e-08	4	rs11646882;rs56124600;rs9930118;rs62049580
816	505	16:88298124:C:T	rs12447690	16	88298124	9.28288e-21	8	rs12447690;rs10163307;rs56124600;rs9930118;rs62049580;rs4352077;rs9932700;rs73256171
817	506	16:89403057:A:C	rs3096320	16	89403057	2.12654e-09	5	rs3096320;rs3829499;rs9931073;rs2437956;rs4785721
818	506	16:89939929:C:T	rs9939914	16	89939929	2.11035e-17	14	rs9939914;rs2437956;rs2434871;rs11645553;rs35432452;rs4785721;rs1558151;rs11076633;rs11644804;rs3212369;rs80049853;rs6500463;rs12921906;rs2241034
819	506	16:89992613:G:T	rs111398992	16	89992613	3.42564e-27	16	rs111398992;rs116918202;rs59806584;rs9673945;rs62068366;rs117990130;rs17232491;rs72813432;rs34242253;rs7192165;rs6500463;rs4785757;rs145943576;rs117306165;rs112579477;rs4785781
820	507	17:833790:G:T	rs11870439	17	833790	1.24579e-11	1	rs11870439
821	507	17:928078:A:G	rs2376600	17	928078	9.10107e-20	2	rs2376600;rs2586251
822	508	17:1940232:A:G	rs1131600	17	1940232	7.63004e-21	10	rs1131600;rs3752962;rs4790309;rs11650922;rs10852923;rs117104202;rs16952009;rs28611065;rs8081273;rs8081053
823	508	17:1978963:A:T	rs9303241	17	1978963	2.14736e-18	11	rs9303241;rs3752962;rs6503187;rs903158;rs4790309;rs8067305;rs2760748;rs7225843;rs11650922;rs2873195;rs16952009
824	508	17:2112567:C:T	rs12603057	17	2112567	2.68524e-37	13	rs12603057;rs2760748;rs7225843;rs2641436;rs2641431;rs2873195;rs10852923;rs2126202;rs16952009;rs9896317;rs28611065;rs8081273;rs8081053
825	508	17:2247982:C:T	rs12451892	17	2247982	2.57195e-08	9	rs12451892;rs4790309;rs8067305;rs11650922;rs10852923;rs16952009;rs28611065;rs8081273;rs8081053
826	508	17:2312130:A:G	rs8072179	17	2312130	2.49967e-08	3	rs8072179;rs2760748;rs9896317
827	508	17:2555592:C:T	rs7219015	17	2555592	2.91671e-08	1	rs7219015
828	509	17:7485583:C:T	rs62059826	17	7485583	1.3836e-08	1	rs62059826
829	509	17:7754993:A:G	rs12939056	17	7754993	1.25244e-10	1	rs12939056
830	510	17:9129198:A:G	rs66779318	17	9129198	4.41421e-09	3	rs66779318;rs9894834;rs3785994
831	510	17:9143864:A:G	rs1107361	17	9143864	4.46271e-23	4	rs1107361;rs9894834;rs3785994;rs8974
832	511	17:16092902:A:G	rs178816	17	16092902	4.06244e-08	1	rs178816
833	512	17:17736252:A:C	rs4925117	17	17736252	9.96276e-09	1	rs4925117
834	513	17:19890237:A:G	rs9907752	17	19890237	2.65212e-16	2	rs9907752;rs4925054
835	514	17:27948844:C:T	rs3760456	17	27948844	5.98547e-58	9	rs3760456;rs62068576;rs11657079;rs3110493;rs76726425;rs3794730;rs12602258;rs4436830;rs11656408
836	515	17:29605432:G:T	rs141448761	17	29605432	2.00016e-09	1	rs141448761
837	516	17:35257012:C:G	rs1874583	17	35257012	1.5804e-22	2	rs1874583;rs13380816
838	517	17:36639644:C:T	rs35457717	17	36639644	1.24433e-08	1	rs35457717
839	518	17:37468598:C:T	rs9913320	17	37468598	1.31812e-10	1	rs9913320
840	519	17:40722029:A:G	rs665268	17	40722029	1.00286e-13	2	rs665268;rs3826426
841	519	17:40911004:C:T	rs59795094	17	40911004	8.87606e-09	2	rs59795094;rs3826426
842	520	17:42326258:C:T	rs5033	17	42326258	1.48261e-17	3	rs5033;rs228767;rs4473241
843	520	17:42497074:A:G	rs117994523	17	42497074	1.05041e-09	3	rs117994523;rs138262388;rs117421612
844	520	17:43231991:G:T	rs12936466	17	43231991	5.15191e-17	6	rs12936466;rs6503416;rs12948326;rs2864881;rs3744760;rs7405669
845	520	17:43723929:A:G	rs364308	17	43723929	1.17051e-74	29	rs364308;rs117642368;rs62064594;rs61572747;rs1230077;rs62065454;rs1724422;rs113100008;rs9303521;rs7225384;rs7225082;rs12938031;rs34186148;rs4792880;rs173365;rs11079726;rs3785879;rs9899833;rs1560313;rs12947764;rs242557;rs2664006;rs754593;rs8079215;rs2471737;rs7225002;rs2016034;rs11653367;rs9910284
846	520	17:44793503:A:G	rs199439	17	44793503	1.87343e-62	23	rs199439;rs9303521;rs7225384;rs7225082;rs12938031;rs34186148;rs4792880;rs173365;rs11079726;rs3785879;rs9899833;rs1560313;rs12947764;rs242557;rs2664006;rs754593;rs2471737;rs7225002;rs2016034;rs11653367;rs9910284;rs147382204;rs1563304
847	520	17:44794558:C:G	rs12951057	17	44794558	5.09707e-74	17	rs12951057;rs4458044;rs2664008;rs11079727;rs3785879;rs12947764;rs242557;rs754593;rs2471738;rs11870844;rs7225002;rs9910284;rs147382204;rs11650531;rs3933653;rs78033733;rs79553110
848	520	17:44852612:A:C	rs62074125	17	44852612	1.3773e-17	14	rs62074125;rs11079726;rs1560313;rs2664006;rs754593;rs8079215;rs2471737;rs7225002;rs2016034;rs11653367;rs9910284;rs147382204;rs4968241;rs3851781
849	520	17:44901449:A:G	rs9890413	17	44901449	1.13976e-09	7	rs9890413;rs7225002;rs1563304;rs4968241;rs3933653;rs3851781;rs80335285
850	520	17:45363310:A:C	rs77089224	17	45363310	3.95316e-14	8	rs77089224;rs80335285;rs78033733;rs12451744;rs79553110;rs78054593;rs41457949;rs76586925
851	520	17:45575934:A:G	rs200908868	17	45575934	4.0496e-11	2	rs200908868;rs12451744
852	520	17:46517797:C:T	rs79275904	17	46517797	6.62048e-14	8	rs79275904;rs79553110;rs78054593;rs2525096;rs41457949;rs76586925;rs4534896;rs1062037
853	521	17:47448346:A:G	rs12952581	17	47448346	1.1157e-11	2	rs12952581;rs9893777
854	522	17:48208274:C:T	rs847682	17	48208274	1.07856e-08	1	rs847682
855	523	17:53157189:A:G	rs2628304	17	53157189	1.03418e-09	1	rs2628304
856	524	17:54248749:A:T	rs9897571	17	54248749	2.19162e-09	1	rs9897571
857	524	17:54389430:A:G	rs9904126	17	54389430	2.44108e-08	2	rs9904126;rs12450830
858	525	17:58046076:A:G	rs12453125	17	58046076	4.45813e-09	1	rs12453125
859	526	17:59013682:A:G	rs9913736	17	59013682	2.02639e-10	1	rs9913736
860	527	17:60637258:A:C	rs146385050	17	60637258	5.36428e-09	1	rs146385050
861	528	17:61188396:A:G	rs34536594	17	61188396	1.95257e-12	2	rs34536594;rs7224360
862	529	17:63294855:A:G	rs56299799	17	63294855	4.23138e-12	3	rs56299799;rs56083437;rs9904001
863	530	17:63914750:A:G	rs1420791	17	63914750	3.4118e-18	3	rs1420791;rs6504372;rs9906319
864	530	17:63959061:A:G	rs34965243	17	63959061	8.00352e-23	2	rs34965243;rs55788573
865	531	17:65989961:C:G	rs7502307	17	65989961	2.37564e-29	11	rs7502307;rs12602210;rs8079078;rs77706698;rs7208666;rs6504571;rs75544834;rs190151381;rs35531639;rs78578725;rs56058005
866	532	17:67607685:C:G	rs2947867	17	67607685	3.24204e-19	7	rs2947867;rs8076249;rs2252056;rs2905446;rs8066785;rs9901947;rs62083023
867	532	17:68059706:C:G	rs78074080	17	68059706	6.65561e-51	4	rs78074080;rs180163;rs9896706;rs4411538
868	532	17:68095619:G:T	rs724824	17	68095619	2.395e-09	2	rs724824;rs4411538
869	532	17:68216128:A:C	rs638538	17	68216128	3.69063e-11	2	rs638538;rs236529
870	533	17:68938038:G:T	rs8066734	17	68938038	3.30331e-10	2	rs8066734;rs9912494
871	533	17:69148558:A:T	rs11651501	17	69148558	5.97649e-11	2	rs11651501;rs11656479
872	534	17:69977371:A:G	rs35636999	17	69977371	4.09173e-10	1	rs35636999
873	534	17:70086597:G:T	rs9912029	17	70086597	2.71929e-12	1	rs9912029
874	534	17:70340305:A:T	rs4793283	17	70340305	2.76679e-08	1	rs4793283
875	535	17:71596344:C:G	rs28702062	17	71596344	2.19622e-09	1	rs28702062
876	536	17:75420165:C:T	rs8065422	17	75420165	8.73899e-09	1	rs8065422
877	537	17:79372489:C:T	rs11657730	17	79372489	1.32799e-09	2	rs11657730;rs34386017
878	538	18:8799828:C:T	rs568267	18	8799828	3.74723e-09	1	rs568267
879	539	18:19478155:G:T	rs8089932	18	19478155	3.41278e-24	11	rs8089932;rs8085654;rs78054198;rs2850576;rs73963238;rs11662591;rs9957695;rs4800334;rs4426446;rs16961918;rs8083660
880	539	18:19664098:A:G	rs9953528	18	19664098	7.76835e-10	5	rs9953528;rs4800334;rs4426446;rs16961918;rs8083660
881	540	18:20267190:C:T	rs34598648	18	20267190	3.6325e-08	1	rs34598648
882	541	18:34045251:A:G	rs1790643	18	34045251	9.44434e-15	2	rs1790643;rs1708706
883	541	18:34315711:C:T	rs12604388	18	34315711	3.3348e-09	1	rs12604388
884	542	18:40303789:C:T	rs12605254	18	40303789	5.99452e-15	2	rs12605254;rs602359
885	543	18:42430467:C:G	rs626498	18	42430467	4.57349e-17	4	rs626498;rs1004945;rs639964;rs9945057
886	544	18:44040660:C:T	rs17766830	18	44040660	2.12393e-08	1	rs17766830
887	545	18:53294569:C:T	rs644279	18	53294569	2.02786e-11	2	rs644279;rs12458015
888	546	18:57386391:A:G	rs870472	18	57386391	3.274e-21	3	rs870472;rs11152173;rs11661368
889	547	18:60054857:A:C	rs884205	18	60054857	6.15648e-10	1	rs884205
890	548	18:60895919:C:T	rs12970504	18	60895919	1.34346e-09	1	rs12970504
891	549	19:13109955:C:T	rs73006822	19	13109955	8.65955e-29	4	rs73006822;rs62109878;rs10413329;rs56252104
892	550	19:13934296:A:G	rs76549352	19	13934296	7.45089e-14	1	rs76549352
893	551	19:18020447:A:G	rs78990594	19	18020447	4.6189e-11	1	rs78990594
894	552	19:18459377:A:G	rs12459368	19	18459377	5.63578e-12	1	rs12459368
895	552	19:18548884:C:T	rs2303696	19	18548884	1.43673e-11	1	rs2303696
896	553	19:30855651:A:G	rs1125867	19	30855651	2.23913e-09	1	rs1125867
897	554	19:32200518:G:T	rs11669334	19	32200518	7.32688e-18	1	rs11669334
898	555	19:33525713:G:T	rs9749364	19	33525713	1.34965e-09	1	rs9749364
899	556	19:39173486:A:C	rs7254100	19	39173486	9.3072e-13	1	rs7254100
900	557	19:46234155:A:G	rs17878252	19	46234155	4.02688e-09	1	rs17878252
901	558	19:47772184:A:T	rs60202083	19	47772184	1.29687e-10	1	rs60202083
902	559	20:6591010:C:T	rs6038556	20	6591010	8.20516e-14	7	rs6038556;rs6117275;rs6054317;rs1321443;rs6054362;rs1884900;rs2145272
903	559	20:6613051:A:G	rs2024962	20	6613051	2.46277e-52	9	rs2024962;rs2210124;rs6117282;rs6054317;rs1321443;rs2104012;rs6054362;rs1884900;rs2145272
904	560	20:7103709:C:G	rs1159530	20	7103709	1.47148e-45	5	rs1159530;rs232657;rs232656;rs2013619;rs4140471
905	561	20:10489903:C:T	rs650225	20	10489903	7.12236e-17	5	rs650225;rs1232606;rs2423507;rs8708;rs7267595
906	561	20:10640042:C:T	rs17457340	20	10640042	4.30366e-10	4	rs17457340;rs34325313;rs7267595;rs6040095
907	561	20:10647679:A:G	rs1883801	20	10647679	1.1272e-17	5	rs1883801;rs7267595;rs6040076;rs6040095;rs6108676
908	561	20:10741175:A:T	rs6134023	20	10741175	2.2614e-20	1	rs6134023
909	561	20:10984609:C:G	rs6074226	20	10984609	1.11083e-08	1	rs6074226
910	561	20:11125164:A:G	rs8183005	20	11125164	4.63769e-12	1	rs8183005
911	561	20:11209119:A:G	rs6074263	20	11209119	2.27743e-10	1	rs6074263
912	561	20:11285932:A:G	rs6108906	20	11285932	3.91497e-30	7	rs6108906;rs6033091;rs6033100;rs932460;rs60776557;rs6074298;rs2423574
913	562	20:15783346:A:G	rs2876413	20	15783346	2.67994e-12	1	rs2876413
914	563	20:21951847:A:G	rs2207878	20	21951847	1.54877e-21	9	rs2207878;rs2224261;rs12479719;rs201558;rs6047866;rs6047901;rs804580;rs6137568;rs200366
915	564	20:33972948:A:G	rs4911180	20	33972948	3.72723e-32	7	rs4911180;rs7280;rs34298551;rs6058247;rs3790136;rs6142415;rs10211771
916	565	20:36843256:C:T	rs6069232	20	36843256	8.70549e-36	5	rs6069232;rs6069106;rs742415;rs17790174;rs760998
917	566	20:38552107:A:T	rs2224539	20	38552107	1.08019e-14	3	rs2224539;rs11086761;rs12481388
918	567	20:39832628:C:T	rs17265513	20	39832628	7.77333e-13	8	rs17265513;rs7274186;rs2179372;rs6065332;rs6072353;rs4518023;rs4810316;rs1010305
919	568	20:45549871:A:G	rs4810576	20	45549871	9.40035e-10	2	rs4810576;rs2868882
920	569	20:46367372:A:G	rs56374036	20	46367372	1.13734e-11	1	rs56374036
921	570	20:52448936:C:G	rs6097618	20	52448936	6.83117e-21	4	rs6097618;rs6097585;rs6022781;rs6064011
922	571	20:61154871:C:T	rs6062264	20	61154871	8.39454e-12	1	rs6062264
923	572	21:34169318:A:G	rs5843567	21	34169318	9.9101e-12	1	rs5843567
924	573	21:36439505:C:T	rs17812899	21	36439505	3.87618e-08	1	rs17812899
925	574	21:39881848:C:T	rs9305650	21	39881848	7.93613e-15	4	rs9305650;rs13047775;rs1573331;rs2836489
926	575	22:18294704:A:G	rs432775	22	18294704	3.75842e-10	2	rs432775;rs2587107
927	576	22:21026003:A:G	rs552668	22	21026003	3.81766e-12	3	rs552668;rs180814;rs110374
928	577	22:28709058:C:T	rs143032062	22	28709058	2.40147e-11	1	rs143032062
929	577	22:28945515:A:T	rs5762680	22	28945515	6.33073e-09	1	rs5762680
930	578	22:30238317:A:T	rs1076135	22	30238317	1.3834e-14	4	rs1076135;rs140098;rs140125;rs5763688
931	579	22:30953295:C:T	rs2267161	22	30953295	9.23409e-12	1	rs2267161
932	580	22:38140352:G:T	rs4239889	22	38140352	7.47643e-19	6	rs4239889;rs62236744;rs4820299;rs710187;rs13911;rs139902
933	581	22:40676986:A:T	rs5750929	22	40676986	2.85274e-15	1	rs5750929
934	582	22:45732328:A:G	rs11704481	22	45732328	1.03666e-09	2	rs11704481;rs6006984
935	582	22:45983415:C:T	rs5765512	22	45983415	4.18926e-08	1	rs5765512
936	583	22:46394073:C:T	rs28370276	22	46394073	2.65469e-08	1	rs28370276
937	584	22:46760481:C:G	rs9615351	22	46760481	1.71855e-11	2	rs9615351;rs8136628
938	585	22:50317296:C:T	rs7410612	22	50317296	8.15243e-11	1	rs7410612
939	586	22:50722408:C:T	rs79966207	22	50722408	8.70152e-12	1	rs79966207

## Sheet: Table S7
Table S7 | Overlap of UDIP-FA–associated SNPs with the GWAS Catalog
GenomicLocus		chr	bp	snp	DateAddedToCatalog	PMID	FirstAuth	Date	Journal	Link	Study	Trait	InitialN	ReplicationN	Region	ReportedGene	MappedGene	UpGene	DownGene	SNP_Gene_ID	UpGeneDist	DownGeneDist	Strongest	SNPs	marged	SNP_ID_cur	Context	intergenic	RiskAF	P	Pmlog	Ptext	OrBeta	95CI	Platform	CNV
1	rs2235537	1	1680219	rs1014988	2019-03-07	30578418	Giri A	2018-12-21	Nat Genet	www.ncbi.nlm.nih.gov/pubmed/30578418	Trans-ethnic association study of blood pressure determinants in over 750,000 individuals.	Systolic blood pressure	365,998 European ancestry individuals, 63,490 African ancestry individuals, 22,802 Hispanic individuals, 4,792 Asian ancestry individuals, 2,695 Native American ancestry individuals	299,024 European ancestry individuals, 17,277 individuals	1p36.33	NADK	SLC35E2A - NADK	ENSG00000215790	ENSG00000008130		2788	2452	rs1014988-A	rs1014988	0	1014988	intergenic_variant	1	0.4781	2e-09	8.69897		0.2039	[0.14-0.27] mmHg decrease	Affymetrix [NR] (imputed)	N
1	rs2235537	1	1681265	rs494264	2021-12-14	34594039	Sakaue S	2021-09-30	Nat Genet	www.ncbi.nlm.nih.gov/pubmed/34594039	A cross-population atlas of genetic associations for 220 human phenotypes.	Systolic blood pressure	340,159 European ancestry individuals, 145,505 East Asian ancestry individuals	NA	1p36.33		SLC35E2A - NADK	ENSG00000215790	ENSG00000008130		3834	1406	rs494264-G	rs494264	0	494264	intergenic_variant	1	NR	3e-11	10.5229		0.0129	[0.0092-0.0166] unit decrease	Affymetrix, Illumina [20537302] (imputed)	N
1	rs2235537	1	1683900	rs1062090	2022-08-24	35762941	Plotnikov D	2022-06-01	Invest Ophthalmol Vis Sci	www.ncbi.nlm.nih.gov/pubmed/35762941	High Blood Pressure and Intraocular Pressure: A Mendelian Randomization Study.	Pulse pressure	526,001 European ancestry individuals	NA	1p36.33		NADK			ENSG00000008130	NA	NA	rs1062090-A	rs1062090	0	1062090	3_prime_UTR_variant	0	NR	4e-14	13.3979		0.2004	[0.15-0.25] unit decrease	NR [NR] (imputed)	N
1	rs2235537	1	1684800	rs2072927	2022-08-24	35762941	Plotnikov D	2022-06-01	Invest Ophthalmol Vis Sci	www.ncbi.nlm.nih.gov/pubmed/35762941	High Blood Pressure and Intraocular Pressure: A Mendelian Randomization Study.	Systolic blood pressure	526,001 European ancestry individuals	NA	1p36.33		NADK			ENSG00000008130	NA	NA	rs2072927-A	rs2072927	0	2072927	intron_variant	0	NR	9e-17	16.0458		0.3173	[0.24-0.39] unit decrease	NR [NR] (imputed)	N
1	rs2235537	1	1686040	rs4751	2019-03-25	30804566	Lane JM	2019-02-25	Nat Genet	www.ncbi.nlm.nih.gov/pubmed/30804566	Biological and clinical insights from genetics of insomnia symptoms.	Insomnia symptoms (never/rarely vs. usually)	129,270 European ancestry cases, 108,357 European ancestry controls	17,140 European ancestry cases, 61,850 European ancestry controls	1p36.33	NADK	NADK			ENSG00000008130	NA	NA	rs4751-T	rs4751	0	4751	missense_variant	0	0.425368	9e-09	8.04576		1.02	[1.01-1.03]	Affymetrix [14661600] (imputed)	N
1	rs2235537	1	1687482	rs2076328	2019-02-08	30595370	Kichaev G	2018-12-27	Am J Hum Genet	www.ncbi.nlm.nih.gov/pubmed/30595370	Leveraging Polygenic Functional Enrichment to Improve GWAS Power.	Systolic blood pressure	approximately 422,000 European ancestry individuals	NA	1p36.33		NADK			ENSG00000008130	NA	NA	rs2076328-?	rs2076328	0	2076328	non_coding_transcript_exon_variant	0	NR	2e-23	22.699		NA		NR [~ 8900000] (imputed)	N
1	rs2235537	1	1692321	rs1107910	2020-09-18	32888494	Vuckovic D	2020-09-01	Cell	www.ncbi.nlm.nih.gov/pubmed/32888494	The Polygenic and Monogenic Basis of Blood Traits and Diseases.	Reticulocyte count	408,112 British individuals	NA	1p36.33	NADK	NADK			ENSG00000008130	NA	NA	rs1107910-C	rs1107910	0	1107910	intron_variant	0	0.450915	5e-10	9.30103		0.0139852	[0.0096-0.0184] unit decrease	Affymetrix [93095623] (imputed)	N
1	rs2235537	1	1692321	rs1107910	2020-09-18	32888494	Vuckovic D	2020-09-01	Cell	www.ncbi.nlm.nih.gov/pubmed/32888494	The Polygenic and Monogenic Basis of Blood Traits and Diseases.	Reticulocyte fraction of red cells	408,112 British individuals	NA	1p36.33	NADK	NADK			ENSG00000008130	NA	NA	rs1107910-C	rs1107910	0	1107910	intron_variant	0	0.45092	1e-09	9		0.0137408	[0.0093-0.0181] unit decrease	Affymetrix [93095623] (imputed)	N
1	rs2235537	1	1693726	rs17162854	2020-11-30	32916098	Verweij N	2020-09-02	Cell Syst	www.ncbi.nlm.nih.gov/pubmed/32916098	The Genetic Makeup of the Electrocardiogram.	Electrocardiogram morphology (amplitude at temporal datapoints)	63,706 European and unknown ancestry individuals	NA	1p36.33	NADK	NADK			ENSG00000008130	NA	NA	rs17162854-A	rs17162854	0	17162854	intron_variant	0	0.500138	4e-08	7.39794	(116 ms)	0.0304694	[0.02-0.041] unit decrease	Affymetrix [10000000] (imputed)	N
1	rs2235537	1	1693726	rs17162854	2020-11-30	32916098	Verweij N	2020-09-02	Cell Syst	www.ncbi.nlm.nih.gov/pubmed/32916098	The Genetic Makeup of the Electrocardiogram.	Electrocardiogram morphology (amplitude at temporal datapoints)	63,706 European and unknown ancestry individuals	NA	1p36.33	NADK	NADK			ENSG00000008130	NA	NA	rs17162854-A	rs17162854	0	17162854	intron_variant	0	0.500138	2e-08	7.69897	(156 ms)	0.0312028	[0.02-0.042] unit decrease	Affymetrix [10000000] (imputed)	N
1	rs2235537	1	1693726	rs17162854	2020-11-30	32916098	Verweij N	2020-09-02	Cell Syst	www.ncbi.nlm.nih.gov/pubmed/32916098	The Genetic Makeup of the Electrocardiogram.	Electrocardiogram morphology (amplitude at temporal datapoints)	63,706 European and unknown ancestry individuals	NA	1p36.33	NADK	NADK			ENSG00000008130	NA	NA	rs17162854-A	rs17162854	0	17162854	intron_variant	0	0.500138	6e-09	8.22185	(118 ms)	0.0325861	[0.022-0.043] unit decrease	Affymetrix [10000000] (imputed)	N
1	rs2235537	1	1702436	rs12040325	2019-02-08	30593698	Hubel C	2018-12-28	Am J Med Genet B Neuropsychiatr Genet	www.ncbi.nlm.nih.gov/pubmed/30593698	Genomics of body fat percentage may contribute to sex bias in anorexia nervosa.	Fat-free mass	70,700 European ancestry female individuals, 85,261 European ancestry male individuals	NA	1p36.33	NR	NADK			ENSG00000008130	NA	NA	rs12040325-?	rs12040325	0	12040325	intron_variant	0	NR	1e-07	7	(female)	0.12792	[0.081-0.175] unit increase	Affymetrix [7794483] (imputed)	N
1	rs2235537	1	1702436	rs12040325	2019-02-08	30593698	Hubel C	2018-12-28	Am J Med Genet B Neuropsychiatr Genet	www.ncbi.nlm.nih.gov/pubmed/30593698	Genomics of body fat percentage may contribute to sex bias in anorexia nervosa.	Fat-free mass	70,700 European ancestry female individuals, 85,261 European ancestry male individuals	NA	1p36.33	NR	NADK			ENSG00000008130	NA	NA	rs12040325-?	rs12040325	0	12040325	intron_variant	0	NR	7e-08	7.1549		0.11874	[0.076-0.162] unit increase	Affymetrix [7794483] (imputed)	N
1	rs2235537	1	1708801	rs12044597	2017-10-27	28892062	Akiyama M	2017-09-11	Nat Genet	www.ncbi.nlm.nih.gov/pubmed/28892062	Genome-wide association study identifies 112 new loci for body mass index in the Japanese population.	Body mass index	up to 72,390 Japanese ancestry women, up to 85,894 Japanese ancestry men	up to 10,048 Japanese ancestry women, up to 5,098 Japanese ancestry men, up to 181,999 European ancestry women, up to 140,155 European ancestry controls	1p36.33	NADK	NADK			ENSG00000008130	NA	NA	rs12044597-G	rs12044597	0	12044597	intron_variant	0	0.51	2e-09	8.69897		0.014	[0.01-0.018] unit increase	Illumina [6108953] (imputed)	N
1	rs2235537	1	1708801	rs12044597	2021-12-14	34594039	Sakaue S	2021-09-30	Nat Genet	www.ncbi.nlm.nih.gov/pubmed/34594039	A cross-population atlas of genetic associations for 220 human phenotypes.	Weight	360,116 European ancestry individuals, 165,419 East Asian ancestry individuals	NA	1p36.33		NADK			ENSG00000008130	NA	NA	rs12044597-G	rs12044597	0	12044597	intron_variant	0	NR	3e-11	10.5229		0.011	[0.0079-0.0141] unit increase	Affymetrix, Illumina [20539548] (imputed)	N
1	rs2235537	1	1723031	rs9660180	2016-01-27	25673413	Locke AE	2015-02-12	Nature	www.ncbi.nlm.nih.gov/pubmed/25673413	Genetic studies of body mass index yield new insights for obesity biology.	Body mass index	up to 104,666 European ancestry male individuals, up to 132,115 European ancestry female individuals, 370 African American male individuals, 517 African American female individuals, 512 Hispanic male individuals, 764 Hispanic female individuals	up to 48,274 European ancestry male individuals, up to 39,864 European ancestry female individuals, 2,441 African American or Afro-Caribbean male individuals, 6,314 African American or Afro-Caribbean female individuals, 919 Filipino male individuals, 828 Filipino female individuals, 205 Seychellois male individuals, 287 Seychellois female individuals, 2,964 South Asian ancestry male individuals, …	1p36.33	GNB1	GNB1			ENSG00000078369	NA	NA	rs9660180-A	rs9660180	0	9660180	intron_variant	0	0.499	8e-07	6.09691	(EA)	0.017	[0.01-0.024] kg/m2 increase	Affymetrix, Illumina [2550021]	N
1	rs2235537	1	1723031	rs9660180	2016-01-27	25673413	Locke AE	2015-02-12	Nature	www.ncbi.nlm.nih.gov/pubmed/25673413	Genetic studies of body mass index yield new insights for obesity biology.	Body mass index	up to 104,666 European ancestry male individuals, up to 132,115 European ancestry female individuals, 370 African American male individuals, 517 African American female individuals, 512 Hispanic male individuals, 764 Hispanic female individuals	up to 48,274 European ancestry male individuals, up to 39,864 European ancestry female individuals, 2,441 African American or Afro-Caribbean male individuals, 6,314 African American or Afro-Caribbean female individuals, 919 Filipino male individuals, 828 Filipino female individuals, 205 Seychellois male individuals, 287 Seychellois female individuals, 2,964 South Asian ancestry male individuals, …	1p36.33	GNB1	GNB1			ENSG00000078369	NA	NA	rs9660180-A	rs9660180	0	9660180	intron_variant	0	0.491	6e-07	6.22185		0.016	[0.0099-0.0229] kg/m2 increase	Affymetrix, Illumina [2550021]	N
1	rs2235537	1	1728969	rs12034740	2022-07-01	35361970	Okbay A	2022-03-31	Nat Genet	www.ncbi.nlm.nih.gov/pubmed/35361970	Polygenic prediction of educational attainment within and between families from genome-wide association analyses in 3 million individuals.	Educational attainment	3,037,499 European ancestry individuals	NA	1p36.33		GNB1			ENSG00000078369	NA	NA	rs12034740-A	rs12034740	0	12034740	intron_variant	0	0.4987	1e-11	11		0.00711399	[0.0051-0.0092] unit increase	Illumina [10675380] (imputed)	N
1	rs2235537	1	1740255	rs7546498	2019-02-10	27841878	Hoffmann TJ	2016-11-14	Nat Genet	www.ncbi.nlm.nih.gov/pubmed/27841878	Genome-wide association analyses using electronic health records identify new loci influencing blood pressure variation.	Systolic blood pressure	295,529 European ancestry individuals, 8,231 Latino individuals, 3,058 African American individuals, 2,029 African British individuals, 7,701 East Asian ancestry individuals, 2,735 South Asian ancestry individuals, 1,979 mixed and unknown ancestry individuals	NA	1p36.33	GNB1	GNB1			ENSG00000078369	NA	NA	rs7546498-G	rs7546498	0	7546498	intron_variant	0		3e-11	10.5229		0.257	unit increase	Affymetrix [at least 2696785] (imputed)	N
1	rs2235537	1	1740255	rs7546498	2019-02-10	27841878	Hoffmann TJ	2016-11-14	Nat Genet	www.ncbi.nlm.nih.gov/pubmed/27841878	Genome-wide association analyses using electronic health records identify new loci influencing blood pressure variation.	Diastolic blood pressure	295,529 European ancestry individuals, 8,231 Latino individuals, 3,058 African American individuals, 2,029 African British individuals, 7,701 East Asian ancestry individuals, 2,735 South Asian ancestry individuals, 1,979 mixed and unknown ancestry individuals	NA	1p36.33	GNB1	GNB1			ENSG00000078369	NA	NA	rs7546498-G	rs7546498	0	7546498	intron_variant	0		5e-10	9.30103		0.147	unit increase	Affymetrix [at least 2696785] (imputed)	N
1	rs2235537	1	1776269	rs4648727	2022-02-15	35078996	Gudjonsson A	2022-01-25	Nat Commun	www.ncbi.nlm.nih.gov/pubmed/35078996	A genome-wide association study of serum proteins reveals shared loci with common diseases.	Serum levels of protein NADK	5,361 Icelandic ancestry individuals	NA	1p36.33		GNB1			ENSG00000078369	NA	NA	rs4648727-A	rs4648727	0	4648727	intron_variant	0	0.4714	1e-17	17		0.159103	[0.12-0.2] unit decrease	Illumina [7506463] (imputed)	N
1	rs2235537	1	1776269	rs4648727	2021-12-14	34594039	Sakaue S	2021-09-30	Nat Genet	www.ncbi.nlm.nih.gov/pubmed/34594039	A cross-population atlas of genetic associations for 220 human phenotypes.	Hemoglobin	350,474 European ancestry individuals, 152,447 East Asian ancestry individuals	NA	1p36.33		GNB1			ENSG00000078369	NA	NA	rs4648727-A	rs4648727	0	4648727	intron_variant	0	NR	6e-10	9.22185		0.0102	[0.0071-0.0133] unit decrease	Affymetrix, Illumina [20538521] (imputed)	N
1	rs2235537	1	1831012	rs7542410	2022-11-17	34887591	Graham SE	2021-12-09	Nature	www.ncbi.nlm.nih.gov/pubmed/34887591	The power of genetic diversity in genome-wide association studies of lipids.	High density lipoprotein cholesterol levels	40,963 South Asian ancestry individuals, 48,057 Hispanic individuals, 99,432 Admixed African or African ancestry individuals, 146,492 East Asian ancestry individuals, 1,320,016 European ancestry individuals	NA	1p36.33		GNB1 - CALML6	ENSG00000078369	ENSG00000169885		8456	15535	rs7542410-?	rs7542410	0	7542410	TF_binding_site_variant	1	NR	3e-08	7.52288		NA		NR [52000000] (imputed)	N
1	rs2235537	1	1846073	rs2803298	2019-11-05	30239722	Pulit SL	2018-09-14	Hum Mol Genet	www.ncbi.nlm.nih.gov/pubmed/30239722	Meta-analysis of genome-wide association studies for body fat distribution in 694,649 individuals of European ancestry.	Body mass index	434,794 European ancestry female individuals	NA	1p36.33	NA	GNB1 - CALML6	ENSG00000078369	ENSG00000169885		23517	474	rs2803298-T	rs2803298	0	2803298	regulatory_region_variant	1	0.5398	2e-16	15.699		0.0141	[0.011-0.017] unit increase	NR [~ 27400000] (imputed)	N
1	rs2235537	1	1850428	rs2295363	2019-02-06	30595370	Kichaev G	2018-12-27	Am J Hum Genet	www.ncbi.nlm.nih.gov/pubmed/30595370	Leveraging Polygenic Functional Enrichment to Improve GWAS Power.	Body mass index	approximately 458,000 European ancestry individuals	NA	1p36.33		TMEM52			ENSG00000178821	NA	NA	rs2295363-?	rs2295363	0	2295363	3_prime_UTR_variant	0	NR	4e-14	13.3979		NA		NR [~ 8900000] (imputed)	N
1	rs2235537	1	1853184	rs2748985	2020-06-17	32317632	van de Vegte YJ	2020-04-21	Nat Commun	www.ncbi.nlm.nih.gov/pubmed/32317632	Genome-wide association studies and Mendelian randomization analyses for leisure sedentary behaviours.	Leisure sedentary behaviour (computer use)	408,815 European ancestry individuals	NA	1p36.33	NR	TMEM52 - CFAP74	ENSG00000178821	ENSG00000142609		2466	206	rs2748985-?	rs2748985	0	2748985	intergenic_variant	1		4e-12	11.3979		0.0153444	[0.011-0.02] unit decrease	Affymetrix [19400418] (imputed)	N
1	rs2235537	1	1860087	rs2748983	2022-08-04	35710981	Liu H	2022-06-16	Nat Genet	www.ncbi.nlm.nih.gov/pubmed/35710981	Epigenomic and transcriptomic analyses define core cell types, genes and targetable mechanisms for kidney disease.	Estimated glomerular filtration rate (creatinine)	1,205,871 European ancestry individuals, 168,300 East Asian ancestry individuals, 63,553 African ancestry individuals, 23,509 Hispanic or Latin American individuals, 22,103 African American individuals, 21,791 Central Asian or South Asian ancestry individuals, 1,502 Middle Eastern ancestry individuals, 939 other admixed ancestry individuals, 602 Native American ancestry individuals, 150 Asian anc…	NA	1p36.33		CFAP74			ENSG00000142609	NA	NA	rs2748983-T	rs2748983	0	2748983	intron_variant	0	0.5492	3e-10	9.52288		6.278	z score decrease	Affymetrix, Illumina [12653804] (imputed)	N
1	rs2235537	1	1864526	rs3121830	2020-04-17	31669095	Zhu Z	2019-10-24	J Allergy Clin Immunol	www.ncbi.nlm.nih.gov/pubmed/31669095	Shared Genetic and Experimental Links between Obesity-Related Traits and Asthma Subtypes in UK Biobank.	Body mass index	457,822 European ancestry individuals	NA	1p36.33	NR	CFAP74			ENSG00000142609	NA	NA	rs3121830-?	rs3121830	0	3121830	intron_variant	0	NR	3e-14	13.5229		NA		Affymetrix [~ 8270000] (imputed)	N
1	rs2235537	1	1865298	rs2803316	2019-11-04	30239722	Pulit SL	2018-09-14	Hum Mol Genet	www.ncbi.nlm.nih.gov/pubmed/30239722	Meta-analysis of genome-wide association studies for body fat distribution in 694,649 individuals of European ancestry.	Body mass index	374,756 European ancestry male individuals	NA	1p36.33	NA	CFAP74			ENSG00000142609	NA	NA	rs2803316-A	rs2803316	0	2803316	intron_variant	0	0.4551	2e-16	15.699		0.0142	[0.011-0.018] unit decrease	NR [~ 27400000] (imputed)	N
1	rs2235537	1	1865298	rs2803316	2019-11-05	30239722	Pulit SL	2018-09-14	Hum Mol Genet	www.ncbi.nlm.nih.gov/pubmed/30239722	Meta-analysis of genome-wide association studies for body fat distribution in 694,649 individuals of European ancestry.	Body mass index	806,834 European ancestry individuals	NA	1p36.33	NA	CFAP74			ENSG00000142609	NA	NA	rs2803316-A	rs2803316	0	2803316	intron_variant	0	0.4551	2e-16	15.699		0.0142	[0.011-0.018] unit decrease	NR [~ 27400000] (imputed)	N
1	rs2235537	1	1874326	rs2803328	2018-07-24	26426971	Winkler TW	2015-10-01	PLoS Genet	www.ncbi.nlm.nih.gov/pubmed/26426971	The Influence of Age and Sex on Genetic Associations with Adult Body Size and Shape: A Large-Scale Genome-Wide Interaction Study.	Body mass index	up to 309,889 European ancestry individuals	NA	1p36.33	PRKCZ, SKI, RER1, GNB1, CDK11A, C1orf233, VWA1, ATAD3C, MIB2, SLC35E2, CALML6, GABRD, C1orf86, MORN1, ATAD3B, MMP23B, NADK, TMEM52, LOC100129534, ATAD3A, MMP23A, PEX10, TMEM240, CDK11B, SSU72, SLC35E2B	CFAP74			ENSG00000142609	NA	NA	rs2803328-C	rs2803328	0	2803328	intron_variant	0	0.494345	3e-08	7.52288		0.0160342	unit decrease	Affymetrix, Illumina, Perlegen [up to 2800000] (imputed)	N
2	rs78265569	1	2146165	rs78265569	2017-08-30	27863252	Astle WJ	2016-11-17	Cell	www.ncbi.nlm.nih.gov/pubmed/27863252	The Allelic Landscape of Human Blood Cell Trait Variation and Links to Common Complex Disease.	Plateletcrit	164,339 European ancestry individuals	NA	1p36.33	RP11-181G12.4	FAAP20 - SKI	ENSG00000162585	ENSG00000157933		2006	13593	rs78265569-A	rs78265569	0	78265569	intron_variant	1	0.0894	5e-10	9.30103		0.0403757	[0.028-0.053] unit decrease	Affymetrix [~ 2500000] (imputed)	N
2	rs78265569	1	2146165	rs78265569	2017-08-30	27863252	Astle WJ	2016-11-17	Cell	www.ncbi.nlm.nih.gov/pubmed/27863252	The Allelic Landscape of Human Blood Cell Trait Variation and Links to Common Complex Disease.	Platelet count	166,066 European ancestry individuals	NA	1p36.33	RP11-181G12.4	FAAP20 - SKI	ENSG00000162585	ENSG00000157933		2006	13593	rs78265569-A	rs78265569	0	78265569	intron_variant	1	0.0894	2e-12	11.699		0.0457835	[0.033-0.058] unit decrease	Affymetrix [~ 2500000] (imputed)	N
2	rs78265569	1	2146165	rs78265569	2020-09-18	32888494	Vuckovic D	2020-09-01	Cell	www.ncbi.nlm.nih.gov/pubmed/32888494	The Polygenic and Monogenic Basis of Blood Traits and Diseases.	Mean corpuscular hemoglobin concentration	408,112 British individuals	NA	1p36.33	RP11-181G12.4	FAAP20 - SKI	ENSG00000162585	ENSG00000157933		2006	13593	rs78265569-A	rs78265569	0	78265569	intron_variant	1	0.087981	4e-10	9.39794		0.0235024	[0.016-0.031] unit increase	Affymetrix [93095623] (imputed)	N
2	rs78265569	1	2146165	rs78265569	2020-09-21	32888493	Chen MH	2020-09-01	Cell	www.ncbi.nlm.nih.gov/pubmed/32888493	Trans-ethnic and Ancestry-Specific Blood-Cell Genetics in 746,667 Individuals from 5 Global Populations.	Mean corpuscular hemoglobin concentration	491,553 European ancestry individuals	NA	1p36.33	NR	FAAP20 - SKI	ENSG00000162585	ENSG00000157933		2006	13593	rs78265569-A	rs78265569	0	78265569	intron_variant	1	0.087825	2e-10	9.69897		0.022871	[0.016-0.03] SD unit increase	Affymetrix, Illumina [50282193] (imputed)	N
2	rs78265569	1	2146165	rs78265569	2020-09-18	32888494	Vuckovic D	2020-09-01	Cell	www.ncbi.nlm.nih.gov/pubmed/32888494	The Polygenic and Monogenic Basis of Blood Traits and Diseases.	Mean spheric corpuscular volume	408,112 British individuals	NA	1p36.33	RP11-181G12.4	FAAP20 - SKI	ENSG00000162585	ENSG00000157933		2006	13593	rs78265569-A	rs78265569	0	78265569	intron_variant	1	0.087977	2e-13	12.699		0.0288613	[0.021-0.037] unit decrease	Affymetrix [93095623] (imputed)	N
2	rs78265569	1	2147874	rs10910028	2020-09-18	32888494	Vuckovic D	2020-09-01	Cell	www.ncbi.nlm.nih.gov/pubmed/32888494	The Polygenic and Monogenic Basis of Blood Traits and Diseases.	High light scatter reticulocyte count	408,112 British individuals	NA	1p36.33	RP11-181G12.4	FAAP20 - SKI	ENSG00000162585	ENSG00000157933		3715	11884	rs10910028-G	rs10910028	0	10910028	intron_variant	1	0.073735	2e-21	20.699		0.0407704	[0.032-0.049] unit increase	Affymetrix [93095623] (imputed)	N
2	rs78265569	1	2147874	rs10910028	2020-09-18	32888494	Vuckovic D	2020-09-01	Cell	www.ncbi.nlm.nih.gov/pubmed/32888494	The Polygenic and Monogenic Basis of Blood Traits and Diseases.	High light scatter reticulocyte percentage of red cells	408,112 British individuals	NA	1p36.33	RP11-181G12.4	FAAP20 - SKI	ENSG00000162585	ENSG00000157933		3715	11884	rs10910028-G	rs10910028	0	10910028	intron_variant	1	0.073737	2e-19	18.699		0.0386631	[0.03-0.047] unit increase	Affymetrix [93095623] (imputed)	N
2	rs78265569	1	2147874	rs10910028	2020-09-18	32888494	Vuckovic D	2020-09-01	Cell	www.ncbi.nlm.nih.gov/pubmed/32888494	The Polygenic and Monogenic Basis of Blood Traits and Diseases.	Reticulocyte count	408,112 British individuals	NA	1p36.33	RP11-181G12.4	FAAP20 - SKI	ENSG00000162585	ENSG00000157933		3715	11884	rs10910028-G	rs10910028	0	10910028	intron_variant	1	0.073743	1e-26	26		0.0458329	[0.037-0.054] unit increase	Affymetrix [93095623] (imputed)	N
2	rs78265569	1	2147874	rs10910028	2020-09-18	32888494	Vuckovic D	2020-09-01	Cell	www.ncbi.nlm.nih.gov/pubmed/32888494	The Polygenic and Monogenic Basis of Blood Traits and Diseases.	Reticulocyte fraction of red cells	408,112 British individuals	NA	1p36.33	RP11-181G12.4	FAAP20 - SKI	ENSG00000162585	ENSG00000157933		3715	11884	rs10910028-G	rs10910028	0	10910028	intron_variant	1	0.073735	3e-24	23.5229		0.0436687	[0.035-0.052] unit increase	Affymetrix [93095623] (imputed)	N
2	rs78265569	1	2153935	rs188060308	2020-09-21	32888493	Chen MH	2020-09-01	Cell	www.ncbi.nlm.nih.gov/pubmed/32888493	Trans-ethnic and Ancestry-Specific Blood-Cell Genetics in 746,667 Individuals from 5 Global Populations.	Red cell distribution width	531,774 European ancestry individuals	NA	1p36.33	NR	FAAP20 - SKI	ENSG00000162585	ENSG00000157933		9776	5823	rs188060308-C	rs188060308	0	188060308	intergenic_variant	1	0.069858	3e-10	9.52288		0.025094	[0.017-0.033] SD unit decrease	Affymetrix, Illumina [49860007] (imputed)	N
2	rs78265569	1	2160390	rs28384811	2021-12-14	34594039	Sakaue S	2021-09-30	Nat Genet	www.ncbi.nlm.nih.gov/pubmed/34594039	A cross-population atlas of genetic associations for 220 human phenotypes.	Alanine aminotransferase levels	344,136 European ancestry individuals, 150,545 East Asian ancestry individuals	NA	1p36.33		SKI			ENSG00000157933	NA	NA	rs28384811-G	rs28384811	0	28384811	missense_variant	0	NR	2e-14	13.699		0.0327	[0.024-0.041] unit increase	Affymetrix, Illumina [20538387] (imputed)	N
2	rs78265569	1	2166809	rs76875252	2019-02-08	30595370	Kichaev G	2018-12-27	Am J Hum Genet	www.ncbi.nlm.nih.gov/pubmed/30595370	Leveraging Polygenic Functional Enrichment to Improve GWAS Power.	Red cell distribution width	approximately 445,000 European ancestry individuals	NA	1p36.33		SKI			ENSG00000157933	NA	NA	rs76875252-?	rs76875252	0	76875252	intron_variant	0	NR	3e-08	7.52288		NA		NR [~ 8900000] (imputed)	N
2	rs78265569	1	2175553	rs142451335	2021-02-19	33547301	Chen VL	2021-02-05	Nat Commun	www.ncbi.nlm.nih.gov/pubmed/33547301	Genome-wide association study of serum liver enzymes implicates diverse metabolic and liver pathology.	Alanine aminotransferase levels	390,812 European ancestry individuals	134,154 East Asian ancestry individuals	1p36.33	SKI	SKI			ENSG00000157933	NA	NA	rs142451335-T	rs142451335	0	142451335	intron_variant	0	0.072	2e-09	8.69897		5.99	z-score increase	Affymetrix [4312306] (imputed)	N
2	rs78265569	1	2176126	rs11582968	2021-06-09	33972514	Pazoki R	2021-05-10	Nat Commun	www.ncbi.nlm.nih.gov/pubmed/33972514	Genetic analysis in European ancestry individuals identifies 517 loci associated with liver enzymes.	Liver enzyme levels (alanine transaminase)	437,267 European ancestry individuals	315,572 European ancestry individuals	1p36.33	SKI	SKI			ENSG00000157933	NA	NA	rs11582968-T	rs11582968	0	11582968	intron_variant	0	0.927232	2e-15	14.699		0.00598949	[0.0045-0.0075] unit decrease	Affymetrix [13995440] (imputed)	N
2	rs78265569	1	2176561	rs116374150	2021-12-14	34594039	Sakaue S	2021-09-30	Nat Genet	www.ncbi.nlm.nih.gov/pubmed/34594039	A cross-population atlas of genetic associations for 220 human phenotypes.	Gamma glutamyl transpeptidase	344,104 European ancestry individuals, 133,471 East Asian ancestry individuals	NA	1p36.33		SKI			ENSG00000157933	NA	NA	rs116374150-T	rs116374150	0	116374150	intron_variant	0	NR	2e-15	14.699		0.0333	[0.025-0.042] unit increase	Affymetrix, Illumina [20535691] (imputed)	N
2	rs78265569	1	2184638	rs76154380	2019-02-08	30595370	Kichaev G	2018-12-27	Am J Hum Genet	www.ncbi.nlm.nih.gov/pubmed/30595370	Leveraging Polygenic Functional Enrichment to Improve GWAS Power.	Lung function (FVC)	approximately 372,000 European ancestry individuals	NA	1p36.33		SKI			ENSG00000157933	NA	NA	rs76154380-?	rs76154380	0	76154380	intron_variant	0	NR	9e-17	16.0458		NA		NR [~ 8900000] (imputed)	N
3	rs10910019	1	2784616	rs7546616	2020-01-28	31676860	Zhao B	2019-11-01	Nat Genet	www.ncbi.nlm.nih.gov/pubmed/31676860	Genome-wide association analysis of 19,629 individuals identifies variants influencing regional brain volumes and refines their genetic co-architecture with cognitive and mental health traits.	Brain region volumes	19,629 British ancestry individuals	NA	1p36.32	NR	TTC34 - NA	ENSG00000215912			66334	NA	rs7546616-?	rs7546616	0	7546616	regulatory_region_variant	1	NR	6e-09	8.22185	(right precuneus)	NA		NR [9227495] (imputed)	N
3	rs4373707	1	2797856	rs10797342	2020-10-23	32665545	van der Meer D	2020-07-14	Nat Commun	www.ncbi.nlm.nih.gov/pubmed/32665545	Understanding the genetic determinants of the brain with MOSTest.	Brain morphology (MOSTest)	26,502 European ancestry individuals	NA	1p36.32	NR	TTC34 - ACTRT2	ENSG00000215912	ENSG00000169717		79574	140176	rs10797342-?	rs10797342	0	10797342	intergenic_variant	1		3e-14	13.5229		NA		NR [7428630] (imputed)	N
3	rs4373707	1	2797856	rs10797342	2022-03-28	33821002	Naqvi S	2021-04-05	Nat Genet	www.ncbi.nlm.nih.gov/pubmed/33821002	Shared heritability of human face and brain shape.	Brain shape (segment 1)	19,670 European ancestry individuals	NA	1p36.32		TTC34 - ACTRT2	ENSG00000215912	ENSG00000169717		79574	140176	rs10797342-?	rs10797342	0	10797342	intergenic_variant	1	NR	6e-29	28.2218		NA		NR [9705931] (imputed)	N
3	rs4373707	1	2798205	rs2124662	2022-11-23	35164939	van der Meer D	2022-02-11	Biol Psychiatry	www.ncbi.nlm.nih.gov/pubmed/35164939	Boosting Schizophrenia Genetics by Utilizing Genetic Overlap With Brain Morphology.	Brain morphology (MOSTest)	33,735 white British ancestry individuals	NA	1p36.32		TTC34 - ACTRT2	ENSG00000215912	ENSG00000169717		79923	139827	rs2124662-?	rs2124662	0	2124662	intergenic_variant	1	NR	2e-18	17.699		NA		NR [9061072] (imputed)	N
3	rs4373707	1	2798712	rs4373707	2022-08-04	35505052	Fan CC	2022-05-03	Nat Commun	www.ncbi.nlm.nih.gov/pubmed/35505052	Multivariate genome-wide association study on tissue-sensitive diffusion metrics highlights pathways that shape the human brain.	Whole brain restricted isotropic diffusion (multivariate analysis)	23,543 European ancestry individuals	11,555 European ancestry individuals, 3,030 non-European ancestry individuals	1p36.32		TTC34 - ACTRT2	ENSG00000215912	ENSG00000169717		80430	139320	rs4373707-?	rs4373707	0	4373707	intergenic_variant	1	NR	6e-29	28.2218	(EA)	NA		NR [NR] (imputed)	N
3	rs4373707	1	2798712	rs4373707	2022-08-04	35505052	Fan CC	2022-05-03	Nat Commun	www.ncbi.nlm.nih.gov/pubmed/35505052	Multivariate genome-wide association study on tissue-sensitive diffusion metrics highlights pathways that shape the human brain.	Whole brain free water diffusion (multivariate analysis)	23,543 European ancestry individuals	11,555 European ancestry individuals, 3,030 non-European ancestry individuals	1p36.32		TTC34 - ACTRT2	ENSG00000215912	ENSG00000169717		80430	139320	rs4373707-?	rs4373707	0	4373707	intergenic_variant	1	NR	1e-21	21	(EA)	NA		NR [NR] (imputed)	N
3	rs4373707	1	2798712	rs4373707	2021-12-15	34560273	Shadrin AA	2021-09-21	Neuroimage	www.ncbi.nlm.nih.gov/pubmed/34560273	Vertex-wise multivariate genome-wide association study identifies 780 unique genetic loci associated with cortical morphology.	Cortical thickness	35,657 White British ancestry individuals	NA	1p36.32	NR	TTC34 - ACTRT2	ENSG00000215912	ENSG00000169717		80430	139320	rs4373707-T	rs4373707	0	4373707	intergenic_variant	1	0.4675	1e-17	17		NA		NR [9056863] (imputed)	N
3	rs4373707	1	2798712	rs4373707	2022-03-07	34910505	van der Meer D	2021-12-15	Sci Adv	www.ncbi.nlm.nih.gov/pubmed/34910505	The genetic architecture of human cortical folding.	Vertex-wise cortical thickness	33,748 European ancestry individuals	NA	1p36.32		TTC34 - ACTRT2	ENSG00000215912	ENSG00000169717		80430	139320	rs4373707-T	rs4373707	0	4373707	intergenic_variant	1	0.47	2e-22	21.699		9.76	z score increase	Affymetrix [9061022] (imputed)	N
3	rs4373707	1	2798712	rs4373707	2022-03-07	34910505	van der Meer D	2021-12-15	Sci Adv	www.ncbi.nlm.nih.gov/pubmed/34910505	The genetic architecture of human cortical folding.	Vertex-wise cortical surface area	33,748 European ancestry individuals	NA	1p36.32		TTC34 - ACTRT2	ENSG00000215912	ENSG00000169717		80430	139320	rs4373707-T	rs4373707	0	4373707	intergenic_variant	1	0.47	2e-37	36.699		12.78	z score increase	Affymetrix [9061022] (imputed)	N
3	rs4373707	1	2799480	rs11580768	2020-10-23	32665545	van der Meer D	2020-07-14	Nat Commun	www.ncbi.nlm.nih.gov/pubmed/32665545	Understanding the genetic determinants of the brain with MOSTest.	Cortical surface area (MOSTest)	26,502 European ancestry individuals	NA	1p36.32	PRKCZ	TTC34 - NA	ENSG00000215912			81198	NA	rs11580768-?	rs11580768	0	11580768	intergenic_variant	1		1e-14	14		NA		NR [7428630] (imputed)	N
3	rs4373707	1	2799480	rs11580768	2019-02-06	30595370	Kichaev G	2018-12-27	Am J Hum Genet	www.ncbi.nlm.nih.gov/pubmed/30595370	Leveraging Polygenic Functional Enrichment to Improve GWAS Power.	Balding type 1	approximately 208,000 European ancestry individuals	NA	1p36.32		TTC34 - NA	ENSG00000215912			81198	NA	rs11580768-?	rs11580768	0	11580768	intergenic_variant	1	NR	2e-12	11.699		NA		NR [~ 8900000] (imputed)	N
4	rs11122148	1	6846479	rs11122147	2022-03-07	34910505	van der Meer D	2021-12-15	Sci Adv	www.ncbi.nlm.nih.gov/pubmed/34910505	The genetic architecture of human cortical folding.	Vertex-wise sulcal depth	33,748 European ancestry individuals	NA	1p36.31		CAMTA1			ENSG00000171735	NA	NA	rs11122147-G	rs11122147	0	11122147	intron_variant	0	0.13	4e-08	7.39794		5.5	z score increase	Affymetrix [9061022] (imputed)	N
4	rs11122148	1	6848505	rs11122148	2022-07-01	35361970	Okbay A	2022-03-31	Nat Genet	www.ncbi.nlm.nih.gov/pubmed/35361970	Polygenic prediction of educational attainment within and between families from genome-wide association analyses in 3 million individuals.	Educational attainment	3,037,499 European ancestry individuals	NA	1p36.31		CAMTA1			ENSG00000171735	NA	NA	rs11122148-A	rs11122148	0	11122148	intron_variant	0	0.1561	2e-12	11.699		0.0101634	[0.0073-0.013] unit increase	Illumina [10675380] (imputed)	N
4	rs11122148	1	6851124	rs12048319	2022-11-23	35164939	van der Meer D	2022-02-11	Biol Psychiatry	www.ncbi.nlm.nih.gov/pubmed/35164939	Boosting Schizophrenia Genetics by Utilizing Genetic Overlap With Brain Morphology.	Brain morphology (MOSTest)	33,735 white British ancestry individuals	NA	1p36.31		CAMTA1			ENSG00000171735	NA	NA	rs12048319-?	rs12048319	0	12048319	intron_variant	0	NR	4e-08	7.39794		NA		NR [9061072] (imputed)	N
4	rs11122148	1	6853091	rs34394051	2018-10-19	30038396	Lee JJ	2018-07-23	Nat Genet	www.ncbi.nlm.nih.gov/pubmed/30038396	Gene discovery and polygenic prediction from a genome-wide association study of educational attainment in 1.1 million individuals.	Educational attainment (years of education)	up to 1,131,881 European ancestry individuals	NA	1p36.31		CAMTA1			ENSG00000171735	NA	NA	rs34394051-A	rs34394051	0	34394051	intron_variant	0	0.8429	2e-09	8.69897		0.0117	[0.0078-0.0156] unit decrease	Affymetrix, Illumina [10000000] (imputed)	N
4	rs11122148	1	6853091	rs34394051	2018-11-12	30038396	Lee JJ	2018-07-23	Nat Genet	www.ncbi.nlm.nih.gov/pubmed/30038396	Gene discovery and polygenic prediction from a genome-wide association study of educational attainment in 1.1 million individuals.	Educational attainment (MTAG)	1,311,438 European ancestry individuals	NA	1p36.31	Intergenic	CAMTA1			ENSG00000171735	NA	NA	rs34394051-A	rs34394051	0	34394051	intron_variant	0	0.8429	8e-09	8.09691	(MTAG)	0.0105	[0.007-0.014] unit decrease	Affymetrix, Illumina [7100000] (imputed)	N
4	rs11122148	1	6858858	rs11122154	2020-11-04	33097823	Pei YF	2020-10-23	Commun Biol	www.ncbi.nlm.nih.gov/pubmed/33097823	The genetic architecture of appendicular lean mass characterized by association analysis in the UK Biobank study.	Appendicular lean mass	450,243 European ancestry individuals	NA	1p36.31	CAMTA1	CAMTA1			ENSG00000171735	NA	NA	rs11122154-A	rs11122154	0	11122154	intron_variant	0	0.1665	3e-15	14.5229		0.02	[0.015-0.025] unit increase	Affymetrix [18391927] (imputed)	N
4	rs11122148	1	6863773	rs11122155	2018-09-17	29844566	Davies G	2018-05-29	Nat Commun	www.ncbi.nlm.nih.gov/pubmed/29844566	Study of 300,486 individuals identifies 148 independent genetic loci influencing general cognitive function.	Reaction time	330,069 European ancestry individuals	NA	1p36.31	NR	CAMTA1			ENSG00000171735	NA	NA	rs11122155-?	rs11122155	0	11122155	intron_variant	0	NR	4e-07	6.39794		0.0088635	[0.0054-0.0123] unit decrease	Affymetrix [805426] (imputed)	N
4	rs11122148	1	6864187	rs11122156	2022-03-07	34910505	van der Meer D	2021-12-15	Sci Adv	www.ncbi.nlm.nih.gov/pubmed/34910505	The genetic architecture of human cortical folding.	Vertex-wise cortical thickness	33,748 European ancestry individuals	NA	1p36.31		CAMTA1			ENSG00000171735	NA	NA	rs11122156-C	rs11122156	0	11122156	intron_variant	0	0.17	6e-09	8.22185		5.81	z score increase	Affymetrix [9061022] (imputed)	N
4	rs182166	1	6866978	rs660880	2022-08-30	32193382	Cole JB	2020-03-19	Nat Commun	www.ncbi.nlm.nih.gov/pubmed/32193382	Comprehensive genomic analysis of dietary habits in UK Biobank identifies hundreds of genetic associations.	Principal component-derived dietary pattern 3	449,210 European ancestry individuals	NA	1p36.31		CAMTA1			ENSG00000171735	NA	NA	rs660880-G	rs660880	0	660880	intron_variant	0	0.486317	6e-12	11.2218		0.0260736	[0.019-0.033] unit increase	NR [NR] (imputed)	N
4	rs11122148	1	6867842	rs12735232	2019-02-06	30595370	Kichaev G	2018-12-27	Am J Hum Genet	www.ncbi.nlm.nih.gov/pubmed/30595370	Leveraging Polygenic Functional Enrichment to Improve GWAS Power.	Educational attainment (years of education)	approximately 455,000 European ancestry individuals	NA	1p36.31		CAMTA1			ENSG00000171735	NA	NA	rs12735232-?	rs12735232	0	12735232	intron_variant	0	NR	7e-10	9.1549		NA		NR [~ 8900000] (imputed)	N
4	rs11122148	1	6867842	rs12735232	2022-04-05	34855049	Pasman JA	2021-12-02	Behav Genet	www.ncbi.nlm.nih.gov/pubmed/34855049	Genetic Risk for Smoking: Disentangling Interplay Between Genes and Socioeconomic Status.	Educational attainment	451,800 European or unknown ancestry individuals	NA	1p36.31		CAMTA1			ENSG00000171735	NA	NA	rs12735232-?	rs12735232	0	12735232	intron_variant	0	NR	1e-11	11		NA		NR [1300000]	N
5	rs301817	1	8431607	rs3795310	2018-10-31	29942085	Nagel M	2018-06-25	Nat Genet	www.ncbi.nlm.nih.gov/pubmed/29942085	Meta-analysis of genome-wide association studies for neuroticism in 449,484 individuals identifies novel genetic loci and pathways.	Depressed affect	357,957 European ancestry individuals	NA	1p36.23	NR	RERE			ENSG00000142599	NA	NA	rs3795310-T	rs3795310	0	3795310	intron_variant	0	NR	3e-09	8.52288		0.01376	[0.0092-0.0183] unit increase	Affymetrix [10847151] (imputed)	N
5	rs301817	1	8431607	rs3795310	2019-01-22	29500382	Nagel M	2018-03-02	Nat Commun	www.ncbi.nlm.nih.gov/pubmed/29500382	Item-level analyses reveal genetic heterogeneity in neuroticism.	Feeling miserable	376,097 European ancestry individuals	NA	1p36.23	RERE	RERE			ENSG00000142599	NA	NA	rs3795310-T	rs3795310	0	3795310	intron_variant	0	0.459361	1e-09	9		6.11	z score increase	NR [10847151] (imputed)	N
5	rs301817	1	8431607	rs3795310	2021-02-08	33536424	Wang YF	2021-02-03	Nat Commun	www.ncbi.nlm.nih.gov/pubmed/33536424	Identification of 38 novel loci for systemic lupus erythematosus and genetic heterogeneity between ancestral groups.	Systemic lupus erythematosus	4,222 Han Chinese ancestry cases, 8,431 Han Chinese ancestry controls, 4,576 European ancestry cases, 8,039 European ancestry controls	NA	1p36.23	RERE	RERE			ENSG00000142599	NA	NA	rs3795310-T	rs3795310	0	3795310	intron_variant	0	NR	3e-08	7.52288		0.88	[0.83-0.93]	Illumina [NR] (imputed)	N
5	rs301817	1	8431607	rs3795310	2021-02-08	33536424	Wang YF	2021-02-03	Nat Commun	www.ncbi.nlm.nih.gov/pubmed/33536424	Identification of 38 novel loci for systemic lupus erythematosus and genetic heterogeneity between ancestral groups.	Systemic lupus erythematosus	4,576 European ancestry cases, 8,039 European ancestry controls	NA	1p36.23	RERE	RERE			ENSG00000142599	NA	NA	rs3795310-T	rs3795310	0	3795310	intron_variant	0	NR	8e-06	5.09691		0.882	[0.83-0.94]	NR [NR] (imputed)	N
5	rs301817	1	8431607	rs3795310	2022-03-07	34910505	van der Meer D	2021-12-15	Sci Adv	www.ncbi.nlm.nih.gov/pubmed/34910505	The genetic architecture of human cortical folding.	Vertex-wise sulcal depth	33,748 European ancestry individuals	NA	1p36.23		RERE			ENSG00000142599	NA	NA	rs3795310-T	rs3795310	0	3795310	intron_variant	0	0.5	5e-13	12.301		7.22	z score increase	Affymetrix [9061022] (imputed)	N
5	rs301817	1	8476428	rs159960	2019-03-07	30578418	Giri A	2018-12-21	Nat Genet	www.ncbi.nlm.nih.gov/pubmed/30578418	Trans-ethnic association study of blood pressure determinants in over 750,000 individuals.	Systolic blood pressure	365,998 European ancestry individuals, 63,490 African ancestry individuals, 22,802 Hispanic individuals, 4,792 Asian ancestry individuals, 2,695 Native American ancestry individuals	299,024 European ancestry individuals, 17,277 individuals	1p36.23	RERE	RERE			ENSG00000142599	NA	NA	rs159960-G	rs159960	0	159960	intron_variant	0	0.4883	3e-12	11.5229		0.2382	[0.17-0.31] mmHg decrease	Affymetrix [NR] (imputed)	N
5	rs301817	1	8476428	rs159960	2020-01-21	31518406	Abdellaoui A	2019-09-13	Hum Mol Genet	www.ncbi.nlm.nih.gov/pubmed/31518406	Phenome-wide investigation of health outcomes associated with genetic predisposition to loneliness.	Loneliness	511,280 European ancestry individuals	NA	1p36.23	RERE	RERE			ENSG00000142599	NA	NA	rs159960-?	rs159960	0	159960	intron_variant	0	NR	5e-08	7.30103		0.02	[0.014-0.026] unit increase	Affymetrix, Illumina [up to 14113458] (imputed)	N
5	rs301817	1	8476428	rs159960	2020-03-02	31361310	Johansson A	2019-07-30	Hum Mol Genet	www.ncbi.nlm.nih.gov/pubmed/31361310	Genome-wide association analysis of 350‚Äâ000 Caucasians from the UK Biobank identifies novel loci for asthma, hay fever and eczema.	Asthma	41,926 European ancestry cases, 239,773 European ancestry controls	10,365 cases, 16,100 controls	1p36.23	RERE	RERE			ENSG00000142599	NA	NA	rs159960-A	rs159960	0	159960	intron_variant	0	0.4389	4e-10	9.39794		NA		Affymetrix [15688218] (imputed)	N
5	rs301817	1	8476428	rs159960	2019-06-21	31015401	Wu Y	2019-04-23	Nat Commun	www.ncbi.nlm.nih.gov/pubmed/31015401	Genome-wide association study of medication-use and associated disease in the UK Biobank.	Medication use (adrenergics, inhalants)	28,880 European ancestry cases, 147,565 European ancestry controls	NA	1p36.23	RERE	RERE			ENSG00000142599	NA	NA	rs159960-A	rs159960	0	159960	intron_variant	0	0.440566	4e-10	9.39794		0.0570918	[0.039-0.075] unit decrease	Affymetrix [7288503] (imputed)	N
5	rs301817	1	8476428	rs159960	2022-05-13	35104449	John C	2022-01-29	Chest	www.ncbi.nlm.nih.gov/pubmed/35104449	Genetic associations and architecture of asthma-chronic obstructive pulmonary disease overlap.	Asthma-COPD overlap syndrome	8,068 European ancestry cases, 40,360 European ancestry controls	4,301 European ancestry cases, 48,609 European ancestry controls, 297 African American cases, 1,335 African American controls	1p36.23		RERE			ENSG00000142599	NA	NA	rs159960-G	rs159960	0	159960	intron_variant	0	0.559	7e-09	8.1549	(EA)	1.093	[1.06-1.126]	Affymetrix [7693381] (imputed)	N
5	rs301817	1	8476428	rs159960	2021-12-14	34594039	Sakaue S	2021-09-30	Nat Genet	www.ncbi.nlm.nih.gov/pubmed/34594039	A cross-population atlas of genetic associations for 220 human phenotypes.	Medication use (adrenergics, inhalants)	28,880 European ancestry cases, 147,565 European ancestry controls, 5,880 East Asian ancestry cases, 172,846 East Asian ancestry controls	NA	1p36.23		RERE			ENSG00000142599	NA	NA	rs159960-G	rs159960	0	159960	intron_variant	0	NR	2e-09	8.69897		0.052	[0.035-0.069] unit increase	Affymetrix, Illumina [15248280] (imputed)	N
5	rs301817	1	8481016	rs301805	2019-03-18	30643258	Karlsson Linner R	2019-01-14	Nat Genet	www.ncbi.nlm.nih.gov/pubmed/30643258	Genome-wide association analyses of risk tolerance and risky behaviors in over 1 million individuals identify hundreds of loci and shared genetic influences.	Smoking status (ever vs never smokers)	518,633 European ancestry individuals	NA	1p36.23	RERE	RERE			ENSG00000142599	NA	NA	rs301805-T	rs301805	0	301805	intron_variant	0	0.4227	4e-08	7.39794		0.0111733	[0.0072-0.0152] unit decrease	Affymetrix [11514654] (imputed)	N
5	rs301817	1	8481016	rs301805	2021-05-19	33082346	Xu K	2020-10-20	Nat Commun	www.ncbi.nlm.nih.gov/pubmed/33082346	Genome-wide association study of smoking trajectory and meta-analysis of smoking status in 842,000 individuals.	Smoking initiation	842,717 European ancestry individuals	NA	1p36.23	RERE	RERE			ENSG00000142599	NA	NA	rs301805-T	rs301805	0	301805	intron_variant	0		3e-09	8.52288		0.979	[NR]	Affymetrix [up to 79000000] (imputed)	N
5	rs301817	1	8481016	rs301805	2019-04-12	29785011	Zhu Z	2018-05-21	Nat Genet	www.ncbi.nlm.nih.gov/pubmed/29785011	A genome-wide cross-trait analysis from UK Biobank highlights the shared genetic architecture of asthma and allergic diseases.	Asthma or allergic disease (pleiotropy)	14,085 European asthma cases, 25,685 European ancestry allergic diseases cases, 76,768 European ancestry controls	NA	1p36.23	RERE	RERE			ENSG00000142599	NA	NA	rs301805-?	rs301805	0	301805	intron_variant	0	NR	6e-09	8.22185		1.04167		NR [74888535] (imputed)	N
5	rs301817	1	8481016	rs301805	2019-02-08	30595370	Kichaev G	2018-12-27	Am J Hum Genet	www.ncbi.nlm.nih.gov/pubmed/30595370	Leveraging Polygenic Functional Enrichment to Improve GWAS Power.	Smoking status	approximately 458,000 European ancestry individuals	NA	1p36.23		RERE			ENSG00000142599	NA	NA	rs301805-?	rs301805	0	301805	intron_variant	0	NR	8e-09	8.09691		NA		NR [~ 8900000] (imputed)	N
5	rs301817	1	8482078	rs301806	2017-12-05	29083406	Ferreira MA	2017-10-30	Nat Genet	www.ncbi.nlm.nih.gov/pubmed/29083406	Shared genetic origin of asthma, hay fever and eczema elucidates allergic disease biology.	Allergic disease (asthma, hay fever or eczema)	180,129 European ancestry cases, 180,709 European ancestry controls	NA	1p36.23	RERE	RERE			ENSG00000142599	NA	NA	rs301806-T	rs301806	0	301806	intron_variant	0	0.54	2e-20	19.699		1.048	[1.04-1.06]	Affymetrix, Illumina [8307659] (imputed)	N
5	rs301817	1	8482078	rs301806	2018-02-27	29292387	Turley P	2018-01-01	Nat Genet	www.ncbi.nlm.nih.gov/pubmed/29292387	Multi-trait analysis of genome-wide association summary statistics using MTAG.	Depressive symptoms (MTAG)	354,862 European ancestry individuals	NA	1p36.23	NR	RERE			ENSG00000142599	NA	NA	rs301806-C	rs301806	0	301806	intron_variant	0	0.4406	1e-09	9		0.0131	[0.009-0.0172] unit increase	Illumina [NR] (imputed)	N
5	rs301817	1	8482078	rs301806	2020-03-02	31361310	Johansson A	2019-07-30	Hum Mol Genet	www.ncbi.nlm.nih.gov/pubmed/31361310	Genome-wide association analysis of 350‚Äâ000 Caucasians from the UK Biobank identifies novel loci for asthma, hay fever and eczema.	Hay fever and/or eczema	84,034 European ancestry cases, 239,773 European ancestry controls	NA	1p36.23	NR	RERE			ENSG00000142599	NA	NA	rs301806-T	rs301806	0	301806	intron_variant	0	0.5842	1e-12	12		1.04395	[1.03-1.06]	Affymetrix [15688218] (imputed)	N
5	rs301817	1	8482078	rs301806	2019-06-25	30804565	Jansen PR	2019-02-25	Nat Genet	www.ncbi.nlm.nih.gov/pubmed/30804565	Genome-wide analysis of insomnia in 1,331,010 individuals identifies new risk loci and functional pathways.	Ease of getting up in the morning	385,949 European ancestry individuals	NA	1p36.23	NR	RERE			ENSG00000142599	NA	NA	rs301806-C	rs301806	0	301806	intron_variant	0	0.4208	5e-08	7.30103		0.0095	[0.0062-0.0128] unit decrease	Affymetrix, Illumina [10862568] (imputed)	N
5	rs301817	1	8482078	rs301806	2020-05-29	32231276	Cai N	2020-03-30	Nat Genet	www.ncbi.nlm.nih.gov/pubmed/32231276	Minimal phenotyping yields genome-wide association signals of low specificity for major depression.	Neuroticism	274,107 British ancestry individuals	NA	1p36.23	NR	RERE			ENSG00000142599	NA	NA	rs301806-C	rs301806	0	301806	intron_variant	0	NR	4e-06	5.39794		1.009	[1.005-1.013]	NR [8968716] (imputed)	N
5	rs301817	1	8482078	rs301806	2019-11-04	30239722	Pulit SL	2018-09-14	Hum Mol Genet	www.ncbi.nlm.nih.gov/pubmed/30239722	Meta-analysis of genome-wide association studies for body fat distribution in 694,649 individuals of European ancestry.	Waist-hip ratio	316,772 European ancestry male individuals	NA	1p36.23	NR	RERE			ENSG00000142599	NA	NA	rs301806-T	rs301806	0	301806	intron_variant	0	0.5925	1e-06	6		0.0087	[0.0052-0.0122] unit increase	NR [~ 27400000] (imputed)	N
5	rs301817	1	8482078	rs301806	2019-03-18	30643256	Baselmans BML	2019-01-14	Nat Genet	www.ncbi.nlm.nih.gov/pubmed/30643256	Multivariate genome-wide analyses of the well-being spectrum.	Well-being spectrum (multivariate analysis)	2,083,151 European ancestry individuals	287,239 European ancestry individuals	1p36.23	NR	RERE			ENSG00000142599	NA	NA	rs301806-T	rs301806	0	301806	intron_variant	0	0.565851	2e-12	11.699		0.00649771	[0.0047-0.0083] unit decrease	NR [NR]	N
5	rs301817	1	8482078	rs301806	2018-08-03	27479909	Hyde CL	2016-08-01	Nat Genet	www.ncbi.nlm.nih.gov/pubmed/27479909	Identification of 15 genetic loci associated with risk of major depression in individuals of European descent.	Major depressive disorder	84,847 European ancestry cases, 241,266 European ancestry controls	45,773 European ancestry cases, 106,354 European ancestry controls	1p36.23	RERE	RERE			ENSG00000142599	NA	NA	rs301806-T	rs301806	0	301806	intron_variant	0	0.551911	2e-09	8.69897		0.0271	[0.015-0.039] unit decrease	Illumina [1220000] (imputed)	N
5	rs301817	1	8482078	rs301806	2019-02-08	30595370	Kichaev G	2018-12-27	Am J Hum Genet	www.ncbi.nlm.nih.gov/pubmed/30595370	Leveraging Polygenic Functional Enrichment to Improve GWAS Power.	Eczema	approximately 459,000 European ancestry individuals	NA	1p36.23		RERE			ENSG00000142599	NA	NA	rs301806-?	rs301806	0	301806	intron_variant	0	NR	1e-16	16		NA		NR [~ 8900000] (imputed)	N
5	rs301817	1	8484823	rs301807	2017-08-30	27863252	Astle WJ	2016-11-17	Cell	www.ncbi.nlm.nih.gov/pubmed/27863252	The Allelic Landscape of Human Blood Cell Trait Variation and Links to Common Complex Disease.	Sum eosinophil basophil counts	171,771 European ancestry individuals	NA	1p36.23	RERE, RP5-1115A15.1	RERE, RERE-AS1			ENSG00000142599, ENSG00000232912	NA	NA	rs301807-G	rs301807	0	301807	intron_variant	0	0.5821	3e-11	10.5229		0.0239347	[0.017-0.031] unit increase	Affymetrix [~ 2500000] (imputed)	N
5	rs301817	1	8484823	rs301807	2018-10-31	29942085	Nagel M	2018-06-25	Nat Genet	www.ncbi.nlm.nih.gov/pubmed/29942085	Meta-analysis of genome-wide association studies for neuroticism in 449,484 individuals identifies novel genetic loci and pathways.	Depression	688,809 European ancestry individuals	NA	1p36.23	NR	RERE, RERE-AS1			ENSG00000142599, ENSG00000232912	NA	NA	rs301807-A	rs301807	0	301807	intron_variant	0	NR	1e-10	10		6.407	z score increase	Affymetrix [10847151] (imputed)	N
5	rs301817	1	8484823	rs301807	2020-10-07	32606422	Wu Y	2020-06-30	Transl Psychiatry	www.ncbi.nlm.nih.gov/pubmed/32606422	Multi-trait analysis for genome-wide association study of five psychiatric disorders.	Depressive symptoms	688,809 individuals	NA	1p36.23	NR	RERE, RERE-AS1			ENSG00000142599, ENSG00000232912	NA	NA	rs301807-?	rs301807	0	301807	intron_variant	0		1e-10	10		NA		NR [11140414]	N
5	rs301817	1	8484823	rs301807	2017-09-26	27723757	Jin Y	2016-11-01	Nat Genet	www.ncbi.nlm.nih.gov/pubmed/27723757	Genome-wide association studies of autoimmune vitiligo identify 23 new risk loci and highlight key pathways and regulatory variants.	Vitiligo	2,853 European ancestry cases and 37,405 European ancestry controls	1,827 European ancestry cases and 2,181 European ancestry controls	1p36.23	RERE	RERE, RERE-AS1			ENSG00000142599, ENSG00000232912	NA	NA	rs301807-A	rs301807	0	301807	intron_variant	0	0.4473	4e-15	14.3979		1.209	[1.15-1.27]	Illumina [8966411] (imputed)	N
5	rs301817	1	8484823	rs301807	2019-03-28	30643251	Liu M	2019-01-14	Nat Genet	www.ncbi.nlm.nih.gov/pubmed/30643251	Association studies of up to 1.2 million individuals yield new insights into the genetic etiology of tobacco and alcohol use.	Smoking initiation (ever regular vs never regular) (MTAG)	up to 1,359,002 European ancestry individuals	NA	1p36.23	NR	RERE, RERE-AS1			ENSG00000142599, ENSG00000232912	NA	NA	rs301807-G	rs301807	0	301807	intron_variant	0	0.57	4e-14	13.3979		0.00822505	[0.0061-0.0104] unit increase	NR [9732723] (imputed)	N
5	rs301817	1	8484823	rs301807	2019-03-28	30643251	Liu M	2019-01-14	Nat Genet	www.ncbi.nlm.nih.gov/pubmed/30643251	Association studies of up to 1.2 million individuals yield new insights into the genetic etiology of tobacco and alcohol use.	Smoking initiation (ever regular vs never regular)	up to 1,232,091 European ancestry individuals	NA	1p36.23	NR	RERE, RERE-AS1			ENSG00000142599, ENSG00000232912	NA	NA	rs301807-G	rs301807	0	301807	intron_variant	0	0.57	3e-12	11.5229		0.0180144	[0.013-0.023] unit increase	NR [~ 10000000] (imputed)	N
5	rs301817	1	8484823	rs301807	2022-09-13	35935937	Hoglund J	2022-07-22	Front Immunol	www.ncbi.nlm.nih.gov/pubmed/35935937	Gene-Based Variant Analysis of Whole-Exome Sequencing in Relation to Eosinophil Count.	Eosinophil counts	365,954 British ancestry individuals	NA	1p36.23		RERE, RERE-AS1			ENSG00000142599, ENSG00000232912	NA	NA	rs301807-A	rs301807	0	301807	intron_variant	0	0.418	6e-11	10.2218		0.024	[0.016-0.032] unit decrease	Affymetrix [6661079] (imputed)	N
5	rs301817	1	8484823	rs301807	2021-12-14	34594039	Sakaue S	2021-09-30	Nat Genet	www.ncbi.nlm.nih.gov/pubmed/34594039	A cross-population atlas of genetic associations for 220 human phenotypes.	Diastolic blood pressure	340,162 European ancestry individuals, 145,515 East Asian ancestry individuals	NA	1p36.23		RERE, RERE-AS1			ENSG00000142599, ENSG00000232912	NA	NA	rs301807-G	rs301807	0	301807	intron_variant	0	NR	1e-12	12		0.0152	[0.011-0.019] unit increase	Affymetrix, Illumina [20537302] (imputed)	N
5	rs301817	1	8489302	rs301799	2014-10-22	24586183	Medici M	2014-02-27	PLoS Genet	www.ncbi.nlm.nih.gov/pubmed/24586183	Identification of novel genetic Loci associated with thyroid peroxidase antibodies and clinical thyroid disease.	Thyroid peroxidase antibody positivity	1,769 European ancestry cases, 16,528 European ancestry controls	922 European ancestry cases, 8,068 European ancestry controls	1p36.23	NR	RERE, RERE-AS1			ENSG00000142599, ENSG00000232912	NA	NA	rs301799-C	rs301799	0	301799	intron_variant	0		3e-06	5.52288		1.11	[1.06-1.17]	Affymetrix, Illumina [up to 3437411] (imputed)	N
5	rs301817	1	8489302	rs301799	2020-08-17	31926635	Coleman JRI	2019-11-01	Biol Psychiatry	www.ncbi.nlm.nih.gov/pubmed/31926635	The Genetics of the Mood Disorder Spectrum: Genome-wide Association Analyses of More Than 185,000 Cases and 439,000 Controls.	Bipolar disorder or major depressive disorder	164,933 European ancestry major depressive disorder cases, 20,352 European ancestry bipolar disorder cases, 439,741 European ancestry controls	NA	1p36.23	NR	RERE, RERE-AS1			ENSG00000142599, ENSG00000232912	NA	NA	rs301799-?	rs301799	0	301799	intron_variant	0	NR	1e-06	6		NA		NR [NR] (imputed)	N
5	rs301817	1	8489302	rs301799	2019-03-19	30718901	Howard DM	2019-02-04	Nat Neurosci	www.ncbi.nlm.nih.gov/pubmed/30718901	Genome-wide meta-analysis of depression identifies 102 independent variants and highlights the importance of the prefrontal brain regions.	Depression	118,811 European ancestry cases, 327,427 European ancestry controls, 127,552 cases, 233,763 controls	414,055 European ancestry cases, 892,299 European ancestry controls	1p36.23	NR	RERE, RERE-AS1			ENSG00000142599, ENSG00000232912	NA	NA	rs301799-C	rs301799	0	301799	intron_variant	0	0.4306	4e-31	30.3979		1.02564	[1.02-1.03]	NR [8098588] (imputed)	N
5	rs301817	1	8489302	rs301799	2020-02-11	31835028	Cross-Disorder Group of the Psychiatric Genomics Consortium	2019-12-01	Cell	www.ncbi.nlm.nih.gov/pubmed/31835028	Genomic Relationships, Novel Loci, and Pleiotropic Mechanisms across Eight Psychiatric Disorders.	Anorexia nervosa, attention-deficit/hyperactivity disorder, autism spectrum disorder, bipolar disorder, major depression, obsessive-compulsive disorder, schizophrenia, or Tourette syndrome (pleiotropy)	19,009 European ancestry ADHD cases, 3,495 European ancestry anorexia cases, 18,381 European ancestry autism cases, 20,352 European ancestry bipolar disorder cases, 130,664 European ancestry major depression cases, 2,688 European ancestry OCD cases, 33,640 European ancestry schizophrenia cases, 4,645 European ancestry Tourette's cases, 494,162 European ancestry controls	NA	1p36.23	RERE, SLC45A1	RERE, RERE-AS1			ENSG00000142599, ENSG00000232912	NA	NA	rs301799-?	rs301799	0	301799	intron_variant	0		2e-08	7.69897		NA		NR [6786993] (imputed)	N
5	rs301817	1	8489302	rs301799	2022-11-18	34924174	Mitchell BL	2021-11-02	Biol Psychiatry	www.ncbi.nlm.nih.gov/pubmed/34924174	The Australian Genetics of Depression Study: New Risk Loci and Dissecting Heterogeneity Between Subtypes.	Depression	13,318 European ancestry cases, 12,684 European ancestry controls, 246,363 cases, 561,190 controls	NA	1p36.23		RERE, RERE-AS1			ENSG00000142599, ENSG00000232912	NA	NA	rs301799-?	rs301799	0	301799	intron_variant	0	NR	4e-14	13.3979		0.0021	unit decrease	Illumina [7617771] (imputed)	N
5	rs301817	1	8489302	rs301799	2022-02-03	35043453	Qi G	2022-01-18	Genet Epidemiol	www.ncbi.nlm.nih.gov/pubmed/35043453	Genome-wide association studies of 27 accelerometry-derived physical activity measurements identified novel loci and genetic mechanisms.	Physical activity (Total log acceleration 6pm-8pm)	88,411 European ancestry individuals	NA	1p36.23		RERE, RERE-AS1			ENSG00000142599, ENSG00000232912	NA	NA	rs301799-C	rs301799	0	301799	intron_variant	0	0.422	2e-09	8.69897		0.027	unit increase	Affymetrix [8951705] (imputed)	N
5	rs301817	1	8497307	rs301802	2020-09-16	32581359	Saevarsdottir S	2020-06-24	Nature	www.ncbi.nlm.nih.gov/pubmed/32581359	FLT3 stop mutation increases FLT3 ligand level and risk of autoimmune thyroid disease.	Autoimmune thyroid disease	30,234 European ancestry cases, 724,172 European ancestry controls	NA	1p36.23	RERE	RERE			ENSG00000142599	NA	NA	rs301802-T	rs301802	0	301802	3_prime_UTR_variant	0	0.417	7e-12	11.1549		1.06	[NR]	Affymetrix, Illumina [42900000] (imputed)	N
5	rs301817	1	8497307	rs301802	2020-10-07	32606422	Wu Y	2020-06-30	Transl Psychiatry	www.ncbi.nlm.nih.gov/pubmed/32606422	Multi-trait analysis for genome-wide association study of five psychiatric disorders.	Depressive symptoms (MTAG)	955,012 individuals	NA	1p36.23	NR	RERE			ENSG00000142599	NA	NA	rs301802-?	rs301802	0	301802	3_prime_UTR_variant	0		3e-10	9.52288		NA		NR [520857]	N
5	rs301817	1	8497307	rs301802	2022-10-25	34586374	Giannakopoulou O	2021-09-29	JAMA Psychiatry	www.ncbi.nlm.nih.gov/pubmed/34586374	The Genetic Architecture of Depression in Individuals of East Asian Ancestry: A Genome-Wide Association Study.	Depression	15,771 East Asian ancestry cases, 178,777 East Asian ancestry controls, 170,756 European ancestry cases, 329,443 European ancestry controls	NA	1p36.23		RERE			ENSG00000142599	NA	NA	rs301802-A	rs301802	0	301802	3_prime_UTR_variant	0	0.6515	1e-08	8		0.0084763	[0.0056-0.0114] unit decrease	Affymetrix, Illumina [NR] (imputed)	N
5	rs301817	1	8501786	rs301819	2019-10-25	31619474	Zhu Z	2019-10-17	Eur Respir J	www.ncbi.nlm.nih.gov/pubmed/31619474	Shared Genetics of Asthma and Mental Health Disorders: A Large-Scale Genome-Wide Cross-Trait Analysis.	Asthma	46,802 European ancestry cases, 347,481 European ancestry controls	23,948 European and unknown ancestry cases, 118,538 European and unknown ancestry controls	1p36.23	RERE	RERE			ENSG00000142599	NA	NA	rs301819-G	rs301819	0	301819	intron_variant	0	0.591567	1e-09	9		1.03919	[1.03-1.05]	Affymetrix [8274727] (imputed)	N
5	rs301817	1	8501786	rs301819	2020-06-04	32296059	Han Y	2020-04-15	Nat Commun	www.ncbi.nlm.nih.gov/pubmed/32296059	Genome-wide analysis highlights contribution of immune system pathways to the genetic architecture of asthma.	Asthma	84,492 European ancestry cases, 2,149 African American cases, 606 Hispanic cases, 1,239 Japanese ancestry cases, 437,036 European ancestry controls, 6,055 African American controls, 792 Hispanic controls, 3,976 Japanese ancestry controls	NR	1p36.23	RERE	RERE			ENSG00000142599	NA	NA	rs301819-G	rs301819	0	301819	intron_variant	0	0.59	2e-15	14.699		NA		NR [> 9500000] (imputed)	N
5	rs301817	1	8501786	rs301819	2019-04-18	30940143	Zhu Z	2019-04-02	Respir Res	www.ncbi.nlm.nih.gov/pubmed/30940143	Genetic overlap of chronic obstructive pulmonary disease and cardiovascular disease-related traits: a large-scale genome-wide cross-trait analysis.	Chronic obstructive pulmonary disease or high blood pressure (pleiotropy)	12,550 European and unknown ancestry chronic obstructive pulmonary disease cases, 46,368 European and unknown ancestry controls, 144,793 European ancestry high blood pressure cases, 313,761 European ancestry controls	NA	1p36.23	RERE	RERE			ENSG00000142599	NA	NA	rs301819-?	rs301819	0	301819	intron_variant	0	NR	1e-11	11		NA		Affymetrix [up to 7325140] (imputed)	N
5	rs301817	1	8501786	rs301819	2019-01-18	30552067	Shrine N	2018-12-11	Lancet Respir Med	www.ncbi.nlm.nih.gov/pubmed/30552067	Moderate-to-severe asthma in individuals of European ancestry: a genome-wide association study.	Asthma (moderate or severe)	5,135 European ancestry cases, 25,675 European ancestry controls	5,414 European ancestry cases, 21,471 European ancestry controls	1p36.23	RERE	RERE			ENSG00000142599	NA	NA	rs301819-G	rs301819	0	301819	intron_variant	0	0.591	3e-07	6.52288		1.08	[1.05-1.12]	Affymetrix [33771858] (imputed)	N
5	rs301817	1	8503379	rs301817	2019-10-25	31619474	Zhu Z	2019-10-17	Eur Respir J	www.ncbi.nlm.nih.gov/pubmed/31619474	Shared Genetics of Asthma and Mental Health Disorders: A Large-Scale Genome-Wide Cross-Trait Analysis.	Asthma and major depressive disorder	46,802 European ancestry asthma cases, 59,851 European ancestry major depressive disorder cases, 460,635 European ancestry controls	NA	1p36.23	RERE	RERE			ENSG00000142599	NA	NA	rs301817-?	rs301817	0	301817	intron_variant	0	NR	3e-09	8.52288		NA		Affymetrix [up to 13554551] (imputed)	N
5	rs301817	1	8503379	rs301817	2020-04-17	31669095	Zhu Z	2019-10-24	J Allergy Clin Immunol	www.ncbi.nlm.nih.gov/pubmed/31669095	Shared Genetic and Experimental Links between Obesity-Related Traits and Asthma Subtypes in UK Biobank.	Nonatopic asthma	28,862 European ancestry cases, 422,048 European ancestry controls	NA	1p36.23	NR	RERE			ENSG00000142599	NA	NA	rs301817-?	rs301817	0	301817	intron_variant	0	NR	5e-08	7.30103		NA		Affymetrix [~ 8270000] (imputed)	N
5	rs301817	1	8503379	rs301817	2020-09-18	32888494	Vuckovic D	2020-09-01	Cell	www.ncbi.nlm.nih.gov/pubmed/32888494	The Polygenic and Monogenic Basis of Blood Traits and Diseases.	Lymphocyte count	408,112 British individuals	NA	1p36.23	RERE	RERE			ENSG00000142599	NA	NA	rs301817-A	rs301817	0	301817	intron_variant	0	0.587814	3e-17	16.5229		0.0189931	[0.015-0.023] unit decrease	Affymetrix [93095623] (imputed)	N
5	rs301817	1	8503379	rs301817	2021-04-15	33568662	Dashti HS	2021-02-10	Nat Commun	www.ncbi.nlm.nih.gov/pubmed/33568662	Genetic determinants of daytime napping and effects on cardiometabolic health.	Daytime nap	452,633 European ancestry individuals	541,333 European ancestry individuals	1p36.23	RERE	RERE			ENSG00000142599	NA	NA	rs301817-A	rs301817	0	301817	intron_variant	0		6e-13	12.2218		0.0062	[0.0044-0.008] unit increase	Affymetrix [13304133] (imputed)	N
5	rs301817	1	8503379	rs301817	2020-09-18	32888494	Vuckovic D	2020-09-01	Cell	www.ncbi.nlm.nih.gov/pubmed/32888494	The Polygenic and Monogenic Basis of Blood Traits and Diseases.	Neutrophil count	408,112 British individuals	NA	1p36.23	RERE	RERE			ENSG00000142599	NA	NA	rs301817-A	rs301817	0	301817	intron_variant	0	0.587858	5e-10	9.30103		0.0139609	[0.0096-0.0184] unit decrease	Affymetrix [93095623] (imputed)	N
5	rs301817	1	8504421	rs159963	2017-08-30	27863252	Astle WJ	2016-11-17	Cell	www.ncbi.nlm.nih.gov/pubmed/27863252	The Allelic Landscape of Human Blood Cell Trait Variation and Links to Common Complex Disease.	Eosinophil percentage of granulocytes	170,536 European ancestry individuals	NA	1p36.23	RERE	RERE			ENSG00000142599	NA	NA	rs159963-A	rs159963	0	159963	intron_variant	0	0.5826	1e-16	16		0.0301468	[0.023-0.037] unit increase	Affymetrix [~ 2500000] (imputed)	N
5	rs301817	1	8504421	rs159963	2017-08-30	27863252	Astle WJ	2016-11-17	Cell	www.ncbi.nlm.nih.gov/pubmed/27863252	The Allelic Landscape of Human Blood Cell Trait Variation and Links to Common Complex Disease.	Eosinophil counts	172,275 European ancestry individuals	NA	1p36.23	RERE	RERE			ENSG00000142599	NA	NA	rs159963-A	rs159963	0	159963	intron_variant	0	0.5826	2e-12	11.699		0.0256402	[0.019-0.033] unit increase	Affymetrix [~ 2500000] (imputed)	N
5	rs301817	1	8504421	rs159963	2017-08-30	27863252	Astle WJ	2016-11-17	Cell	www.ncbi.nlm.nih.gov/pubmed/27863252	The Allelic Landscape of Human Blood Cell Trait Variation and Links to Common Complex Disease.	Neutrophil percentage of granulocytes	170,672 European ancestry individuals	NA	1p36.23	RERE	RERE			ENSG00000142599	NA	NA	rs159963-A	rs159963	0	159963	intron_variant	0	0.5826	4e-16	15.3979		0.0296755	[0.023-0.037] unit decrease	Affymetrix [~ 2500000] (imputed)	N
5	rs301817	1	8504421	rs159963	2017-08-30	27863252	Astle WJ	2016-11-17	Cell	www.ncbi.nlm.nih.gov/pubmed/27863252	The Allelic Landscape of Human Blood Cell Trait Variation and Links to Common Complex Disease.	Eosinophil percentage of white cells	172,378 European ancestry individuals	NA	1p36.23	RERE	RERE			ENSG00000142599	NA	NA	rs159963-A	rs159963	0	159963	intron_variant	0	0.5827	2e-19	18.699		0.0328325	[0.026-0.04] unit increase	Affymetrix [~ 2500000] (imputed)	N
5	rs301817	1	8504421	rs159963	2020-09-18	32888494	Vuckovic D	2020-09-01	Cell	www.ncbi.nlm.nih.gov/pubmed/32888494	The Polygenic and Monogenic Basis of Blood Traits and Diseases.	Eosinophil counts	408,112 British individuals	NA	1p36.23	RERE	RERE			ENSG00000142599	NA	NA	rs159963-A	rs159963	0	159963	intron_variant	0	0.583477	6e-17	16.2218		0.0188369	[0.014-0.023] unit increase	Affymetrix [93095623] (imputed)	N
5	rs301817	1	8504421	rs159963	2020-09-18	32888494	Vuckovic D	2020-09-01	Cell	www.ncbi.nlm.nih.gov/pubmed/32888494	The Polygenic and Monogenic Basis of Blood Traits and Diseases.	Eosinophil percentage of white cells	408,112 British individuals	NA	1p36.23	RERE	RERE			ENSG00000142599	NA	NA	rs159963-A	rs159963	0	159963	intron_variant	0	0.58348	2e-29	28.699		0.0254016	[0.021-0.03] unit increase	Affymetrix [93095623] (imputed)	N
5	rs301817	1	8504421	rs159963	2018-07-11	29700475	Wray NR	2018-04-26	Nat Genet	www.ncbi.nlm.nih.gov/pubmed/29700475	Genome-wide association analyses identify 44 risk variants and refine the genetic architecture of major depression.	Depression	135,458 European ancestry cases, 344,901 European ancestry controls	NA	1p36.23	RERE, SLC45A1	RERE			ENSG00000142599	NA	NA	rs159963-C	rs159963	0	159963	intron_variant	0	0.44	3e-08	7.52288		1.03093	[1.02-1.04]	NR [9622763] (imputed)	N
5	rs301817	1	8504421	rs159963	2019-02-08	30595370	Kichaev G	2018-12-27	Am J Hum Genet	www.ncbi.nlm.nih.gov/pubmed/30595370	Leveraging Polygenic Functional Enrichment to Improve GWAS Power.	Eosinophil counts	approximately 440,000 European ancestry individuals	NA	1p36.23		RERE			ENSG00000142599	NA	NA	rs159963-?	rs159963	0	159963	intron_variant	0	NR	6e-28	27.2218		NA		NR [~ 8900000] (imputed)	N
5	rs301817	1	8504421	rs159963	2019-02-08	30595370	Kichaev G	2018-12-27	Am J Hum Genet	www.ncbi.nlm.nih.gov/pubmed/30595370	Leveraging Polygenic Functional Enrichment to Improve GWAS Power.	Respiratory diseases	approximately 459,000 European ancestry individuals	NA	1p36.23		RERE			ENSG00000142599	NA	NA	rs159963-?	rs159963	0	159963	intron_variant	0	NR	1e-11	11		NA		NR [~ 8900000] (imputed)	N
5	rs301817	1	8504421	rs159963	2021-12-14	34594039	Sakaue S	2021-09-30	Nat Genet	www.ncbi.nlm.nih.gov/pubmed/34594039	A cross-population atlas of genetic associations for 220 human phenotypes.	Lymphocyte count	349,856 European ancestry individuals, 95,717 East Asian ancestry individuals	NA	1p36.23		RERE			ENSG00000142599	NA	NA	rs159963-A	rs159963	0	159963	intron_variant	0	NR	2e-11	10.699		0.015	[0.011-0.019] unit decrease	Affymetrix, Illumina [20531022] (imputed)	N
5	rs301817	1	8504421	rs159963	2021-12-14	34594039	Sakaue S	2021-09-30	Nat Genet	www.ncbi.nlm.nih.gov/pubmed/34594039	A cross-population atlas of genetic associations for 220 human phenotypes.	Eosinophil counts	349,856 European ancestry individuals, 93,063 East Asian ancestry individuals	NA	1p36.23		RERE			ENSG00000142599	NA	NA	rs159963-A	rs159963	0	159963	intron_variant	0	NR	7e-23	22.1549		0.0169	[0.014-0.02] unit increase	Affymetrix, Illumina [20529668] (imputed)	N
5	rs301817	1	8505058	rs301816	2020-06-04	32296059	Han Y	2020-04-15	Nat Commun	www.ncbi.nlm.nih.gov/pubmed/32296059	Genome-wide analysis highlights contribution of immune system pathways to the genetic architecture of asthma.	Asthma	64,538 European ancestry cases, 239,321 European ancestry controls	NR	1p36.23	RERE	RERE			ENSG00000142599	NA	NA	rs301816-A	rs301816	0	301816	intron_variant	0	0.578784	5e-14	13.301		1.04708	[1.03460746255146-1.05970138989138]	NR [9572556] (imputed)	N
5	rs301817	1	8505058	rs301816	2019-05-14	30929738	Ferreira MAR	2019-03-28	Am J Hum Genet	www.ncbi.nlm.nih.gov/pubmed/30929738	Genetic Architectures of Childhood- and Adult-Onset Asthma Are Partly Distinct.	Asthma	40,544 European ancestry cases, 300,671 European ancestry controls	NA	1p36.23	RERE	RERE			ENSG00000142599	NA	NA	rs301816-A	rs301816	0	301816	intron_variant	0	NR	1e-12	12		1.05	[1.04-1.06]	Affymetrix [9000000] (imputed)	N
5	rs301817	1	8505058	rs301816	2019-05-14	30929738	Ferreira MAR	2019-03-28	Am J Hum Genet	www.ncbi.nlm.nih.gov/pubmed/30929738	Genetic Architectures of Childhood- and Adult-Onset Asthma Are Partly Distinct.	Asthma (adult onset)	26,582 European ancestry cases, 300,671 European ancestry controls	16,297 European ancestry cases, 217,711 European ancestry controls	1p36.23	RERE	RERE			ENSG00000142599	NA	NA	rs301816-A	rs301816	0	301816	intron_variant	0	0.583	5e-06	5.30103		1.034	[1.02-1.05]	Affymetrix [9000000] (imputed)	N
5	rs301817	1	8505058	rs301816	2021-09-30	34045744	Levey DF	2021-05-27	Nat Neurosci	www.ncbi.nlm.nih.gov/pubmed/34045744	Bi-ancestral depression GWAS in the Million Veteran Program and meta-analysis in >1.2 million individuals highlight new therapeutic directions.	Major depressive disorder	340,591 European ancestry cases, 813,676 European ancestry controls	455,350 cases, 887,428 controls	1p36.23		RERE			ENSG00000142599	NA	NA	rs301816-?	rs301816	0	301816	intron_variant	0	NR	4e-20	19.3979		0.025	unit decrease	NR [NR]	N
5	rs12075458	1	8524877	rs12080583	2020-09-21	32888493	Chen MH	2020-09-01	Cell	www.ncbi.nlm.nih.gov/pubmed/32888493	Trans-ethnic and Ancestry-Specific Blood-Cell Genetics in 746,667 Individuals from 5 Global Populations.	Lymphocyte count	643,370 African American or Afro-Caribbean, African ancestry, European ancestry, East Asian ancestry, Hispanic or Latin American and South Asian ancestry individuals	NA	1p36.23	NR	RERE			ENSG00000142599	NA	NA	rs12080583-A	rs12080583	0	12080583	intron_variant	0	0.6552	1e-22	22		NA		Affymetrix, Illumina [23472807] (imputed)	N
5	rs12075458	1	8526142	rs4908760	2010-05-18	20410501	Jin Y	2010-04-21	N Engl J Med	www.ncbi.nlm.nih.gov/pubmed/20410501	Variant of TYR and autoimmunity susceptibility loci in generalized vitiligo.	Vitiligo	1,392 European ancestry cases, 2,629 European ancestry controls	647 European ancestry cases, 1,056 European ancestry controls, 183 European ancestry trios, 1,383 European ancestry individuals from 332 families	1p36.23	RERE	RERE			ENSG00000142599	NA	NA	rs4908760-G	rs4908760	0	4908760	intron_variant	0	0.37	7e-15	14.1549		1.36	[1.26-1.48]	Illumina [520460]	N
5	rs12075458	1	8526142	rs4908760	2019-04-18	30617275	Erzurumluoglu AM	2019-01-07	Mol Psychiatry	www.ncbi.nlm.nih.gov/pubmed/30617275	Meta-analysis of up to 622,409 individuals identifies 40 novel smoking behaviour associated genetic loci.	Smoking initiation	324,851 European ancestry individuals, 21,962 South Asian ancestry individuals	up to 275,596 European ancestry individuals	1p36.23	RERE	RERE			ENSG00000142599	NA	NA	rs4908760-A	rs4908760	0	4908760	intron_variant	0	0.35	2e-08	7.69897		0.0078	[0.0019-0.0137] unit increase (replication)	Affymetrix, Illumina [up to 1207583] (imputed)	N
5	rs12075458	1	8526142	rs4908760	2022-08-04	35710981	Liu H	2022-06-16	Nat Genet	www.ncbi.nlm.nih.gov/pubmed/35710981	Epigenomic and transcriptomic analyses define core cell types, genes and targetable mechanisms for kidney disease.	Estimated glomerular filtration rate (creatinine)	1,205,871 European ancestry individuals, 168,300 East Asian ancestry individuals, 63,553 African ancestry individuals, 23,509 Hispanic or Latin American individuals, 22,103 African American individuals, 21,791 Central Asian or South Asian ancestry individuals, 1,502 Middle Eastern ancestry individuals, 939 other admixed ancestry individuals, 602 Native American ancestry individuals, 150 Asian anc…	NA	1p36.23		RERE			ENSG00000142599	NA	NA	rs4908760-A	rs4908760	0	4908760	intron_variant	0	0.6493	6e-09	8.22185		5.827	z score decrease	Affymetrix, Illumina [12653804] (imputed)	N
5	rs301817	1	8537289	rs1884352	2019-03-18	30643256	Baselmans BML	2019-01-14	Nat Genet	www.ncbi.nlm.nih.gov/pubmed/30643256	Multivariate genome-wide analyses of the well-being spectrum.	Depressive symptoms	1,067,913 European ancestry individuals	228,033 European ancestry individuals	1p36.23	NR	RERE			ENSG00000142599	NA	NA	rs1884352-A	rs1884352	0	1884352	intron_variant	0	0.607148	8e-12	11.0969		0.00665186	[0.0047-0.0086] unit decrease	NR [NR]	N
5	rs301817	1	8537289	rs1884352	2019-03-18	30643256	Baselmans BML	2019-01-14	Nat Genet	www.ncbi.nlm.nih.gov/pubmed/30643256	Multivariate genome-wide analyses of the well-being spectrum.	Positive affect	410,603 European ancestry individuals	NA	1p36.23	NR	RERE			ENSG00000142599	NA	NA	rs1884352-A	rs1884352	0	1884352	intron_variant	0	0.607148	1e-11	11		0.00797125	[0.0057-0.0103] unit decrease	NR [NR]	N
5	rs301817	1	8537289	rs1884352	2019-03-18	30643256	Baselmans BML	2019-01-14	Nat Genet	www.ncbi.nlm.nih.gov/pubmed/30643256	Multivariate genome-wide analyses of the well-being spectrum.	Neuroticism	523,783 European ancestry individuals	59,206 European ancestry individuals	1p36.23	NR	RERE			ENSG00000142599	NA	NA	rs1884352-A	rs1884352	0	1884352	intron_variant	0	0.607148	1e-11	11		0.010343	[0.0074-0.0133] unit decrease	NR [NR]	N
5	rs12075458	1	8581253	rs71509050	2021-12-14	34594039	Sakaue S	2021-09-30	Nat Genet	www.ncbi.nlm.nih.gov/pubmed/34594039	A cross-population atlas of genetic associations for 220 human phenotypes.	Body mass index	359,983 European ancestry individuals, 163,835 East Asian ancestry individuals	NA	1p36.23		RERE			ENSG00000142599	NA	NA	rs71509050-A	rs71509050	0	71509050	intron_variant	0	NR	3e-08	7.52288		0.0118	[0.0077-0.0159] unit increase	Affymetrix, Illumina [20538802] (imputed)	N
5	rs12075458	1	8591162	rs12131864	2020-09-21	32888493	Chen MH	2020-09-01	Cell	www.ncbi.nlm.nih.gov/pubmed/32888493	Trans-ethnic and Ancestry-Specific Blood-Cell Genetics in 746,667 Individuals from 5 Global Populations.	Lymphocyte count	524,923 European ancestry individuals	NA	1p36.23	NR	RERE			ENSG00000142599	NA	NA	rs12131864-G	rs12131864	0	12131864	intron_variant	0	0.630752	3e-23	22.5229		0.019495	[0.016-0.023] SD unit decrease	Affymetrix, Illumina [50265552] (imputed)	N
5	rs12075458	1	8647917	rs6670508	2019-02-08	30595370	Kichaev G	2018-12-27	Am J Hum Genet	www.ncbi.nlm.nih.gov/pubmed/30595370	Leveraging Polygenic Functional Enrichment to Improve GWAS Power.	Cardiovascular disease	approximately 459,000 European ancestry individuals	NA	1p36.23		RERE			ENSG00000142599	NA	NA	rs6670508-?	rs6670508	0	6670508	intron_variant	0	NR	7e-08	7.1549		NA		NR [~ 8900000] (imputed)	N
5	rs12075458	1	8650185	rs7526171	2019-03-18	30643256	Baselmans BML	2019-01-14	Nat Genet	www.ncbi.nlm.nih.gov/pubmed/30643256	Multivariate genome-wide analyses of the well-being spectrum.	Life satisfaction	80,852 European ancestry individuals	NA	1p36.23	NR	RERE			ENSG00000142599	NA	NA	rs7526171-C	rs7526171	0	7526171	intron_variant	0	0.625438	6e-09	8.22185		0.00817121	[0.0054-0.0109] unit decrease	NR [NR]	N
5	rs12075458	1	8659282	rs2100888	2019-01-22	29500382	Nagel M	2018-03-02	Nat Commun	www.ncbi.nlm.nih.gov/pubmed/29500382	Item-level analyses reveal genetic heterogeneity in neuroticism.	Feeling tense	371,318 European ancestry individuals	NA	1p36.23	ENO1	RERE			ENSG00000142599	NA	NA	rs2100888-A	rs2100888	0	2100888	intron_variant	0	0.365649	8e-10	9.09691		6.14	z score decrease	NR [10847151] (imputed)	N
5	rs12075458	1	8659714	rs4480384	2021-06-23	34103634	Valette K	2021-06-08	Commun Biol	www.ncbi.nlm.nih.gov/pubmed/34103634	Prioritization of candidate causal genes for asthma in susceptibility loci derived from UK Biobank.	Asthma	56,167 White-British ancestry cases, 352,255 White-British ancestry controls	NA	1p36.23	RERE	RERE			ENSG00000142599	NA	NA	rs4480384-G	rs4480384	0	4480384	intron_variant	0	0.643257	3e-10	9.52288		0.043097	[0.03-0.056] unit increase	Affymetrix [35186738] (imputed)	N
5	rs12075458	1	8663821	rs12136766	2021-12-15	34560273	Shadrin AA	2021-09-21	Neuroimage	www.ncbi.nlm.nih.gov/pubmed/34560273	Vertex-wise multivariate genome-wide association study identifies 780 unique genetic loci associated with cortical morphology.	Cortical thickness	35,657 White British ancestry individuals	NA	1p36.23	NR	RERE			ENSG00000142599	NA	NA	rs12136766-G	rs12136766	0	12136766	intron_variant	0	0.3513	1e-11	11		NA		NR [9056863] (imputed)	N
5	rs12075458	1	8690933	rs1381928	2020-04-17	31669095	Zhu Z	2019-10-24	J Allergy Clin Immunol	www.ncbi.nlm.nih.gov/pubmed/31669095	Shared Genetic and Experimental Links between Obesity-Related Traits and Asthma Subtypes in UK Biobank.	Nonatopic asthma and/or BMI	28,862 European ancestry cases, 422,048 European ancestry controls, 6,912 European ancestry individuals	NA	1p36.23	NR	RERE			ENSG00000142599	NA	NA	rs1381928-G	rs1381928	0	1381928	intron_variant	0	NR	4e-10	9.39794		NA		Affymetrix [~ 8270000] (imputed)	N
5	rs12075458	1	8693324	rs2401137	2017-12-01	28928442	Tian C	2017-09-19	Nat Commun	www.ncbi.nlm.nih.gov/pubmed/28928442	Genome-wide association and HLA region fine-mapping studies identify susceptibility loci for multiple common infections.	Tonsillectomy	60,098 European ancestry cases, 113,323 European ancestry controls	NA	1p36.23	NR	RERE			ENSG00000142599	NA	NA	rs2401137-?	rs2401137	0	2401137	intron_variant	0	NR	2e-07	6.69897		0.0439	[0.027-0.06] unit increase	Illumina [at least 560000] (imputed)	N
5	rs12075458	1	8708529	rs11121210	2019-11-05	30239722	Pulit SL	2018-09-14	Hum Mol Genet	www.ncbi.nlm.nih.gov/pubmed/30239722	Meta-analysis of genome-wide association studies for body fat distribution in 694,649 individuals of European ancestry.	Body mass index	806,834 European ancestry individuals	NA	1p36.23	NA	RERE			ENSG00000142599	NA	NA	rs11121210-T	rs11121210	0	11121210	intron_variant	0	0.3445	2e-10	9.69897		0.0111	[0.0078-0.0144] unit decrease	NR [~ 27400000] (imputed)	N
5	rs12075458	1	8724522	rs10864360	2020-04-17	31669095	Zhu Z	2019-10-24	J Allergy Clin Immunol	www.ncbi.nlm.nih.gov/pubmed/31669095	Shared Genetic and Experimental Links between Obesity-Related Traits and Asthma Subtypes in UK Biobank.	Asthma (childhood onset)	13,435 European ancestry cases, 393,186 European ancestry controls	NA	1p36.23	NR	RERE			ENSG00000142599	NA	NA	rs10864360-?	rs10864360	0	10864360	intron_variant	0	NR	4e-09	8.39794		NA		Affymetrix [~ 8270000] (imputed)	N
5	rs12075458	1	8730779	rs6695867	2018-10-31	29942085	Nagel M	2018-06-25	Nat Genet	www.ncbi.nlm.nih.gov/pubmed/29942085	Meta-analysis of genome-wide association studies for neuroticism in 449,484 individuals identifies novel genetic loci and pathways.	Depression	688,809 European ancestry individuals	NA	1p36.23	NR	RERE			ENSG00000142599	NA	NA	rs6695867-A	rs6695867	0	6695867	intron_variant	0	NR	5e-09	8.30103		5.855	z score decrease	Affymetrix [10847151] (imputed)	N
5	rs12075458	1	8738937	rs4908507	2022-11-23	35164939	van der Meer D	2022-02-11	Biol Psychiatry	www.ncbi.nlm.nih.gov/pubmed/35164939	Boosting Schizophrenia Genetics by Utilizing Genetic Overlap With Brain Morphology.	Brain morphology (MOSTest)	33,735 white British ancestry individuals	NA	1p36.23		RERE			ENSG00000142599	NA	NA	rs4908507-?	rs4908507	0	4908507	intron_variant	0	NR	3e-08	7.52288		NA		NR [9061072] (imputed)	N
5	rs12075458	1	8894346	rs12068123	2017-05-11	27182965	Pickrell JK	2016-05-16	Nat Genet	www.ncbi.nlm.nih.gov/pubmed/27182965	Detection and interpretation of shared genetic influences on 42 human traits.	Tonsillectomy	60,098 European ancestry cases, 113,323 European ancestry controls	NA	1p36.23	RERE, ENO1	RERE			ENSG00000142599	NA	NA	rs12068123-?	rs12068123	0	12068123	intron_variant	0	NR	6e-09	8.22185		1.049	[1.032-1.066]	Illumina [13757430] (imputed)	N
5	rs12075458	1	8894346	rs12068123	2017-12-01	28928442	Tian C	2017-09-19	Nat Commun	www.ncbi.nlm.nih.gov/pubmed/28928442	Genome-wide association and HLA region fine-mapping studies identify susceptibility loci for multiple common infections.	Tonsillectomy	60,098 European ancestry cases, 113,323 European ancestry controls	NA	1p36.23	RERE, ENO1	RERE			ENSG00000142599	NA	NA	rs12068123-G	rs12068123	0	12068123	intron_variant	0	0.45	6e-09	8.22185		1.05	[1.04-1.06]	Illumina [at least 560000] (imputed)	N
5	rs12075458	1	8894357	rs11121240	2019-05-14	30929738	Ferreira MAR	2019-03-28	Am J Hum Genet	www.ncbi.nlm.nih.gov/pubmed/30929738	Genetic Architectures of Childhood- and Adult-Onset Asthma Are Partly Distinct.	Asthma	40,544 European ancestry cases, 300,671 European ancestry controls	NA	1p36.23	RERE, ENO1	RERE			ENSG00000142599	NA	NA	rs11121240-T	rs11121240	0	11121240	intron_variant	0	NR	2e-09	8.69897		1.042	[1.03-1.06]	Affymetrix [9000000] (imputed)	N
6	rs12125606	1	12546694	rs12125606	2022-03-07	34910505	van der Meer D	2021-12-15	Sci Adv	www.ncbi.nlm.nih.gov/pubmed/34910505	The genetic architecture of human cortical folding.	Vertex-wise cortical thickness	33,748 European ancestry individuals	NA	1p36.22		VPS13D			ENSG00000048707	NA	NA	rs12125606-T	rs12125606	0	12125606	intron_variant	0	0.24	6e-09	8.22185		5.81	z score increase	Affymetrix [9061022] (imputed)	N
7	rs11260715	1	16555105	rs41269189	2022-08-04	35710981	Liu H	2022-06-16	Nat Genet	www.ncbi.nlm.nih.gov/pubmed/35710981	Epigenomic and transcriptomic analyses define core cell types, genes and targetable mechanisms for kidney disease.	Estimated glomerular filtration rate (creatinine)	1,205,871 European ancestry individuals, 168,300 East Asian ancestry individuals, 63,553 African ancestry individuals, 23,509 Hispanic or Latin American individuals, 22,103 African American individuals, 21,791 Central Asian or South Asian ancestry individuals, 1,502 Middle Eastern ancestry individuals, 939 other admixed ancestry individuals, 602 Native American ancestry individuals, 150 Asian anc…	NA	1p36.13		ANO7L1 - CPLANE2	ENSG00000237276	ENSG00000132881		583	3082	rs41269189-T	rs41269189	0	41269189	upstream_gene_variant	1	0.303	3e-13	12.5229		7.309	z score decrease	Affymetrix, Illumina [12653804] (imputed)	N
7	rs11260715	1	16556786	rs34966560	2019-07-05	31152163	Wuttke M	2019-05-31	Nat Genet	www.ncbi.nlm.nih.gov/pubmed/31152163	A catalog of genetic loci associated with kidney function from analyses of a million individuals.	Estimated glomerular filtration rate	567,460 European ancestry individuals, 165,726 East Asian ancestry individuals, 13,842 African American individuals, 13,359 South Asian ancestry individuals, 4,961 Hispanic individuals	216,518 European ancestry individuals, 64,204 non-Hispanic black individuals	1p36.13	RSG1	ANO7L1 - CPLANE2	ENSG00000237276	ENSG00000132881		2264	1401	rs34966560-T	rs34966560	0	34966560	non_coding_transcript_exon_variant	1	0.2945	1e-10	10		0.0023	[0.0017-0.0029] unit decrease	Affymetrix, Illumina [8221591] (imputed)	N
7	rs11260715	1	16557691	rs11260709	2019-07-05	31152163	Wuttke M	2019-05-31	Nat Genet	www.ncbi.nlm.nih.gov/pubmed/31152163	A catalog of genetic loci associated with kidney function from analyses of a million individuals.	Estimated glomerular filtration rate	567,460 European ancestry individuals	216,518 European ancestry individuals	1p36.13	RSG1	ANO7L1 - CPLANE2	ENSG00000237276	ENSG00000132881		3169	496	rs11260709-T	rs11260709	0	11260709	non_coding_transcript_exon_variant	1	0.6799	1e-09	9		0.0024	[0.0016-0.0032] unit increase	Affymetrix, Illumina [8834748] (imputed)	N
7	rs11260715	1	16568613	rs4661727	2021-12-15	34560273	Shadrin AA	2021-09-21	Neuroimage	www.ncbi.nlm.nih.gov/pubmed/34560273	Vertex-wise multivariate genome-wide association study identifies 780 unique genetic loci associated with cortical morphology.	Cortical surface area	35,657 White British ancestry individuals	NA	1p36.13	NR	MT1XP1 - FBXO42	ENSG00000233929	ENSG00000037637		720	4722	rs4661727-C	rs4661727	0	4661727	upstream_gene_variant	1	0.3806	3e-09	8.52288		NA		NR [9056863] (imputed)	N
7	rs11260715	1	16568613	rs4661727	2022-03-07	34910505	van der Meer D	2021-12-15	Sci Adv	www.ncbi.nlm.nih.gov/pubmed/34910505	The genetic architecture of human cortical folding.	Vertex-wise cortical thickness	33,748 European ancestry individuals	NA	1p36.13		MT1XP1 - FBXO42	ENSG00000233929	ENSG00000037637		720	4722	rs4661727-C	rs4661727	0	4661727	upstream_gene_variant	1	0.34	2e-12	11.699		7.04	z score increase	Affymetrix [9061022] (imputed)	N
7	rs11260715	1	16568613	rs4661727	2022-03-07	34910505	van der Meer D	2021-12-15	Sci Adv	www.ncbi.nlm.nih.gov/pubmed/34910505	The genetic architecture of human cortical folding.	Vertex-wise sulcal depth	33,748 European ancestry individuals	NA	1p36.13		MT1XP1 - FBXO42	ENSG00000233929	ENSG00000037637		720	4722	rs4661727-C	rs4661727	0	4661727	upstream_gene_variant	1	0.34	3e-22	21.5229		9.7	z score increase	Affymetrix [9061022] (imputed)	N
7	rs11260715	1	16568613	rs4661727	2021-12-15	34560273	Shadrin AA	2021-09-21	Neuroimage	www.ncbi.nlm.nih.gov/pubmed/34560273	Vertex-wise multivariate genome-wide association study identifies 780 unique genetic loci associated with cortical morphology.	Cortical thickness	35,657 White British ancestry individuals	NA	1p36.13	NR	MT1XP1 - FBXO42	ENSG00000233929	ENSG00000037637		720	4722	rs4661727-C	rs4661727	0	4661727	upstream_gene_variant	1	0.3806	6e-10	9.22185		NA		NR [9056863] (imputed)	N
7	rs11260715	1	16691023	rs6663056	2022-11-23	35164939	van der Meer D	2022-02-11	Biol Psychiatry	www.ncbi.nlm.nih.gov/pubmed/35164939	Boosting Schizophrenia Genetics by Utilizing Genetic Overlap With Brain Morphology.	Brain morphology (MOSTest)	33,735 white British ancestry individuals	NA	1p36.13		SZRD1			ENSG00000055070	NA	NA	rs6663056-?	rs6663056	0	6663056	intron_variant	0	NR	1e-09	9		NA		NR [9061072] (imputed)	N
8	rs761422	1	17287414	rs2273113	2020-09-18	32888494	Vuckovic D	2020-09-01	Cell	www.ncbi.nlm.nih.gov/pubmed/32888494	The Polygenic and Monogenic Basis of Blood Traits and Diseases.	Hematocrit	408,112 British individuals	NA	1p36.13	CROCC	CROCC			ENSG00000058453	NA	NA	rs2273113-C	rs2273113	0	2273113	synonymous_variant	0	0.430372	8e-11	10.0969		0.014578	[0.01-0.019] unit increase	Affymetrix [93095623] (imputed)	N
8	rs761422	1	17287414	rs2273113	2020-09-21	32888493	Chen MH	2020-09-01	Cell	www.ncbi.nlm.nih.gov/pubmed/32888493	Trans-ethnic and Ancestry-Specific Blood-Cell Genetics in 746,667 Individuals from 5 Global Populations.	Red blood cell count	545,203 European ancestry individuals	NA	1p36.13	NR	CROCC			ENSG00000058453	NA	NA	rs2273113-C	rs2273113	0	2273113	synonymous_variant	0	0.429587	6e-12	11.2218		0.013522	[0.0097-0.0174] SD unit increase	Affymetrix, Illumina [50628390] (imputed)	N
8	rs761422	1	17287414	rs2273113	2019-02-08	30595370	Kichaev G	2018-12-27	Am J Hum Genet	www.ncbi.nlm.nih.gov/pubmed/30595370	Leveraging Polygenic Functional Enrichment to Improve GWAS Power.	Red blood cell count	approximately 445,000 European ancestry individuals	NA	1p36.13		CROCC			ENSG00000058453	NA	NA	rs2273113-?	rs2273113	0	2273113	synonymous_variant	0	NR	6e-10	9.22185		NA		NR [~ 8900000] (imputed)	N
8	rs761422	1	17287414	rs2273113	2020-09-18	32888494	Vuckovic D	2020-09-01	Cell	www.ncbi.nlm.nih.gov/pubmed/32888494	The Polygenic and Monogenic Basis of Blood Traits and Diseases.	Red blood cell count	408,112 British individuals	NA	1p36.13	CROCC	CROCC			ENSG00000058453	NA	NA	rs2273113-C	rs2273113	0	2273113	synonymous_variant	0	0.43039	1e-09	9		0.0135794	[0.0092-0.018] unit increase	Affymetrix [93095623] (imputed)	N
8	rs2311528	1	17289911	rs6691985	2021-08-24	34021172	Christakoudi S	2021-05-21	Sci Rep	www.ncbi.nlm.nih.gov/pubmed/34021172	GWAS of allometric body-shape indices in UK Biobank identifies loci suggesting associations with morphogenesis, organogenesis, adrenal cell renewal and cancer.	Waist circumference adjusted for body mass index	219,872 British ancestry women	NA	1p36.13	CROCC	CROCC			ENSG00000058453	NA	NA	rs6691985-T	rs6691985	0	6691985	intron_variant	0	NR	6e-21	20.2218		0.0291142	[0.023-0.035] unit decrease	Affymetrix [321114] (imputed)	N
8	rs2311528	1	17289911	rs6691985	2021-08-24	34021172	Christakoudi S	2021-05-21	Sci Rep	www.ncbi.nlm.nih.gov/pubmed/34021172	GWAS of allometric body-shape indices in UK Biobank identifies loci suggesting associations with morphogenesis, organogenesis, adrenal cell renewal and cancer.	Waist-hip index	219,872 British ancestry women	NA	1p36.13	CROCC	CROCC			ENSG00000058453	NA	NA	rs6691985-T	rs6691985	0	6691985	intron_variant	0	NR	5e-08	7.30103		0.0167636	[0.011-0.023] unit decrease	Affymetrix [319769] (imputed)	N
8	rs2311528	1	17301448	rs2235933	2021-08-24	34021172	Christakoudi S	2021-05-21	Sci Rep	www.ncbi.nlm.nih.gov/pubmed/34021172	GWAS of allometric body-shape indices in UK Biobank identifies loci suggesting associations with morphogenesis, organogenesis, adrenal cell renewal and cancer.	A body shape index	219,872 British ancestry women	NA	1p36.13	MFAP2	MFAP2			ENSG00000117122	NA	NA	rs2235933-T	rs2235933	0	2235933	synonymous_variant	0	NR	3e-14	13.5229		0.0242745	[0.018-0.031] unit decrease	Affymetrix [321169] (imputed)	N
8	rs2311528	1	17301448	rs2235933	2021-08-24	34021172	Christakoudi S	2021-05-21	Sci Rep	www.ncbi.nlm.nih.gov/pubmed/34021172	GWAS of allometric body-shape indices in UK Biobank identifies loci suggesting associations with morphogenesis, organogenesis, adrenal cell renewal and cancer.	Hip circumference adjusted for BMI	219,872 British ancestry women	NA	1p36.13	MFAP2	MFAP2			ENSG00000117122	NA	NA	rs2235933-T	rs2235933	0	2235933	synonymous_variant	0	NR	3e-14	13.5229		0.0238742	[0.018-0.03] unit decrease	Affymetrix [321016] (imputed)	N
8	rs761422	1	17301672	rs761423	2019-11-05	30239722	Pulit SL	2018-09-14	Hum Mol Genet	www.ncbi.nlm.nih.gov/pubmed/30239722	Meta-analysis of genome-wide association studies for body fat distribution in 694,649 individuals of European ancestry.	Body mass index	806,834 European ancestry individuals	NA	1p36.13	NA	MFAP2			ENSG00000117122	NA	NA	rs761423-T	rs761423	0	761423	intron_variant	0	0.5412	7e-10	9.1549		0.0105	[0.0072-0.0138] unit increase	NR [~ 27400000] (imputed)	N
8	rs761422	1	17301672	rs761423	2020-04-17	31669095	Zhu Z	2019-10-24	J Allergy Clin Immunol	www.ncbi.nlm.nih.gov/pubmed/31669095	Shared Genetic and Experimental Links between Obesity-Related Traits and Asthma Subtypes in UK Biobank.	Body mass index	457,822 European ancestry individuals	NA	1p36.13	NR	MFAP2			ENSG00000117122	NA	NA	rs761423-?	rs761423	0	761423	intron_variant	0	NR	2e-08	7.69897		NA		Affymetrix [~ 8270000] (imputed)	N
8	rs761422	1	17301672	rs761423	2021-08-24	34021172	Christakoudi S	2021-05-21	Sci Rep	www.ncbi.nlm.nih.gov/pubmed/34021172	GWAS of allometric body-shape indices in UK Biobank identifies loci suggesting associations with morphogenesis, organogenesis, adrenal cell renewal and cancer.	A body shape index	219,872 British ancestry women	NA	1p36.13	MFAP2	MFAP2			ENSG00000117122	NA	NA	rs761423-C	rs761423	0	761423	intron_variant	0	NR	6e-11	10.2218		0.0187203	[0.013-0.024] unit increase	Affymetrix [321169] (imputed)	N
8	rs761422	1	17301672	rs761423	2021-08-24	34021172	Christakoudi S	2021-05-21	Sci Rep	www.ncbi.nlm.nih.gov/pubmed/34021172	GWAS of allometric body-shape indices in UK Biobank identifies loci suggesting associations with morphogenesis, organogenesis, adrenal cell renewal and cancer.	Waist circumference adjusted for body mass index	186,825 British ancestry men	NA	1p36.13	MFAP2	MFAP2			ENSG00000117122	NA	NA	rs761423-C	rs761423	0	761423	intron_variant	0	NR	1e-12	12		0.0219833	[0.016-0.028] unit increase	Affymetrix [321114] (imputed)	N
8	rs761422	1	17301672	rs761423	2021-08-24	34021172	Christakoudi S	2021-05-21	Sci Rep	www.ncbi.nlm.nih.gov/pubmed/34021172	GWAS of allometric body-shape indices in UK Biobank identifies loci suggesting associations with morphogenesis, organogenesis, adrenal cell renewal and cancer.	Waist circumference adjusted for body mass index	219,872 British ancestry women	NA	1p36.13	MFAP2	MFAP2			ENSG00000117122	NA	NA	rs761423-C	rs761423	0	761423	intron_variant	0	NR	1e-19	19		0.0258364	[0.02-0.031] unit increase	Affymetrix [321114] (imputed)	N
8	rs761422	1	17301672	rs761423	2021-08-24	34021172	Christakoudi S	2021-05-21	Sci Rep	www.ncbi.nlm.nih.gov/pubmed/34021172	GWAS of allometric body-shape indices in UK Biobank identifies loci suggesting associations with morphogenesis, organogenesis, adrenal cell renewal and cancer.	Hip circumference adjusted for BMI	186,825 British ancestry men	NA	1p36.13	MFAP2	MFAP2			ENSG00000117122	NA	NA	rs761423-C	rs761423	0	761423	intron_variant	0	NR	2e-15	14.699		0.0243503	[0.018-0.03] unit increase	Affymetrix [323123] (imputed)	N
8	rs761422	1	17301780	rs761422	2019-02-08	30595370	Kichaev G	2018-12-27	Am J Hum Genet	www.ncbi.nlm.nih.gov/pubmed/30595370	Leveraging Polygenic Functional Enrichment to Improve GWAS Power.	Lung function (FVC)	approximately 372,000 European ancestry individuals	NA	1p36.13		MFAP2			ENSG00000117122	NA	NA	rs761422-?	rs761422	0	761422	synonymous_variant	0	NR	4e-23	22.3979		NA		NR [~ 8900000] (imputed)	N
8	rs761422	1	17301780	rs761422	2021-08-24	34021172	Christakoudi S	2021-05-21	Sci Rep	www.ncbi.nlm.nih.gov/pubmed/34021172	GWAS of allometric body-shape indices in UK Biobank identifies loci suggesting associations with morphogenesis, organogenesis, adrenal cell renewal and cancer.	Hip circumference adjusted for BMI	219,872 British ancestry women	NA	1p36.13	MFAP2	MFAP2			ENSG00000117122	NA	NA	rs761422-G	rs761422	0	761422	synonymous_variant	0	NR	5e-15	14.301		0.0219307	[0.016-0.027] unit increase	Affymetrix [321016] (imputed)	N
8	rs2235932	1	17303589	rs2235932	2018-11-16	30072576	Emilsson V	2018-08-02	Science	www.ncbi.nlm.nih.gov/pubmed/30072576	Co-regulatory networks of human serum proteins link genetics to disease.	Blood protein levels	3,200 European ancestry individuals	NA	1p36.13	NR	MFAP2			ENSG00000117122	NA	NA	rs2235932-C	rs2235932	0	2235932	non_coding_transcript_exon_variant	0	0.35375	2e-13	12.699	(MFAP2, 9294_45_3)	0.179449	[0.13-0.23] unit decrease	Illumina [> 1000000] (imputed)	N
8	rs2235932	1	17303589	rs2235932	2018-11-16	30072576	Emilsson V	2018-08-02	Science	www.ncbi.nlm.nih.gov/pubmed/30072576	Co-regulatory networks of human serum proteins link genetics to disease.	Blood protein levels	3,200 European ancestry individuals	NA	1p36.13	NR	MFAP2			ENSG00000117122	NA	NA	rs2235932-C	rs2235932	0	2235932	non_coding_transcript_exon_variant	0	0.35375	1e-11	11	(SCGB1A1, 10569_28_3)	0.175055	[0.12-0.23] unit decrease	Illumina [> 1000000] (imputed)	N
8	rs2235932	1	17303589	rs2235932	2021-08-24	34021172	Christakoudi S	2021-05-21	Sci Rep	www.ncbi.nlm.nih.gov/pubmed/34021172	GWAS of allometric body-shape indices in UK Biobank identifies loci suggesting associations with morphogenesis, organogenesis, adrenal cell renewal and cancer.	Waist circumference adjusted for body mass index	219,872 British ancestry women	NA	1p36.13	MFAP2	MFAP2			ENSG00000117122	NA	NA	rs2235932-C	rs2235932	0	2235932	non_coding_transcript_exon_variant	0	NR	2e-16	15.699		0.0239644	[0.018-0.03] unit decrease	Affymetrix [321114] (imputed)	N
8	rs9435672	1	17306029	rs9435731	2019-05-01	30804561	Sakornsakolpat P	2019-02-25	Nat Genet	www.ncbi.nlm.nih.gov/pubmed/30804561	Genetic landscape of chronic obstructive pulmonary disease identifies heterogeneous cell-type and phenotype associations.	Chronic obstructive pulmonary disease	35,735 cases, 222,076 controls	NA	1p36.13	MFAP2	MFAP2			ENSG00000117122	NA	NA	rs9435731-A	rs9435731	0	9435731	intron_variant	0	0.51	7e-10	9.1549		1.06	[1.04-1.08]	Affymetrix, Illumina [6224355] (imputed)	N
8	rs9435672	1	17306029	rs9435731	2021-12-14	34594039	Sakaue S	2021-09-30	Nat Genet	www.ncbi.nlm.nih.gov/pubmed/34594039	A cross-population atlas of genetic associations for 220 human phenotypes.	Height	360,388 European ancestry individuals, 165,056 East Asian ancestry individuals	NA	1p36.13		MFAP2			ENSG00000117122	NA	NA	rs9435731-A	rs9435731	0	9435731	intron_variant	0	NR	4e-100	99.3979		0.0278	[0.025-0.03] unit increase	Affymetrix, Illumina [20538915] (imputed)	N
8	rs9435672	1	17306596	rs2284747	2020-11-04	33097823	Pei YF	2020-10-23	Commun Biol	www.ncbi.nlm.nih.gov/pubmed/33097823	The genetic architecture of appendicular lean mass characterized by association analysis in the UK Biobank study.	Appendicular lean mass	450,243 European ancestry individuals	NA	1p36.13	MFAP2	MFAP2			ENSG00000117122	NA	NA	rs2284747-T	rs2284747	0	2284747	intron_variant	0	0.5213	2e-16	15.699		0.0154	[0.012-0.019] unit increase	Affymetrix [18391927] (imputed)	N
8	rs9435672	1	17306675	rs2284746	2015-09-24	25282103	Wood AR	2014-10-05	Nat Genet	www.ncbi.nlm.nih.gov/pubmed/25282103	Defining the role of common variation in the genomic and biological architecture of adult human height.	Height	253,288 European ancestry individuals	80,067 European ancestry individuals	1p36.13	MFAP2	MFAP2			ENSG00000117122	NA	NA	rs2284746-C	rs2284746	0	2284746	intron_variant	0	0.475	1e-40	40		0.04	[0.034-0.046] unit decrease	Affymetrix, Illumina, Perlegen [2550858] (imputed)	N
8	rs9435672	1	17306675	rs2284746	2015-07-15	25429064	He M	2014-11-26	Hum Mol Genet	www.ncbi.nlm.nih.gov/pubmed/25429064	Meta-analysis of genome-wide association studies of adult height in East Asians identifies 17 novel loci.	Height	36,227 East Asian ancestry individuals	57,699 East Asian ancestry individuals	1p36.13	MFAP2	MFAP2			ENSG00000117122	NA	NA	rs2284746-C	rs2284746	0	2284746	intron_variant	0	0.72	2e-25	24.699		0.06	[0.046-0.074] unit decrease	Affymetrix, Illumina [2704730] (imputed)	N
8	rs9435672	1	17306675	rs2284746	2017-06-16	28166213	Wain LV	2017-02-06	Nat Genet	www.ncbi.nlm.nih.gov/pubmed/28166213	Genome-wide association analyses for lung function and chronic obstructive pulmonary disease identify new loci and potential druggable targets.	Lung function (FEV1/FVC)	48,943 European ancestry individuals	57,176 European ancestry individuals, 38,199 individuals.	1p36.13	MFAP2	MFAP2			ENSG00000117122	NA	NA	rs2284746-G	rs2284746	0	2284746	intron_variant	0	0.5218	1e-10	10		0.042	[0.028-0.056] unit decrease	Affymetrix [27624732] (imputed)	N
8	rs9435672	1	17306675	rs2284746	2019-05-21	30595370	Kichaev G	2018-12-27	Am J Hum Genet	www.ncbi.nlm.nih.gov/pubmed/30595370	Leveraging Polygenic Functional Enrichment to Improve GWAS Power.	Height	approximately 458,000 European ancestry individuals	NA	1p36.13		MFAP2			ENSG00000117122	NA	NA	rs2284746-?	rs2284746	0	2284746	intron_variant	0	NR	1e-131	131		NA		NR [~ 8900000] (imputed)	N
8	rs9435672	1	17306675	rs2284746	2011-10-16	21946350	Soler Artigas M	2011-09-25	Nat Genet	www.ncbi.nlm.nih.gov/pubmed/21946350	Genome-wide association and large-scale follow up identifies 16 new loci influencing lung function.	Pulmonary function	48,201 European ancestry individuals	46,411 European ancestry individuals	1p36.13	MFAP2	MFAP2			ENSG00000117122	NA	NA	rs2284746-G	rs2284746	0	2284746	intron_variant	0	0.52	8e-16	15.0969	(FEV1/FVC)	0.04	[0.030-0.050] unit decrease	Affymetrix, Illumina [~ 2500000] (imputed)	N
8	rs9435672	1	17306675	rs2284746	2013-09-12	23563607	Berndt SI	2013-04-07	Nat Genet	www.ncbi.nlm.nih.gov/pubmed/23563607	Genome-wide meta-analysis identifies 11 new loci for anthropometric traits and provides insights into genetic architecture.	Height	8,097 European ancestry tall individuals, 8,099 European ancestry short individuals	4,872 European ancestry tall individuals, 4,831 European ancestry short individuals	1p36.13	MFAP2	MFAP2			ENSG00000117122	NA	NA	rs2284746-G	rs2284746	0	2284746	intron_variant	0	0.52	5e-15	14.301		1.17	[NR]	Affymetrix, Illumina [~ 2800000] (imputed)	N
8	rs9435672	1	17306675	rs2284746	2013-02-27	23284291	Hancock DB	2012-12-20	PLoS Genet	www.ncbi.nlm.nih.gov/pubmed/23284291	Genome-wide joint meta-analysis of SNP and SNP-by-smoking interaction identifies novel loci for pulmonary function.	Pulmonary function (smoking interaction)	50,047 European ancestry individuals	NA	1p36.13	MFAP2	MFAP2			ENSG00000117122	NA	NA	rs2284746-?	rs2284746	0	2284746	intron_variant	0	NR	2e-11	10.699	(FEV1/FVC, Pack-years)	NA		NR [~ 2500000] (imputed)	N
8	rs9435672	1	17306675	rs2284746	2012-10-24	20881960	Lango Allen H	2010-09-29	Nature	www.ncbi.nlm.nih.gov/pubmed/20881960	Hundreds of variants clustered in genomic loci and biological pathways affect human height.	Height	133,653 European ancestry individuals	50,074 European ancestry individuals	1p36.13	MFAP2	MFAP2			ENSG00000117122	NA	NA	rs2284746-C	rs2284746	0	2284746	intron_variant	0	0.48	4e-29	28.3979		0.04	[NR] unit decrease	Affymetrix, Illumina [2834208] (imputed)	N
8	rs9435672	1	17306675	rs2284746	2019-07-02	31217584	Wojcik GL	2019-06-19	Nature	www.ncbi.nlm.nih.gov/pubmed/31217584	Genetic analyses of diverse populations improves discovery for complex traits.	Height	17,286 African American individuals, 22,192 Hispanic/Latino individuals, 4,680 Asian ancestry individuals, 3,939 Native Hawaiian ancestry individuals, 647 Native American ancestry individuals, 1,052 individuals	NA	1p36.13	NR	MFAP2			ENSG00000117122	NA	NA	rs2284746-?	rs2284746	0	2284746	intron_variant	0	NR	3e-13	12.5229		0.0445291	[0.033-0.056] unit increase	Illumina [34656550] (imputed)	N
8	rs9435672	1	17306675	rs2284746	2021-09-21	33230300	Surendran P	2020-11-23	Nat Genet	www.ncbi.nlm.nih.gov/pubmed/33230300	Discovery of rare variants associated with blood pressure regulation through meta-analysis of 1.3 million individuals.	Diastolic blood pressure	810,865 European ancestry individuals	354,096 European ancestry individuals	1p36.13		MFAP2			ENSG00000117122	NA	NA	rs2284746-C	rs2284746	0	2284746	intron_variant	0	0.4811	5e-09	8.30103		0.0768302	[0.05-0.104] mmHg decrease	Affymetrix, Illumina [242866] (imputed)	N
8	rs9435672	1	17306675	rs2284746	2022-04-26	35399580	Fernandez-Rhodes L	2022-03-11	HGG Adv	www.ncbi.nlm.nih.gov/pubmed/35399580	Ancestral diversity improves discovery and fine-mapping of genetic loci for anthropometric traits-The Hispanic/Latino Anthropometry Consortium.	Height	59,771 Hispanic or Latin American individuals	8,110 Hispanic or Latin American individuals	1p36.13		MFAP2			ENSG00000117122	NA	NA	rs2284746-C	rs2284746	0	2284746	intron_variant	0	0.5403	2e-09	8.69897		0.033	[0.022-0.044] unit decrease	Affymetrix, Illumina [8927938] (imputed)	N
8	rs9435672	1	17306870	rs55750792	2019-03-13	30664634	Rask-Andersen M	2019-01-21	Nat Commun	www.ncbi.nlm.nih.gov/pubmed/30664634	Genome-wide association study of body fat distribution identifies adiposity loci and sex-specific genetic effects.	Body fat distribution (leg fat ratio)	55,006 British ancestry males, 61,132 British ancestry females	112,425 British ancestry males, 133,936 British ancestry females	1p36.13	ATP13A2, MFAP2	MFAP2			ENSG00000117122	NA	NA	rs55750792-G	rs55750792	0	55750792	intron_variant	0	0.488723	3e-11	10.5229	(females)	0.01929	NR unit increase (replication)	Affymetrix [25472837] (imputed)	N
8	rs9435672	1	17306870	rs55750792	2019-03-13	30664634	Rask-Andersen M	2019-01-21	Nat Commun	www.ncbi.nlm.nih.gov/pubmed/30664634	Genome-wide association study of body fat distribution identifies adiposity loci and sex-specific genetic effects.	Body fat distribution (arm fat ratio)	55,006 British ancestry males, 61,132 British ancestry females	112,425 British ancestry males, 133,936 British ancestry females	1p36.13	ATP13A2, MFAP2	MFAP2			ENSG00000117122	NA	NA	rs55750792-G	rs55750792	0	55750792	intron_variant	0	0.488723	3e-08	7.52288	(females)	0.01883	NR unit increase (replication)	Affymetrix [25472837] (imputed)	N
8	rs9435672	1	17306870	rs55750792	2019-03-13	30664634	Rask-Andersen M	2019-01-21	Nat Commun	www.ncbi.nlm.nih.gov/pubmed/30664634	Genome-wide association study of body fat distribution identifies adiposity loci and sex-specific genetic effects.	Body fat distribution (trunk fat ratio)	55,006 British ancestry males, 61,132 British ancestry females	112,425 British ancestry males, 133,936 British ancestry females	1p36.13	ATP13A2, MFAP2	MFAP2			ENSG00000117122	NA	NA	rs55750792-G	rs55750792	0	55750792	intron_variant	0	0.488723	4e-16	15.3979		0.01781	NR unit decrease (replication)	Affymetrix [25472837] (imputed)	N
8	rs9435672	1	17306870	rs55750792	2019-03-13	30664634	Rask-Andersen M	2019-01-21	Nat Commun	www.ncbi.nlm.nih.gov/pubmed/30664634	Genome-wide association study of body fat distribution identifies adiposity loci and sex-specific genetic effects.	Body fat distribution (leg fat ratio)	55,006 British ancestry males, 61,132 British ancestry females	112,425 British ancestry males, 133,936 British ancestry females	1p36.13	ATP13A2, MFAP2	MFAP2			ENSG00000117122	NA	NA	rs55750792-G	rs55750792	0	55750792	intron_variant	0	0.488723	3e-10	9.52288		0.01266	NR unit increase (replication)	Affymetrix [25472837] (imputed)	N
8	rs9435672	1	17306870	rs55750792	2019-03-13	30664634	Rask-Andersen M	2019-01-21	Nat Commun	www.ncbi.nlm.nih.gov/pubmed/30664634	Genome-wide association study of body fat distribution identifies adiposity loci and sex-specific genetic effects.	Body fat distribution (trunk fat ratio)	55,006 British ancestry males, 61,132 British ancestry females	112,425 British ancestry males, 133,936 British ancestry females	1p36.13	ATP13A2, MFAP2	MFAP2			ENSG00000117122	NA	NA	rs55750792-G	rs55750792	0	55750792	intron_variant	0	0.488723	7e-19	18.1549	(females)	0.02722	NR unit decrease (replication)	Affymetrix [25472837] (imputed)	N
8	rs2311528	1	17306923	rs56265117	2021-08-24	34021172	Christakoudi S	2021-05-21	Sci Rep	www.ncbi.nlm.nih.gov/pubmed/34021172	GWAS of allometric body-shape indices in UK Biobank identifies loci suggesting associations with morphogenesis, organogenesis, adrenal cell renewal and cancer.	Waist circumference adjusted for body mass index	186,825 British ancestry men	NA	1p36.13	MFAP2, RP1-37C10.3	MFAP2			ENSG00000117122	NA	NA	rs56265117-T	rs56265117	0	56265117	intron_variant	0	NR	2e-18	17.699		0.0304562	[0.024-0.037] unit decrease	Affymetrix [321114] (imputed)	N
8	rs2311528	1	17306923	rs56265117	2022-08-05	35831902	Chiou JS	2022-07-13	BMC Med	www.ncbi.nlm.nih.gov/pubmed/35831902	Your height affects your health: genetic determinants and health-related outcomes in Taiwan.	Height	67,452 Han Chinese ancestry individuals	NA	1p36.13		MFAP2			ENSG00000117122	NA	NA	rs56265117-C	rs56265117	0	56265117	intron_variant	0	NR	5e-15	14.301		0.04	[0.03-0.05] unit increase	Affymetrix [NR] (imputed)	N
8	rs2311528	1	17306923	rs56265117	2021-08-24	34021172	Christakoudi S	2021-05-21	Sci Rep	www.ncbi.nlm.nih.gov/pubmed/34021172	GWAS of allometric body-shape indices in UK Biobank identifies loci suggesting associations with morphogenesis, organogenesis, adrenal cell renewal and cancer.	Hip circumference adjusted for BMI	186,825 British ancestry men	NA	1p36.13	MFAP2, RP1-37C10.3	MFAP2			ENSG00000117122	NA	NA	rs56265117-T	rs56265117	0	56265117	intron_variant	0	NR	3e-17	16.5229		0.0291403	[0.022-0.036] unit decrease	Affymetrix [323123] (imputed)	N
8	rs2311528	1	17306948	rs55779591	2021-08-24	34021172	Christakoudi S	2021-05-21	Sci Rep	www.ncbi.nlm.nih.gov/pubmed/34021172	GWAS of allometric body-shape indices in UK Biobank identifies loci suggesting associations with morphogenesis, organogenesis, adrenal cell renewal and cancer.	Waist-to-hip ratio adjusted for BMI	219,872 British ancestry women	NA	1p36.13	MFAP2, RP1-37C10.3	MFAP2			ENSG00000117122	NA	NA	rs55779591-T	rs55779591	0	55779591	intron_variant	0	NR	2e-08	7.69897		0.0170051	[0.011-0.023] unit decrease	Affymetrix [319769] (imputed)	N
8	rs2311528	1	17306948	rs55779591	2021-08-24	34021172	Christakoudi S	2021-05-21	Sci Rep	www.ncbi.nlm.nih.gov/pubmed/34021172	GWAS of allometric body-shape indices in UK Biobank identifies loci suggesting associations with morphogenesis, organogenesis, adrenal cell renewal and cancer.	Waist circumference adjusted for body mass index	219,872 British ancestry women	NA	1p36.13	MFAP2, RP1-37C10.3	MFAP2			ENSG00000117122	NA	NA	rs55779591-T	rs55779591	0	55779591	intron_variant	0	NR	3e-23	22.5229		0.0304513	[0.024-0.036] unit decrease	Affymetrix [321114] (imputed)	N
8	rs2311528	1	17306948	rs55779591	2021-08-24	34021172	Christakoudi S	2021-05-21	Sci Rep	www.ncbi.nlm.nih.gov/pubmed/34021172	GWAS of allometric body-shape indices in UK Biobank identifies loci suggesting associations with morphogenesis, organogenesis, adrenal cell renewal and cancer.	Waist-hip index	219,872 British ancestry women	NA	1p36.13	MFAP2, RP1-37C10.3	MFAP2			ENSG00000117122	NA	NA	rs55779591-T	rs55779591	0	55779591	intron_variant	0	NR	1e-09	9		0.0185015	[0.013-0.024] unit decrease	Affymetrix [319769] (imputed)	N
8	rs2311528	1	17308158	rs9435732	2017-08-10	28443625	Justice AE	2017-04-26	Nat Commun	www.ncbi.nlm.nih.gov/pubmed/28443625	Genome-wide meta-analysis of 241,258 adults accounting for smoking behaviour identifies novel loci for obesity traits.	Waist circumference adjusted for BMI (joint analysis main effects and smoking interaction)	97,400 European ancestry women, 63,892 European ancestry men, 5,829 European ancestry individuals, 10,500 African American/Afro-Caribbean ancestry women, 2,706 African American/Afro-Caribbean ancestry men, 1,030 Indian Asian ancestry women, 7,648 Indian Asian ancestry men, 1,793 Filipino ancestry women, 2,944 Hispanic/Latino ancestry women, 1,764 Hispanic/Latino ancestry men	21,496 European ancestry women, 24,385 European ancestry men, 118,364 European ancestry individuals, 2,326 African American/Afro-Caribbean ancestry women, 855 African American/Afro-Caribbean ancestry men	1p36.13	MFAP2	MFAP2 - ATP13A2	ENSG00000117122	ENSG00000159363		1031	4295	rs9435732-T	rs9435732	0	9435732	intron_variant	1	0.2658	3e-19	18.5229		NA		Affymetrix, Illumina, Perlegen [up to 2800000] (imputed)	N
8	rs2311528	1	17308158	rs9435732	2017-08-10	28443625	Justice AE	2017-04-26	Nat Commun	www.ncbi.nlm.nih.gov/pubmed/28443625	Genome-wide meta-analysis of 241,258 adults accounting for smoking behaviour identifies novel loci for obesity traits.	Waist circumference adjusted for BMI (joint analysis main effects and smoking interaction)	97,400 European ancestry women, 63,892 European ancestry men, 5,829 European ancestry individuals, 10,500 African American/Afro-Caribbean ancestry women, 2,706 African American/Afro-Caribbean ancestry men, 1,030 Indian Asian ancestry women, 7,648 Indian Asian ancestry men, 1,793 Filipino ancestry women, 2,944 Hispanic/Latino ancestry women, 1,764 Hispanic/Latino ancestry men	21,496 European ancestry women, 24,385 European ancestry men, 118,364 European ancestry individuals, 2,326 African American/Afro-Caribbean ancestry women, 855 African American/Afro-Caribbean ancestry men	1p36.13	MFAP2	MFAP2 - ATP13A2	ENSG00000117122	ENSG00000159363		1031	4295	rs9435732-T	rs9435732	0	9435732	intron_variant	1	0.2658	2e-12	11.699	(men)	NA		Affymetrix, Illumina, Perlegen [up to 2800000] (imputed)	N
8	rs2311528	1	17308158	rs9435732	2017-08-10	28443625	Justice AE	2017-04-26	Nat Commun	www.ncbi.nlm.nih.gov/pubmed/28443625	Genome-wide meta-analysis of 241,258 adults accounting for smoking behaviour identifies novel loci for obesity traits.	Waist circumference adjusted for BMI (joint analysis main effects and smoking interaction)	97,400 European ancestry women, 63,892 European ancestry men, 5,829 European ancestry individuals, 10,500 African American/Afro-Caribbean ancestry women, 2,706 African American/Afro-Caribbean ancestry men, 1,030 Indian Asian ancestry women, 7,648 Indian Asian ancestry men, 1,793 Filipino ancestry women, 2,944 Hispanic/Latino ancestry women, 1,764 Hispanic/Latino ancestry men	21,496 European ancestry women, 24,385 European ancestry men, 118,364 European ancestry individuals, 2,326 African American/Afro-Caribbean ancestry women, 855 African American/Afro-Caribbean ancestry men	1p36.13	MFAP2	MFAP2 - ATP13A2	ENSG00000117122	ENSG00000159363		1031	4295	rs9435732-T	rs9435732	0	9435732	intron_variant	1	0.2658	1e-08	8	(women)	NA		Affymetrix, Illumina, Perlegen [up to 2800000] (imputed)	N
8	rs2311528	1	17308158	rs9435732	2017-08-10	28443625	Justice AE	2017-04-26	Nat Commun	www.ncbi.nlm.nih.gov/pubmed/28443625	Genome-wide meta-analysis of 241,258 adults accounting for smoking behaviour identifies novel loci for obesity traits.	Waist circumference adjusted for BMI (adjusted for smoking behaviour)	97,400 European ancestry women, 63,892 European ancestry men, 5,829 European ancestry individuals, 10,500 African American/Afro-Caribbean ancestry women, 2,706 African American/Afro-Caribbean ancestry men, 1,030 Indian Asian ancestry women, 7,648 Indian Asian ancestry men, 1,793 Filipino ancestry women, 2,944 Hispanic/Latino ancestry women, 1,764 Hispanic/Latino ancestry men	21,496 European ancestry women, 24,385 European ancestry men, 118,364 European ancestry individuals, 2,326 African American/Afro-Caribbean ancestry women, 855 African American/Afro-Caribbean ancestry men	1p36.13	MFAP2	MFAP2 - ATP13A2	ENSG00000117122	ENSG00000159363		1031	4295	rs9435732-T	rs9435732	0	9435732	intron_variant	1	0.2658	3e-16	15.5229		0.0318	[0.024-0.039] unit decrease	Affymetrix, Illumina, Perlegen [up to 2800000] (imputed)	N
8	rs2311528	1	17308158	rs9435732	2017-08-10	28443625	Justice AE	2017-04-26	Nat Commun	www.ncbi.nlm.nih.gov/pubmed/28443625	Genome-wide meta-analysis of 241,258 adults accounting for smoking behaviour identifies novel loci for obesity traits.	Waist circumference adjusted for BMI (adjusted for smoking behaviour)	97,400 European ancestry women, 63,892 European ancestry men, 5,829 European ancestry individuals, 10,500 African American/Afro-Caribbean ancestry women, 2,706 African American/Afro-Caribbean ancestry men, 1,030 Indian Asian ancestry women, 7,648 Indian Asian ancestry men, 1,793 Filipino ancestry women, 2,944 Hispanic/Latino ancestry women, 1,764 Hispanic/Latino ancestry men	21,496 European ancestry women, 24,385 European ancestry men, 118,364 European ancestry individuals, 2,326 African American/Afro-Caribbean ancestry women, 855 African American/Afro-Caribbean ancestry men	1p36.13	MFAP2	MFAP2 - ATP13A2	ENSG00000117122	ENSG00000159363		1031	4295	rs9435732-T	rs9435732	0	9435732	intron_variant	1	0.2658	5e-08	7.30103	(women)	0.027	[0.017-0.037] unit decrease	Affymetrix, Illumina, Perlegen [up to 2800000] (imputed)	N
8	rs2311528	1	17308158	rs9435732	2017-08-10	28443625	Justice AE	2017-04-26	Nat Commun	www.ncbi.nlm.nih.gov/pubmed/28443625	Genome-wide meta-analysis of 241,258 adults accounting for smoking behaviour identifies novel loci for obesity traits.	Waist circumference adjusted for BMI (adjusted for smoking behaviour)	97,400 European ancestry women, 63,892 European ancestry men, 5,829 European ancestry individuals, 10,500 African American/Afro-Caribbean ancestry women, 2,706 African American/Afro-Caribbean ancestry men, 1,030 Indian Asian ancestry women, 7,648 Indian Asian ancestry men, 1,793 Filipino ancestry women, 2,944 Hispanic/Latino ancestry women, 1,764 Hispanic/Latino ancestry men	21,496 European ancestry women, 24,385 European ancestry men, 118,364 European ancestry individuals, 2,326 African American/Afro-Caribbean ancestry women, 855 African American/Afro-Caribbean ancestry men	1p36.13	MFAP2	MFAP2 - ATP13A2	ENSG00000117122	ENSG00000159363		1031	4295	rs9435732-T	rs9435732	0	9435732	intron_variant	1	0.2658	1e-11	11	(men)	0.038	[0.027-0.049] unit decrease	Affymetrix, Illumina, Perlegen [up to 2800000] (imputed)	N
8	rs2311528	1	17308158	rs9435732	2017-05-23	25673412	Shungin D	2015-02-12	Nature	www.ncbi.nlm.nih.gov/pubmed/25673412	New genetic loci link adipose and insulin biology to body fat distribution.	Waist circumference adjusted for body mass index	up to 56,910 European ancestry men, up to 86,570 European ancestry women	up to 36,570 European ancestry men, 30,172 European ancestry women, 915 Filipino ancestry men, 735 Filipino ancestry women, 2,351 African American/Afro-Caribbean ancestry men, 6,258 African American/Afro-Caribbean ancestry women, 2,285 South Asian ancestry men, 506 South Asian ancestry women, 195 Seychellois ancestry men, 266 Seychellois ancestry women	1p36.13	MFAP2	MFAP2 - ATP13A2	ENSG00000117122	ENSG00000159363		1031	4295	rs9435732-T	rs9435732	0	9435732	intron_variant	1	0.2715	4e-16	15.3979	(EA)	0.0309	[0.023-0.038] unit decrease	Affymetrix, Illumina, Perlegen [up to 2542447] (imputed)	N
8	rs2311528	1	17308158	rs9435732	2017-05-23	25673412	Shungin D	2015-02-12	Nature	www.ncbi.nlm.nih.gov/pubmed/25673412	New genetic loci link adipose and insulin biology to body fat distribution.	Waist circumference adjusted for body mass index	up to 56,910 European ancestry men, up to 86,570 European ancestry women	up to 36,570 European ancestry men, 30,172 European ancestry women, 915 Filipino ancestry men, 735 Filipino ancestry women, 2,351 African American/Afro-Caribbean ancestry men, 6,258 African American/Afro-Caribbean ancestry women, 2,285 South Asian ancestry men, 506 South Asian ancestry women, 195 Seychellois ancestry men, 266 Seychellois ancestry women	1p36.13	MFAP2	MFAP2 - ATP13A2	ENSG00000117122	ENSG00000159363		1031	4295	rs9435732-T	rs9435732	0	9435732	intron_variant	1	0.2715	3e-08	7.52288	(EA,women)	0.0272	[0.018-0.037] unit decrease	Affymetrix, Illumina, Perlegen [up to 2542447] (imputed)	N
8	rs2311528	1	17308158	rs9435732	2017-05-23	25673412	Shungin D	2015-02-12	Nature	www.ncbi.nlm.nih.gov/pubmed/25673412	New genetic loci link adipose and insulin biology to body fat distribution.	Waist circumference adjusted for body mass index	up to 56,910 European ancestry men, up to 86,570 European ancestry women	up to 36,570 European ancestry men, 30,172 European ancestry women, 915 Filipino ancestry men, 735 Filipino ancestry women, 2,351 African American/Afro-Caribbean ancestry men, 6,258 African American/Afro-Caribbean ancestry women, 2,285 South Asian ancestry men, 506 South Asian ancestry women, 195 Seychellois ancestry men, 266 Seychellois ancestry women	1p36.13	MFAP2	MFAP2 - ATP13A2	ENSG00000117122	ENSG00000159363		1031	4295	rs9435732-T	rs9435732	0	9435732	intron_variant	1	0.2715	9e-12	11.0458	(EA, men)	0.0365	[0.026-0.047] unit decrease	Affymetrix, Illumina, Perlegen [up to 2542447] (imputed)	N
8	rs2311528	1	17308158	rs9435732	2020-04-17	31669095	Zhu Z	2019-10-24	J Allergy Clin Immunol	www.ncbi.nlm.nih.gov/pubmed/31669095	Shared Genetic and Experimental Links between Obesity-Related Traits and Asthma Subtypes in UK Biobank.	Waist-to-hip ratio adjusted for BMI	457,690 European ancestry individuals	NA	1p36.13	NR	MFAP2 - ATP13A2	ENSG00000117122	ENSG00000159363		1031	4295	rs9435732-?	rs9435732	0	9435732	intron_variant	1	NR	5e-10	9.30103		NA		Affymetrix [~ 8270000] (imputed)	N
8	rs2311528	1	17308158	rs9435732	2017-08-10	28443625	Justice AE	2017-04-26	Nat Commun	www.ncbi.nlm.nih.gov/pubmed/28443625	Genome-wide meta-analysis of 241,258 adults accounting for smoking behaviour identifies novel loci for obesity traits.	Waist circumference adjusted for BMI in non-smokers	77,113 European ancestry women, 47,319 European ancestry men, 4,856 European ancestry individuals, 8,799 African American/Afro-Caribbean ancestry women, 1,803 African American/Afro-Caribbean ancestry men, 1,020 Indian Asian ancestry women, 6,691 Indian Asian ancestry men, 1,526 Filipino ancestry women, 2,469 Hispanic/Latino ancestry women, 1,318 Hispanic/Latino ancestry men	16,011 European ancestry women, 17,912 European ancestry men, 105,218 European ancestry individuals, 2,073 African American/Afro-Caribbean ancestry women, 647 African American/Afro-Caribbean ancestry men	1p36.13	MFAP2	MFAP2 - ATP13A2	ENSG00000117122	ENSG00000159363		1031	4295	rs9435732-T	rs9435732	0	9435732	intron_variant	1	0.2658	3e-09	8.52288	(men)	0.0385	[0.026-0.051] unit decrease	Affymetrix, Illumina, Perlegen [up to 2800000] (imputed)	N
8	rs2311528	1	17308158	rs9435732	2017-08-18	28448500	Graff M	2017-04-27	PLoS Genet	www.ncbi.nlm.nih.gov/pubmed/28448500	Genome-wide physical activity interactions in adiposity - A meta-analysis of 200,452 adults.	Waist circumference adjusted for body mass index	2,518 African American women, 85,730 European ancestry women, 1,773 Filipino ancestry women, 1,030 Indian ancestry women, 1,457 African American men, 54,792 European ancestry men, 7,648 Indian ancestry men, 5,527 European ancestry individuals	6,244 African American women, 17,531 European ancestry women, 329 African American men, 19,956 European ancestry men	1p36.13	MFAP2	MFAP2 - ATP13A2	ENSG00000117122	ENSG00000159363		1031	4295	rs9435732-C	rs9435732	0	9435732	intron_variant	1	0.7301	3e-11	10.5229	(men)	0.0391	[0.028-0.051] cm increase	Affymetrix, Illumina, Perlegen [~ 2500000] (imputed)	N
8	rs2311528	1	17308158	rs9435732	2017-08-18	28448500	Graff M	2017-04-27	PLoS Genet	www.ncbi.nlm.nih.gov/pubmed/28448500	Genome-wide physical activity interactions in adiposity - A meta-analysis of 200,452 adults.	Waist circumference adjusted for body mass index	2,518 African American women, 85,730 European ancestry women, 1,773 Filipino ancestry women, 1,030 Indian ancestry women, 1,457 African American men, 54,792 European ancestry men, 7,648 Indian ancestry men, 5,527 European ancestry individuals	6,244 African American women, 17,531 European ancestry women, 329 African American men, 19,956 European ancestry men	1p36.13	MFAP2	MFAP2 - ATP13A2	ENSG00000117122	ENSG00000159363		1031	4295	rs9435732-C	rs9435732	0	9435732	intron_variant	1	0.7301	7e-10	9.1549	(women)	0.0357	[0.024-0.047] cm increase	Affymetrix, Illumina, Perlegen [~ 2500000] (imputed)	N
8	rs2311528	1	17308158	rs9435732	2017-08-18	28448500	Graff M	2017-04-27	PLoS Genet	www.ncbi.nlm.nih.gov/pubmed/28448500	Genome-wide physical activity interactions in adiposity - A meta-analysis of 200,452 adults.	Waist circumference adjusted for body mass index	2,518 African American women, 85,730 European ancestry women, 1,773 Filipino ancestry women, 1,030 Indian ancestry women, 1,457 African American men, 54,792 European ancestry men, 7,648 Indian ancestry men, 5,527 European ancestry individuals	6,244 African American women, 17,531 European ancestry women, 329 African American men, 19,956 European ancestry men	1p36.13	MFAP2	MFAP2 - ATP13A2	ENSG00000117122	ENSG00000159363		1031	4295	rs9435732-C	rs9435732	0	9435732	intron_variant	1	0.7313	8e-13	12.0969	(EA)	0.0303	[0.022-0.039] cm increase	Affymetrix, Illumina, Perlegen [~ 2500000] (imputed)	N
8	rs2311528	1	17308158	rs9435732	2017-08-18	28448500	Graff M	2017-04-27	PLoS Genet	www.ncbi.nlm.nih.gov/pubmed/28448500	Genome-wide physical activity interactions in adiposity - A meta-analysis of 200,452 adults.	Waist circumference adjusted for BMI in active individuals	1,957 African American women, 1,773 Filipino ancestry women, 305 Indian ancestry women, 67,139 European ancestry women, 1,206 African American men, 2,029 Indian ancestry men, 43,100 European ancestry men, at least 4,819 European ancestry individuals	4,807 African American women, 12,347 European ancestry women, 265 African American men, 14,540 European ancestry men	1p36.13	MFAP2	MFAP2 - ATP13A2	ENSG00000117122	ENSG00000159363		1031	4295	rs9435732-C	rs9435732	0	9435732	intron_variant	1	0.7266	4e-10	9.39794	(EA, men)	0.0431	[0.03-0.057] cm increase	Affymetrix, Illumina, Perlegen [~ 2500000] (imputed)	N
8	rs2311528	1	17308158	rs9435732	2017-08-18	28448500	Graff M	2017-04-27	PLoS Genet	www.ncbi.nlm.nih.gov/pubmed/28448500	Genome-wide physical activity interactions in adiposity - A meta-analysis of 200,452 adults.	Waist circumference adjusted for BMI in active individuals	1,957 African American women, 1,773 Filipino ancestry women, 305 Indian ancestry women, 67,139 European ancestry women, 1,206 African American men, 2,029 Indian ancestry men, 43,100 European ancestry men, at least 4,819 European ancestry individuals	4,807 African American women, 12,347 European ancestry women, 265 African American men, 14,540 European ancestry men	1p36.13	MFAP2	MFAP2 - ATP13A2	ENSG00000117122	ENSG00000159363		1031	4295	rs9435732-C	rs9435732	0	9435732	intron_variant	1	0.7351	8e-06	5.09691	(EA,women)	0.0276	[0.015-0.04] cm increase	Affymetrix, Illumina, Perlegen [~ 2500000] (imputed)	N
8	rs2311528	1	17308158	rs9435732	2017-08-18	28448500	Graff M	2017-04-27	PLoS Genet	www.ncbi.nlm.nih.gov/pubmed/28448500	Genome-wide physical activity interactions in adiposity - A meta-analysis of 200,452 adults.	Waist circumference adjusted for BMI in active individuals	1,957 African American women, 1,773 Filipino ancestry women, 305 Indian ancestry women, 67,139 European ancestry women, 1,206 African American men, 2,029 Indian ancestry men, 43,100 European ancestry men, at least 4,819 European ancestry individuals	4,807 African American women, 12,347 European ancestry women, 265 African American men, 14,540 European ancestry men	1p36.13	MFAP2	MFAP2 - ATP13A2	ENSG00000117122	ENSG00000159363		1031	4295	rs9435732-C	rs9435732	0	9435732	intron_variant	1	0.7313	2e-12	11.699	(EA)	0.0336	[0.024-0.043] cm increase	Affymetrix, Illumina, Perlegen [~ 2500000] (imputed)	N
8	rs2311528	1	17308158	rs9435732	2017-08-18	28448500	Graff M	2017-04-27	PLoS Genet	www.ncbi.nlm.nih.gov/pubmed/28448500	Genome-wide physical activity interactions in adiposity - A meta-analysis of 200,452 adults.	Waist circumference adjusted for BMI in active individuals	1,957 African American women, 1,773 Filipino ancestry women, 305 Indian ancestry women, 67,139 European ancestry women, 1,206 African American men, 2,029 Indian ancestry men, 43,100 European ancestry men, at least 4,819 European ancestry individuals	4,807 African American women, 12,347 European ancestry women, 265 African American men, 14,540 European ancestry men	1p36.13	MFAP2	MFAP2 - ATP13A2	ENSG00000117122	ENSG00000159363		1031	4295	rs9435732-C	rs9435732	0	9435732	intron_variant	1	0.7293	2e-10	9.69897	(men)	0.0429	[0.03-0.056] cm increase	Affymetrix, Illumina, Perlegen [~ 2500000] (imputed)	N
8	rs2311528	1	17308158	rs9435732	2017-08-18	28448500	Graff M	2017-04-27	PLoS Genet	www.ncbi.nlm.nih.gov/pubmed/28448500	Genome-wide physical activity interactions in adiposity - A meta-analysis of 200,452 adults.	Waist circumference adjusted for BMI in active individuals	1,957 African American women, 1,773 Filipino ancestry women, 305 Indian ancestry women, 67,139 European ancestry women, 1,206 African American men, 2,029 Indian ancestry men, 43,100 European ancestry men, at least 4,819 European ancestry individuals	4,807 African American women, 12,347 European ancestry women, 265 African American men, 14,540 European ancestry men	1p36.13	MFAP2	MFAP2 - ATP13A2	ENSG00000117122	ENSG00000159363		1031	4295	rs9435732-C	rs9435732	0	9435732	intron_variant	1	0.7301	2e-12	11.699		0.0324	[0.023-0.041] cm increase	Affymetrix, Illumina, Perlegen [~ 2500000] (imputed)	N
8	rs2311528	1	17308158	rs9435732	2017-08-18	28448500	Graff M	2017-04-27	PLoS Genet	www.ncbi.nlm.nih.gov/pubmed/28448500	Genome-wide physical activity interactions in adiposity - A meta-analysis of 200,452 adults.	Waist circumference adjusted for BMI (joint analysis main effects and physical activity interaction)	2,518 African American women, 85,730 European ancestry women, 1,773 Filipino ancestry women, 1,030 Indian ancestry women, 1,457 African American men, 54,792 European ancestry men, 7,648 Indian ancestry men, 5,527 European ancestry individuals	6,244 African American women, 17,531 European ancestry women, 329 African American men, 19,956 European ancestry men	1p36.13	MFAP2	MFAP2 - ATP13A2	ENSG00000117122	ENSG00000159363		1031	4295	rs9435732-?	rs9435732	0	9435732	intron_variant	1	0.7313	2e-10	9.69897	(EA, men)	NA		Affymetrix, Illumina, Perlegen [~ 2500000] (imputed)	N
8	rs2311528	1	17308158	rs9435732	2017-08-18	28448500	Graff M	2017-04-27	PLoS Genet	www.ncbi.nlm.nih.gov/pubmed/28448500	Genome-wide physical activity interactions in adiposity - A meta-analysis of 200,452 adults.	Waist circumference adjusted for BMI (joint analysis main effects and physical activity interaction)	2,518 African American women, 85,730 European ancestry women, 1,773 Filipino ancestry women, 1,030 Indian ancestry women, 1,457 African American men, 54,792 European ancestry men, 7,648 Indian ancestry men, 5,527 European ancestry individuals	6,244 African American women, 17,531 European ancestry women, 329 African American men, 19,956 European ancestry men	1p36.13	MFAP2	MFAP2 - ATP13A2	ENSG00000117122	ENSG00000159363		1031	4295	rs9435732-?	rs9435732	0	9435732	intron_variant	1	0.7301	3e-14	13.5229		NA		Affymetrix, Illumina, Perlegen [~ 2500000] (imputed)	N
8	rs2311528	1	17308158	rs9435732	2017-08-18	28448500	Graff M	2017-04-27	PLoS Genet	www.ncbi.nlm.nih.gov/pubmed/28448500	Genome-wide physical activity interactions in adiposity - A meta-analysis of 200,452 adults.	Waist circumference adjusted for BMI (joint analysis main effects and physical activity interaction)	2,518 African American women, 85,730 European ancestry women, 1,773 Filipino ancestry women, 1,030 Indian ancestry women, 1,457 African American men, 54,792 European ancestry men, 7,648 Indian ancestry men, 5,527 European ancestry individuals	6,244 African American women, 17,531 European ancestry women, 329 African American men, 19,956 European ancestry men	1p36.13	MFAP2	MFAP2 - ATP13A2	ENSG00000117122	ENSG00000159363		1031	4295	rs9435732-?	rs9435732	0	9435732	intron_variant	1	0.7313	6e-06	5.22185	(EA, women)	NA		Affymetrix, Illumina, Perlegen [~ 2500000] (imputed)	N
8	rs2311528	1	17308158	rs9435732	2017-08-18	28448500	Graff M	2017-04-27	PLoS Genet	www.ncbi.nlm.nih.gov/pubmed/28448500	Genome-wide physical activity interactions in adiposity - A meta-analysis of 200,452 adults.	Waist circumference adjusted for BMI (joint analysis main effects and physical activity interaction)	2,518 African American women, 85,730 European ancestry women, 1,773 Filipino ancestry women, 1,030 Indian ancestry women, 1,457 African American men, 54,792 European ancestry men, 7,648 Indian ancestry men, 5,527 European ancestry individuals	6,244 African American women, 17,531 European ancestry women, 329 African American men, 19,956 European ancestry men	1p36.13	MFAP2	MFAP2 - ATP13A2	ENSG00000117122	ENSG00000159363		1031	4295	rs9435732-?	rs9435732	0	9435732	intron_variant	1	0.7313	2e-13	12.699	(EA)	NA		Affymetrix, Illumina, Perlegen [~ 2500000] (imputed)	N
8	rs2311528	1	17308158	rs9435732	2017-08-18	28448500	Graff M	2017-04-27	PLoS Genet	www.ncbi.nlm.nih.gov/pubmed/28448500	Genome-wide physical activity interactions in adiposity - A meta-analysis of 200,452 adults.	Waist circumference adjusted for BMI (joint analysis main effects and physical activity interaction)	2,518 African American women, 85,730 European ancestry women, 1,773 Filipino ancestry women, 1,030 Indian ancestry women, 1,457 African American men, 54,792 European ancestry men, 7,648 Indian ancestry men, 5,527 European ancestry individuals	6,244 African American women, 17,531 European ancestry women, 329 African American men, 19,956 European ancestry men	1p36.13	MFAP2	MFAP2 - ATP13A2	ENSG00000117122	ENSG00000159363		1031	4295	rs9435732-?	rs9435732	0	9435732	intron_variant	1	0.7301	1e-11	11	(men)	NA		Affymetrix, Illumina, Perlegen [~ 2500000] (imputed)	N
8	rs2311528	1	17308158	rs9435732	2017-08-18	28448500	Graff M	2017-04-27	PLoS Genet	www.ncbi.nlm.nih.gov/pubmed/28448500	Genome-wide physical activity interactions in adiposity - A meta-analysis of 200,452 adults.	Waist circumference adjusted for body mass index	2,518 African American women, 85,730 European ancestry women, 1,773 Filipino ancestry women, 1,030 Indian ancestry women, 1,457 African American men, 54,792 European ancestry men, 7,648 Indian ancestry men, 5,527 European ancestry individuals	6,244 African American women, 17,531 European ancestry women, 329 African American men, 19,956 European ancestry men	1p36.13	MFAP2	MFAP2 - ATP13A2	ENSG00000117122	ENSG00000159363		1031	4295	rs9435732-C	rs9435732	0	9435732	intron_variant	1	0.7313	4e-10	9.39794	(EA, men)	0.039	[0.027-0.051] cm increase	Affymetrix, Illumina, Perlegen [~ 2500000] (imputed)	N
8	rs2311528	1	17308158	rs9435732	2017-08-10	28443625	Justice AE	2017-04-26	Nat Commun	www.ncbi.nlm.nih.gov/pubmed/28443625	Genome-wide meta-analysis of 241,258 adults accounting for smoking behaviour identifies novel loci for obesity traits.	Waist circumference adjusted for BMI in smokers	19,276 European ancestry women, 16,408 European ancestry men, 973 European ancestry individuals, 1,701 African American/Afro-Caribbean ancestry women, 903 African American/Afro-Caribbean ancestry men, 10 Indian Asian ancestry women, 957 Indian Asian ancestry men, 267 Filipino ancestry women, 475 Hispanic/Latino ancestry women, 446 Hispanic/Latino ancestry men	5,485 European ancestry women, 6,471 European ancestry men, 13,416 European ancestry individuals, 253 African American/Afro-Caribbean ancestry women, 208 African American/Afro-Caribbean ancestry men	1p36.13	MFAP2	MFAP2 - ATP13A2	ENSG00000117122	ENSG00000159363		1031	4295	rs9435732-T	rs9435732	0	9435732	intron_variant	1	0.2658	1e-09	9		0.0496	[0.034-0.066] unit decrease	Affymetrix, Illumina, Perlegen [up to 2800000] (imputed)	N
8	rs2311528	1	17308158	rs9435732	2017-08-18	28448500	Graff M	2017-04-27	PLoS Genet	www.ncbi.nlm.nih.gov/pubmed/28448500	Genome-wide physical activity interactions in adiposity - A meta-analysis of 200,452 adults.	Waist circumference adjusted for body mass index	2,518 African American women, 85,730 European ancestry women, 1,773 Filipino ancestry women, 1,030 Indian ancestry women, 1,457 African American men, 54,792 European ancestry men, 7,648 Indian ancestry men, 5,527 European ancestry individuals	6,244 African American women, 17,531 European ancestry women, 329 African American men, 19,956 European ancestry men	1p36.13	MFAP2	MFAP2 - ATP13A2	ENSG00000117122	ENSG00000159363		1031	4295	rs9435732-C	rs9435732	0	9435732	intron_variant	1	0.7301	7e-14	13.1549		0.0297	[0.022-0.038] cm increase	Affymetrix, Illumina, Perlegen [~ 2500000] (imputed)	N
8	rs2311528	1	17308158	rs9435732	2017-08-10	28443625	Justice AE	2017-04-26	Nat Commun	www.ncbi.nlm.nih.gov/pubmed/28443625	Genome-wide meta-analysis of 241,258 adults accounting for smoking behaviour identifies novel loci for obesity traits.	Waist circumference adjusted for BMI in non-smokers	77,113 European ancestry women, 47,319 European ancestry men, 4,856 European ancestry individuals, 8,799 African American/Afro-Caribbean ancestry women, 1,803 African American/Afro-Caribbean ancestry men, 1,020 Indian Asian ancestry women, 6,691 Indian Asian ancestry men, 1,526 Filipino ancestry women, 2,469 Hispanic/Latino ancestry women, 1,318 Hispanic/Latino ancestry men	16,011 European ancestry women, 17,912 European ancestry men, 105,218 European ancestry individuals, 2,073 African American/Afro-Caribbean ancestry women, 647 African American/Afro-Caribbean ancestry men	1p36.13	MFAP2	MFAP2 - ATP13A2	ENSG00000117122	ENSG00000159363		1031	4295	rs9435732-T	rs9435732	0	9435732	intron_variant	1	0.2658	4e-12	11.3979		0.0301	[0.022-0.039] unit decrease	Affymetrix, Illumina, Perlegen [up to 2800000] (imputed)	N
8	rs2311528	1	17308158	rs9435732	2020-04-17	31669095	Zhu Z	2019-10-24	J Allergy Clin Immunol	www.ncbi.nlm.nih.gov/pubmed/31669095	Shared Genetic and Experimental Links between Obesity-Related Traits and Asthma Subtypes in UK Biobank.	Waist circumference adjusted for body mass index	457,690 European ancestry individuals	NA	1p36.13	NR	MFAP2 - ATP13A2	ENSG00000117122	ENSG00000159363		1031	4295	rs9435732-?	rs9435732	0	9435732	intron_variant	1	NR	3e-46	45.5229		NA		Affymetrix [~ 8270000] (imputed)	N
8	rs2311528	1	17308158	rs9435732	2019-02-08	30595370	Kichaev G	2018-12-27	Am J Hum Genet	www.ncbi.nlm.nih.gov/pubmed/30595370	Leveraging Polygenic Functional Enrichment to Improve GWAS Power.	Waist-hip ratio	approximately 458,000 European ancestry individuals	NA	1p36.13		MFAP2 - ATP13A2	ENSG00000117122	ENSG00000159363		1031	4295	rs9435732-?	rs9435732	0	9435732	intron_variant	1	NR	2e-10	9.69897		NA		NR [~ 8900000] (imputed)	N
8	rs9435672	1	17308254	rs9435733	2019-07-17	28552196	Tachmazidou I	2017-06-01	Am J Hum Genet	www.ncbi.nlm.nih.gov/pubmed/28552196	Whole-Genome Sequencing Coupled to Imputation Discovers Genetic Signals for Anthropometric Traits.	Height	1,249 whole genome sequenced European ancestry individuals, 3,541 whole genome sequenced individuals, 46,910 European ancestry individuals, 471 Carlantino (founder/genetic isolate) individuals, 1,197 Friuli Venezia Giulia (founder/genetic isolate) individuals, 1,043 Mylopotamos (founder/genetic isolate) individuals, 933 Pomak (founder/genetic isolate) individuals, 1,785 Val Borbera (founder/genet…	205,003 European ancestry individuals	1p36.13	RP1-37C10.3	MFAP2 - ATP13A2	ENSG00000117122	ENSG00000159363		1127	4199	rs9435733-T	rs9435733	0	9435733	intron_variant	1	0.4784	2e-11	10.699		0.0426	[0.03-0.055] unit decrease	Affymetrix, Illumina, Perlegen [15844966] (imputed)	N
8	rs9435672	1	17308254	rs9435733	2019-03-27	30804560	Shrine N	2019-02-25	Nat Genet	www.ncbi.nlm.nih.gov/pubmed/30804560	New genetic signals for lung function highlight pathways and chronic obstructive pulmonary disease associations across multiple ancestries.	Lung function (FEV1/FVC)	321,047 European ancestry individuals	79,005 European ancestry individuals	1p36.13	MFAP2	MFAP2 - ATP13A2	ENSG00000117122	ENSG00000159363		1127	4199	rs9435733-T	rs9435733	0	9435733	intron_variant	1	0.4817	6e-61	60.2218		0.0389	[0.034-0.044] unit increase	Affymetrix [19819130] (imputed)	N
8	rs9435672	1	17308254	rs9435733	2019-03-27	30804560	Shrine N	2019-02-25	Nat Genet	www.ncbi.nlm.nih.gov/pubmed/30804560	New genetic signals for lung function highlight pathways and chronic obstructive pulmonary disease associations across multiple ancestries.	Lung function (FVC)	321,047 European ancestry individuals	79,005 European ancestry individuals	1p36.13	MFAP2	MFAP2 - ATP13A2	ENSG00000117122	ENSG00000159363		1127	4199	rs9435733-T	rs9435733	0	9435733	intron_variant	1	0.4817	3e-23	22.5229		0.0231	[0.019-0.028] unit decrease	Affymetrix [19819130] (imputed)	N
8	rs9435672	1	17308254	rs9435733	2019-03-27	30804560	Shrine N	2019-02-25	Nat Genet	www.ncbi.nlm.nih.gov/pubmed/30804560	New genetic signals for lung function highlight pathways and chronic obstructive pulmonary disease associations across multiple ancestries.	Peak expiratory flow	321,047 European ancestry individuals	24,218 European ancestry individuals	1p36.13	MFAP2	MFAP2 - ATP13A2	ENSG00000117122	ENSG00000159363		1127	4199	rs9435733-T	rs9435733	0	9435733	intron_variant	1	0.4817	4e-20	19.3979		0.0231	[0.018-0.028] unit increase	Affymetrix [19819130] (imputed)	N
8	rs9435672	1	17309718	rs3754512	2019-02-08	30595370	Kichaev G	2018-12-27	Am J Hum Genet	www.ncbi.nlm.nih.gov/pubmed/30595370	Leveraging Polygenic Functional Enrichment to Improve GWAS Power.	Lung function (FEV1/FVC)	approximately 370,000 European ancestry individuals	NA	1p36.13		MFAP2 - ATP13A2	ENSG00000117122	ENSG00000159363		2591	2735	rs3754512-?	rs3754512	0	3754512	intron_variant	1	NR	7e-76	75.1549		NA		NR [~ 8900000] (imputed)	N
8	rs9435672	1	17311190	rs9435734	2022-08-04	35505052	Fan CC	2022-05-03	Nat Commun	www.ncbi.nlm.nih.gov/pubmed/35505052	Multivariate genome-wide association study on tissue-sensitive diffusion metrics highlights pathways that shape the human brain.	Whole brain free water diffusion (multivariate analysis)	23,543 European ancestry individuals	11,555 European ancestry individuals, 3,030 non-European ancestry individuals	1p36.13		MFAP2 - ATP13A2	ENSG00000117122	ENSG00000159363		4063	1263	rs9435734-?	rs9435734	0	9435734	intron_variant	1	NR	1e-12	12		NA		NR [NR] (imputed)	N
8	rs6682671	1	17311882	rs6682671	2020-07-21	32193296	Grasby KL	2020-03-01	Science	www.ncbi.nlm.nih.gov/pubmed/32193296	The genetic architecture of the human cerebral cortex.	Cortical surface area	33,992 European ancestry individuals	14,727 European ancestry individuals, 2,943 individuals	1p36.13	NR	MFAP2 - ATP13A2	ENSG00000117122	ENSG00000159363		4755	571	rs6682671-T	rs6682671	0	6682671	intron_variant	1	0.6387	9e-10	9.04576	(Rostral Middle Frontal)	22.3887	[15.22-29.56] unit increase	Affymetrix, Illumina [NR]	N
8	rs6682671	1	17311882	rs6682671	2021-08-24	34021172	Christakoudi S	2021-05-21	Sci Rep	www.ncbi.nlm.nih.gov/pubmed/34021172	GWAS of allometric body-shape indices in UK Biobank identifies loci suggesting associations with morphogenesis, organogenesis, adrenal cell renewal and cancer.	A body shape index	219,872 British ancestry women	NA	1p36.13	RP1-37C10.3	MFAP2 - ATP13A2	ENSG00000117122	ENSG00000159363		4755	571	rs6682671-C	rs6682671	0	6682671	intron_variant	1	NR	2e-11	10.699		0.0201015	[0.014-0.026] unit decrease	Affymetrix [321169] (imputed)	N
8	rs6682671	1	17311882	rs6682671	2022-02-15	35078996	Gudjonsson A	2022-01-25	Nat Commun	www.ncbi.nlm.nih.gov/pubmed/35078996	A genome-wide association study of serum proteins reveals shared loci with common diseases.	Serum levels of protein SCGB1A1	5,344 Icelandic ancestry individuals	NA	1p36.13		MFAP2 - ATP13A2	ENSG00000117122	ENSG00000159363		4755	571	rs6682671-C	rs6682671	0	6682671	intron_variant	1	0.2956	1e-19	19		0.169458	[0.13-0.21] unit decrease	Illumina [7506463] (imputed)	N
8	rs6682671	1	17311882	rs6682671	2021-08-24	34021172	Christakoudi S	2021-05-21	Sci Rep	www.ncbi.nlm.nih.gov/pubmed/34021172	GWAS of allometric body-shape indices in UK Biobank identifies loci suggesting associations with morphogenesis, organogenesis, adrenal cell renewal and cancer.	Waist circumference adjusted for body mass index	219,872 British ancestry women	NA	1p36.13	RP1-37C10.3	MFAP2 - ATP13A2	ENSG00000117122	ENSG00000159363		4755	571	rs6682671-C	rs6682671	0	6682671	intron_variant	1	NR	2e-20	19.699		0.0276218	[0.022-0.033] unit decrease	Affymetrix [321114] (imputed)	N
8	rs6682671	1	17311882	rs6682671	2021-08-24	34021172	Christakoudi S	2021-05-21	Sci Rep	www.ncbi.nlm.nih.gov/pubmed/34021172	GWAS of allometric body-shape indices in UK Biobank identifies loci suggesting associations with morphogenesis, organogenesis, adrenal cell renewal and cancer.	Hip circumference adjusted for BMI	219,872 British ancestry women	NA	1p36.13	RP1-37C10.3	MFAP2 - ATP13A2	ENSG00000117122	ENSG00000159363		4755	571	rs6682671-C	rs6682671	0	6682671	intron_variant	1	NR	6e-13	12.2218		0.0212451	[0.015-0.027] unit decrease	Affymetrix [321016] (imputed)	N
8	rs9435672	1	17312743	rs3170740	2019-10-16	31562340	Akiyama M	2019-09-27	Nat Commun	www.ncbi.nlm.nih.gov/pubmed/31562340	Characterizing rare and low-frequency height-associated variants in the Japanese population.	Height	159,095 Japanese ancestry individuals	32,692 Japanese ancestry individuals	1p36.13	ATP13A2	ATP13A2			ENSG00000159363	NA	NA	rs3170740-?	rs3170740	0	3170740	missense_variant	0	NR	1e-37	37		0.0393705	[0.033-0.045] unit increase	Illumina [27896057] (imputed)	N
8	rs9435672	1	17312743	rs3170740	2020-06-17	32327693	Oskarsson GR	2020-04-23	Commun Biol	www.ncbi.nlm.nih.gov/pubmed/32327693	Predicted loss and gain of function mutations in ACO1 are associated with erythropoiesis.	Hemoglobin levels	684,122 European ancestry individuals	NA	1p36.13	ATP13A2	ATP13A2			ENSG00000159363	NA	NA	rs3170740-C	rs3170740	0	3170740	missense_variant	0		2e-09	8.69897		0.013	[NR] unit decrease	Affymetrix, Illumina [43000000] (imputed)	N
8	rs9435672	1	17312743	rs3170740	2021-12-14	34594039	Sakaue S	2021-09-30	Nat Genet	www.ncbi.nlm.nih.gov/pubmed/34594039	A cross-population atlas of genetic associations for 220 human phenotypes.	Height	165,056 East Asian ancestry individuals	NA	1p36.13		ATP13A2			ENSG00000159363	NA	NA	rs3170740-T	rs3170740	0	3170740	missense_variant	0	0.317935	2e-32	31.699		0.0258496	[0.022-0.03] unit increase	Illumina [13479295] (imputed)	N
8	rs9435672	1	17312743	rs3170740	2021-12-14	34594039	Sakaue S	2021-09-30	Nat Genet	www.ncbi.nlm.nih.gov/pubmed/34594039	A cross-population atlas of genetic associations for 220 human phenotypes.	Body mass index	359,983 European ancestry individuals, 163,835 East Asian ancestry individuals	NA	1p36.13		ATP13A2			ENSG00000159363	NA	NA	rs3170740-T	rs3170740	0	3170740	missense_variant	0	NR	1e-08	8		0.011	[0.0073-0.0147] unit decrease	Affymetrix, Illumina [20538802] (imputed)	N
8	rs2311528	1	17314702	rs3738815	2021-08-24	34021172	Christakoudi S	2021-05-21	Sci Rep	www.ncbi.nlm.nih.gov/pubmed/34021172	GWAS of allometric body-shape indices in UK Biobank identifies loci suggesting associations with morphogenesis, organogenesis, adrenal cell renewal and cancer.	Waist circumference adjusted for body mass index	219,872 British ancestry women	NA	1p36.13	RP1-37C10.3, ATP13A2	ATP13A2			ENSG00000159363	NA	NA	rs3738815-T	rs3738815	0	3738815	synonymous_variant	0	NR	2e-13	12.699		0.0266312	[0.02-0.034] unit decrease	Affymetrix [321114] (imputed)	N
8	rs3738814	1	17315425	rs4920605	2019-07-17	28552196	Tachmazidou I	2017-06-01	Am J Hum Genet	www.ncbi.nlm.nih.gov/pubmed/28552196	Whole-Genome Sequencing Coupled to Imputation Discovers Genetic Signals for Anthropometric Traits.	Hip circumference adjusted for BMI	1,247 whole genome sequenced European ancestry individuals, 3,052 whole genome sequenced individuals, 29,518 European ancestry individuals, 400 Carlantino (founder/genetic isolate) individuals, 831 Friuli Venezia Giulia (founder/genetic isolate) individuals, 998 Mylopotamos (founder/genetic isolate) individuals, 871 Pomak (founder/genetic isolate) individuals	205,905 European ancestry individuals	1p36.13	RP1-37C10.3, ATP13A2	ATP13A2			ENSG00000159363	NA	NA	rs4920605-A	rs4920605	0	4920605	intron_variant	0	0.5703	2e-09	8.69897		0.0487	[0.033-0.065] unit increase	Affymetrix, Illumina, Perlegen [15844966] (imputed)	N
8	rs3738814	1	17315425	rs4920605	2020-10-23	32665545	van der Meer D	2020-07-14	Nat Commun	www.ncbi.nlm.nih.gov/pubmed/32665545	Understanding the genetic determinants of the brain with MOSTest.	Brain morphology (MOSTest)	26,502 European ancestry individuals	NA	1p36.13	CROCC, MFAP2, ATP13A2, SDHB	ATP13A2			ENSG00000159363	NA	NA	rs4920605-?	rs4920605	0	4920605	intron_variant	0		2e-08	7.69897		NA		NR [7428630] (imputed)	N
8	rs3738814	1	17315425	rs4920605	2020-10-23	32665545	van der Meer D	2020-07-14	Nat Commun	www.ncbi.nlm.nih.gov/pubmed/32665545	Understanding the genetic determinants of the brain with MOSTest.	Brain morphology (min-P)	26,502 European ancestry individuals	NA	1p36.13	NR	ATP13A2			ENSG00000159363	NA	NA	rs4920605-?	rs4920605	0	4920605	intron_variant	0		3e-09	8.52288		NA		NR [7428630] (imputed)	N
8	rs3738814	1	17315425	rs4920605	2019-07-17	28552196	Tachmazidou I	2017-06-01	Am J Hum Genet	www.ncbi.nlm.nih.gov/pubmed/28552196	Whole-Genome Sequencing Coupled to Imputation Discovers Genetic Signals for Anthropometric Traits.	Waist circumference adjusted for body mass index	1,247 whole genome sequenced European ancestry individuals, 3,050 whole genome sequenced individuals, 41,027 European ancestry individuals, 397 Carlantino (founder/genetic isolate) individuals, 790 Friuli Venezia Giulia (founder/genetic isolate) individuals, 1,005 Mylopotamos (founder/genetic isolate) individuals, 875 Pomak (founder/genetic isolate) individuals, 1,754 Val Borbera (founder/genetic…	206,723 European ancestry individuals	1p36.13	RP1-37C10.3, ATP13A2	ATP13A2			ENSG00000159363	NA	NA	rs4920605-A	rs4920605	0	4920605	intron_variant	0	0.5604	4e-08	7.39794		0.0356	[0.023-0.048] unit increase	Affymetrix, Illumina, Perlegen [15844966] (imputed)	N
8	rs3738814	1	17315425	rs4920605	2018-07-05	29875488	Sun BB	2018-06-06	Nature	www.ncbi.nlm.nih.gov/pubmed/29875488	Genomic atlas of the human plasma proteome.	Blood protein levels	3,301 European ancestry individuals	NA	1p36.13	MFAP2	ATP13A2			ENSG00000159363	NA	NA	rs4920605-A	rs4920605	0	4920605	intron_variant	0	0.554	1e-17	17	(Microfibrillar-associated protein 2, MFAP2.9294.45.3)	0.21	[0.17-0.25] unit increase	Affymetrix [10572788] (imputed)	N
8	rs3738814	1	17315425	rs4920605	2020-10-23	32665545	van der Meer D	2020-07-14	Nat Commun	www.ncbi.nlm.nih.gov/pubmed/32665545	Understanding the genetic determinants of the brain with MOSTest.	Subcortical volume (min-P)	26,502 European ancestry individuals	NA	1p36.13	NR	ATP13A2			ENSG00000159363	NA	NA	rs4920605-?	rs4920605	0	4920605	intron_variant	0		8e-10	9.09691		NA		NR [7428630] (imputed)	N
8	rs3738814	1	17315425	rs4920605	2021-12-15	34560273	Shadrin AA	2021-09-21	Neuroimage	www.ncbi.nlm.nih.gov/pubmed/34560273	Vertex-wise multivariate genome-wide association study identifies 780 unique genetic loci associated with cortical morphology.	Cortical surface area	35,657 White British ancestry individuals	NA	1p36.13	NR	ATP13A2			ENSG00000159363	NA	NA	rs4920605-G	rs4920605	0	4920605	intron_variant	0	0.4303	1e-17	17		NA		NR [9056863] (imputed)	N
8	rs3738814	1	17315425	rs4920605	2022-11-23	35164939	van der Meer D	2022-02-11	Biol Psychiatry	www.ncbi.nlm.nih.gov/pubmed/35164939	Boosting Schizophrenia Genetics by Utilizing Genetic Overlap With Brain Morphology.	Brain morphology (MOSTest)	33,735 white British ancestry individuals	NA	1p36.13		ATP13A2			ENSG00000159363	NA	NA	rs4920605-?	rs4920605	0	4920605	intron_variant	0	NR	6e-14	13.2218		NA		NR [9061072] (imputed)	N
8	rs3738814	1	17315425	rs4920605	2021-08-24	34021172	Christakoudi S	2021-05-21	Sci Rep	www.ncbi.nlm.nih.gov/pubmed/34021172	GWAS of allometric body-shape indices in UK Biobank identifies loci suggesting associations with morphogenesis, organogenesis, adrenal cell renewal and cancer.	Waist circumference adjusted for body mass index	186,825 British ancestry men	NA	1p36.13	RP1-37C10.3, ATP13A2	ATP13A2			ENSG00000159363	NA	NA	rs4920605-G	rs4920605	0	4920605	intron_variant	0	NR	3e-18	17.5229		0.0270865	[0.021-0.033] unit decrease	Affymetrix [321114] (imputed)	N
8	rs3738814	1	17315425	rs4920605	2022-02-15	35078996	Gudjonsson A	2022-01-25	Nat Commun	www.ncbi.nlm.nih.gov/pubmed/35078996	A genome-wide association study of serum proteins reveals shared loci with common diseases.	Serum levels of protein MFAP2	5,365 Icelandic ancestry individuals	NA	1p36.13		ATP13A2			ENSG00000159363	NA	NA	rs4920605-G	rs4920605	0	4920605	intron_variant	0	0.4032	3e-22	21.5229		0.175849	[0.14-0.21] unit decrease	Illumina [7506463] (imputed)	N
8	rs3738814	1	17315425	rs4920605	2022-03-07	34910505	van der Meer D	2021-12-15	Sci Adv	www.ncbi.nlm.nih.gov/pubmed/34910505	The genetic architecture of human cortical folding.	Vertex-wise sulcal depth	33,748 European ancestry individuals	NA	1p36.13		ATP13A2			ENSG00000159363	NA	NA	rs4920605-G	rs4920605	0	4920605	intron_variant	0	0.45	3e-48	47.5229		14.6	z score increase	Affymetrix [9061022] (imputed)	N
8	rs3738814	1	17315425	rs4920605	2022-03-07	34910505	van der Meer D	2021-12-15	Sci Adv	www.ncbi.nlm.nih.gov/pubmed/34910505	The genetic architecture of human cortical folding.	Vertex-wise cortical surface area	33,748 European ancestry individuals	NA	1p36.13		ATP13A2			ENSG00000159363	NA	NA	rs4920605-G	rs4920605	0	4920605	intron_variant	0	0.45	1e-26	26		10.67	z score increase	Affymetrix [9061022] (imputed)	N
8	rs3738814	1	17315425	rs4920605	2021-08-24	34021172	Christakoudi S	2021-05-21	Sci Rep	www.ncbi.nlm.nih.gov/pubmed/34021172	GWAS of allometric body-shape indices in UK Biobank identifies loci suggesting associations with morphogenesis, organogenesis, adrenal cell renewal and cancer.	Hip circumference adjusted for BMI	186,825 British ancestry men	NA	1p36.13	RP1-37C10.3, ATP13A2	ATP13A2			ENSG00000159363	NA	NA	rs4920605-G	rs4920605	0	4920605	intron_variant	0	NR	2e-25	24.699		0.0321214	[0.026-0.038] unit decrease	Affymetrix [323123] (imputed)	N
8	rs2235932	1	17319011	rs2076603	2019-02-06	30595370	Kichaev G	2018-12-27	Am J Hum Genet	www.ncbi.nlm.nih.gov/pubmed/30595370	Leveraging Polygenic Functional Enrichment to Improve GWAS Power.	Body mass index	approximately 458,000 European ancestry individuals	NA	1p36.13		ATP13A2			ENSG00000159363	NA	NA	rs2076603-?	rs2076603	0	2076603	synonymous_variant	0	NR	3e-10	9.52288		NA		NR [~ 8900000] (imputed)	N
8	rs2235932	1	17319011	rs2076603	2022-03-28	33821002	Naqvi S	2021-04-05	Nat Genet	www.ncbi.nlm.nih.gov/pubmed/33821002	Shared heritability of human face and brain shape.	Brain shape (segment 31)	19,670 European ancestry individuals	NA	1p36.13		ATP13A2			ENSG00000159363	NA	NA	rs2076603-?	rs2076603	0	2076603	synonymous_variant	0	NR	5e-11	10.301		NA		NR [9705931] (imputed)	N
8	rs2235932	1	17319287	rs4920608	2018-05-11	29617998	Gao XR	2018-03-28	Hum Mol Genet	www.ncbi.nlm.nih.gov/pubmed/29617998	Genome-Wide Association Analyses Identify New Loci Influencing Intraocular Pressure.	Intraocular pressure	115,486 European ancestry individuals	NA	1p36.13	ATP13A2	ATP13A2			ENSG00000159363	NA	NA	rs4920608-C	rs4920608	0	4920608	intron_variant	0	0.3567	4e-08	7.39794		0.0793	[0.051-0.108] unit increase	Affymetrix [~ 11900000] (imputed)	N
8	rs2235932	1	17319287	rs4920608	2021-08-24	34021172	Christakoudi S	2021-05-21	Sci Rep	www.ncbi.nlm.nih.gov/pubmed/34021172	GWAS of allometric body-shape indices in UK Biobank identifies loci suggesting associations with morphogenesis, organogenesis, adrenal cell renewal and cancer.	Hip circumference adjusted for BMI	219,872 British ancestry women	NA	1p36.13	RP1-37C10.3, ATP13A2	ATP13A2			ENSG00000159363	NA	NA	rs4920608-C	rs4920608	0	4920608	intron_variant	0	NR	4e-12	11.3979		0.0203475	[0.015-0.026] unit decrease	Affymetrix [321016] (imputed)	N
8	rs9435672	1	17327429	rs7550758	2021-08-24	34021172	Christakoudi S	2021-05-21	Sci Rep	www.ncbi.nlm.nih.gov/pubmed/34021172	GWAS of allometric body-shape indices in UK Biobank identifies loci suggesting associations with morphogenesis, organogenesis, adrenal cell renewal and cancer.	A body shape index	219,872 British ancestry women	NA	1p36.13	RP1-37C10.3, ATP13A2	ATP13A2			ENSG00000159363	NA	NA	rs7550758-C	rs7550758	0	7550758	intron_variant	0	NR	3e-14	13.5229		0.0216017	[0.016-0.027] unit decrease	Affymetrix [321169] (imputed)	N
8	rs9435672	1	17327429	rs7550758	2021-08-24	34021172	Christakoudi S	2021-05-21	Sci Rep	www.ncbi.nlm.nih.gov/pubmed/34021172	GWAS of allometric body-shape indices in UK Biobank identifies loci suggesting associations with morphogenesis, organogenesis, adrenal cell renewal and cancer.	Waist circumference adjusted for body mass index	219,872 British ancestry women	NA	1p36.13	RP1-37C10.3, ATP13A2	ATP13A2			ENSG00000159363	NA	NA	rs7550758-C	rs7550758	0	7550758	intron_variant	0	NR	1e-26	26		0.0302507	[0.025-0.036] unit decrease	Affymetrix [321114] (imputed)	N
8	rs9435672	1	17327429	rs7550758	2021-08-24	34021172	Christakoudi S	2021-05-21	Sci Rep	www.ncbi.nlm.nih.gov/pubmed/34021172	GWAS of allometric body-shape indices in UK Biobank identifies loci suggesting associations with morphogenesis, organogenesis, adrenal cell renewal and cancer.	Waist-hip index	219,872 British ancestry women	NA	1p36.13	RP1-37C10.3, ATP13A2	ATP13A2			ENSG00000159363	NA	NA	rs7550758-C	rs7550758	0	7550758	intron_variant	0	NR	4e-09	8.39794		0.0165515	[0.011-0.022] unit decrease	Affymetrix [319769] (imputed)	N
8	rs9435672	1	17328200	rs6657613	2017-05-23	25673412	Shungin D	2015-02-12	Nature	www.ncbi.nlm.nih.gov/pubmed/25673412	New genetic loci link adipose and insulin biology to body fat distribution.	Hip circumference adjusted for BMI	up to 56,910 European ancestry men, up to 86,570 European ancestry women	up to 36,570 European ancestry men, 30,172 European ancestry women, 915 Filipino ancestry men, 735 Filipino ancestry women, 2,351 African American/Afro-Caribbean ancestry men, 6,258 African American/Afro-Caribbean ancestry women, 2,285 South Asian ancestry men, 506 South Asian ancestry women, 195 Seychellois ancestry men, 266 Seychellois ancestry women	1p36.13	ATP13A2	ATP13A2			ENSG00000159363	NA	NA	rs6657613-A	rs6657613	0	6657613	intron_variant	0	0.5026	4e-18	17.3979	(EA)	0.0309	[0.024-0.038] unit decrease	Affymetrix, Illumina, Perlegen [up to 2542447] (imputed)	N
8	rs9435672	1	17328200	rs6657613	2017-05-23	25673412	Shungin D	2015-02-12	Nature	www.ncbi.nlm.nih.gov/pubmed/25673412	New genetic loci link adipose and insulin biology to body fat distribution.	Hip circumference adjusted for BMI	up to 56,910 European ancestry men, up to 86,570 European ancestry women	up to 36,570 European ancestry men, 30,172 European ancestry women, 915 Filipino ancestry men, 735 Filipino ancestry women, 2,351 African American/Afro-Caribbean ancestry men, 6,258 African American/Afro-Caribbean ancestry women, 2,285 South Asian ancestry men, 506 South Asian ancestry women, 195 Seychellois ancestry men, 266 Seychellois ancestry women	1p36.13	ATP13A2	ATP13A2			ENSG00000159363	NA	NA	rs6657613-A	rs6657613	0	6657613	intron_variant	0	0.5026	4e-09	8.39794	(EA, women)	0.0268	[0.018-0.036] unit decrease	Affymetrix, Illumina, Perlegen [up to 2542447] (imputed)	N
8	rs9435672	1	17328200	rs6657613	2017-05-23	25673412	Shungin D	2015-02-12	Nature	www.ncbi.nlm.nih.gov/pubmed/25673412	New genetic loci link adipose and insulin biology to body fat distribution.	Hip circumference adjusted for BMI	up to 56,910 European ancestry men, up to 86,570 European ancestry women	up to 36,570 European ancestry men, 30,172 European ancestry women, 915 Filipino ancestry men, 735 Filipino ancestry women, 2,351 African American/Afro-Caribbean ancestry men, 6,258 African American/Afro-Caribbean ancestry women, 2,285 South Asian ancestry men, 506 South Asian ancestry women, 195 Seychellois ancestry men, 266 Seychellois ancestry women	1p36.13	ATP13A2	ATP13A2			ENSG00000159363	NA	NA	rs6657613-A	rs6657613	0	6657613	intron_variant	0	0.5026	7e-13	12.1549	(EA,men)	0.0364	[0.026-0.046] unit decrease	Affymetrix, Illumina, Perlegen [up to 2542447] (imputed)	N
8	rs9435672	1	17328200	rs6657613	2022-03-07	34910505	van der Meer D	2021-12-15	Sci Adv	www.ncbi.nlm.nih.gov/pubmed/34910505	The genetic architecture of human cortical folding.	Vertex-wise cortical thickness	33,748 European ancestry individuals	NA	1p36.13		ATP13A2			ENSG00000159363	NA	NA	rs6657613-A	rs6657613	0	6657613	intron_variant	0	0.48	3e-13	12.5229		7.28	z score increase	Affymetrix [9061022] (imputed)	N
8	rs9435672	1	17328200	rs6657613	2022-08-04	35505052	Fan CC	2022-05-03	Nat Commun	www.ncbi.nlm.nih.gov/pubmed/35505052	Multivariate genome-wide association study on tissue-sensitive diffusion metrics highlights pathways that shape the human brain.	Whole brain restricted isotropic diffusion (multivariate analysis)	23,543 European ancestry individuals	11,555 European ancestry individuals, 3,030 non-European ancestry individuals	1p36.13		ATP13A2			ENSG00000159363	NA	NA	rs6657613-?	rs6657613	0	6657613	intron_variant	0	NR	2e-13	12.699	(EA)	NA		NR [NR] (imputed)	N
8	rs9435672	1	17328200	rs6657613	2021-12-15	34560273	Shadrin AA	2021-09-21	Neuroimage	www.ncbi.nlm.nih.gov/pubmed/34560273	Vertex-wise multivariate genome-wide association study identifies 780 unique genetic loci associated with cortical morphology.	Cortical thickness	35,657 White British ancestry individuals	NA	1p36.13	NR	ATP13A2			ENSG00000159363	NA	NA	rs6657613-A	rs6657613	0	6657613	intron_variant	0	0.4896	1e-13	13		NA		NR [9056863] (imputed)	N
8	rs3738814	1	17331676	rs3738814	2015-07-15	25429064	He M	2014-11-26	Hum Mol Genet	www.ncbi.nlm.nih.gov/pubmed/25429064	Meta-analysis of genome-wide association studies of adult height in East Asians identifies 17 novel loci.	Height	36,227 East Asian ancestry individuals	57,699 East Asian ancestry individuals	1p36.13	ATP13A2	ATP13A2			ENSG00000159363	NA	NA	rs3738814-A	rs3738814	0	3738814	intron_variant	0	0.3	1e-24	24		0.061	[0.047-0.075] unit increase	Affymetrix, Illumina [2704730] (imputed)	N
8	rs3738814	1	17331676	rs3738814	2017-08-18	28448500	Graff M	2017-04-27	PLoS Genet	www.ncbi.nlm.nih.gov/pubmed/28448500	Genome-wide physical activity interactions in adiposity - A meta-analysis of 200,452 adults.	Waist circumference adjusted for BMI (joint analysis main effects and physical activity interaction)	2,518 African American women, 85,730 European ancestry women, 1,773 Filipino ancestry women, 1,030 Indian ancestry women, 1,457 African American men, 54,792 European ancestry men, 7,648 Indian ancestry men, 5,527 European ancestry individuals	6,244 African American women, 17,531 European ancestry women, 329 African American men, 19,956 European ancestry men	1p36.13	ATP13A2	ATP13A2			ENSG00000159363	NA	NA	rs3738814-?	rs3738814	0	3738814	intron_variant	0	0.5412	7e-10	9.1549	(women)	NA		Affymetrix, Illumina, Perlegen [~ 2500000] (imputed)	N
8	rs3738814	1	17331676	rs3738814	2017-08-18	28448500	Graff M	2017-04-27	PLoS Genet	www.ncbi.nlm.nih.gov/pubmed/28448500	Genome-wide physical activity interactions in adiposity - A meta-analysis of 200,452 adults.	Waist circumference adjusted for BMI in active individuals	1,957 African American women, 1,773 Filipino ancestry women, 305 Indian ancestry women, 67,139 European ancestry women, 1,206 African American men, 2,029 Indian ancestry men, 43,100 European ancestry men, at least 4,819 European ancestry individuals	4,807 African American women, 12,347 European ancestry women, 265 African American men, 14,540 European ancestry men	1p36.13	ATP13A2	ATP13A2			ENSG00000159363	NA	NA	rs3738814-A	rs3738814	0	3738814	intron_variant	0	0.5275	4e-10	9.39794	(women)	0.0375	[0.026-0.049] cm increase	Affymetrix, Illumina, Perlegen [~ 2500000] (imputed)	N
8	rs3738814	1	17331676	rs3738814	2010-03-25	20189936	Okada Y	2010-02-26	Hum Mol Genet	www.ncbi.nlm.nih.gov/pubmed/20189936	A genome-wide association study in 19 633 Japanese subjects identified LHX3-QSOX2 and IGF1 as adult height loci.	Height	19,633 Japanese ancestry individuals	NA	1p36.13	ATP13A2, SDHB	ATP13A2			ENSG00000159363	NA	NA	rs3738814-A	rs3738814	0	3738814	intron_variant	0	0.35	2e-07	6.69897		0.06	[0.04-0.08] cm increase	Illumina [420885]	N
8	rs3738814	1	17331676	rs3738814	2019-07-02	31217584	Wojcik GL	2019-06-19	Nature	www.ncbi.nlm.nih.gov/pubmed/31217584	Genetic analyses of diverse populations improves discovery for complex traits.	Height	17,286 African American individuals, 22,192 Hispanic/Latino individuals, 4,680 Asian ancestry individuals, 3,939 Native Hawaiian ancestry individuals, 647 Native American ancestry individuals, 1,052 individuals	NA	1p36.13	NR	ATP13A2			ENSG00000159363	NA	NA	rs3738814-?	rs3738814	0	3738814	intron_variant	0	NR	5e-10	9.30103		0.0353995	[0.024-0.047] unit decrease	Illumina [34656550] (imputed)	N
8	rs3738814	1	17331676	rs3738814	2022-11-17	36329257	Lee CJ	2022-11-03	Commun Biol	www.ncbi.nlm.nih.gov/pubmed/36329257	Phenome-wide analysis of Taiwan Biobank reveals novel glycemia-related loci and genetic risks for diabetes.	Lung function (FVC)	52,319 Taiwanese ancestry individuals	NA	1p36.13		ATP13A2			ENSG00000159363	NA	NA	rs3738814-?	rs3738814	0	3738814	intron_variant	0	NR	1e-08	8		0.0198467	unit decrease	NR [5925277] (imputed)	N
8	rs3738814	1	17331676	rs3738814	2022-08-05	35831902	Chiou JS	2022-07-13	BMC Med	www.ncbi.nlm.nih.gov/pubmed/35831902	Your height affects your health: genetic determinants and health-related outcomes in Taiwan.	Height	67,452 Han Chinese ancestry individuals	NA	1p36.13		ATP13A2			ENSG00000159363	NA	NA	rs3738814-A	rs3738814	0	3738814	intron_variant	0	NR	1e-12	12		0.04	[0.029-0.051] unit increase	Affymetrix [NR] (imputed)	N
8	rs3738814	1	17331676	rs3738814	2021-08-24	34021172	Christakoudi S	2021-05-21	Sci Rep	www.ncbi.nlm.nih.gov/pubmed/34021172	GWAS of allometric body-shape indices in UK Biobank identifies loci suggesting associations with morphogenesis, organogenesis, adrenal cell renewal and cancer.	Hip circumference adjusted for BMI	219,872 British ancestry women	NA	1p36.13	ATP13A2	ATP13A2			ENSG00000159363	NA	NA	rs3738814-G	rs3738814	0	3738814	intron_variant	0	NR	4e-20	19.3979		0.0259922	[0.02-0.032] unit decrease	Affymetrix [321016] (imputed)	N
8	rs3738814	1	17331676	rs3738814	2021-12-14	34594039	Sakaue S	2021-09-30	Nat Genet	www.ncbi.nlm.nih.gov/pubmed/34594039	A cross-population atlas of genetic associations for 220 human phenotypes.	Varicose veins	22,037 European ancestry cases, 437,665 European ancestry controls, 474 East Asian ancestry cases, 178,252 East Asian ancestry controls	NA	1p36.13		ATP13A2			ENSG00000159363	NA	NA	rs3738814-G	rs3738814	0	3738814	intron_variant	0	NR	8e-09	8.09691		0.0615	[0.041-0.082] unit decrease	Affymetrix, Illumina [25842955] (imputed)	N
8	rs9435672	1	17341752	rs2647167	2021-08-24	34021172	Christakoudi S	2021-05-21	Sci Rep	www.ncbi.nlm.nih.gov/pubmed/34021172	GWAS of allometric body-shape indices in UK Biobank identifies loci suggesting associations with morphogenesis, organogenesis, adrenal cell renewal and cancer.	Hip circumference adjusted for BMI	186,825 British ancestry men	NA	1p36.13	ATP13A2	ATP13A2 - SDHB	ENSG00000159363	ENSG00000117118		3329	3465	rs2647167-T	rs2647167	0	2647167	intergenic_variant	1	NR	2e-16	15.699		0.026201	[0.02-0.032] unit decrease	Affymetrix [323123] (imputed)	N
8	rs9435672	1	17342260	rs2746478	2021-08-24	34021172	Christakoudi S	2021-05-21	Sci Rep	www.ncbi.nlm.nih.gov/pubmed/34021172	GWAS of allometric body-shape indices in UK Biobank identifies loci suggesting associations with morphogenesis, organogenesis, adrenal cell renewal and cancer.	Waist circumference adjusted for body mass index	186,825 British ancestry men	NA	1p36.13	SDHB	ATP13A2 - SDHB	ENSG00000159363	ENSG00000117118		3837	2957	rs2746478-T	rs2746478	0	2746478	intergenic_variant	1	NR	4e-14	13.3979		0.0242526	[0.018-0.031] unit decrease	Affymetrix [321114] (imputed)	N
8	rs9435672	1	17342659	rs9435672	2022-08-04	35505052	Fan CC	2022-05-03	Nat Commun	www.ncbi.nlm.nih.gov/pubmed/35505052	Multivariate genome-wide association study on tissue-sensitive diffusion metrics highlights pathways that shape the human brain.	Whole brain restricted directional diffusion (multivariate analysis)	23,543 European ancestry individuals	11,555 European ancestry individuals, 3,030 non-European ancestry individuals	1p36.13		ATP13A2 - SDHB	ENSG00000159363	ENSG00000117118		4236	2558	rs9435672-?	rs9435672	0	9435672	upstream_gene_variant	1	NR	8e-12	11.0969	(EA)	NA		NR [NR] (imputed)	N
8	rs9435672	1	17342659	rs9435672	2021-08-24	34021172	Christakoudi S	2021-05-21	Sci Rep	www.ncbi.nlm.nih.gov/pubmed/34021172	GWAS of allometric body-shape indices in UK Biobank identifies loci suggesting associations with morphogenesis, organogenesis, adrenal cell renewal and cancer.	Hip circumference adjusted for BMI	219,872 British ancestry women	NA	1p36.13	SDHB	ATP13A2 - SDHB	ENSG00000159363	ENSG00000117118		4236	2558	rs9435672-G	rs9435672	0	9435672	upstream_gene_variant	1	NR	1e-14	14		0.021731	[0.016-0.027] unit decrease	Affymetrix [321016] (imputed)	N
8	rs9435672	1	17342783	rs11203280	2021-08-24	34021172	Christakoudi S	2021-05-21	Sci Rep	www.ncbi.nlm.nih.gov/pubmed/34021172	GWAS of allometric body-shape indices in UK Biobank identifies loci suggesting associations with morphogenesis, organogenesis, adrenal cell renewal and cancer.	A body shape index	219,872 British ancestry women	NA	1p36.13	SDHB	ATP13A2 - SDHB	ENSG00000159363	ENSG00000117118		4360	2434	rs11203280-T	rs11203280	0	11203280	intergenic_variant	1	NR	2e-11	10.699		0.0201026	[0.014-0.026] unit decrease	Affymetrix [321169] (imputed)	N
8	rs9435672	1	17342924	rs9435739	2021-08-24	34021172	Christakoudi S	2021-05-21	Sci Rep	www.ncbi.nlm.nih.gov/pubmed/34021172	GWAS of allometric body-shape indices in UK Biobank identifies loci suggesting associations with morphogenesis, organogenesis, adrenal cell renewal and cancer.	Waist circumference adjusted for body mass index	186,825 British ancestry men	NA	1p36.13	SDHB	ATP13A2 - SDHB	ENSG00000159363	ENSG00000117118		4501	2293	rs9435739-G	rs9435739	0	9435739	intergenic_variant	1	NR	1e-08	8		0.0186635	[0.012-0.025] unit decrease	Affymetrix [321114] (imputed)	N
8	rs9435672	1	17342924	rs9435739	2021-08-24	34021172	Christakoudi S	2021-05-21	Sci Rep	www.ncbi.nlm.nih.gov/pubmed/34021172	GWAS of allometric body-shape indices in UK Biobank identifies loci suggesting associations with morphogenesis, organogenesis, adrenal cell renewal and cancer.	Waist circumference adjusted for body mass index	219,872 British ancestry women	NA	1p36.13	SDHB	ATP13A2 - SDHB	ENSG00000159363	ENSG00000117118		4501	2293	rs9435739-G	rs9435739	0	9435739	intergenic_variant	1	NR	1e-13	13		0.0223178	[0.016-0.028] unit decrease	Affymetrix [321114] (imputed)	N
8	rs9435672	1	17342924	rs9435739	2021-08-24	34021172	Christakoudi S	2021-05-21	Sci Rep	www.ncbi.nlm.nih.gov/pubmed/34021172	GWAS of allometric body-shape indices in UK Biobank identifies loci suggesting associations with morphogenesis, organogenesis, adrenal cell renewal and cancer.	Hip circumference adjusted for BMI	186,825 British ancestry men	NA	1p36.13	SDHB	ATP13A2 - SDHB	ENSG00000159363	ENSG00000117118		4501	2293	rs9435739-G	rs9435739	0	9435739	intergenic_variant	1	NR	4e-14	13.3979		0.02447	[0.018-0.031] unit decrease	Affymetrix [323123] (imputed)	N
8	rs9435672	1	17350143	rs2235930	2021-08-24	34021172	Christakoudi S	2021-05-21	Sci Rep	www.ncbi.nlm.nih.gov/pubmed/34021172	GWAS of allometric body-shape indices in UK Biobank identifies loci suggesting associations with morphogenesis, organogenesis, adrenal cell renewal and cancer.	A body shape index	219,872 British ancestry women	NA	1p36.13	SDHB	SDHB			ENSG00000117118	NA	NA	rs2235930-A	rs2235930	0	2235930	intron_variant	0	NR	5e-10	9.30103		0.0180702	[0.012-0.024] unit decrease	Affymetrix [321169] (imputed)	N
8	rs9435672	1	17350931	rs12142244	2021-08-24	34021172	Christakoudi S	2021-05-21	Sci Rep	www.ncbi.nlm.nih.gov/pubmed/34021172	GWAS of allometric body-shape indices in UK Biobank identifies loci suggesting associations with morphogenesis, organogenesis, adrenal cell renewal and cancer.	Waist circumference adjusted for body mass index	186,825 British ancestry men	NA	1p36.13	SDHB	SDHB			ENSG00000117118	NA	NA	rs12142244-G	rs12142244	0	12142244	intron_variant	0	NR	2e-08	7.69897		0.017432	[0.011-0.024] unit decrease	Affymetrix [321114] (imputed)	N
8	rs9435672	1	17350931	rs12142244	2021-08-24	34021172	Christakoudi S	2021-05-21	Sci Rep	www.ncbi.nlm.nih.gov/pubmed/34021172	GWAS of allometric body-shape indices in UK Biobank identifies loci suggesting associations with morphogenesis, organogenesis, adrenal cell renewal and cancer.	Hip circumference adjusted for BMI	186,825 British ancestry men	NA	1p36.13	SDHB	SDHB			ENSG00000117118	NA	NA	rs12142244-G	rs12142244	0	12142244	intron_variant	0	NR	1e-12	12		0.0218458	[0.016-0.028] unit decrease	Affymetrix [323123] (imputed)	N
8	rs9435672	1	17398849	rs3818042	2020-09-21	32888493	Chen MH	2020-09-01	Cell	www.ncbi.nlm.nih.gov/pubmed/32888493	Trans-ethnic and Ancestry-Specific Blood-Cell Genetics in 746,667 Individuals from 5 Global Populations.	Hematocrit	737,823 African American or Afro-Caribbean, African ancestry, European ancestry, East Asian ancestry, Hispanic or Latin American and South Asian ancestry individuals	NA	1p36.13	NR	PADI2			ENSG00000117115	NA	NA	rs3818042-A	rs3818042	0	3818042	intron_variant	0	0.539048	9e-14	13.0458		NA		Affymetrix, Illumina [24558453] (imputed)	N
8	rs9435672	1	17398849	rs3818042	2020-09-21	32888493	Chen MH	2020-09-01	Cell	www.ncbi.nlm.nih.gov/pubmed/32888493	Trans-ethnic and Ancestry-Specific Blood-Cell Genetics in 746,667 Individuals from 5 Global Populations.	Hematocrit	562,259 European ancestry individuals	NA	1p36.13	NR	PADI2			ENSG00000117115	NA	NA	rs3818042-A	rs3818042	0	3818042	intron_variant	0	0.578621	2e-15	14.699		0.01482	[0.011-0.018] SD unit increase	Affymetrix, Illumina [50640577] (imputed)	N
8	rs9435672	1	17398849	rs3818042	2020-09-21	32888493	Chen MH	2020-09-01	Cell	www.ncbi.nlm.nih.gov/pubmed/32888493	Trans-ethnic and Ancestry-Specific Blood-Cell Genetics in 746,667 Individuals from 5 Global Populations.	Hemoglobin concentration	746,431 African American or Afro-Caribbean, African ancestry, European ancestry, East Asian ancestry, Hispanic or Latin American and South Asian ancestry individuals	NA	1p36.13	NR	PADI2			ENSG00000117115	NA	NA	rs3818042-A	rs3818042	0	3818042	intron_variant	0	0.538044	3e-15	14.5229		NA		Affymetrix, Illumina [24653286] (imputed)	N
8	rs9435672	1	17398849	rs3818042	2020-09-21	32888493	Chen MH	2020-09-01	Cell	www.ncbi.nlm.nih.gov/pubmed/32888493	Trans-ethnic and Ancestry-Specific Blood-Cell Genetics in 746,667 Individuals from 5 Global Populations.	Hemoglobin concentration	563,946 European ancestry individuals	NA	1p36.13	NR	PADI2			ENSG00000117115	NA	NA	rs3818042-A	rs3818042	0	3818042	intron_variant	0	0.57869	5e-17	16.301		0.015638	[0.012-0.019] SD unit increase	Affymetrix, Illumina [50638016] (imputed)	N
8	rs9435672	1	17398849	rs3818042	2021-08-24	34021172	Christakoudi S	2021-05-21	Sci Rep	www.ncbi.nlm.nih.gov/pubmed/34021172	GWAS of allometric body-shape indices in UK Biobank identifies loci suggesting associations with morphogenesis, organogenesis, adrenal cell renewal and cancer.	Waist circumference adjusted for body mass index	219,872 British ancestry women	NA	1p36.13	PADI2	PADI2			ENSG00000117115	NA	NA	rs3818042-G	rs3818042	0	3818042	intron_variant	0	NR	9e-19	18.0458		0.025387	[0.02-0.031] unit decrease	Affymetrix [321114] (imputed)	N
8	rs9435672	1	17404802	rs35108553	2021-08-24	34021172	Christakoudi S	2021-05-21	Sci Rep	www.ncbi.nlm.nih.gov/pubmed/34021172	GWAS of allometric body-shape indices in UK Biobank identifies loci suggesting associations with morphogenesis, organogenesis, adrenal cell renewal and cancer.	Waist-hip index	219,872 British ancestry women	NA	1p36.13	PADI2	PADI2			ENSG00000117115	NA	NA	rs35108553-T	rs35108553	0	35108553	intron_variant	0	NR	1e-08	8		0.0164631	[0.011-0.022] unit decrease	Affymetrix [319769] (imputed)	N
8	rs9435672	1	17405949	rs2057094	2020-12-04	33208821	Ishida S	2020-11-18	Commun Biol	www.ncbi.nlm.nih.gov/pubmed/33208821	Genome-wide association studies and heritability analysis reveal the involvement of host genetics in the Japanese gut microbiota.	Gut microbiota relative abundance (Ruminococcus belonging to family Lachnospiraceae)	1,068 Japanese ancestry individuals	NA	1p36.13	PADI2	PADI2			ENSG00000117115	NA	NA	rs2057094-A	rs2057094	0	2057094	intron_variant	0	0.43	8e-06	5.09691		0.141	[0.08-0.202] unit decrease	Illumina [6380737] (imputed)	N
8	rs9435672	1	17409382	rs2647187	2020-09-18	32888494	Vuckovic D	2020-09-01	Cell	www.ncbi.nlm.nih.gov/pubmed/32888494	The Polygenic and Monogenic Basis of Blood Traits and Diseases.	Hemoglobin	408,112 British individuals	NA	1p36.13	PADI2	PADI2			ENSG00000117115	NA	NA	rs2647187-C	rs2647187	0	2647187	non_coding_transcript_exon_variant	0	0.581413	8e-11	10.0969		0.0146247	[0.01-0.019] unit increase	Affymetrix [93095623] (imputed)	N
8	rs9435672	1	17409382	rs2647187	2021-12-14	34594039	Sakaue S	2021-09-30	Nat Genet	www.ncbi.nlm.nih.gov/pubmed/34594039	A cross-population atlas of genetic associations for 220 human phenotypes.	Hemoglobin	350,474 European ancestry individuals, 152,447 East Asian ancestry individuals	NA	1p36.13		PADI2			ENSG00000117115	NA	NA	rs2647187-C	rs2647187	0	2647187	non_coding_transcript_exon_variant	0	NR	2e-08	7.69897		0.0108	[0.0071-0.0145] unit increase	Affymetrix, Illumina [20538521] (imputed)	N
9	rs2854108	1	19925482	rs76193741	2020-04-17	31669095	Zhu Z	2019-10-24	J Allergy Clin Immunol	www.ncbi.nlm.nih.gov/pubmed/31669095	Shared Genetic and Experimental Links between Obesity-Related Traits and Asthma Subtypes in UK Biobank.	Body mass index	457,822 European ancestry individuals	NA	1p36.13	NR	MICOS10-NBL1, MICOS10, NBL1			ENSG00000270136, ENSG00000173436, ENSG00000158747	NA	NA	rs76193741-?	rs76193741	0	76193741	intron_variant	0	NR	2e-08	7.69897		NA		Affymetrix [~ 8270000] (imputed)	N
9	rs2854108	1	19925759	rs12024554	2019-11-04	30239722	Pulit SL	2018-09-14	Hum Mol Genet	www.ncbi.nlm.nih.gov/pubmed/30239722	Meta-analysis of genome-wide association studies for body fat distribution in 694,649 individuals of European ancestry.	Waist-hip ratio	697,734 European ancestry individuals	NA	1p36.13	NA	MICOS10, MICOS10-NBL1, NBL1			ENSG00000173436, ENSG00000270136, ENSG00000158747	NA	NA	rs12024554-T	rs12024554	0	12024554	intron_variant	0	0.2346	1e-10	10		0.0149	[0.01-0.019] unit decrease	NR [~ 27400000] (imputed)	N
9	rs2854108	1	19925759	rs12024554	2021-12-14	34594039	Sakaue S	2021-09-30	Nat Genet	www.ncbi.nlm.nih.gov/pubmed/34594039	A cross-population atlas of genetic associations for 220 human phenotypes.	Body mass index	359,983 European ancestry individuals, 163,835 East Asian ancestry individuals	NA	1p36.13		MICOS10, MICOS10-NBL1, NBL1			ENSG00000173436, ENSG00000270136, ENSG00000158747	NA	NA	rs12024554-T	rs12024554	0	12024554	intron_variant	0	NR	9e-09	8.04576		0.0122	[0.0081-0.0163] unit decrease	Affymetrix, Illumina [20538802] (imputed)	N
9	rs2854108	1	19934900	rs61740466	2019-02-06	30595370	Kichaev G	2018-12-27	Am J Hum Genet	www.ncbi.nlm.nih.gov/pubmed/30595370	Leveraging Polygenic Functional Enrichment to Improve GWAS Power.	Body mass index	approximately 458,000 European ancestry individuals	NA	1p36.13		MICOS10-NBL1, NBL1, MICOS10			ENSG00000270136, ENSG00000158747, ENSG00000173436	NA	NA	rs61740466-?	rs61740466	0	61740466	non_coding_transcript_exon_variant	0	NR	3e-08	7.52288		NA		NR [~ 8900000] (imputed)	N
9	rs2854108	1	19934900	rs61740466	2019-11-05	30239722	Pulit SL	2018-09-14	Hum Mol Genet	www.ncbi.nlm.nih.gov/pubmed/30239722	Meta-analysis of genome-wide association studies for body fat distribution in 694,649 individuals of European ancestry.	Body mass index	806,834 European ancestry individuals	NA	1p36.13	NA	MICOS10-NBL1, NBL1, MICOS10			ENSG00000270136, ENSG00000158747, ENSG00000173436	NA	NA	rs61740466-A	rs61740466	0	61740466	non_coding_transcript_exon_variant	0	0.2346	2e-10	9.69897		0.0142	[0.0099-0.0185] unit decrease	NR [~ 27400000] (imputed)	N
9	rs2854108	1	19961679	rs10917502	2022-03-28	33821002	Naqvi S	2021-04-05	Nat Genet	www.ncbi.nlm.nih.gov/pubmed/33821002	Shared heritability of human face and brain shape.	Brain shape (segment 15)	19,670 European ancestry individuals	NA	1p36.13		MICOS10-NBL1, NBL1			ENSG00000270136, ENSG00000158747	NA	NA	rs10917502-?	rs10917502	0	10917502	intron_variant	0	NR	5e-20	19.301		NA		NR [9705931] (imputed)	N
9	rs2854108	1	19964098	rs78170481	2022-11-23	35164939	van der Meer D	2022-02-11	Biol Psychiatry	www.ncbi.nlm.nih.gov/pubmed/35164939	Boosting Schizophrenia Genetics by Utilizing Genetic Overlap With Brain Morphology.	Brain morphology (MOSTest)	33,735 white British ancestry individuals	NA	1p36.13		NBL1, MICOS10-NBL1			ENSG00000158747, ENSG00000270136	NA	NA	rs78170481-?	rs78170481	0	78170481	intron_variant	0	NR	1e-20	20		NA		NR [9061072] (imputed)	N
9	rs2854108	1	19964098	rs78170481	2021-12-15	34560273	Shadrin AA	2021-09-21	Neuroimage	www.ncbi.nlm.nih.gov/pubmed/34560273	Vertex-wise multivariate genome-wide association study identifies 780 unique genetic loci associated with cortical morphology.	Cortical thickness	35,657 White British ancestry individuals	NA	1p36.13	NR	NBL1, MICOS10-NBL1			ENSG00000158747, ENSG00000270136	NA	NA	rs78170481-T	rs78170481	0	78170481	intron_variant	0	0.2387	2e-16	15.699		NA		NR [9056863] (imputed)	N
9	rs2854108	1	19968058	rs12408663	2019-05-21	30595370	Kichaev G	2018-12-27	Am J Hum Genet	www.ncbi.nlm.nih.gov/pubmed/30595370	Leveraging Polygenic Functional Enrichment to Improve GWAS Power.	Height	approximately 458,000 European ancestry individuals	NA	1p36.13		MICOS10-NBL1, NBL1			ENSG00000270136, ENSG00000158747	NA	NA	rs12408663-?	rs12408663	0	12408663	intron_variant	0	NR	6e-15	14.2218		NA		NR [~ 8900000] (imputed)	N
9	rs2854108	1	19968058	rs12408663	2020-10-23	32665545	van der Meer D	2020-07-14	Nat Commun	www.ncbi.nlm.nih.gov/pubmed/32665545	Understanding the genetic determinants of the brain with MOSTest.	Brain morphology (MOSTest)	26,502 European ancestry individuals	NA	1p36.13	CAPZB, MINOS1-NBL1, MINOS1, NBL1	MICOS10-NBL1, NBL1			ENSG00000270136, ENSG00000158747	NA	NA	rs12408663-?	rs12408663	0	12408663	intron_variant	0		3e-16	15.5229		NA		NR [7428630] (imputed)	N
9	rs2854108	1	19968058	rs12408663	2018-11-16	30072576	Emilsson V	2018-08-02	Science	www.ncbi.nlm.nih.gov/pubmed/30072576	Co-regulatory networks of human serum proteins link genetics to disease.	Blood protein levels	3,200 European ancestry individuals	NA	1p36.13	NBL1	MICOS10-NBL1, NBL1			ENSG00000270136, ENSG00000158747	NA	NA	rs12408663-T	rs12408663	0	12408663	intron_variant	0	0.787969	2e-07	6.69897	(NBL1, 2944_66_2)	0.145171	[0.09-0.2] unit increase	Illumina [> 1000000] (imputed)	N
9	rs2854108	1	19968058	rs12408663	2022-03-07	34910505	van der Meer D	2021-12-15	Sci Adv	www.ncbi.nlm.nih.gov/pubmed/34910505	The genetic architecture of human cortical folding.	Vertex-wise sulcal depth	8,072 individuals	NA	1p36.13		MICOS10-NBL1, NBL1			ENSG00000270136, ENSG00000158747	NA	NA	rs12408663-C	rs12408663	0	12408663	intron_variant	0	0.23	9e-07	6.04576		NA		NR [13131314] (imputed)	N
9	rs2854108	1	19968058	rs12408663	2021-12-15	34560273	Shadrin AA	2021-09-21	Neuroimage	www.ncbi.nlm.nih.gov/pubmed/34560273	Vertex-wise multivariate genome-wide association study identifies 780 unique genetic loci associated with cortical morphology.	Cortical surface area	35,657 White British ancestry individuals	NA	1p36.13	NR	MICOS10-NBL1, NBL1			ENSG00000270136, ENSG00000158747	NA	NA	rs12408663-C	rs12408663	0	12408663	intron_variant	0	0.2316	1e-17	17		NA		NR [9056863] (imputed)	N
9	rs2854108	1	19968058	rs12408663	2022-03-07	34910505	van der Meer D	2021-12-15	Sci Adv	www.ncbi.nlm.nih.gov/pubmed/34910505	The genetic architecture of human cortical folding.	Vertex-wise cortical thickness	33,748 European ancestry individuals	NA	1p36.13		MICOS10-NBL1, NBL1			ENSG00000270136, ENSG00000158747	NA	NA	rs12408663-C	rs12408663	0	12408663	intron_variant	0	0.23	3e-16	15.5229		8.18	z score increase	Affymetrix [9061022] (imputed)	N
9	rs2854108	1	19968058	rs12408663	2022-08-04	35505052	Fan CC	2022-05-03	Nat Commun	www.ncbi.nlm.nih.gov/pubmed/35505052	Multivariate genome-wide association study on tissue-sensitive diffusion metrics highlights pathways that shape the human brain.	Whole brain restricted isotropic diffusion (multivariate analysis)	23,543 European ancestry individuals	11,555 European ancestry individuals, 3,030 non-European ancestry individuals	1p36.13		MICOS10-NBL1, NBL1			ENSG00000270136, ENSG00000158747	NA	NA	rs12408663-?	rs12408663	0	12408663	intron_variant	0	NR	1e-14	14	(EA)	NA		NR [NR] (imputed)	N
9	rs2854108	1	19968058	rs12408663	2022-03-07	34910505	van der Meer D	2021-12-15	Sci Adv	www.ncbi.nlm.nih.gov/pubmed/34910505	The genetic architecture of human cortical folding.	Vertex-wise sulcal depth	33,748 European ancestry individuals	NA	1p36.13		MICOS10-NBL1, NBL1			ENSG00000270136, ENSG00000158747	NA	NA	rs12408663-C	rs12408663	0	12408663	intron_variant	0	0.23	8e-61	60.0969		16.45	z score increase	Affymetrix [9061022] (imputed)	N
9	rs2854108	1	19968058	rs12408663	2022-03-07	34910505	van der Meer D	2021-12-15	Sci Adv	www.ncbi.nlm.nih.gov/pubmed/34910505	The genetic architecture of human cortical folding.	Vertex-wise cortical surface area	33,748 European ancestry individuals	NA	1p36.13		MICOS10-NBL1, NBL1			ENSG00000270136, ENSG00000158747	NA	NA	rs12408663-C	rs12408663	0	12408663	intron_variant	0	0.23	1e-25	25		10.47	z score increase	Affymetrix [9061022] (imputed)	N
9	rs2854108	1	19973920	rs2854108	2020-10-23	32665545	van der Meer D	2020-07-14	Nat Commun	www.ncbi.nlm.nih.gov/pubmed/32665545	Understanding the genetic determinants of the brain with MOSTest.	Cortical surface area (MOSTest)	26,502 European ancestry individuals	NA	1p36.13	CROCC, MFAP2, ATP13A2, SDHB	MICOS10-NBL1, NBL1			ENSG00000270136, ENSG00000158747	NA	NA	rs2854108-?	rs2854108	0	2854108	intron_variant	0		3e-14	13.5229		NA		NR [7428630] (imputed)	N
9	rs2854108	1	19973920	rs2854108	2022-08-04	35505052	Fan CC	2022-05-03	Nat Commun	www.ncbi.nlm.nih.gov/pubmed/35505052	Multivariate genome-wide association study on tissue-sensitive diffusion metrics highlights pathways that shape the human brain.	Whole brain free water diffusion (multivariate analysis)	23,543 European ancestry individuals	11,555 European ancestry individuals, 3,030 non-European ancestry individuals	1p36.13		MICOS10-NBL1, NBL1			ENSG00000270136, ENSG00000158747	NA	NA	rs2854108-?	rs2854108	0	2854108	intron_variant	0	NR	6e-11	10.2218	(EA)	NA		NR [NR] (imputed)	N
9	rs2854108	1	19973920	rs2854108	2022-08-04	35505052	Fan CC	2022-05-03	Nat Commun	www.ncbi.nlm.nih.gov/pubmed/35505052	Multivariate genome-wide association study on tissue-sensitive diffusion metrics highlights pathways that shape the human brain.	Whole brain restricted directional diffusion (multivariate analysis)	23,543 European ancestry individuals	11,555 European ancestry individuals, 3,030 non-European ancestry individuals	1p36.13		MICOS10-NBL1, NBL1			ENSG00000270136, ENSG00000158747	NA	NA	rs2854108-?	rs2854108	0	2854108	intron_variant	0	NR	4e-16	15.3979		NA		NR [NR] (imputed)	N
10	rs6661141	1	22244592	rs9426781	2019-02-08	30595370	Kichaev G	2018-12-27	Am J Hum Genet	www.ncbi.nlm.nih.gov/pubmed/30595370	Leveraging Polygenic Functional Enrichment to Improve GWAS Power.	Lung function (FEV1/FVC)	approximately 370,000 European ancestry individuals	NA	1p36.12		HSPG2			ENSG00000142798	NA	NA	rs9426781-?	rs9426781	0	9426781	intron_variant	0	NR	4e-09	8.39794		NA		NR [~ 8900000] (imputed)	N
10	rs6661141	1	22245756	rs4233277	2022-03-07	34910505	van der Meer D	2021-12-15	Sci Adv	www.ncbi.nlm.nih.gov/pubmed/34910505	The genetic architecture of human cortical folding.	Vertex-wise cortical thickness	33,748 European ancestry individuals	NA	1p36.12		HSPG2			ENSG00000142798	NA	NA	rs4233277-T	rs4233277	0	4233277	intron_variant	0	0.37	7e-16	15.1549		8.07	z score increase	Affymetrix [9061022] (imputed)	N
10	rs6661141	1	22247498	rs12131384	2022-08-04	35505052	Fan CC	2022-05-03	Nat Commun	www.ncbi.nlm.nih.gov/pubmed/35505052	Multivariate genome-wide association study on tissue-sensitive diffusion metrics highlights pathways that shape the human brain.	Whole brain restricted directional diffusion (multivariate analysis)	23,543 European ancestry individuals	11,555 European ancestry individuals, 3,030 non-European ancestry individuals	1p36.12		HSPG2			ENSG00000142798	NA	NA	rs12131384-?	rs12131384	0	12131384	intron_variant	0	NR	3e-11	10.5229	(EA)	NA		NR [NR] (imputed)	N
10	rs6661141	1	22247498	rs12131384	2021-12-15	34560273	Shadrin AA	2021-09-21	Neuroimage	www.ncbi.nlm.nih.gov/pubmed/34560273	Vertex-wise multivariate genome-wide association study identifies 780 unique genetic loci associated with cortical morphology.	Cortical thickness	35,657 White British ancestry individuals	NA	1p36.12	NR	HSPG2			ENSG00000142798	NA	NA	rs12131384-C	rs12131384	0	12131384	intron_variant	0	0.3816	1e-14	14		NA		NR [9056863] (imputed)	N
10	rs6661141	1	22249589	rs9426785	2022-07-29	35393594	Zhao B	2022-04-07	Nat Genet	www.ncbi.nlm.nih.gov/pubmed/35393594	Common variants contribute to intrinsic human brain functional networks.	Brain rsFMRI measurement (amplitude of low frequency fluctations) (Net100_Node13)	34,691 British ancestry individuals	9,882 European ancestry individuals, 1,489 Caribbean, African American ancestry individuals, 768 Hispanic or Latin American individuals, 446 Indian, Pakistani,Bangladeshi, Chinese ancestry individuals	1p36.12		HSPG2			ENSG00000142798	NA	NA	rs9426785-?	rs9426785	0	9426785	intron_variant	0	NR	7e-12	11.1549	(European)	0.0512951	unit decrease	NR [9026427] (imputed)	N
10	rs6661141	1	22274061	rs61776287	2022-08-04	35505052	Fan CC	2022-05-03	Nat Commun	www.ncbi.nlm.nih.gov/pubmed/35505052	Multivariate genome-wide association study on tissue-sensitive diffusion metrics highlights pathways that shape the human brain.	Whole brain restricted isotropic diffusion (multivariate analysis)	23,543 European ancestry individuals	11,555 European ancestry individuals, 3,030 non-European ancestry individuals	1p36.12		HSPG2 - CELA3B	ENSG00000142798	ENSG00000219073		10258	29454	rs61776287-?	rs61776287	0	61776287	downstream_gene_variant	1	NR	4e-10	9.39794	(EA)	NA		NR [NR] (imputed)	N
10	rs6661141	1	22283671	rs10917075	2022-03-07	34910505	van der Meer D	2021-12-15	Sci Adv	www.ncbi.nlm.nih.gov/pubmed/34910505	The genetic architecture of human cortical folding.	Vertex-wise sulcal depth	33,748 European ancestry individuals	NA	1p36.12		HSPG2 - CELA3B	ENSG00000142798	ENSG00000219073		19868	19844	rs10917075-C	rs10917075	0	10917075	upstream_gene_variant	1	0.36	2e-17	16.699		8.5	z score increase	Affymetrix [9061022] (imputed)	N
10	rs55938609	1	22347396	rs12407439	2021-07-27	34211149	Mills MC	2021-07-01	Nat Hum Behav	www.ncbi.nlm.nih.gov/pubmed/34211149	Identification of 371 genetic variants for age at first sex and birth linked to externalising behaviour.	Age at first birth	542,901 European ancestry individuals	NA	1p36.12	LINC01635	CELA3A - LINC01635	ENSG00000142789	ENSG00000228397		8361	3087	rs12407439-A	rs12407439	0	12407439	intron_variant	1	0.8302	4e-08	7.39794		0.0754	[0.048-0.102] unit decrease	NR [9744772] (imputed)	N
10	rs3765350	1	22355978	rs10917123	2019-10-16	31562340	Akiyama M	2019-09-27	Nat Commun	www.ncbi.nlm.nih.gov/pubmed/31562340	Characterizing rare and low-frequency height-associated variants in the Japanese population.	Height	159,095 Japanese ancestry individuals	32,692 Japanese ancestry individuals	1p36.12	LINC00339	CDC42-AS1, LINC00339, CDC42			ENSG00000285752, ENSG00000218510, ENSG00000070831	NA	NA	rs10917123-?	rs10917123	0	10917123	intron_variant	0	NR	1e-08	8		0.0177315	[0.012-0.024] unit increase	Illumina [27896057] (imputed)	N
10	rs3765350	1	22355978	rs10917123	2021-08-24	34021172	Christakoudi S	2021-05-21	Sci Rep	www.ncbi.nlm.nih.gov/pubmed/34021172	GWAS of allometric body-shape indices in UK Biobank identifies loci suggesting associations with morphogenesis, organogenesis, adrenal cell renewal and cancer.	Hip index	186,825 British ancestry men	NA	1p36.12	LINC00339	CDC42-AS1, LINC00339, CDC42			ENSG00000285752, ENSG00000218510, ENSG00000070831	NA	NA	rs10917123-A	rs10917123	0	10917123	intron_variant	0	NR	4e-08	7.39794		0.0211302	[0.014-0.029] unit increase	Affymetrix [323858] (imputed)	N
10	rs3765350	1	22357229	rs3820687	2021-08-24	34021172	Christakoudi S	2021-05-21	Sci Rep	www.ncbi.nlm.nih.gov/pubmed/34021172	GWAS of allometric body-shape indices in UK Biobank identifies loci suggesting associations with morphogenesis, organogenesis, adrenal cell renewal and cancer.	Hip circumference adjusted for BMI	186,825 British ancestry men	NA	1p36.12	LINC00339	CDC42-AS1, LINC00339, CDC42			ENSG00000285752, ENSG00000218510, ENSG00000070831	NA	NA	rs3820687-T	rs3820687	0	3820687	non_coding_transcript_exon_variant	0	NR	3e-10	9.52288		0.0230769	[0.016-0.03] unit increase	Affymetrix [323123] (imputed)	N
10	rs10753528	1	22411177	rs2501261	2022-11-23	35164939	van der Meer D	2022-02-11	Biol Psychiatry	www.ncbi.nlm.nih.gov/pubmed/35164939	Boosting Schizophrenia Genetics by Utilizing Genetic Overlap With Brain Morphology.	Brain morphology (MOSTest)	33,735 white British ancestry individuals	NA	1p36.12		CDC42			ENSG00000070831	NA	NA	rs2501261-?	rs2501261	0	2501261	intron_variant	0	NR	4e-09	8.39794		NA		NR [9061072] (imputed)	N
10	rs55938609	1	22414785	rs2268179	2022-11-17	36329257	Lee CJ	2022-11-03	Commun Biol	www.ncbi.nlm.nih.gov/pubmed/36329257	Phenome-wide analysis of Taiwan Biobank reveals novel glycemia-related loci and genetic risks for diabetes.	Bone stiffness index	75,665 Taiwanese ancestry individuals	NA	1p36.12		CDC42			ENSG00000070831	NA	NA	rs2268179-?	rs2268179	0	2268179	3_prime_UTR_variant	0	NR	6e-12	11.2218	(Conditioned on rs12569102)	NA		NR [5925277] (imputed)	N
10	rs55938609	1	22415410	rs2268177	2020-01-09	23823483	Rhee EP	2013-07-02	Cell Metab	www.ncbi.nlm.nih.gov/pubmed/23823483	A genome-wide association study of the human metabolome in a community-based cohort.	Metabolite levels	2,076 European ancestry individuals	NA	1p36.12	WNT4	CDC42			ENSG00000070831	NA	NA	rs2268177-?	rs2268177	0	2268177	3_prime_UTR_variant	0	NR	5e-06	5.30103	(citrate)	0.242082	[0.14-0.35] unit decrease	Affymetrix [at least 2500000] (imputed)	N
10	rs55938609	1	22422721	rs10917151	2020-04-16	31488892	Masuda T	2019-09-05	Eur J Hum Genet	www.ncbi.nlm.nih.gov/pubmed/31488892	GWAS of five gynecologic diseases and cross-trait analysis in Japanese.	Uterine fibroids (MTAG)	5,236 Japanese ancestry cases, 39,556 Japanese ancestry controls	NA	1p36.12		CDC42			ENSG00000070831	NA	NA	rs10917151-?	rs10917151	0	10917151	3_prime_UTR_variant	0		3e-07	6.52288		1.03	(1.02-1.04)	Illumina [7645193] (imputed)	N
10	rs55938609	1	22422721	rs10917151	2020-04-16	31488892	Masuda T	2019-09-05	Eur J Hum Genet	www.ncbi.nlm.nih.gov/pubmed/31488892	GWAS of five gynecologic diseases and cross-trait analysis in Japanese.	Uterine fibroids	5,236 Japanese ancestry cases, 39,556 Japanese ancestry controls	NA	1p36.12		CDC42			ENSG00000070831	NA	NA	rs10917151-?	rs10917151	0	10917151	3_prime_UTR_variant	0		5e-12	11.301		1.14	(1.1-1.18)	Illumina [7645193] (imputed)	N
10	rs55938609	1	22422721	rs10917151	2018-10-19	30194396	Rafnar T	2018-09-07	Nat Commun	www.ncbi.nlm.nih.gov/pubmed/30194396	Variants associating with uterine leiomyoma highlight genetic background shared by various cancers and hormone-related traits.	Uterine fibroids	16,595 European ancestry cases, 523,330 European ancestry controls	NA	1p36.12	CDC42	CDC42			ENSG00000070831	NA	NA	rs10917151-A	rs10917151	0	10917151	3_prime_UTR_variant	0	0.20124	5e-14	13.301		1.12	[1.09-1.16]	Affymetrix, Illumina [43421991] (imputed)	N
10	rs55938609	1	22422721	rs10917151	2019-08-13	31249589	Edwards TL	2019-06-12	Front Genet	www.ncbi.nlm.nih.gov/pubmed/31249589	A Trans-Ethnic Genome-Wide Association Study of Uterine Fibroids.	Uterine fibroids	8,168 European ancestry cases, 65,134 European ancestry controls, 1,278 African ancestry cases, 1,914 African ancestry controls	12,111 European ancestry cases, 138,477 European ancestry controls, 247 African ancestry cases, 713 African ancestry controls	1p36.12	CDC42, WNT4	CDC42			ENSG00000070831	NA	NA	rs10917151-A	rs10917151	0	10917151	3_prime_UTR_variant	0	0.16	2e-24	23.699		1.16	[1.13-1.19]	Affymetrix, Illumina [NR] (imputed)	N
10	rs55938609	1	22436446	rs7412010	2019-12-05	31649266	Gallagher CS	2019-10-24	Nat Commun	www.ncbi.nlm.nih.gov/pubmed/31649266	Genome-wide association and epidemiological analyses reveal common genetic origins between uterine leiomyomata and endometriosis.	Uterine fibroids	20,406 European ancestry cases, 223,918 European ancestry controls	15,068 European ancestry cases, 43,587 European ancestry controls	1p36.12	WNT4, CDC42	CDC42 - WNT4	ENSG00000070831	ENSG00000162552		8593	7360	rs7412010-C	rs7412010	0	7412010	intergenic_variant	1	0.15	2e-29	28.699		1.13	[1.11-1.16]	Affymetrix, Illumina [8662096] (imputed)	N
10	rs55938609	1	22436446	rs7412010	2020-04-16	31488892	Masuda T	2019-09-05	Eur J Hum Genet	www.ncbi.nlm.nih.gov/pubmed/31488892	GWAS of five gynecologic diseases and cross-trait analysis in Japanese.	Gynecologic disease	7,975 Japanese ancestry cases, 39,556 Japanese ancestry controls	NA	1p36.12	WNT4, CDC42	CDC42 - WNT4	ENSG00000070831	ENSG00000162552		8593	7360	rs7412010-?	rs7412010	0	7412010	intergenic_variant	1		5e-11	10.301		1.12	[1.08-1.15]	Illumina [7645193] (imputed)	N
10	rs55938609	1	22436446	rs7412010	2020-04-16	31488892	Masuda T	2019-09-05	Eur J Hum Genet	www.ncbi.nlm.nih.gov/pubmed/31488892	GWAS of five gynecologic diseases and cross-trait analysis in Japanese.	Gynecologic disease (multivariate analysis)	up to 7,975 Japanese ancestry cases, 39,556 Japanese ancestry controls	NA	1p36.12	WNT4, CDC42	CDC42 - WNT4	ENSG00000070831	ENSG00000162552		8593	7360	rs7412010-?	rs7412010	0	7412010	intergenic_variant	1		7e-11	10.1549	(uterine fibroid)	NA		Illumina [7645193] (imputed)	N
10	rs55938609	1	22436446	rs7412010	2020-04-16	31488892	Masuda T	2019-09-05	Eur J Hum Genet	www.ncbi.nlm.nih.gov/pubmed/31488892	GWAS of five gynecologic diseases and cross-trait analysis in Japanese.	Uterine fibroids	5,236 Japanese ancestry cases, 39,556 Japanese ancestry controls	NA	1p36.12	CDC42, WNT4	CDC42 - WNT4	ENSG00000070831	ENSG00000162552		8593	7360	rs7412010-?	rs7412010	0	7412010	intergenic_variant	1		1e-12	12		1.15	[1.10-1.19]	Illumina [7645193] (imputed)	N
10	rs55938609	1	22436446	rs7412010	2020-04-16	31488892	Masuda T	2019-09-05	Eur J Hum Genet	www.ncbi.nlm.nih.gov/pubmed/31488892	GWAS of five gynecologic diseases and cross-trait analysis in Japanese.	Uterine fibroids (MTAG)	5,236 Japanese ancestry cases, 39,556 Japanese ancestry controls	NA	1p36.12	WNT4, CDC42	CDC42 - WNT4	ENSG00000070831	ENSG00000162552		8593	7360	rs7412010-?	rs7412010	0	7412010	intergenic_variant	1		5e-08	7.30103		1.03	[1.02-1.05]	Illumina [7645193] (imputed)	N
10	rs55938609	1	22436446	rs7412010	2020-04-16	31488892	Masuda T	2019-09-05	Eur J Hum Genet	www.ncbi.nlm.nih.gov/pubmed/31488892	GWAS of five gynecologic diseases and cross-trait analysis in Japanese.	Gynecologic disease	7,315 Japanese ancestry cases, 39,556 Japanese ancestry controls	NA	1p36.12	WNT4, CDC42	CDC42 - WNT4	ENSG00000070831	ENSG00000162552		8593	7360	rs7412010-?	rs7412010	0	7412010	intergenic_variant	1		4e-10	9.39794		NA		Illumina [7645193] (imputed)	N
10	rs55938609	1	22436446	rs7412010	2021-12-14	34594039	Sakaue S	2021-09-30	Nat Genet	www.ncbi.nlm.nih.gov/pubmed/34594039	A cross-population atlas of genetic associations for 220 human phenotypes.	Endometriosis	1,786 East Asian ancestry cases, 80,975 East Asian ancestry controls	NA	1p36.12		CDC42 - WNT4	ENSG00000070831	ENSG00000162552		8593	7360	rs7412010-C	rs7412010	0	7412010	intergenic_variant	1	0.578485	2e-09	8.69897		0.210067	[0.14-0.28] unit increase	Illumina [13403071] (imputed)	N
10	rs3765350	1	22439520	rs4654783	2021-12-14	34594039	Sakaue S	2021-09-30	Nat Genet	www.ncbi.nlm.nih.gov/pubmed/34594039	A cross-population atlas of genetic associations for 220 human phenotypes.	Height	165,056 East Asian ancestry individuals	NA	1p36.12		CDC42 - WNT4	ENSG00000070831	ENSG00000162552		11667	4286	rs4654783-C	rs4654783	0	4654783	regulatory_region_variant	1	0.298322	4e-09	8.39794		0.0128221	[0.0085-0.0171] unit decrease	Illumina [13479295] (imputed)	N
10	rs3765350	1	22444975	rs10737462	2018-03-05	29304378	Medina-Gomez C	2018-01-04	Am J Hum Genet	www.ncbi.nlm.nih.gov/pubmed/29304378	Life-Course Genome-wide Association Study Meta-analysis of Total Body BMD and Assessment of Age-Specific Effects.	Total body bone mineral density (age 0-15)	11,807 European and unknown ancestry individuals	NA	1p36.12	NR	WNT4			ENSG00000162552	NA	NA	rs10737462-T	rs10737462	0	10737462	3_prime_UTR_variant	0	0.2267	2e-09	8.69897		0.0925	unit decrease	Affymetrix, Illumina [~ 23700000] (imputed)	N
10	rs3765350	1	22447316	rs3765350	2014-12-18	24945404	Kemp JP	2014-06-19	PLoS Genet	www.ncbi.nlm.nih.gov/pubmed/24945404	Phenotypic dissection of bone mineral density reveals skeletal site specificity and facilitates the identification of novel loci in the genetic regulation of bone mass attainment.	Bone mineral density (paediatric, lower limb)	8,007 European ancestry children, 289 Surinamese ancestry children, 300 Turkish ancestry children, 232 Moroccan ancestry children, 588 children	NA	1p36.12	WNT4	WNT4			ENSG00000162552	NA	NA	rs3765350-A	rs3765350	0	3765350	intron_variant	0	NR	6e-08	7.22185	(EA)	0.1071	[0.068-0.146] unit increase	Illumina [~ 2500000] (imputed)	N
10	rs3765350	1	22447316	rs3765350	2014-12-18	24945404	Kemp JP	2014-06-19	PLoS Genet	www.ncbi.nlm.nih.gov/pubmed/24945404	Phenotypic dissection of bone mineral density reveals skeletal site specificity and facilitates the identification of novel loci in the genetic regulation of bone mass attainment.	Bone mineral density (paediatric, total body less head)	8,007 European ancestry children, 289 Surinamese ancestry children, 300 Turkish ancestry children, 232 Moroccan ancestry children, 588 children	NA	1p36.12	WNT4	WNT4			ENSG00000162552	NA	NA	rs3765350-A	rs3765350	0	3765350	intron_variant	0	0.78	7e-10	9.1549		0.107	[0.074-0.140] unit increase	Illumina [~ 2500000] (imputed)	N
10	rs3765350	1	22447316	rs3765350	2014-12-18	24945404	Kemp JP	2014-06-19	PLoS Genet	www.ncbi.nlm.nih.gov/pubmed/24945404	Phenotypic dissection of bone mineral density reveals skeletal site specificity and facilitates the identification of novel loci in the genetic regulation of bone mass attainment.	Bone mineral density (paediatric, total body less head)	8,007 European ancestry children, 289 Surinamese ancestry children, 300 Turkish ancestry children, 232 Moroccan ancestry children, 588 children	NA	1p36.12	WNT4	WNT4			ENSG00000162552	NA	NA	rs3765350-A	rs3765350	0	3765350	intron_variant	0	NR	4e-09	8.39794	(EA)	0.1159	[0.077-0.155] unit increase	Illumina [~ 2500000] (imputed)	N
10	rs3765350	1	22447316	rs3765350	2014-12-18	24945404	Kemp JP	2014-06-19	PLoS Genet	www.ncbi.nlm.nih.gov/pubmed/24945404	Phenotypic dissection of bone mineral density reveals skeletal site specificity and facilitates the identification of novel loci in the genetic regulation of bone mass attainment.	Bone mineral density (paediatric, lower limb)	8,007 European ancestry children, 289 Surinamese ancestry children, 300 Turkish ancestry children, 232 Moroccan ancestry children, 588 children	NA	1p36.12	WNT4	WNT4			ENSG00000162552	NA	NA	rs3765350-A	rs3765350	0	3765350	intron_variant	0	0.78	3e-08	7.52288		0.097	[0.062-0.132] unit increase	Illumina [~ 2500000] (imputed)	N
10	rs3765350	1	22447316	rs3765350	2017-09-21	28743860	Medina-Gomez C	2017-07-25	Nat Commun	www.ncbi.nlm.nih.gov/pubmed/28743860	Bivariate genome-wide association meta-analysis of pediatric musculoskeletal traits reveals pleiotropic effects at the SREBF1/TOM1L2 locus.	TB-LM or TBLH-BMD (pleiotropy)	8,327 European ancestry individuals, 2,087 individuals	NA	1p36.12	WNT4	WNT4			ENSG00000162552	NA	NA	rs3765350-G	rs3765350	0	3765350	intron_variant	0	0.23	6e-09	8.22185		NA		Illumina [2276811] (imputed)	N
10	rs3765350	1	22447316	rs3765350	2017-09-21	28743860	Medina-Gomez C	2017-07-25	Nat Commun	www.ncbi.nlm.nih.gov/pubmed/28743860	Bivariate genome-wide association meta-analysis of pediatric musculoskeletal traits reveals pleiotropic effects at the SREBF1/TOM1L2 locus.	Bone mineral density (paediatric, total body less head)	8,327 European ancestry individuals, 2,087 individuals	NA	1p36.12	WNT4	WNT4			ENSG00000162552	NA	NA	rs3765350-G	rs3765350	0	3765350	intron_variant	0	0.23	1e-08	8		0.0939	[NR] unit decrease	Illumina [2276811] (imputed)	N
10	rs55938609	1	22450487	rs2235529	2014-12-18	24945404	Kemp JP	2014-06-19	PLoS Genet	www.ncbi.nlm.nih.gov/pubmed/24945404	Phenotypic dissection of bone mineral density reveals skeletal site specificity and facilitates the identification of novel loci in the genetic regulation of bone mass attainment.	Bone mineral density (paediatric, upper limb)	8,007 European ancestry children, 289 Surinamese ancestry children, 300 Turkish ancestry children, 232 Moroccan ancestry children, 588 children	NA	1p36.12	WNT4	WNT4			ENSG00000162552	NA	NA	rs2235529-C	rs2235529	0	2235529	intron_variant	0	0.85	1e-08	8		0.117	[0.076-0.158] unit increase	Illumina [~ 2500000] (imputed)	N
10	rs55938609	1	22450487	rs2235529	2014-12-18	24945404	Kemp JP	2014-06-19	PLoS Genet	www.ncbi.nlm.nih.gov/pubmed/24945404	Phenotypic dissection of bone mineral density reveals skeletal site specificity and facilitates the identification of novel loci in the genetic regulation of bone mass attainment.	Bone mineral density (paediatric, upper limb)	8,007 European ancestry children, 289 Surinamese ancestry children, 300 Turkish ancestry children, 232 Moroccan ancestry children, 588 children	NA	1p36.12	WNT4	WNT4			ENSG00000162552	NA	NA	rs2235529-C	rs2235529	0	2235529	intron_variant	0	NR	3e-07	6.52288	(EA)	0.1173	[0.072-0.162] unit increase	Illumina [~ 2500000] (imputed)	N
10	rs55938609	1	22450487	rs2235529	2019-09-22	30575882	Lotta LA	2018-12-01	JAMA	www.ncbi.nlm.nih.gov/pubmed/30575882	Association of Genetic Variants Related to Gluteofemoral vs Abdominal Fat Distribution With Type 2 Diabetes, Coronary Disease, and Cardiovascular Risk Factors.	Waist-to-hip ratio adjusted for BMI	660,648 European ancestry individuals	NA	1p36.12	NR	WNT4			ENSG00000162552	NA	NA	rs2235529-C	rs2235529	0	2235529	intron_variant	0	0.84	2e-17	16.699		0.021	[0.016-0.026] unit increase	Affymetrix [2446094] (imputed)	N
10	rs55938609	1	22450487	rs2235529	2019-09-22	30575882	Lotta LA	2018-12-01	JAMA	www.ncbi.nlm.nih.gov/pubmed/30575882	Association of Genetic Variants Related to Gluteofemoral vs Abdominal Fat Distribution With Type 2 Diabetes, Coronary Disease, and Cardiovascular Risk Factors.	Waist-hip ratio	663,598 European ancestry individuals	NA	1p36.12	NR	WNT4			ENSG00000162552	NA	NA	rs2235529-C	rs2235529	0	2235529	intron_variant	0	0.84	5e-08	7.30103		NA		Affymetrix [2446094] (imputed)	N
10	rs55938609	1	22450487	rs2235529	2013-06-20	23472165	Albertsen HM	2013-03-05	PLoS One	www.ncbi.nlm.nih.gov/pubmed/23472165	Genome-wide association study link novel loci to endometriosis.	Endometriosis	1,514 European ancestry cases, 12,660 European ancestry controls	505 European ancestry cases, 1,811 European ancestry controls	1p36.12	LOC100289113, ZBTB40, WNT4	WNT4			ENSG00000162552	NA	NA	rs2235529-A	rs2235529	0	2235529	intron_variant	0	0.153	3e-09	8.52288		1.3	[1.19-1.41]	Illumina [580699]	N
10	rs55938609	1	22450487	rs2235529	2021-12-14	34594039	Sakaue S	2021-09-30	Nat Genet	www.ncbi.nlm.nih.gov/pubmed/34594039	A cross-population atlas of genetic associations for 220 human phenotypes.	Endometriosis	4,511 European ancestry cases, 227,260 European ancestry controls, 1,786 East Asian ancestry cases, 80,975 East Asian ancestry controls	NA	1p36.12		WNT4			ENSG00000162552	NA	NA	rs2235529-T	rs2235529	0	2235529	intron_variant	0	NR	2e-09	8.69897		0.1351	[0.091-0.179] unit increase	Affymetrix, Illumina [25734875] (imputed)	N
10	rs10753528	1	22451845	rs7526484	2019-02-06	29520040	Coleman JRI	2018-03-08	Mol Psychiatry	www.ncbi.nlm.nih.gov/pubmed/29520040	Biological annotation of genetic loci associated with intelligence in a meta-analysis of 87,740 individuals.	Extremely high intelligence	1,247 European ancestry cases, 86,493 European ancestry controls	NA	1p36.12	CDC42, WNT4	WNT4			ENSG00000162552	NA	NA	rs7526484-T	rs7526484	0	7526484	intron_variant	0	0.257	5e-08	7.30103		5.46	NR z-score increase	Illumina [up to 12595966] (imputed)	N
10	rs3765350	1	22458794	rs12404660	2019-02-08	30595370	Kichaev G	2018-12-27	Am J Hum Genet	www.ncbi.nlm.nih.gov/pubmed/30595370	Leveraging Polygenic Functional Enrichment to Improve GWAS Power.	Waist-hip ratio	approximately 458,000 European ancestry individuals	NA	1p36.12		WNT4			ENSG00000162552	NA	NA	rs12404660-?	rs12404660	0	12404660	intron_variant	0	NR	2e-13	12.699		NA		NR [~ 8900000] (imputed)	N
10	rs55938609	1	22462111	rs12037376	2017-08-18	28537267	Sapkota Y	2017-05-24	Nat Commun	www.ncbi.nlm.nih.gov/pubmed/28537267	Meta-analysis identifies five novel loci associated with endometriosis highlighting key genes involved in hormone metabolism.	Endometriosis	14,926 European ancestry cases, 189,715 European ancestry controls, 2,119 Japanese ancestry cases, 2,143 Japanese ancestry controls	NA	1p36.12	WNT4	WNT4			ENSG00000162552	NA	NA	rs12037376-A	rs12037376	0	12037376	intron_variant	0	0.17	9e-17	16.0458		1.16	1.12‚Äì1.19	Affymetrix, Illumina [up to 6979035] (imputed)	N
10	rs55938609	1	22462111	rs12037376	2017-08-18	28537267	Sapkota Y	2017-05-24	Nat Commun	www.ncbi.nlm.nih.gov/pubmed/28537267	Meta-analysis identifies five novel loci associated with endometriosis highlighting key genes involved in hormone metabolism.	Endometriosis	14,926 European ancestry cases, 189,715 European ancestry controls, 2,119 Japanese ancestry cases, 2,143 Japanese ancestry controls	NA	1p36.12	WNT4	WNT4			ENSG00000162552	NA	NA	rs12037376-A	rs12037376	0	12037376	intron_variant	0	0.17	1e-12	12	(EA)	1.14	1.10-1.19	Affymetrix, Illumina [up to 6979035] (imputed)	N
10	rs55938609	1	22462111	rs12037376	2017-08-18	28537267	Sapkota Y	2017-05-24	Nat Commun	www.ncbi.nlm.nih.gov/pubmed/28537267	Meta-analysis identifies five novel loci associated with endometriosis highlighting key genes involved in hormone metabolism.	Endometriosis	14,926 European ancestry cases, 189,715 European ancestry controls, 2,119 Japanese ancestry cases, 2,143 Japanese ancestry controls	NA	1p36.12	WNT4	WNT4			ENSG00000162552	NA	NA	rs12037376-A	rs12037376	0	12037376	intron_variant	0	0.58	2e-06	5.69897	(Japanese)	1.28	1.16-1.42	Affymetrix, Illumina [up to 6979035] (imputed)	N
10	rs55938609	1	22462111	rs12037376	2020-04-16	31488892	Masuda T	2019-09-05	Eur J Hum Genet	www.ncbi.nlm.nih.gov/pubmed/31488892	GWAS of five gynecologic diseases and cross-trait analysis in Japanese.	Endometriosis	645 Japanese ancestry cases, 39,556 Japanese ancestry controls	NA	1p36.12	NR	WNT4			ENSG00000162552	NA	NA	rs12037376-?	rs12037376	0	12037376	intron_variant	0		1e-06	6		1.31	(1.17-1.46)	Illumina [7645193] (imputed)	N
10	rs55938609	1	22462111	rs12037376	2018-10-19	30194396	Rafnar T	2018-09-07	Nat Commun	www.ncbi.nlm.nih.gov/pubmed/30194396	Variants associating with uterine leiomyoma highlight genetic background shared by various cancers and hormone-related traits.	Uterine fibroids	16,595 European ancestry cases, 523,330 European ancestry controls	NA	1p36.12	WNT4	WNT4			ENSG00000162552	NA	NA	rs12037376-A	rs12037376	0	12037376	intron_variant	0	NR	4e-08	7.39794		1.15	[1.09-1.21]	Affymetrix, Illumina [43421991] (imputed)	N
10	rs55938609	1	22462111	rs12037376	2021-08-24	34021172	Christakoudi S	2021-05-21	Sci Rep	www.ncbi.nlm.nih.gov/pubmed/34021172	GWAS of allometric body-shape indices in UK Biobank identifies loci suggesting associations with morphogenesis, organogenesis, adrenal cell renewal and cancer.	Waist-to-hip ratio adjusted for BMI	186,825 British ancestry men	NA	1p36.12	WNT4	WNT4			ENSG00000162552	NA	NA	rs12037376-A	rs12037376	0	12037376	intron_variant	0	NR	2e-09	8.69897		0.0256419	[0.017-0.034] unit decrease	Affymetrix [323858] (imputed)	N
10	rs55938609	1	22462111	rs12037376	2021-08-24	34021172	Christakoudi S	2021-05-21	Sci Rep	www.ncbi.nlm.nih.gov/pubmed/34021172	GWAS of allometric body-shape indices in UK Biobank identifies loci suggesting associations with morphogenesis, organogenesis, adrenal cell renewal and cancer.	Hip index	186,825 British ancestry men	NA	1p36.12	WNT4	WNT4			ENSG00000162552	NA	NA	rs12037376-A	rs12037376	0	12037376	intron_variant	0	NR	5e-10	9.30103		0.0273921	[0.019-0.036] unit increase	Affymetrix [323858] (imputed)	N
10	rs55938609	1	22462111	rs12037376	2021-08-24	34021172	Christakoudi S	2021-05-21	Sci Rep	www.ncbi.nlm.nih.gov/pubmed/34021172	GWAS of allometric body-shape indices in UK Biobank identifies loci suggesting associations with morphogenesis, organogenesis, adrenal cell renewal and cancer.	Waist-hip index	186,825 British ancestry men	NA	1p36.12	WNT4	WNT4			ENSG00000162552	NA	NA	rs12037376-A	rs12037376	0	12037376	intron_variant	0	NR	5e-09	8.30103		0.0250805	[0.017-0.033] unit decrease	Affymetrix [127266] (imputed)	N
10	rs55938609	1	22462111	rs12037376	2021-08-24	34021172	Christakoudi S	2021-05-21	Sci Rep	www.ncbi.nlm.nih.gov/pubmed/34021172	GWAS of allometric body-shape indices in UK Biobank identifies loci suggesting associations with morphogenesis, organogenesis, adrenal cell renewal and cancer.	Hip circumference adjusted for BMI	186,825 British ancestry men	NA	1p36.12	WNT4	WNT4			ENSG00000162552	NA	NA	rs12037376-A	rs12037376	0	12037376	intron_variant	0	NR	2e-14	13.699		0.0321716	[0.024-0.04] unit increase	Affymetrix [323123] (imputed)	N
10	rs55938609	1	22468215	rs3820282	2015-12-18	25581431	Kuchenbaecker KB	2015-01-12	Nat Genet	www.ncbi.nlm.nih.gov/pubmed/25581431	Identification of six new susceptibility loci for invasive epithelial ovarian cancer.	Epithelial ovarian cancer	4,368 European ancestry cases, 9,123 European ancestry controls,	2,462 European ancestry BRCA1 mutation carrier cases, 12,790 European ancestry BRCA1 mutation carrier controls, up to 631 European ancestry BRCA2 mutation carrier cases, 7,580 European ancestry BRCA2 mutation carrier controls, 9,627 European ancestry serous cases, 1,442 European ancestry non-serous cases, 21,722 European ancestry controls	1p36.12	WNT4	WNT4			ENSG00000162552	NA	NA	rs3820282-?	rs3820282	0	3820282	intron_variant	0	NR	2e-08	7.69897		1.11	[1.06-1.15]	Illumina [up to 10962898] (imputed)	N
10	rs55938609	1	22468215	rs3820282	2015-12-18	25581431	Kuchenbaecker KB	2015-01-12	Nat Genet	www.ncbi.nlm.nih.gov/pubmed/25581431	Identification of six new susceptibility loci for invasive epithelial ovarian cancer.	Epithelial ovarian cancer	4,368 European ancestry cases, 9,123 European ancestry controls,	2,462 European ancestry BRCA1 mutation carrier cases, 12,790 European ancestry BRCA1 mutation carrier controls, up to 631 European ancestry BRCA2 mutation carrier cases, 7,580 European ancestry BRCA2 mutation carrier controls, 9,627 European ancestry serous cases, 1,442 European ancestry non-serous cases, 21,722 European ancestry controls	1p36.12	WNT4	WNT4			ENSG00000162552	NA	NA	rs3820282-?	rs3820282	0	3820282	intron_variant	0	NR	8e-08	7.09691	(Serous)	1.12	[1.07-1.17]	Illumina [up to 10962898] (imputed)	N
10	rs55938609	1	22468215	rs3820282	2020-07-09	32184442	Olafsdottir T	2020-03-17	Commun Biol	www.ncbi.nlm.nih.gov/pubmed/32184442	Genome-wide association identifies seven loci for pelvic organ prolapse in Iceland and the UK Biobank.	Pelvic organ prolapse	15,010 European ancestry cases, 340,734 European ancestry controls	NA	1p36.12	WNT4	WNT4			ENSG00000162552	NA	NA	rs3820282-C	rs3820282	0	3820282	intron_variant	0	0.8283	3e-21	20.5229		1.17647	[1.14-1.22]	Affymetrix, Illumina [37144863] (imputed)	N
10	rs55938609	1	22468215	rs3820282	2021-02-26	32514122	Ishigaki K	2020-06-08	Nat Genet	www.ncbi.nlm.nih.gov/pubmed/32514122	Large-scale genome-wide association study in a Japanese population identifies novel susceptibility loci across different diseases.	Uterine fibroids	5,954 Japanese ancestry cases, 95,010 Japanese ancestry controls	NA	1p36.12		WNT4			ENSG00000162552	NA	NA	rs3820282-T	rs3820282	0	3820282	intron_variant	0	0.546288	2e-15	14.699		1.18273	[1.134949999-1.232516418]	Illumina [8919992] (imputed)	N
10	rs55938609	1	22468215	rs3820282	2022-07-12	35739095	Pujol-Gualdo N	2022-06-23	Nat Commun	www.ncbi.nlm.nih.gov/pubmed/35739095	Advancing our understanding of genetic risk factors and potential personalized strategies for pelvic organ prolapse.	Pelvic organ prolapse	28,086 European ancestry cases, 546,291 European ancestry controls	NA	1p36.12		WNT4			ENSG00000162552	NA	NA	rs3820282-T	rs3820282	0	3820282	intron_variant	0	0.16	4e-31	30.3979		0.86	[0.84-0.88]	Affymetrix, Illumina [15065244] (imputed)	N
10	rs55938609	1	22468215	rs3820282	2021-12-14	34594039	Sakaue S	2021-09-30	Nat Genet	www.ncbi.nlm.nih.gov/pubmed/34594039	A cross-population atlas of genetic associations for 220 human phenotypes.	Uterine fibroids	14,475 East Asian ancestry cases, 65,733 East Asian ancestry controls	NA	1p36.12		WNT4			ENSG00000162552	NA	NA	rs3820282-T	rs3820282	0	3820282	intron_variant	0	0.544512	9e-35	34.0458		0.170805	[0.14-0.2] unit increase	Illumina [13401454] (imputed)	N
10	rs55938609	1	22468215	rs3820282	2021-12-14	34594039	Sakaue S	2021-09-30	Nat Genet	www.ncbi.nlm.nih.gov/pubmed/34594039	A cross-population atlas of genetic associations for 220 human phenotypes.	Uterine fibroids	21,024 European ancestry cases, 237,694 European ancestry controls, 14,475 East Asian ancestry cases, 65,733 East Asian ancestry controls	NA	1p36.12		WNT4			ENSG00000162552	NA	NA	rs3820282-T	rs3820282	0	3820282	intron_variant	0	NR	4e-52	51.3979		0.1542	[0.13-0.17] unit increase	Affymetrix, Illumina [25795146] (imputed)	N
10	rs55938609	1	22468215	rs3820282	2021-12-14	34594039	Sakaue S	2021-09-30	Nat Genet	www.ncbi.nlm.nih.gov/pubmed/34594039	A cross-population atlas of genetic associations for 220 human phenotypes.	Uterine prolapse	10,647 European ancestry cases, 224,175 European ancestry controls, 423 East Asian ancestry cases, 82,338 East Asian ancestry controls	NA	1p36.12		WNT4			ENSG00000162552	NA	NA	rs3820282-T	rs3820282	0	3820282	intron_variant	0	NR	4e-19	18.3979		0.1783	[0.14-0.22] unit decrease	Affymetrix, Illumina [25752093] (imputed)	N
10	rs55938609	1	22470407	rs56318008	2018-03-05	29304378	Medina-Gomez C	2018-01-04	Am J Hum Genet	www.ncbi.nlm.nih.gov/pubmed/29304378	Life-Course Genome-wide Association Study Meta-analysis of Total Body BMD and Assessment of Age-Specific Effects.	Total body bone mineral density	56,284 European ancestry individuals, up to 1,333 African American individuals, up to 9,328 admixed individuals	NA	1p36.12	NR	WNT4			ENSG00000162552	NA	NA	rs56318008-T	rs56318008	0	56318008	5_prime_UTR_variant	0	0.1603	2e-25	24.699		0.0838	unit decrease	Affymetrix, Illumina [~ 23700000] (imputed)	N
10	rs55938609	1	22470407	rs56318008	2017-10-23	28877031	Zhang G	2017-09-07	N Engl J Med	www.ncbi.nlm.nih.gov/pubmed/28877031	Genetic Associations with Gestational Duration and Spontaneous Preterm Birth.	Gestational age at birth (maternal effect)	43,568 European ancestry mothers	8,643 European ancestry mothers	1p36.12	WNT4, CDC42, CELA3A	WNT4			ENSG00000162552	NA	NA	rs56318008-T	rs56318008	0	56318008	5_prime_UTR_variant	0	0.139	3e-14	13.5229		1.05	[NR] unit increase	Illumina [15635593] (imputed)	N
10	rs55938609	1	22470451	rs55938609	2017-07-19	28333195	Uimari O	2017-04-01	Hum Reprod	www.ncbi.nlm.nih.gov/pubmed/28333195	Genome-wide genetic analyses highlight mitogen-activated protein kinase (MAPK) signaling in the pathogenesis of endometriosis.	Endometriosis	3,194 European ancestry cases, 7,060 European ancestry controls.	NA	1p36.12	WNT4	WNT4			ENSG00000162552	NA	NA	rs55938609-?	rs55938609	0	55938609	5_prime_UTR_variant	0	NR	6e-07	6.22185		1.24	[1.15-1.35]	Illumina [NR] (imputed)	N
10	rs55938609	1	22472506	rs7519889	2018-09-20	28869591	Kemp JP	2017-09-04	Nat Genet	www.ncbi.nlm.nih.gov/pubmed/28869591	Identification of 153 new loci associated with heel bone mineral density and functional involvement of GPC6 in osteoporosis.	Heel bone mineral density	76,067 European ancestry women, 66,420 European ancestry men	NA	1p36.12	WNT4	WNT4 - NA	ENSG00000162552			2044	NA	rs7519889-G	rs7519889	0	7519889	intron_variant	1	0.794202	2e-16	15.699	(men)	0.0498186	[0.037-0.062] unit increase	NR [17166351] (imputed)	N
10	rs55938609	1	22472506	rs7519889	2018-09-20	28869591	Kemp JP	2017-09-04	Nat Genet	www.ncbi.nlm.nih.gov/pubmed/28869591	Identification of 153 new loci associated with heel bone mineral density and functional involvement of GPC6 in osteoporosis.	Heel bone mineral density	76,067 European ancestry women, 66,420 European ancestry men	NA	1p36.12	WNT4	WNT4 - NA	ENSG00000162552			2044	NA	rs7519889-G	rs7519889	0	7519889	intron_variant	1	0.795157	9e-33	32.0458		0.0470323	[0.039-0.055] unit increase	NR [17166351] (imputed)	N
10	rs55938609	1	22472506	rs7519889	2018-09-20	28869591	Kemp JP	2017-09-04	Nat Genet	www.ncbi.nlm.nih.gov/pubmed/28869591	Identification of 153 new loci associated with heel bone mineral density and functional involvement of GPC6 in osteoporosis.	Heel bone mineral density	76,067 European ancestry women, 66,420 European ancestry men	NA	1p36.12	WNT4	WNT4 - NA	ENSG00000162552			2044	NA	rs7519889-G	rs7519889	0	7519889	intron_variant	1	0.795991	1e-15	15	(women)	0.0421762	[0.031-0.053] unit increase	NR [17166351] (imputed)	N
10	rs55938609	1	22472506	rs7519889	2018-10-18	30048462	Kim SK	2018-07-26	PLoS One	www.ncbi.nlm.nih.gov/pubmed/30048462	Identification of 613 new loci associated with heel bone mineral density and a polygenic risk score for bone mineral density, osteoporosis and fracture.	Heel bone mineral density	394,929 European ancestry individuals	NA	1p36.12		WNT4 - NA	ENSG00000162552			2044	NA	rs7519889-?	rs7519889	0	7519889	intron_variant	1	NR	1e-56	56		0.0391361	[0.034-0.044] unit increase	Affymetrix [20259828] (imputed)	N
10	rs55938609	1	22472506	rs7519889	2021-08-24	34021172	Christakoudi S	2021-05-21	Sci Rep	www.ncbi.nlm.nih.gov/pubmed/34021172	GWAS of allometric body-shape indices in UK Biobank identifies loci suggesting associations with morphogenesis, organogenesis, adrenal cell renewal and cancer.	Hip circumference adjusted for BMI	186,825 British ancestry men	NA	1p36.12	WNT4	WNT4 - NA	ENSG00000162552			2044	NA	rs7519889-A	rs7519889	0	7519889	intron_variant	1	NR	6e-12	11.2218		0.0260899	[0.019-0.034] unit increase	Affymetrix [323123] (imputed)	N
10	rs55938609	1	22473410	rs7515106	2021-08-24	34021172	Christakoudi S	2021-05-21	Sci Rep	www.ncbi.nlm.nih.gov/pubmed/34021172	GWAS of allometric body-shape indices in UK Biobank identifies loci suggesting associations with morphogenesis, organogenesis, adrenal cell renewal and cancer.	Hip index	186,825 British ancestry men	NA	1p36.12	WNT4	WNT4 - PCNX2	ENSG00000162552	ENSG00000135749		2948	210836518	rs7515106-C	rs7515106	0	7515106	intron_variant	1	NR	3e-08	7.52288		0.0216231	[0.014-0.029] unit increase	Affymetrix [323858] (imputed)	N
10	rs3971300	1	22484575	rs3971300	2019-01-28	30598549	Morris JA	2018-12-31	Nat Genet	www.ncbi.nlm.nih.gov/pubmed/30598549	An atlas of genetic influences on osteoporosis in humans and mice.	Heel bone mineral density	426,824 British ancestry individuals	NA	1p36.12	WNT4	WNT4 - NA	ENSG00000162552			14113	NA	rs3971300-T	rs3971300	0	3971300	intergenic_variant	1	0.735224	7e-23	22.1549		0.022724	[0.018-0.027] unit increase	NR [13737936] (imputed)	N
10	rs3971300	1	22484575	rs3971300	2019-02-08	30595370	Kichaev G	2018-12-27	Am J Hum Genet	www.ncbi.nlm.nih.gov/pubmed/30595370	Leveraging Polygenic Functional Enrichment to Improve GWAS Power.	Heel bone mineral density	approximately 446,000 European ancestry individuals	NA	1p36.12		WNT4 - NA	ENSG00000162552			14113	NA	rs3971300-?	rs3971300	0	3971300	intergenic_variant	1	NR	7e-90	89.1549		NA		NR [~ 8900000] (imputed)	N
10	rs3971300	1	22484575	rs3971300	2018-03-05	29304378	Medina-Gomez C	2018-01-04	Am J Hum Genet	www.ncbi.nlm.nih.gov/pubmed/29304378	Life-Course Genome-wide Association Study Meta-analysis of Total Body BMD and Assessment of Age-Specific Effects.	Total body bone mineral density	56,284 European ancestry individuals, up to 1,333 African American individuals, up to 9,328 admixed individuals	NA	1p36.12	NR	WNT4 - NA	ENSG00000162552			14113	NA	rs3971300-T	rs3971300	0	3971300	intergenic_variant	1	0.7092	7e-23	22.1549	(European)	0.0693	unit increase	Affymetrix, Illumina [~ 23700000] (imputed)	N
10	rs3971300	1	22484575	rs3971300	2021-08-24	34021172	Christakoudi S	2021-05-21	Sci Rep	www.ncbi.nlm.nih.gov/pubmed/34021172	GWAS of allometric body-shape indices in UK Biobank identifies loci suggesting associations with morphogenesis, organogenesis, adrenal cell renewal and cancer.	Hip circumference adjusted for BMI	186,825 British ancestry men	NA	1p36.12	WNT4	WNT4 - NA	ENSG00000162552			14113	NA	rs3971300-C	rs3971300	0	3971300	intergenic_variant	1	NR	3e-08	7.52288		0.0191361	[0.012-0.026] unit increase	Affymetrix [323123] (imputed)	N
10	rs12094994	1	22486013	rs12094994	2021-08-24	34021172	Christakoudi S	2021-05-21	Sci Rep	www.ncbi.nlm.nih.gov/pubmed/34021172	GWAS of allometric body-shape indices in UK Biobank identifies loci suggesting associations with morphogenesis, organogenesis, adrenal cell renewal and cancer.	Hip circumference adjusted for BMI	186,825 British ancestry men	NA	1p36.12	WNT4	WNT4 - NA	ENSG00000162552			15551	NA	rs12094994-T	rs12094994	0	12094994	intergenic_variant	1	NR	5e-11	10.301		0.0247043	[0.017-0.032] unit increase	Affymetrix [323123] (imputed)	N
10	rs3971300	1	22490724	rs7521902	2017-05-23	25673412	Shungin D	2015-02-12	Nature	www.ncbi.nlm.nih.gov/pubmed/25673412	New genetic loci link adipose and insulin biology to body fat distribution.	Hip circumference adjusted for BMI	up to 56,910 European ancestry men, up to 86,570 European ancestry women	up to 36,570 European ancestry men, 30,172 European ancestry women, 915 Filipino ancestry men, 735 Filipino ancestry women, 2,351 African American/Afro-Caribbean ancestry men, 6,258 African American/Afro-Caribbean ancestry women, 2,285 South Asian ancestry men, 506 South Asian ancestry women, 195 Seychellois ancestry men, 266 Seychellois ancestry women	1p36.12	WNT4	WNT4 - NA	ENSG00000162552			20262	NA	rs7521902-A	rs7521902	0	7521902	regulatory_region_variant	1	0.2247	3e-08	7.52288	(EA)	0.0242	[0.016-0.033] unit increase	Affymetrix, Illumina, Perlegen [up to 2542447] (imputed)	N
10	rs3971300	1	22490724	rs7521902	2017-05-23	25673412	Shungin D	2015-02-12	Nature	www.ncbi.nlm.nih.gov/pubmed/25673412	New genetic loci link adipose and insulin biology to body fat distribution.	Hip circumference adjusted for BMI	up to 56,910 European ancestry men, up to 86,570 European ancestry women	up to 36,570 European ancestry men, 30,172 European ancestry women, 915 Filipino ancestry men, 735 Filipino ancestry women, 2,351 African American/Afro-Caribbean ancestry men, 6,258 African American/Afro-Caribbean ancestry women, 2,285 South Asian ancestry men, 506 South Asian ancestry women, 195 Seychellois ancestry men, 266 Seychellois ancestry women	1p36.12	WNT4	WNT4 - NA	ENSG00000162552			20262	NA	rs7521902-A	rs7521902	0	7521902	regulatory_region_variant	1	0.2247	3e-06	5.52288	(EA,men)	0.029	[0.017-0.041] unit increase	Affymetrix, Illumina, Perlegen [up to 2542447] (imputed)	N
10	rs3971300	1	22490724	rs7521902	2013-01-11	23104006	Nyholt DR	2012-10-28	Nat Genet	www.ncbi.nlm.nih.gov/pubmed/23104006	Genome-wide association meta-analysis identifies new endometriosis risk loci.	Endometriosis	3,181 European ancestry cases, 8,075 European ancestry controls, 1,423 Japanese ancestry cases, 1,318 Japanese ancestry controls	1,044 Japanese ancestry, 4,017 Japanese ancestry controls	1p36.12	WNT4	WNT4 - NA	ENSG00000162552			20262	NA	rs7521902-A	rs7521902	0	7521902	regulatory_region_variant	1	0.238	3e-11	10.5229		1.19	[1.13-1.25]	Illumina [407632]	N
10	rs3971300	1	22490724	rs7521902	2010-10-12	20852632	Goode EL	2010-09-19	Nat Genet	www.ncbi.nlm.nih.gov/pubmed/20852632	A genome-wide association study identifies susceptibility loci for ovarian cancer at 2q31 and 8q24.	Ovarian cancer	1,768 European ancestry cases, 2,354 European ancestry controls	8,709 European ancestry cases, 51,764 European ancestry controls	1p36.12	NR	WNT4 - NA	ENSG00000162552			20262	NA	rs7521902-?	rs7521902	0	7521902	regulatory_region_variant	1	NR	5e-06	5.30103		1.12	[1.07-1.18]	Illumina [2056878] (imputed)	N
10	rs3971300	1	22490724	rs7521902	2013-04-11	22504420	Estrada K	2012-04-15	Nat Genet	www.ncbi.nlm.nih.gov/pubmed/22504420	Genome-wide meta-analysis identifies 56 bone mineral density loci and reveals 14 loci associated with risk of fracture.	Lumbar spine bone mineral density	Up to 32,961 European and East Asian ancestry individuals	Up to 50,933 European and East Asian ancestry individuals	1p36.12	WNT4	WNT4 - NA	ENSG00000162552			20262	NA	rs7521902-A	rs7521902	0	7521902	regulatory_region_variant	1	0.31	1e-10	10		0.05	[NR] unit decrease	Affymetrix, Illumina [~ 2500000] (imputed)	N
10	rs3971300	1	22491843	rs4654785	2022-05-31	33875891	Smith SM	2021-04-19	Nat Neurosci	www.ncbi.nlm.nih.gov/pubmed/33875891	An expanded set of genome-wide association studies of brain imaging phenotypes in UK Biobank.	aseg global volume-ratio BrainSegVol-to-eTIV	21,282 British ancestry individuals	10,686 British ancestry individuals	1p36.12		WNT4 - MIR4418	ENSG00000162552	ENSG00000266564		21381	100889	rs4654785-G	rs4654785	0	4654785	intergenic_variant	1	0.258	2e-11	10.699		0.075	[0.053-0.097] unit increase	Affymetrix [17103079] (imputed)	N
10	rs12094994	1	22492887	rs3920498	2014-12-18	24945404	Kemp JP	2014-06-19	PLoS Genet	www.ncbi.nlm.nih.gov/pubmed/24945404	Phenotypic dissection of bone mineral density reveals skeletal site specificity and facilitates the identification of novel loci in the genetic regulation of bone mass attainment.	Bone mineral density (paediatric, skull)	7,976 European ancestry children, 289 Surinamese ancestry children, 300 Turkish ancestry children, 232 Moroccan ancestry children, 588 children	NA	1p36.12	WNT4	WNT4 - MIR4418	ENSG00000162552	ENSG00000266564		22425	99845	rs3920498-G	rs3920498	0	3920498	intergenic_variant	1	NR	1e-10	10	(EA)	0.139	[0.097-0.181] unit increase	Illumina [~ 2500000] (imputed)	N
10	rs12094994	1	22492887	rs3920498	2014-12-18	24945404	Kemp JP	2014-06-19	PLoS Genet	www.ncbi.nlm.nih.gov/pubmed/24945404	Phenotypic dissection of bone mineral density reveals skeletal site specificity and facilitates the identification of novel loci in the genetic regulation of bone mass attainment.	Bone mineral density (paediatric, skull)	7,976 European ancestry children, 289 Surinamese ancestry children, 300 Turkish ancestry children, 232 Moroccan ancestry children, 588 children	NA	1p36.12	WNT4	WNT4 - MIR4418	ENSG00000162552	ENSG00000266564		22425	99845	rs3920498-G	rs3920498	0	3920498	intergenic_variant	1	0.8	2e-12	11.699		0.134	[0.097-0.171] unit increase	Illumina [~ 2500000] (imputed)	N
10	rs12094994	1	22492887	rs3920498	2017-07-19	28333195	Uimari O	2017-04-01	Hum Reprod	www.ncbi.nlm.nih.gov/pubmed/28333195	Genome-wide genetic analyses highlight mitogen-activated protein kinase (MAPK) signaling in the pathogenesis of endometriosis.	Deep ovarian and/or rectovaginal disease with dense adhesions	1,364 European ancestry cases, 7,060 European ancestry controls.	NA	1p36.12	WNT4	WNT4 - MIR4418	ENSG00000162552	ENSG00000266564		22425	99845	rs3920498-?	rs3920498	0	3920498	intergenic_variant	1	NR	6e-07	6.22185		1.3	[1.18-1.43]	Illumina [NR] (imputed)	N
10	rs79364962	1	22531542	rs79364962	2019-01-28	30598549	Morris JA	2018-12-31	Nat Genet	www.ncbi.nlm.nih.gov/pubmed/30598549	An atlas of genetic influences on osteoporosis in humans and mice.	Heel bone mineral density	426,824 British ancestry individuals	NA	1p36.12	MIR4418	WNT4 - MIR4418	ENSG00000162552	ENSG00000266564		61080	61190	rs79364962-G	rs79364962	0	79364962	regulatory_region_variant	1	0.929558	3e-22	21.5229		0.0377243	[0.03-0.045] unit increase	NR [13737936] (imputed)	N
10	rs79364962	1	22531542	rs79364962	2018-10-18	30048462	Kim SK	2018-07-26	PLoS One	www.ncbi.nlm.nih.gov/pubmed/30048462	Identification of 613 new loci associated with heel bone mineral density and a polygenic risk score for bone mineral density, osteoporosis and fracture.	Heel bone mineral density	394,929 European ancestry individuals	NA	1p36.12		WNT4 - MIR4418	ENSG00000162552	ENSG00000266564		61080	61190	rs79364962-?	rs79364962	0	79364962	regulatory_region_variant	1	NR	4e-74	73.3979		0.0716648	[0.064-0.08] unit increase	Affymetrix [20259828] (imputed)	N
10	rs79364962	1	22531542	rs79364962	2021-08-24	34021172	Christakoudi S	2021-05-21	Sci Rep	www.ncbi.nlm.nih.gov/pubmed/34021172	GWAS of allometric body-shape indices in UK Biobank identifies loci suggesting associations with morphogenesis, organogenesis, adrenal cell renewal and cancer.	Hip circumference adjusted for BMI	219,872 British ancestry women	NA	1p36.12	WNT4	WNT4 - MIR4418	ENSG00000162552	ENSG00000266564		61080	61190	rs79364962-A	rs79364962	0	79364962	regulatory_region_variant	1	NR	2e-08	7.69897		0.0303963	[0.02-0.041] unit increase	Affymetrix [321016] (imputed)	N
10	rs34963268	1	22681214	rs34761529	2020-03-23	31900758	Han X	2020-01-03	Eur J Epidemiol	www.ncbi.nlm.nih.gov/pubmed/31900758	Using Mendelian randomization to evaluate the causal relationship between serum C-reactive protein levels and age-related macular degeneration.	C-reactive protein levels	418,642 British ancestry individuals	NA	1p36.12	NR	PPIAP34 - ZBTB40	ENSG00000234397	ENSG00000184677		31390	74117	rs34761529-C	rs34761529	0	34761529	intergenic_variant	1	0.795183	4e-09	8.39794		0.0150896	[0.01-0.02] unit increase	NR [NR]	N
10	rs34963268	1	22681214	rs34761529	2022-05-06	35459240	Said S	2022-04-22	Nat Commun	www.ncbi.nlm.nih.gov/pubmed/35459240	Genetic analysis of over half a million people characterises C-reactive protein loci.	C-reactive protein levels	575,531 European ancestry individuals	NA	1p36.12		PPIAP34 - ZBTB40	ENSG00000234397	ENSG00000184677		31390	74117	rs34761529-T	rs34761529	0	34761529	intergenic_variant	1	NR	2e-12	11.699		0.0179	[0.013-0.023] unit decrease	NR [11106737] (imputed)	N
10	rs34963268	1	22681214	rs34761529	2021-12-14	34594039	Sakaue S	2021-09-30	Nat Genet	www.ncbi.nlm.nih.gov/pubmed/34594039	A cross-population atlas of genetic associations for 220 human phenotypes.	Medication use (drugs affecting bone structure and mineralization)	7,870 European ancestry cases, 207,798 European ancestry controls, 6,143 East Asian ancestry cases, 172,583 East Asian ancestry controls	NA	1p36.12		PPIAP34 - ZBTB40	ENSG00000234397	ENSG00000184677		31390	74117	rs34761529-T	rs34761529	0	34761529	intergenic_variant	1	NR	2e-08	7.69897		0.0775	[0.05-0.105] unit decrease	Affymetrix, Illumina [15248280] (imputed)	N
10	rs34963268	1	22682366	rs12742784	2018-03-05	29304378	Medina-Gomez C	2018-01-04	Am J Hum Genet	www.ncbi.nlm.nih.gov/pubmed/29304378	Life-Course Genome-wide Association Study Meta-analysis of Total Body BMD and Assessment of Age-Specific Effects.	Total body bone mineral density (age 30-45)	10,062 European and unknown ancestry individuals	NA	1p36.12	NR	PPIAP34 - ZBTB40	ENSG00000234397	ENSG00000184677		32542	72965	rs12742784-T	rs12742784	0	12742784	intergenic_variant	1	0.2193	7e-10	9.1549		0.1126	unit increase	Affymetrix, Illumina [~ 23700000] (imputed)	N
10	rs34963268	1	22682366	rs12742784	2019-01-31	27476799	Nielson CM	2016-09-06	J Bone Miner Res	www.ncbi.nlm.nih.gov/pubmed/27476799	Novel Genetic Variants Associated With Increased Vertebral Volumetric BMD, Reduced Vertebral Fracture Risk, and Increased Expression of SLC1A3 and EPHB2.	Lumbar spine bone mineral density (trabecular)	12,287 European ancestry individuals	2,987 individuals	1p36.12	ZBTB40	PPIAP34 - ZBTB40	ENSG00000234397	ENSG00000184677		32542	72965	rs12742784-C	rs12742784	0	12742784	intergenic_variant	1	0.21	1e-10	10		0.094	[0.065-0.123] unit increase	Affymetrix, Illumina [up to 37790451] (imputed)	N
[truncated: 38,147 more rows]

## Sheet: Table S8
Table S8 | Genes significantly annotated by MAGMA in the UDIP-FA meta-multivariate GWAS
GENE	CHR	START	STOP	NSNPS	NPARAM	N	ZSTAT	P	SYMBOL
[truncated: 2,201 more rows]

## Sheet: Table S9
Table S9 | Gene annotation of signicant SNP of UDIP-FA by FUMA
[truncated: 2,821 more rows]

[truncated: 6 more sheets: Table S10, Table S11, Table S12, Table S13, Table S14, Table S15]
